# Supplementary material for: 5-((3-Amidobenzyl)oxy)nicotinamides as SIRT2 Inhibitors: A Study of Constrained Analogs
Source: MDPI journal article supplement (doi:10.3390/molecules28227655), 2023-11-18

## **Supplementary Materials**

### **5-((3-Amidobenzyl)oxy)nicotinamides as SIRT2 Inhibitors: A Study of Constrained Analogs**

Teng Ai, Daniel J. Wilson, Liqiang Chen\*

Center for Drug Design, College of Pharmacy, University of Minnesota, Minneapolis, Minnesota  
55455, United States

TA-2-032 PROTON\_01  
TA-2-032

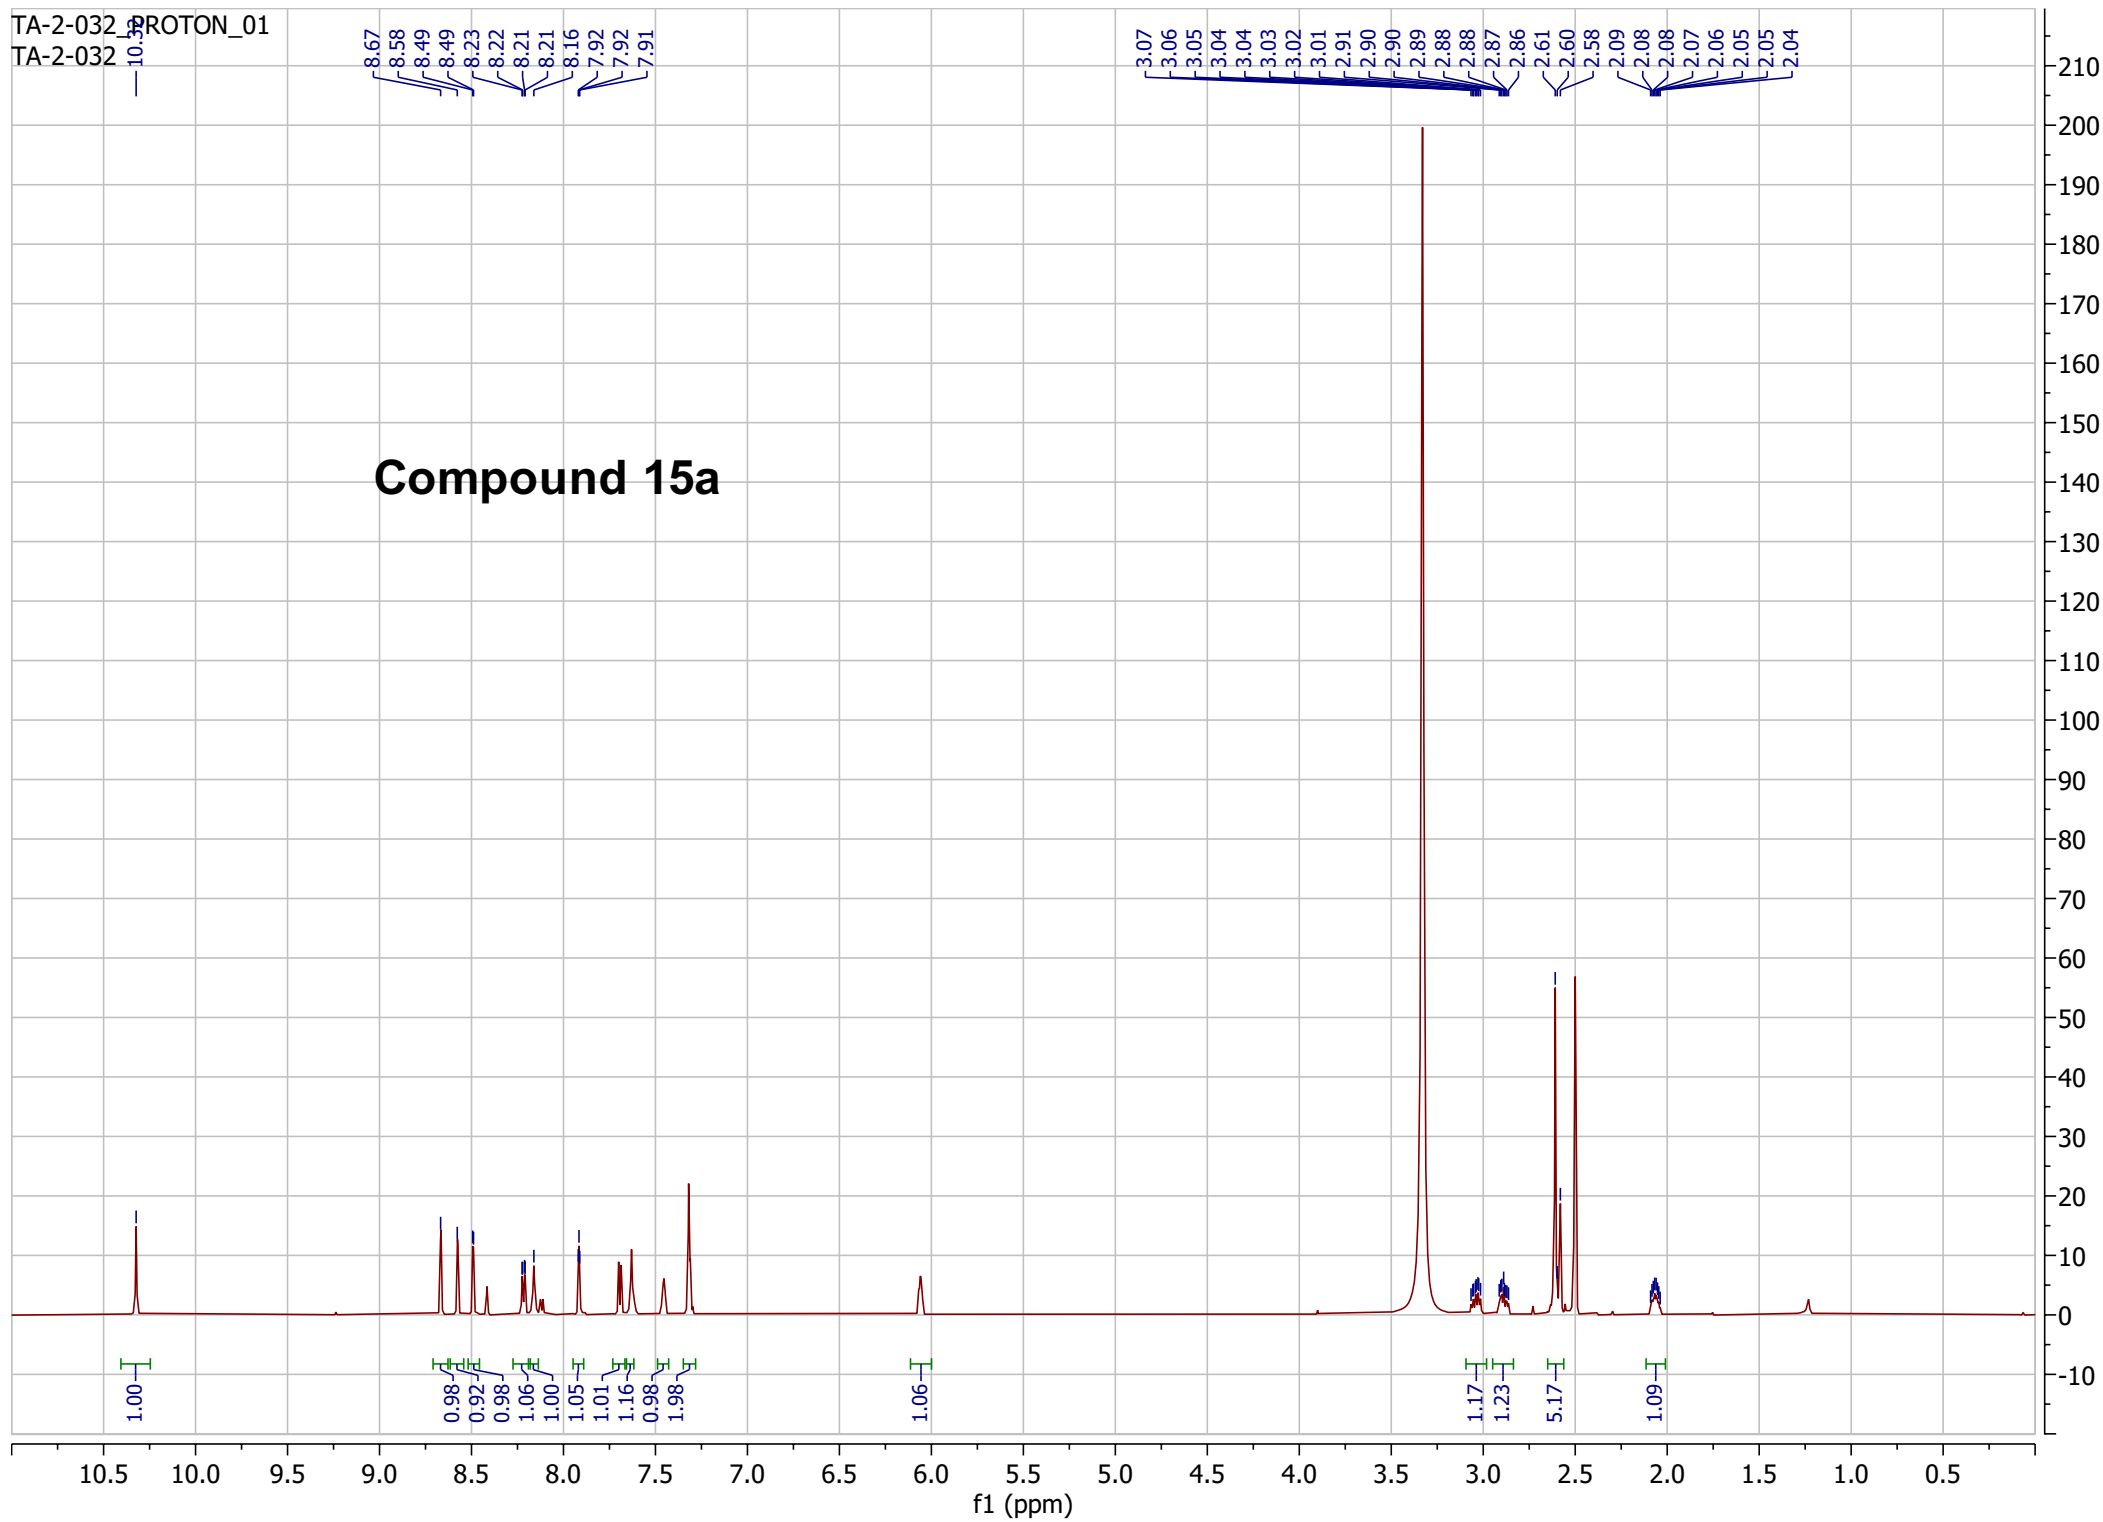

TA-2-039 PROTON\_01  
TA-2-039

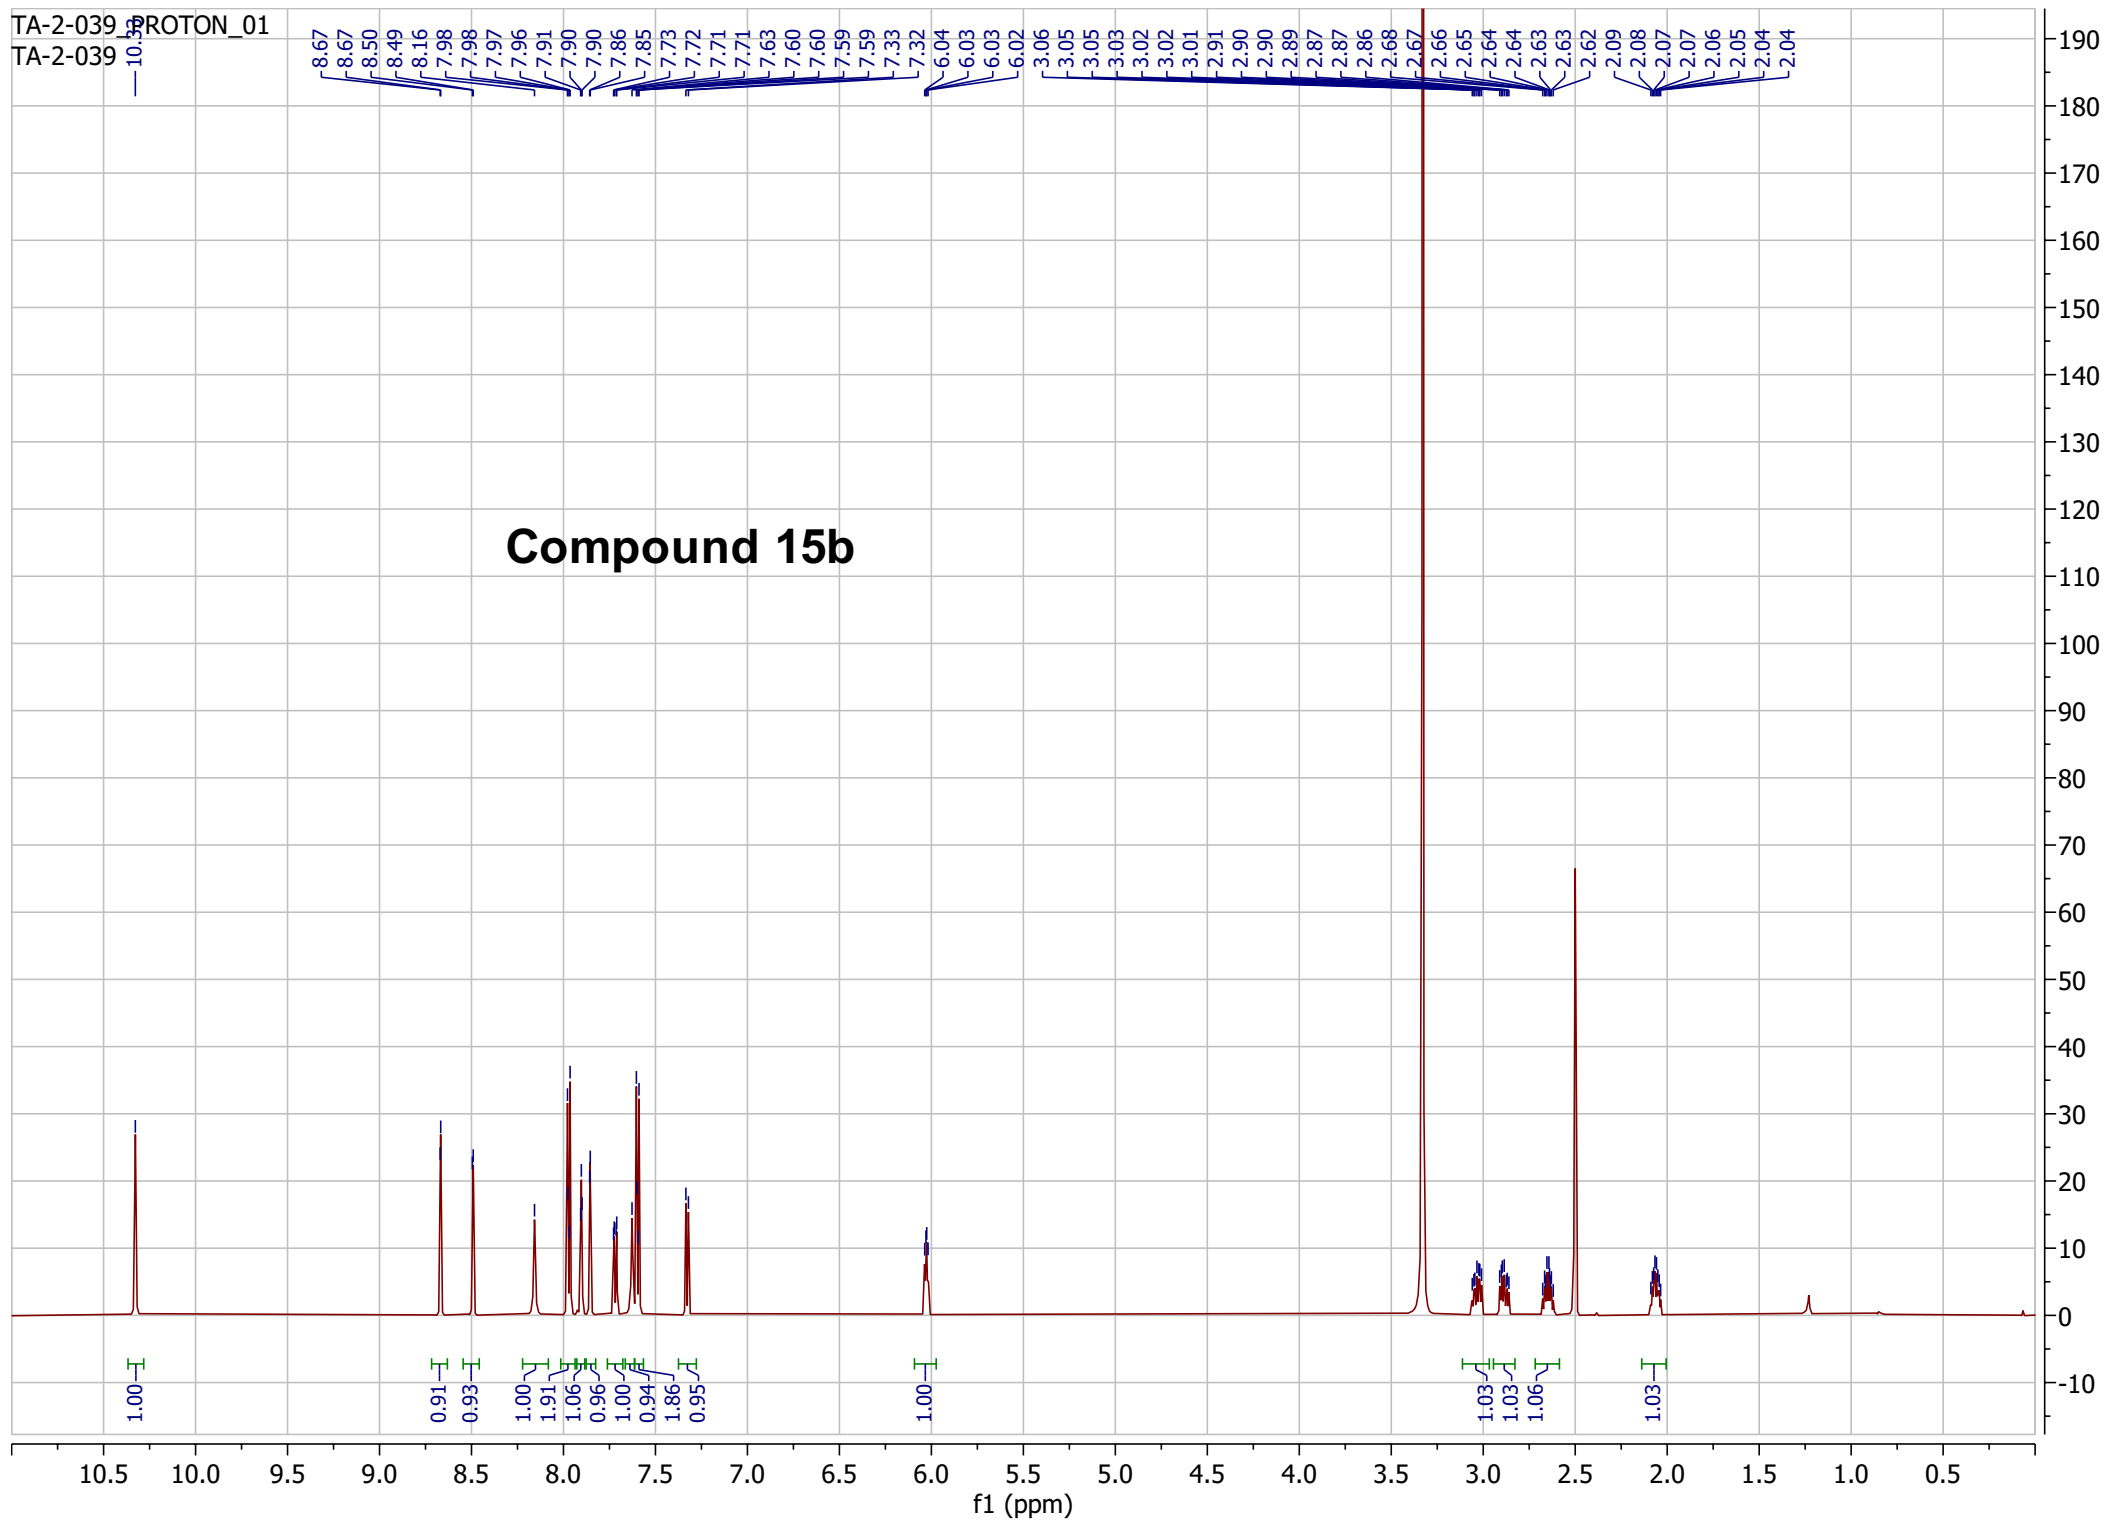

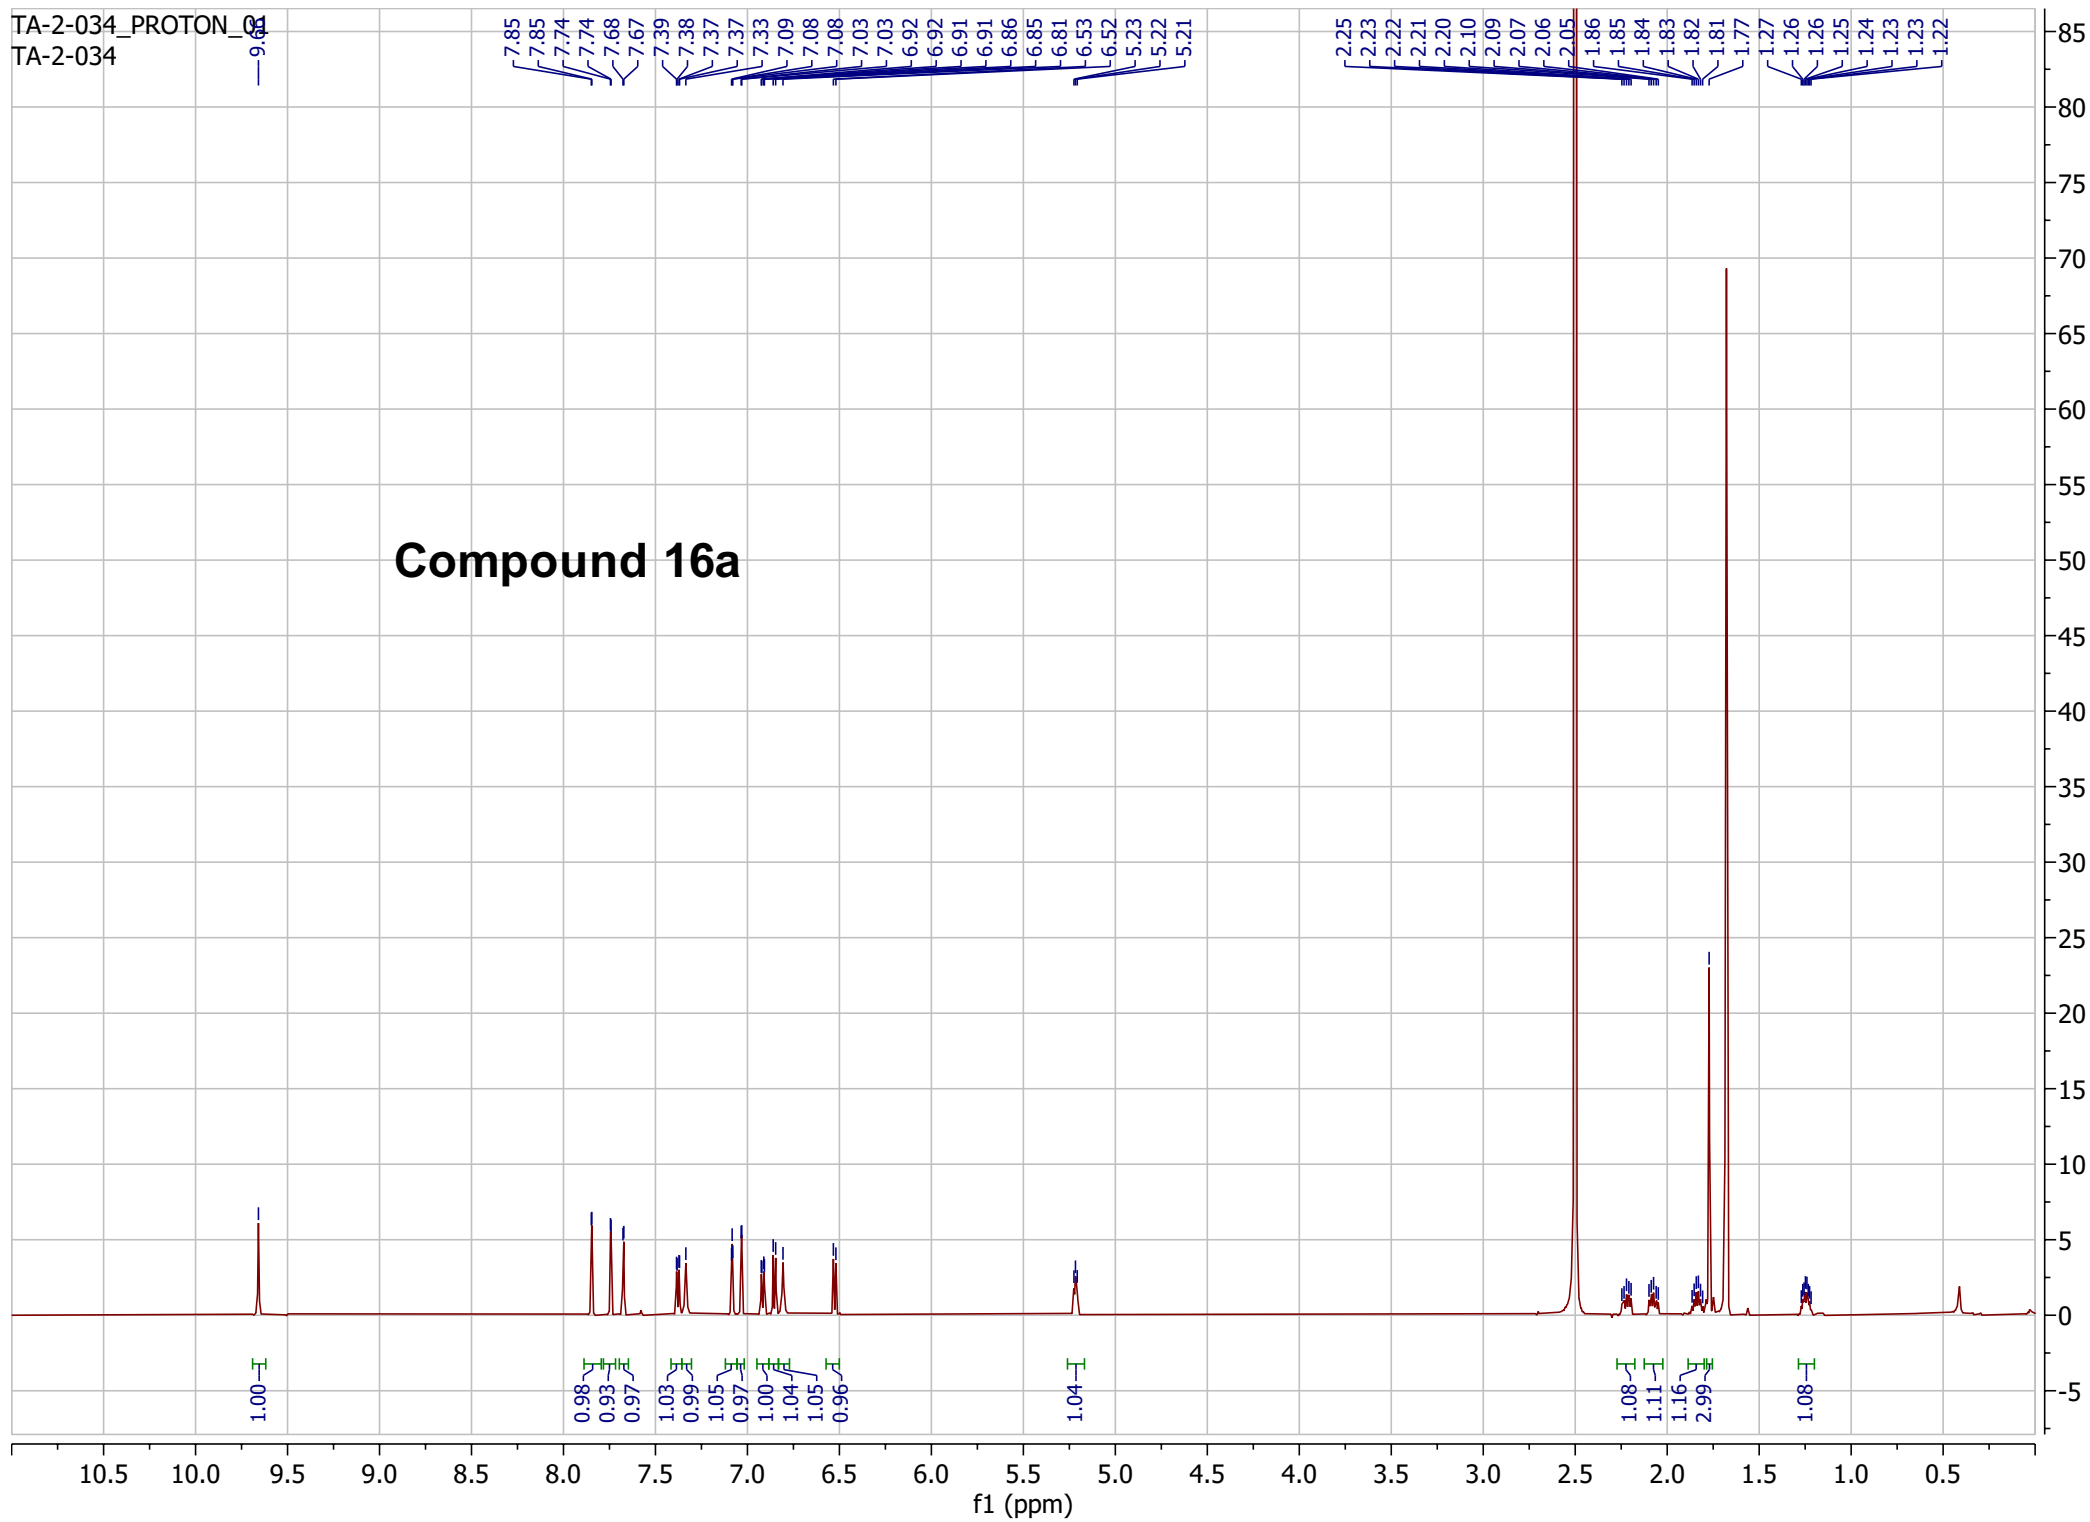

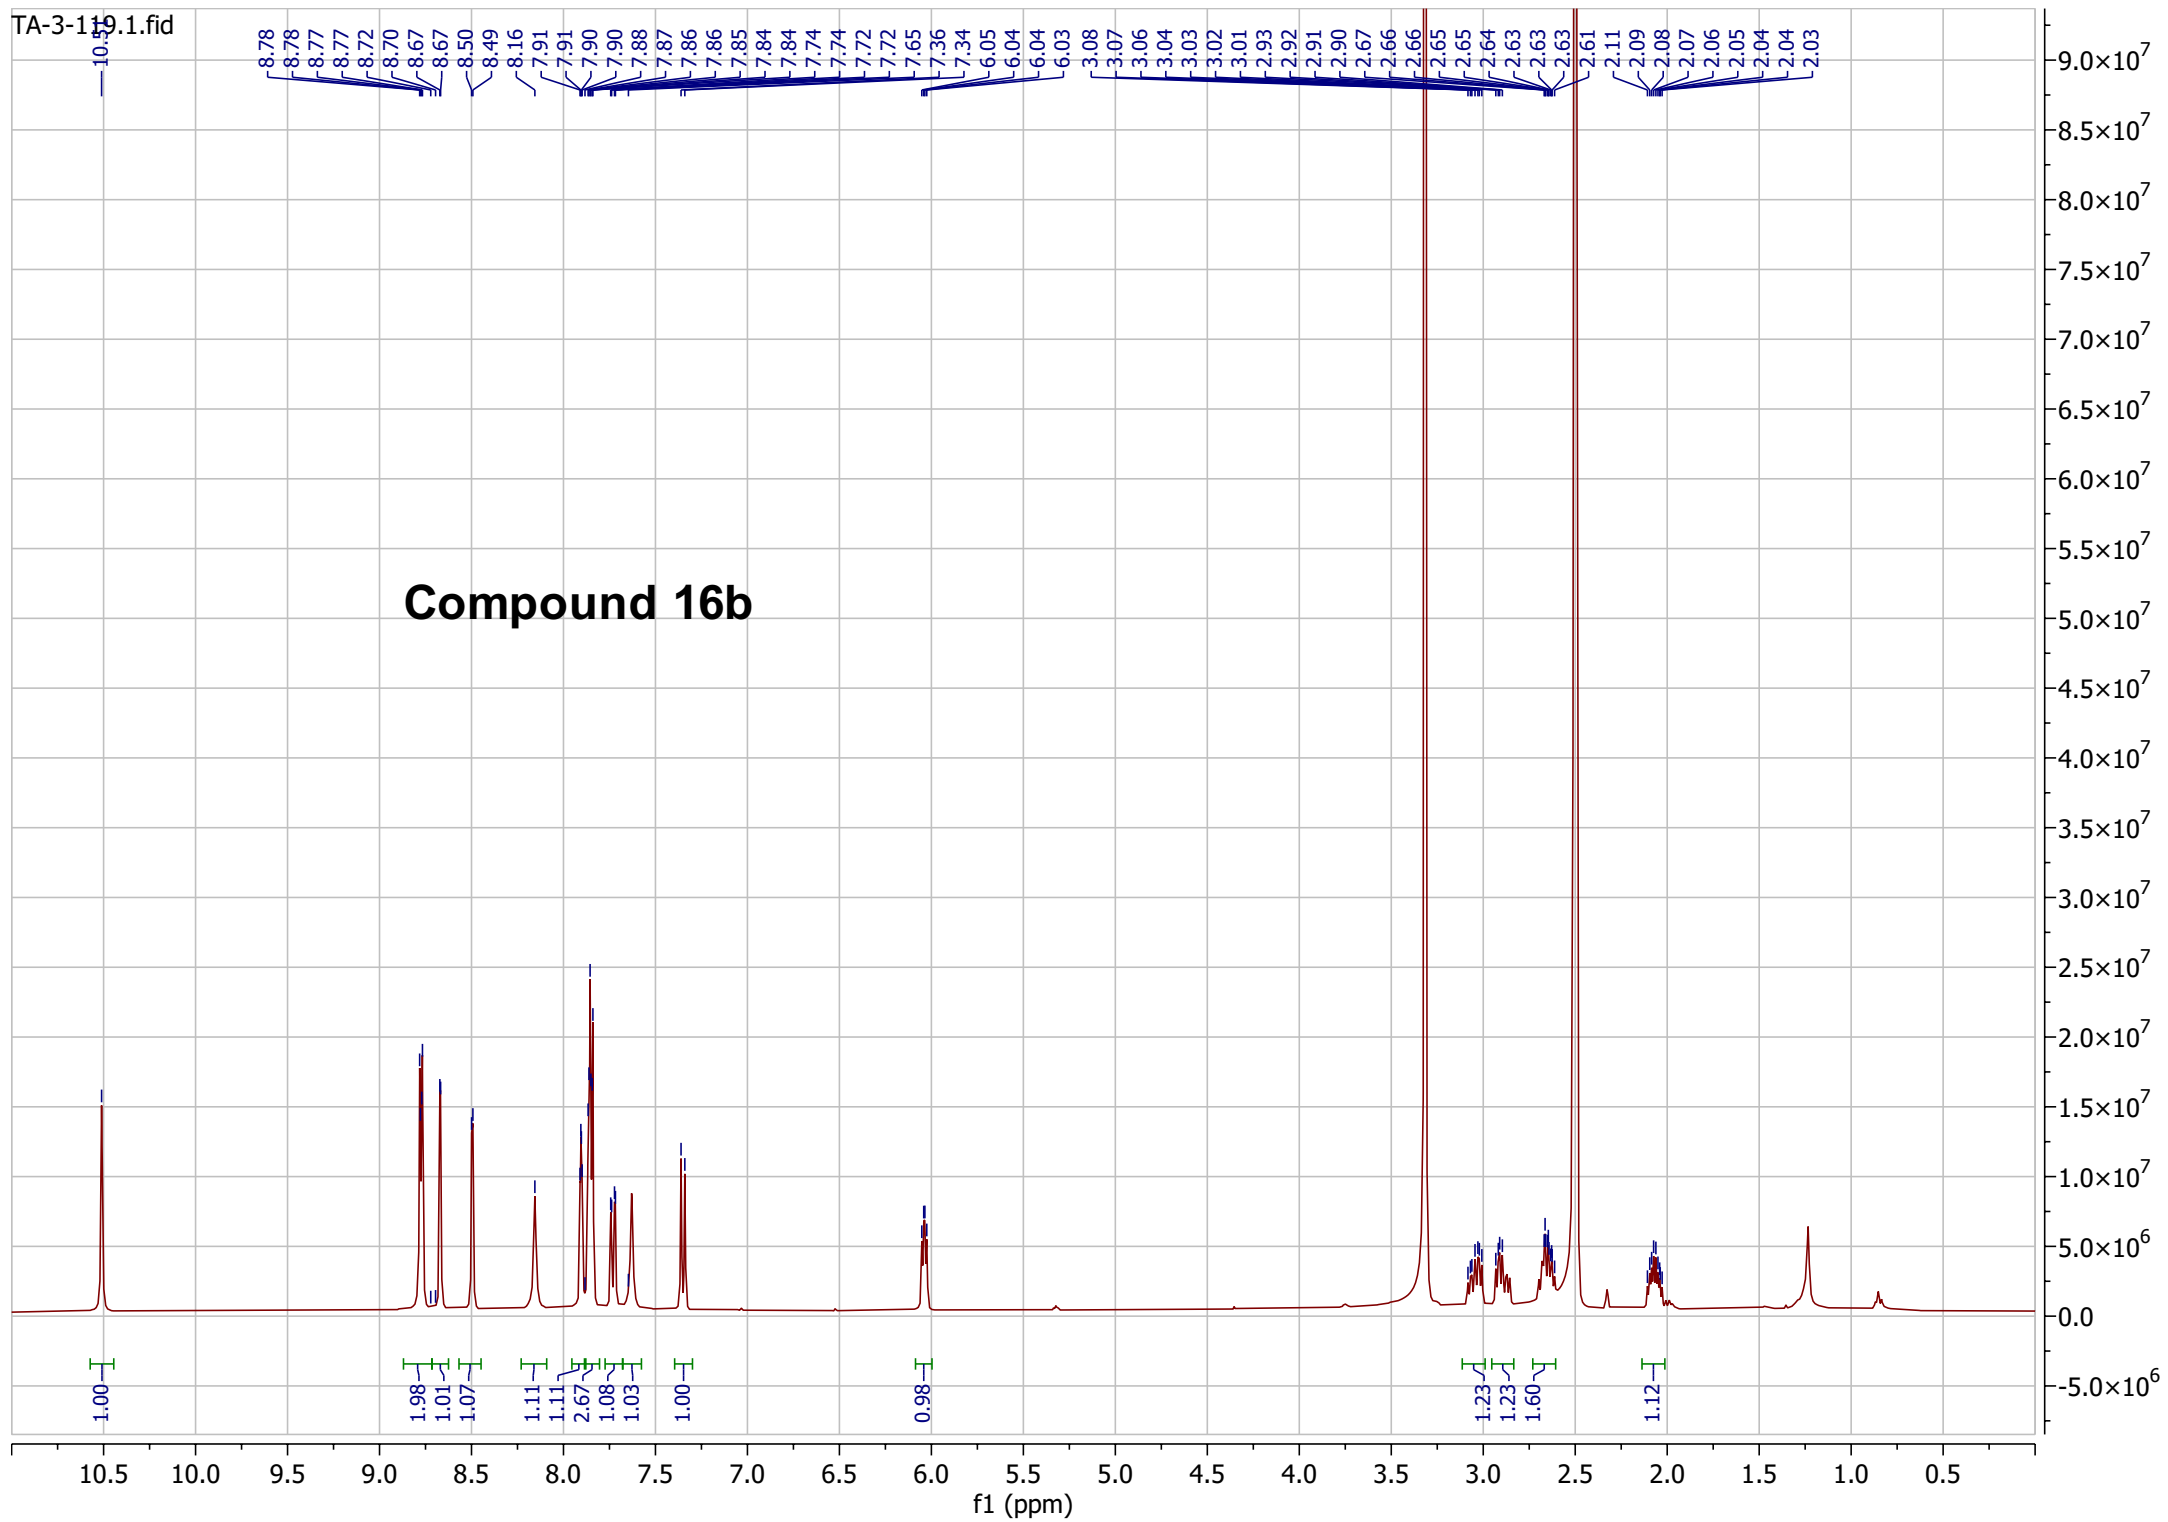

TA-3-042\_PROTON\_01  
TA-3-042

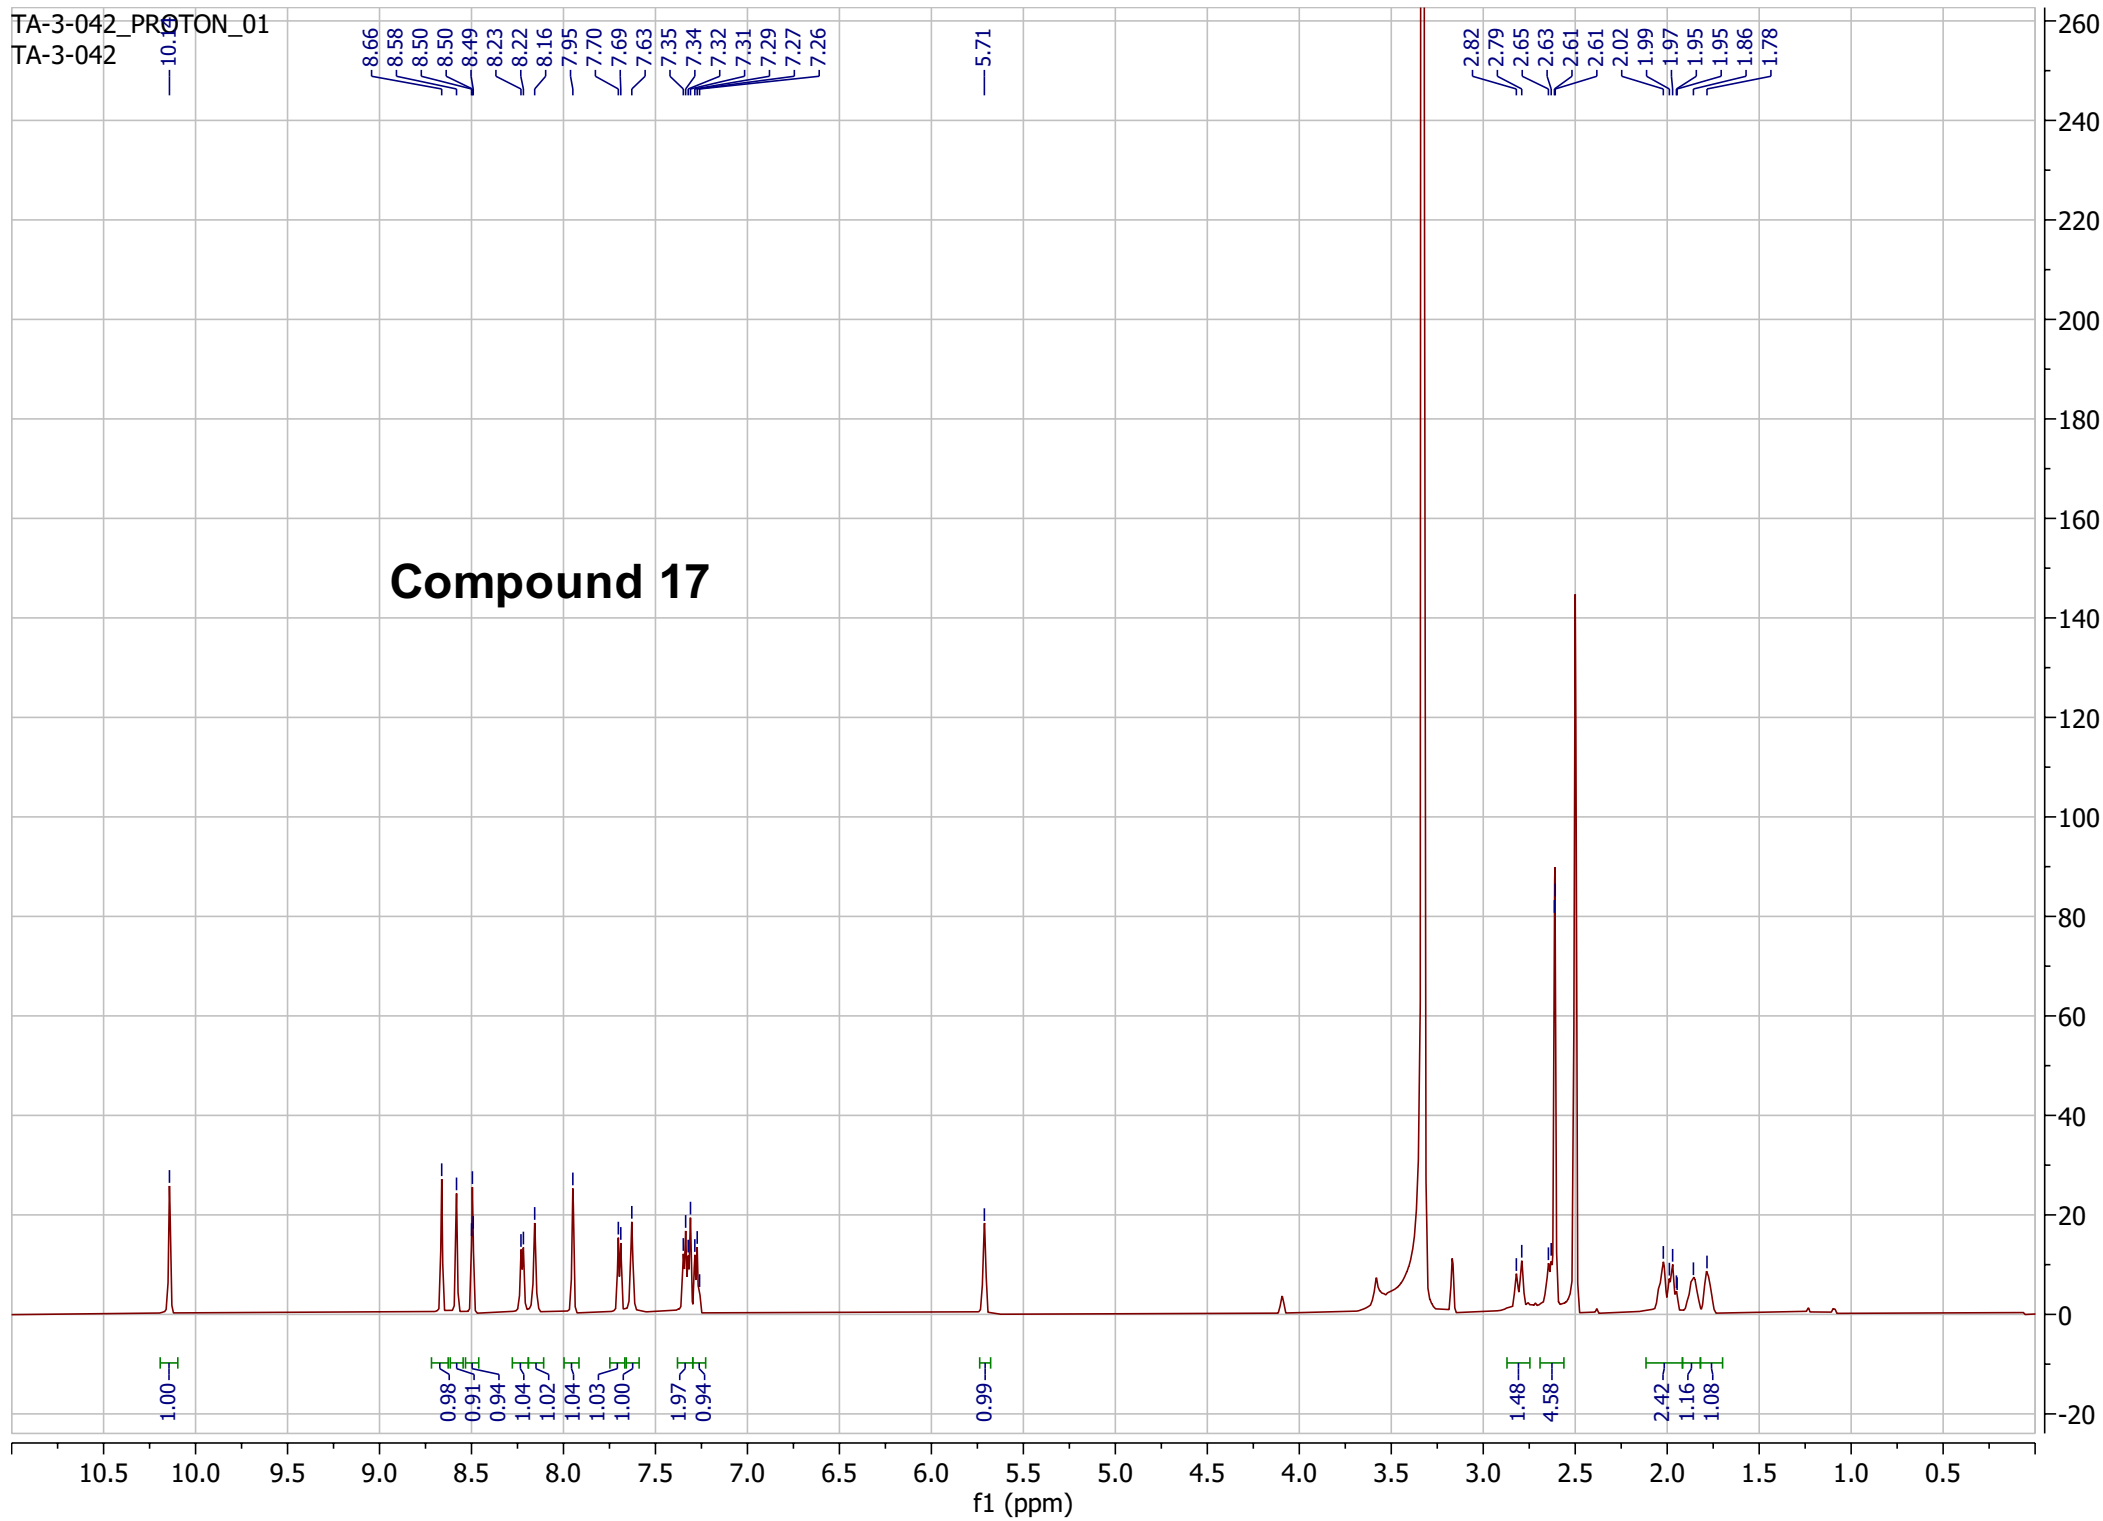

TA-3-037, PROTON\_01  
TA-3-037

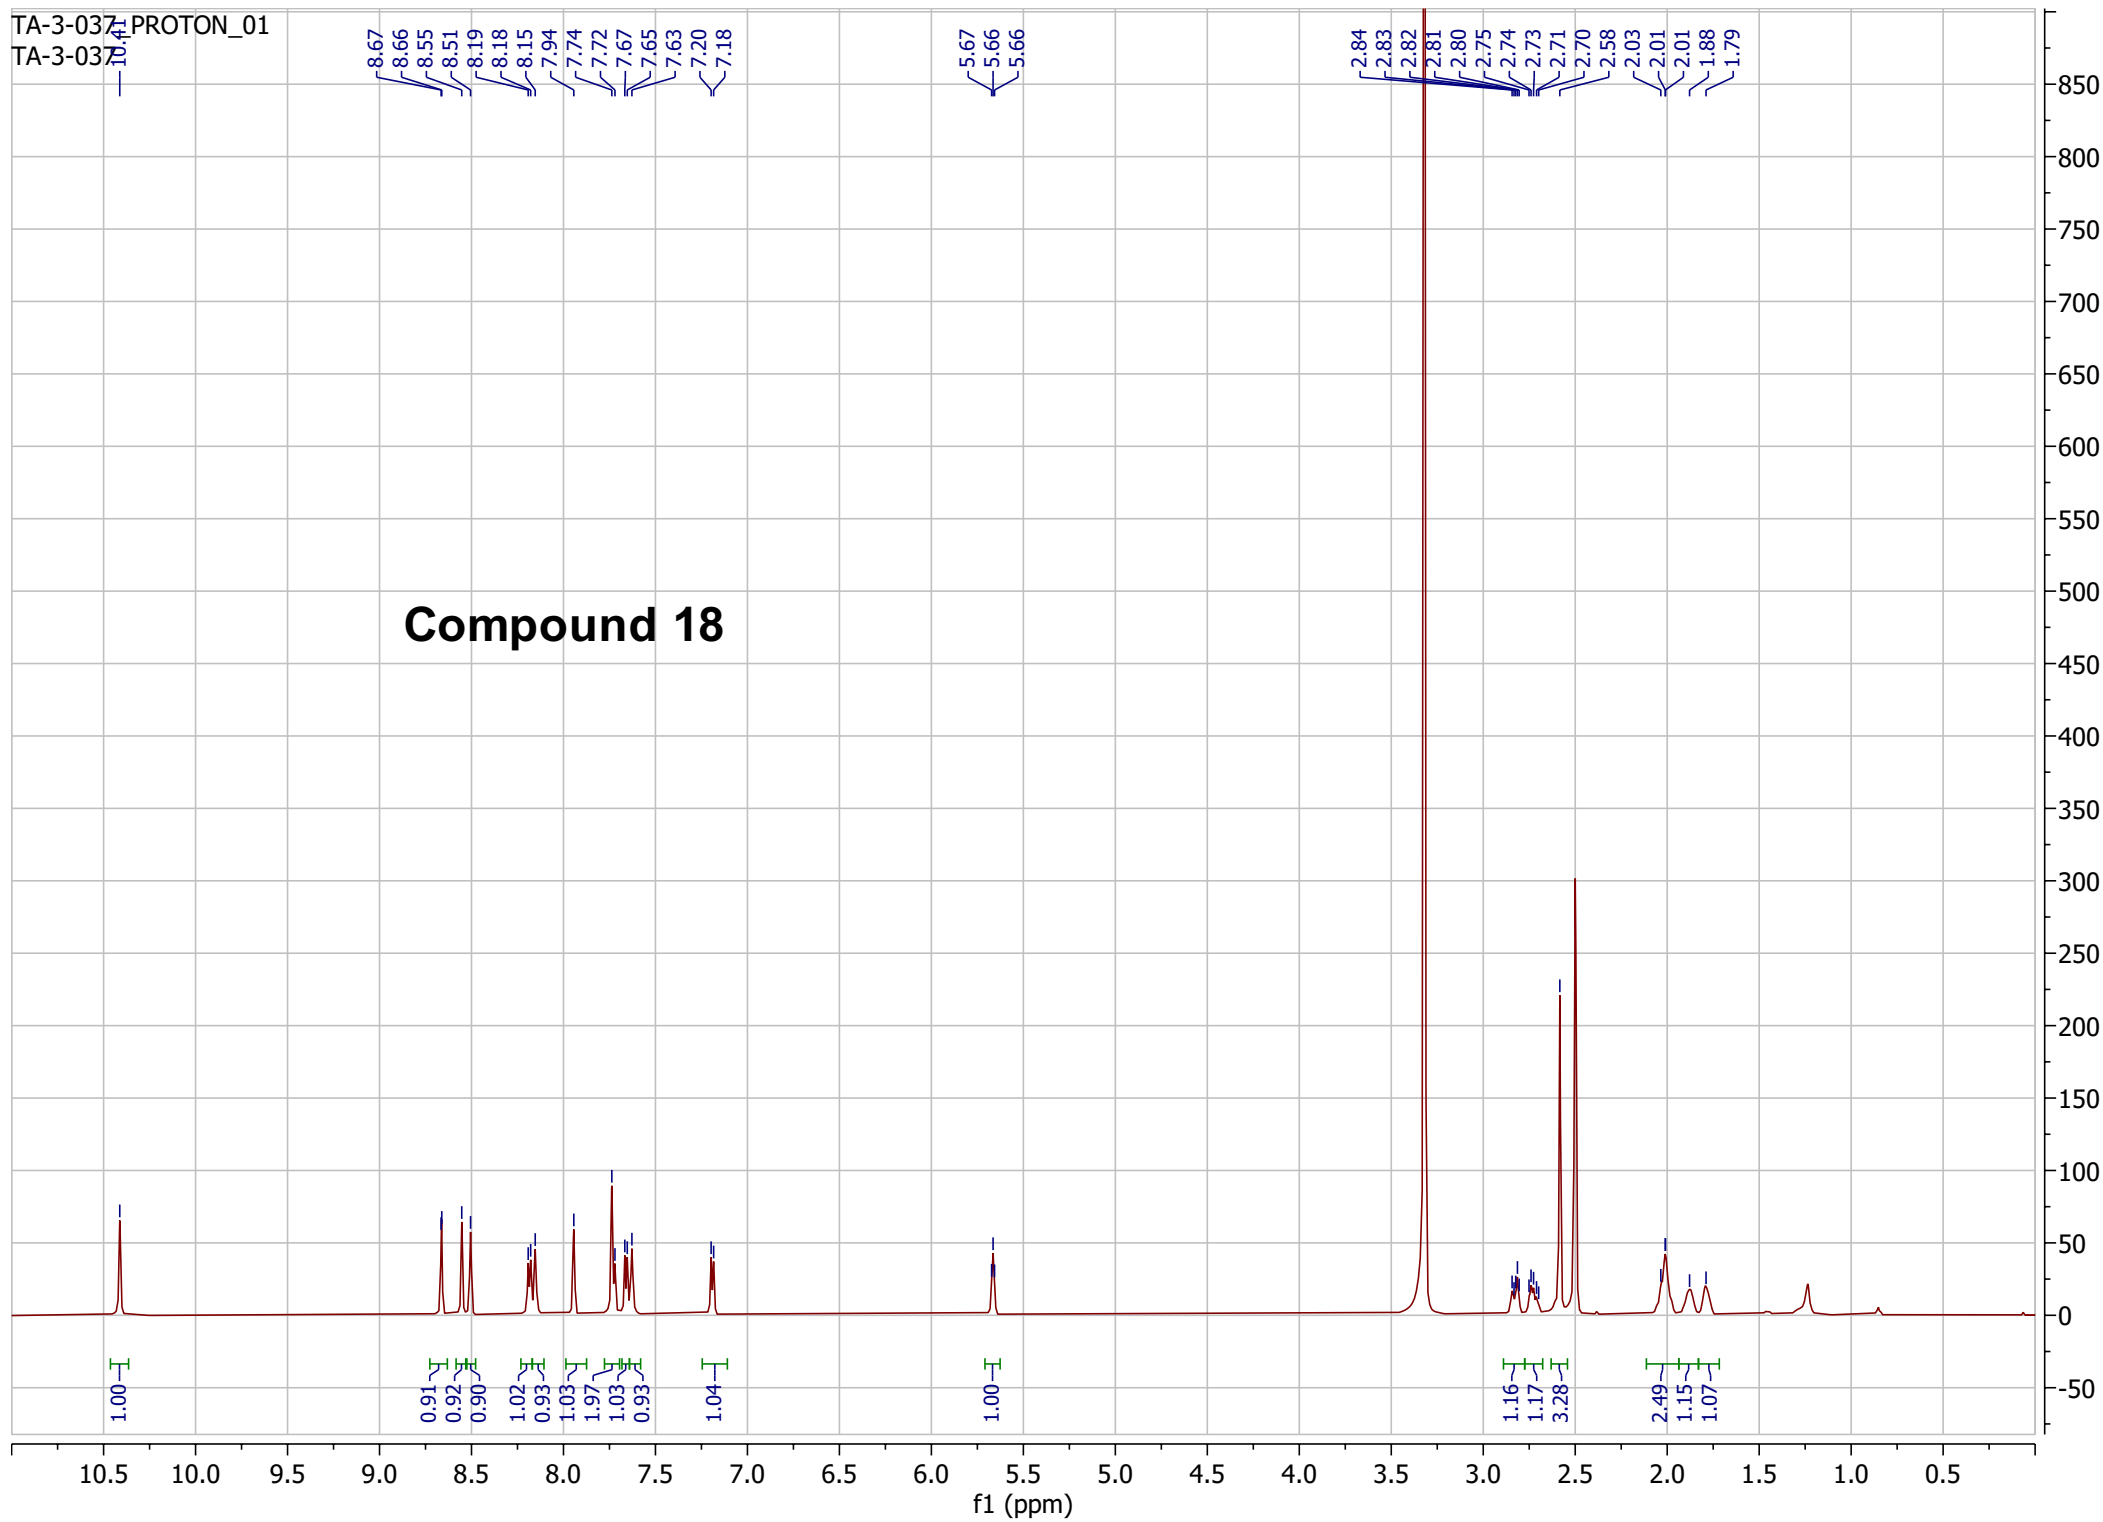

TA-3-150-PROTON\_01  
TA-3-150

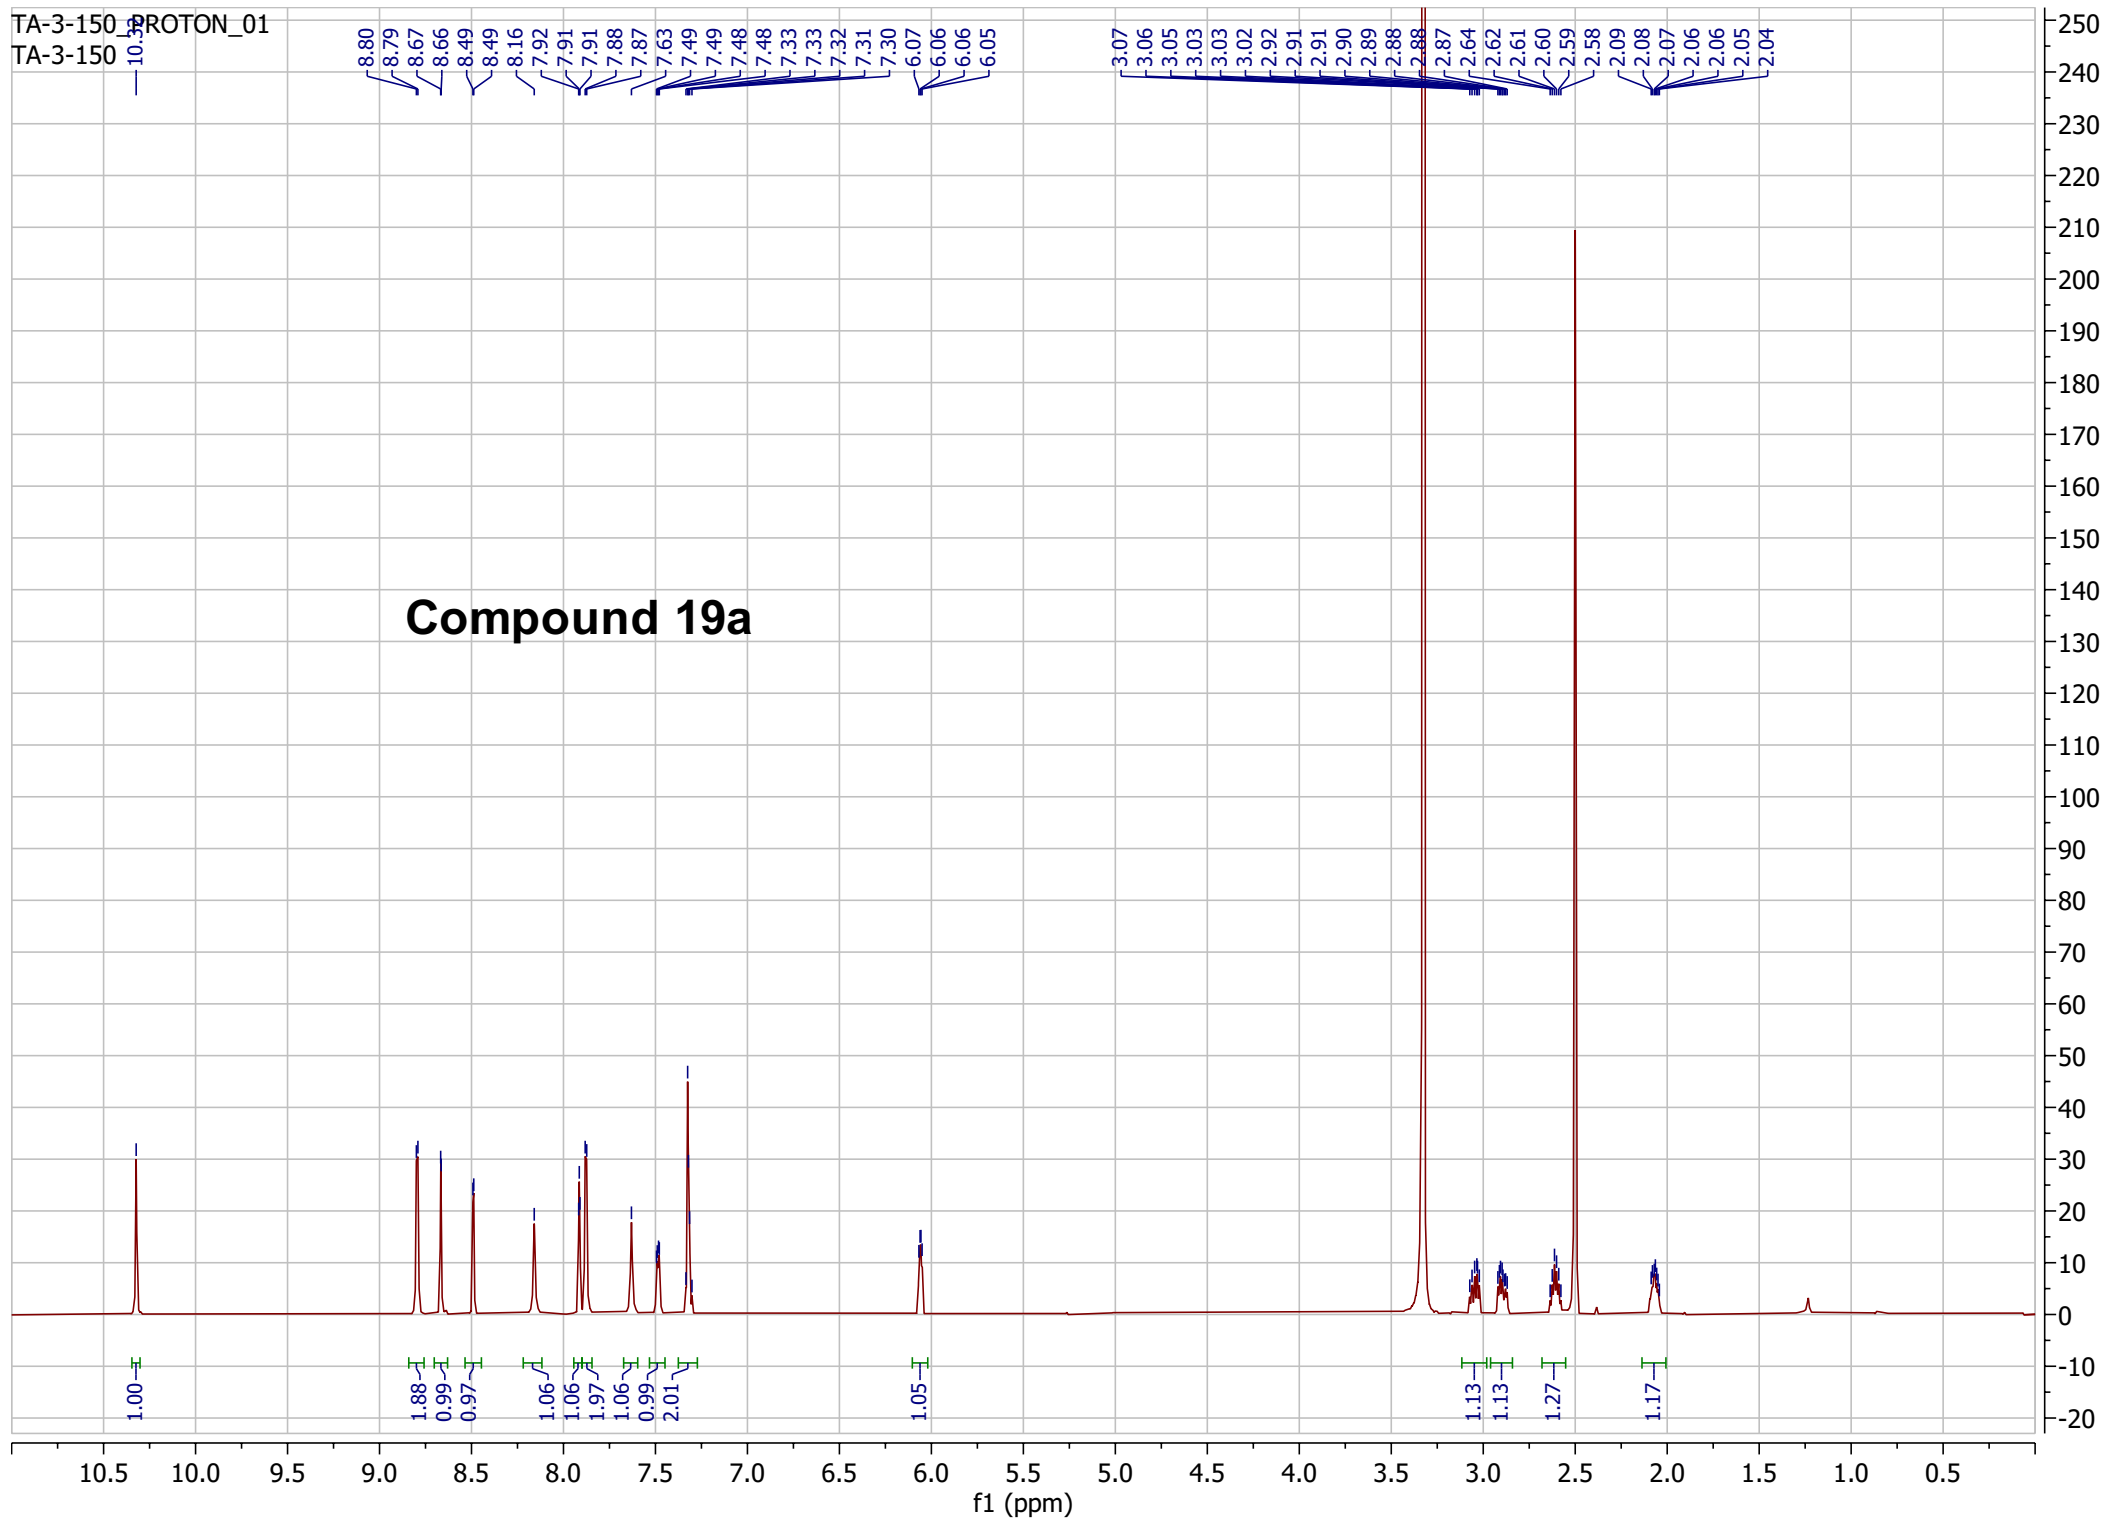



TA-3-151\_PROTON\_01  
TA-3-151

# Compound 19b

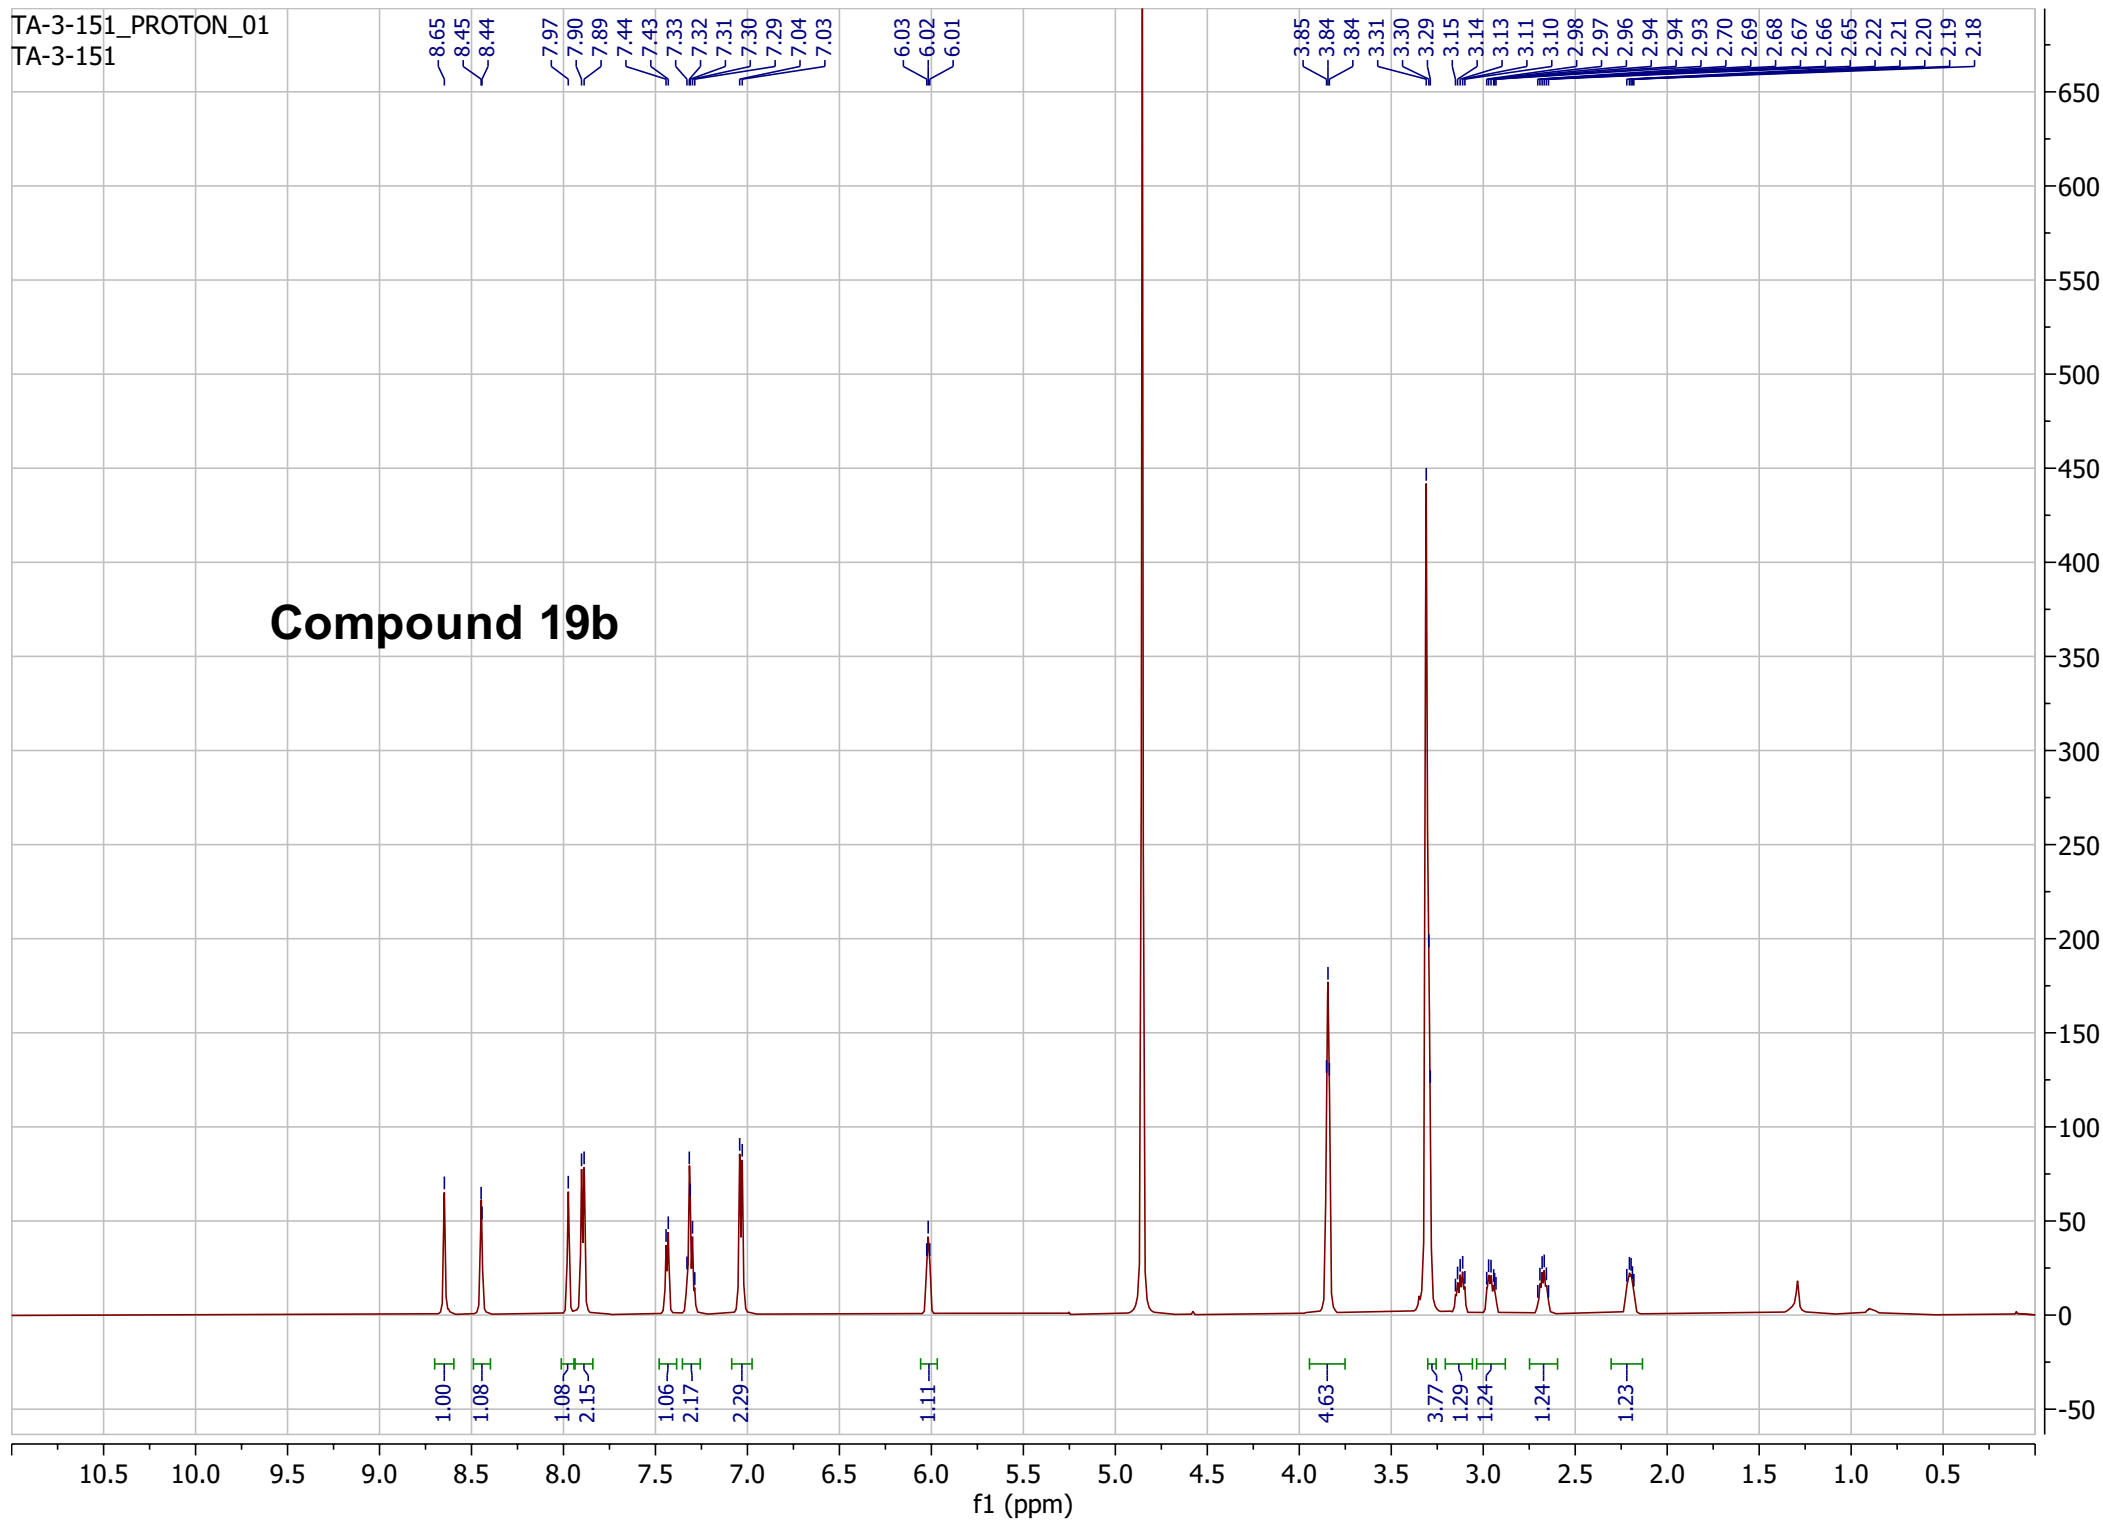

TA-3-163\_PROTON\_01  
TA-3-163

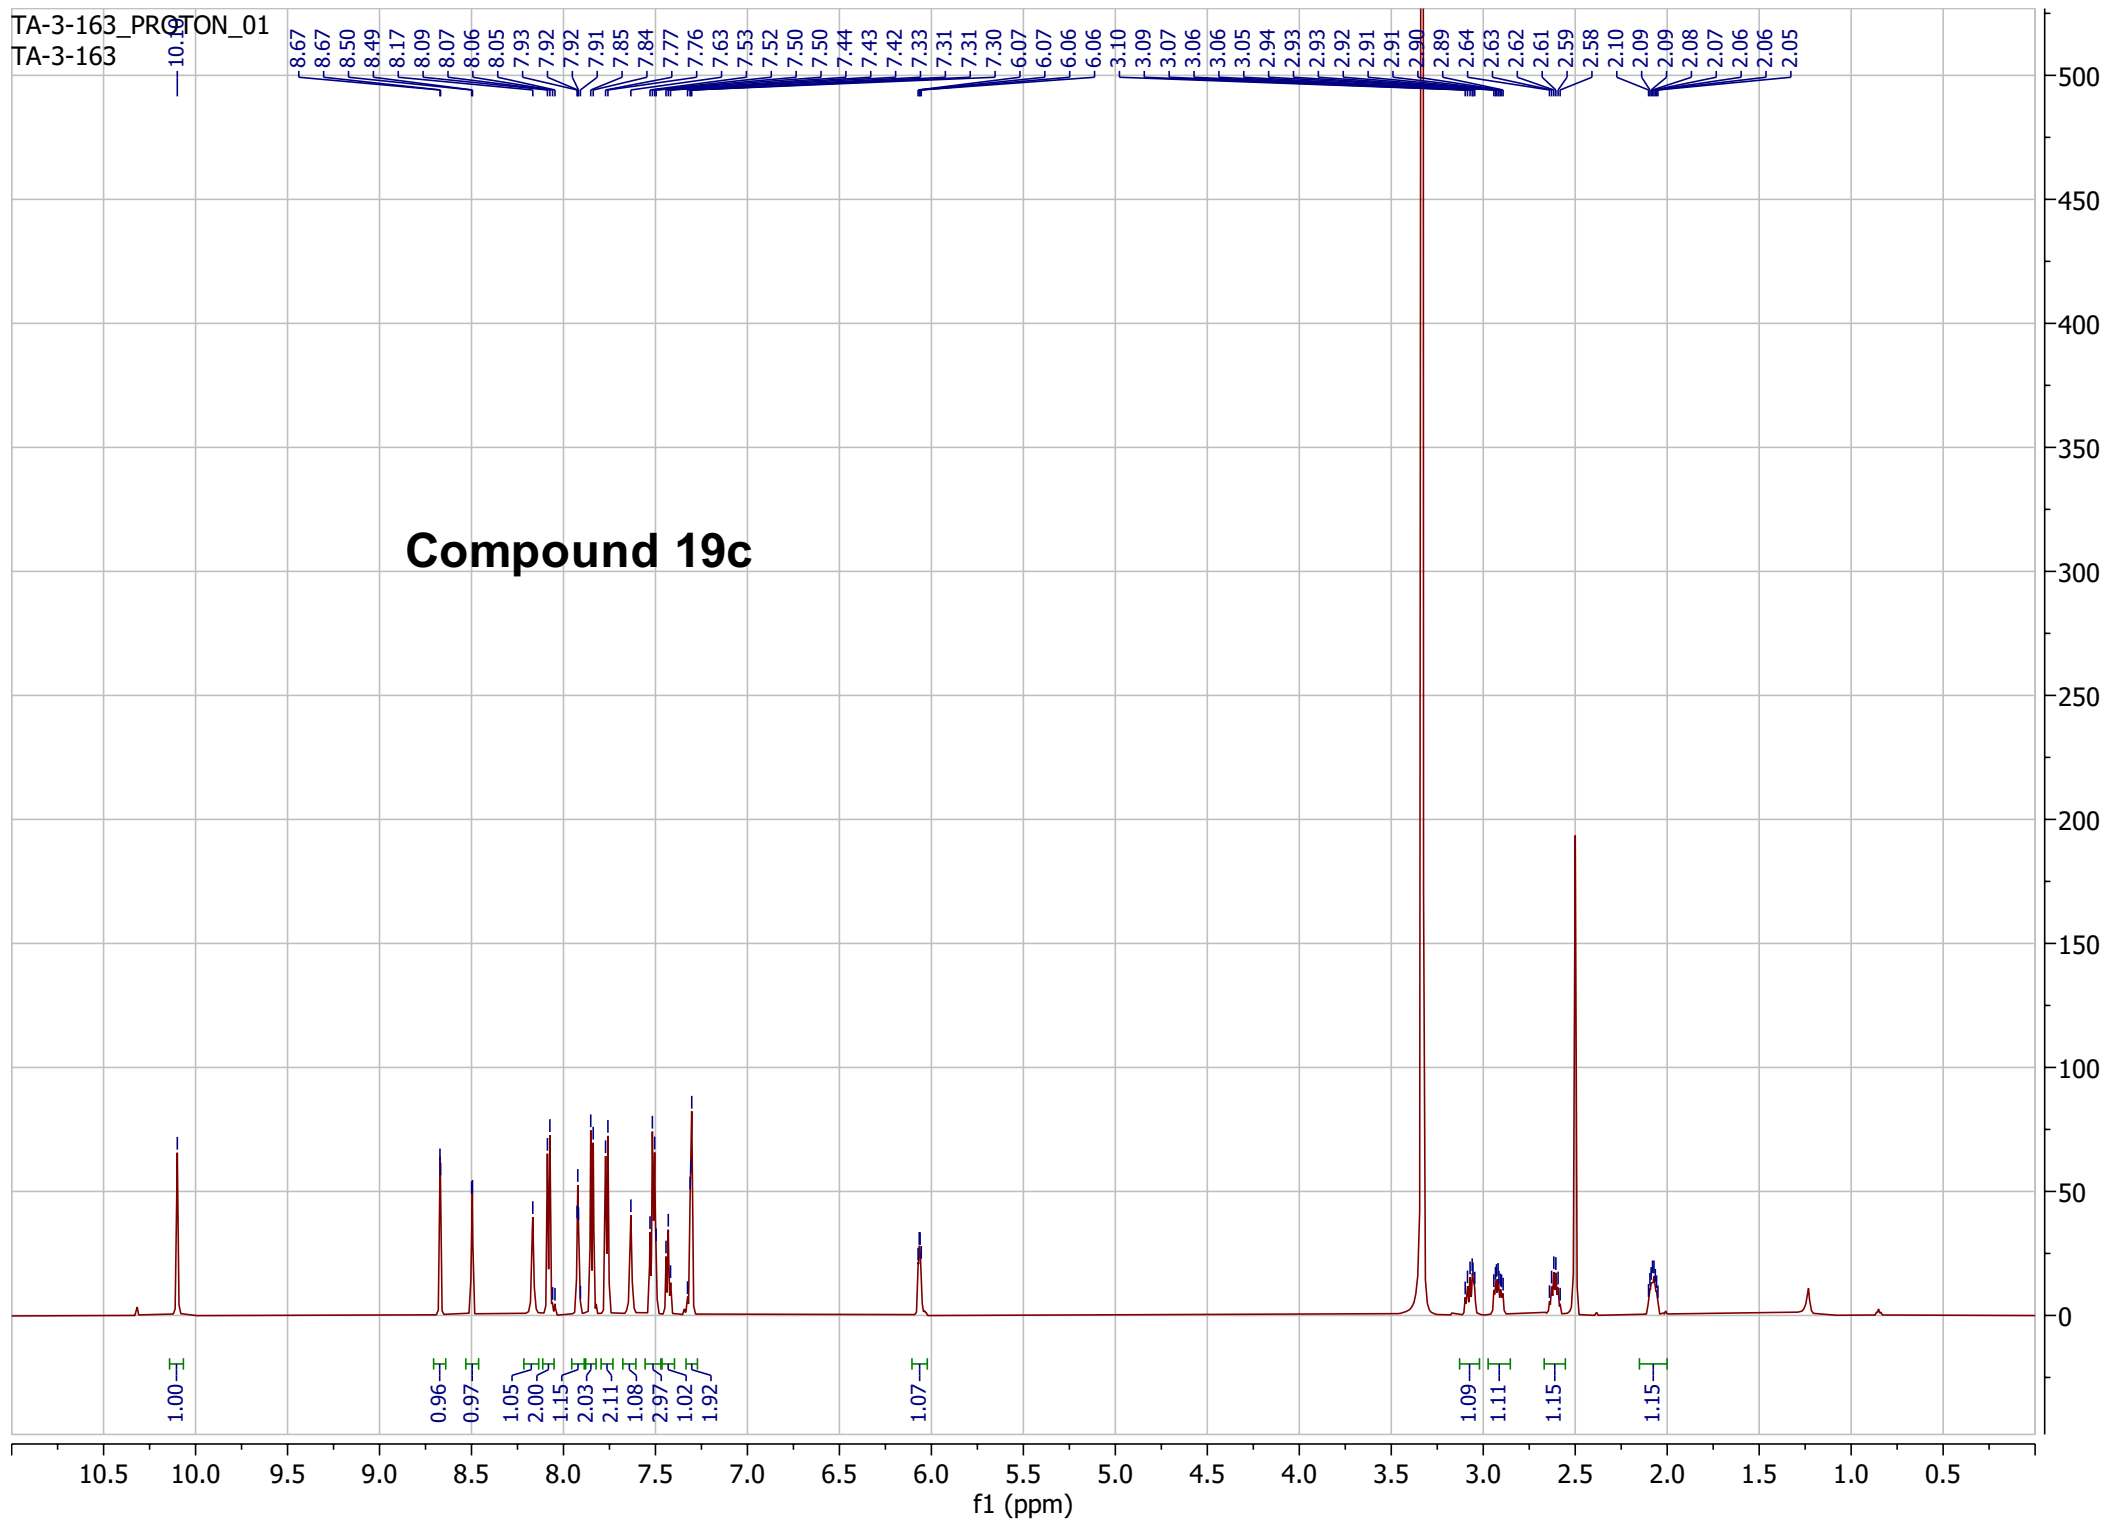

TA-3-152-PROTON\_01  
TA-3-152

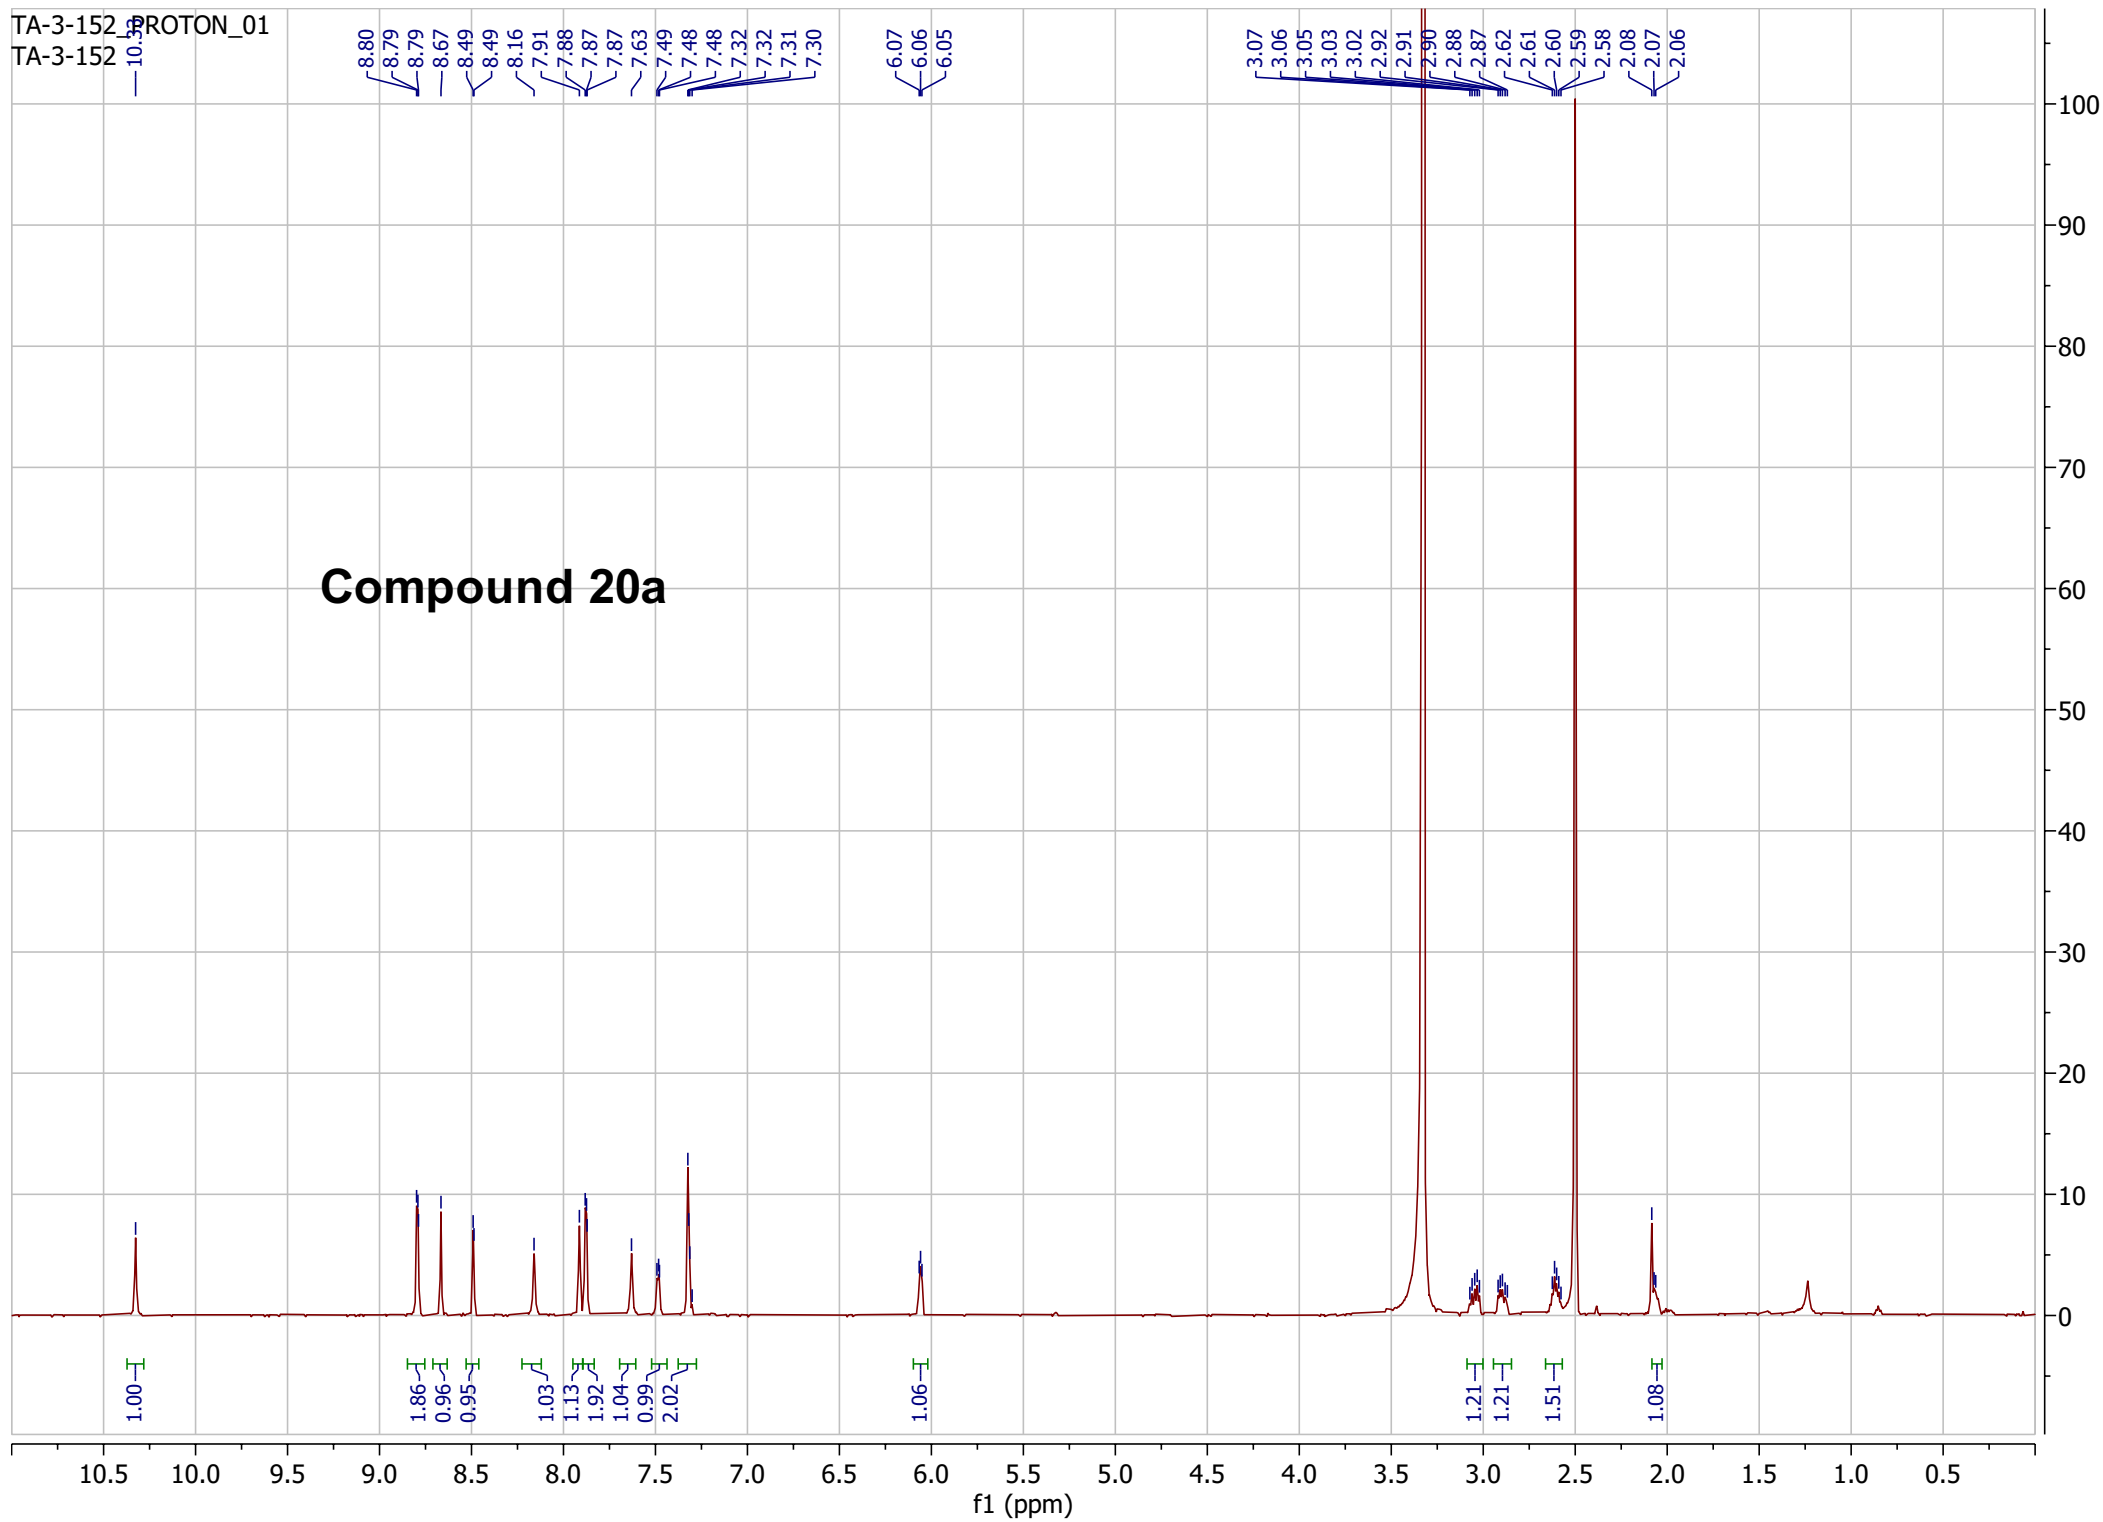

TA-3-153\_PROTON\_501  
TA-3-153

# Compound 20b

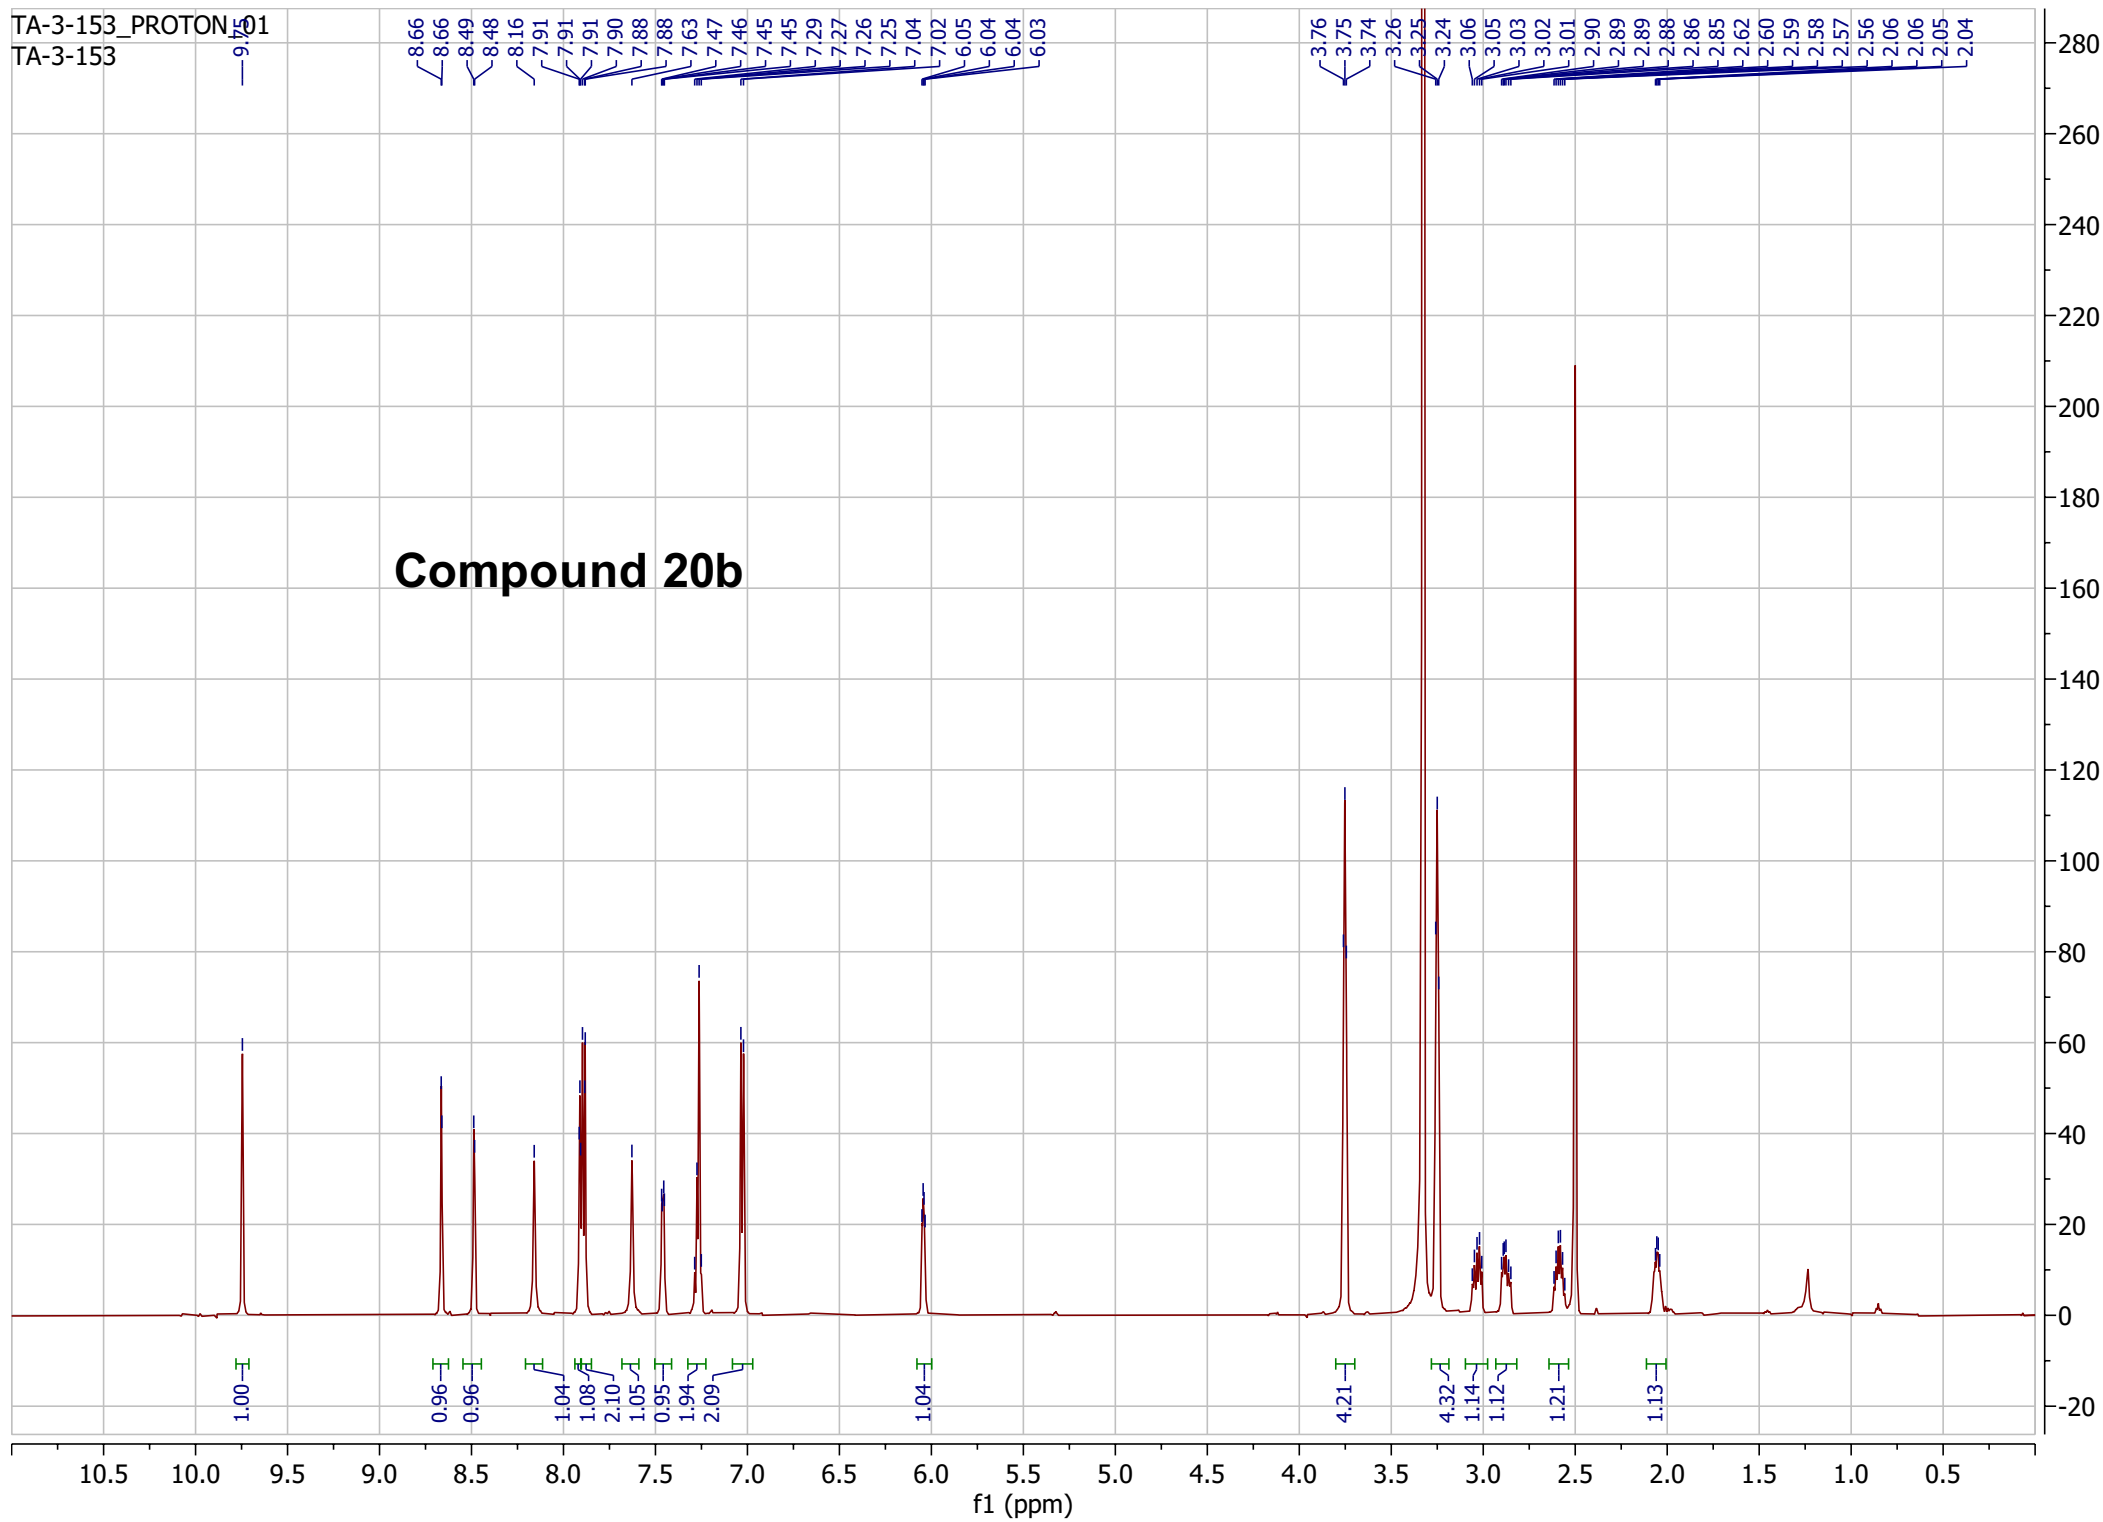

# Compound 20c

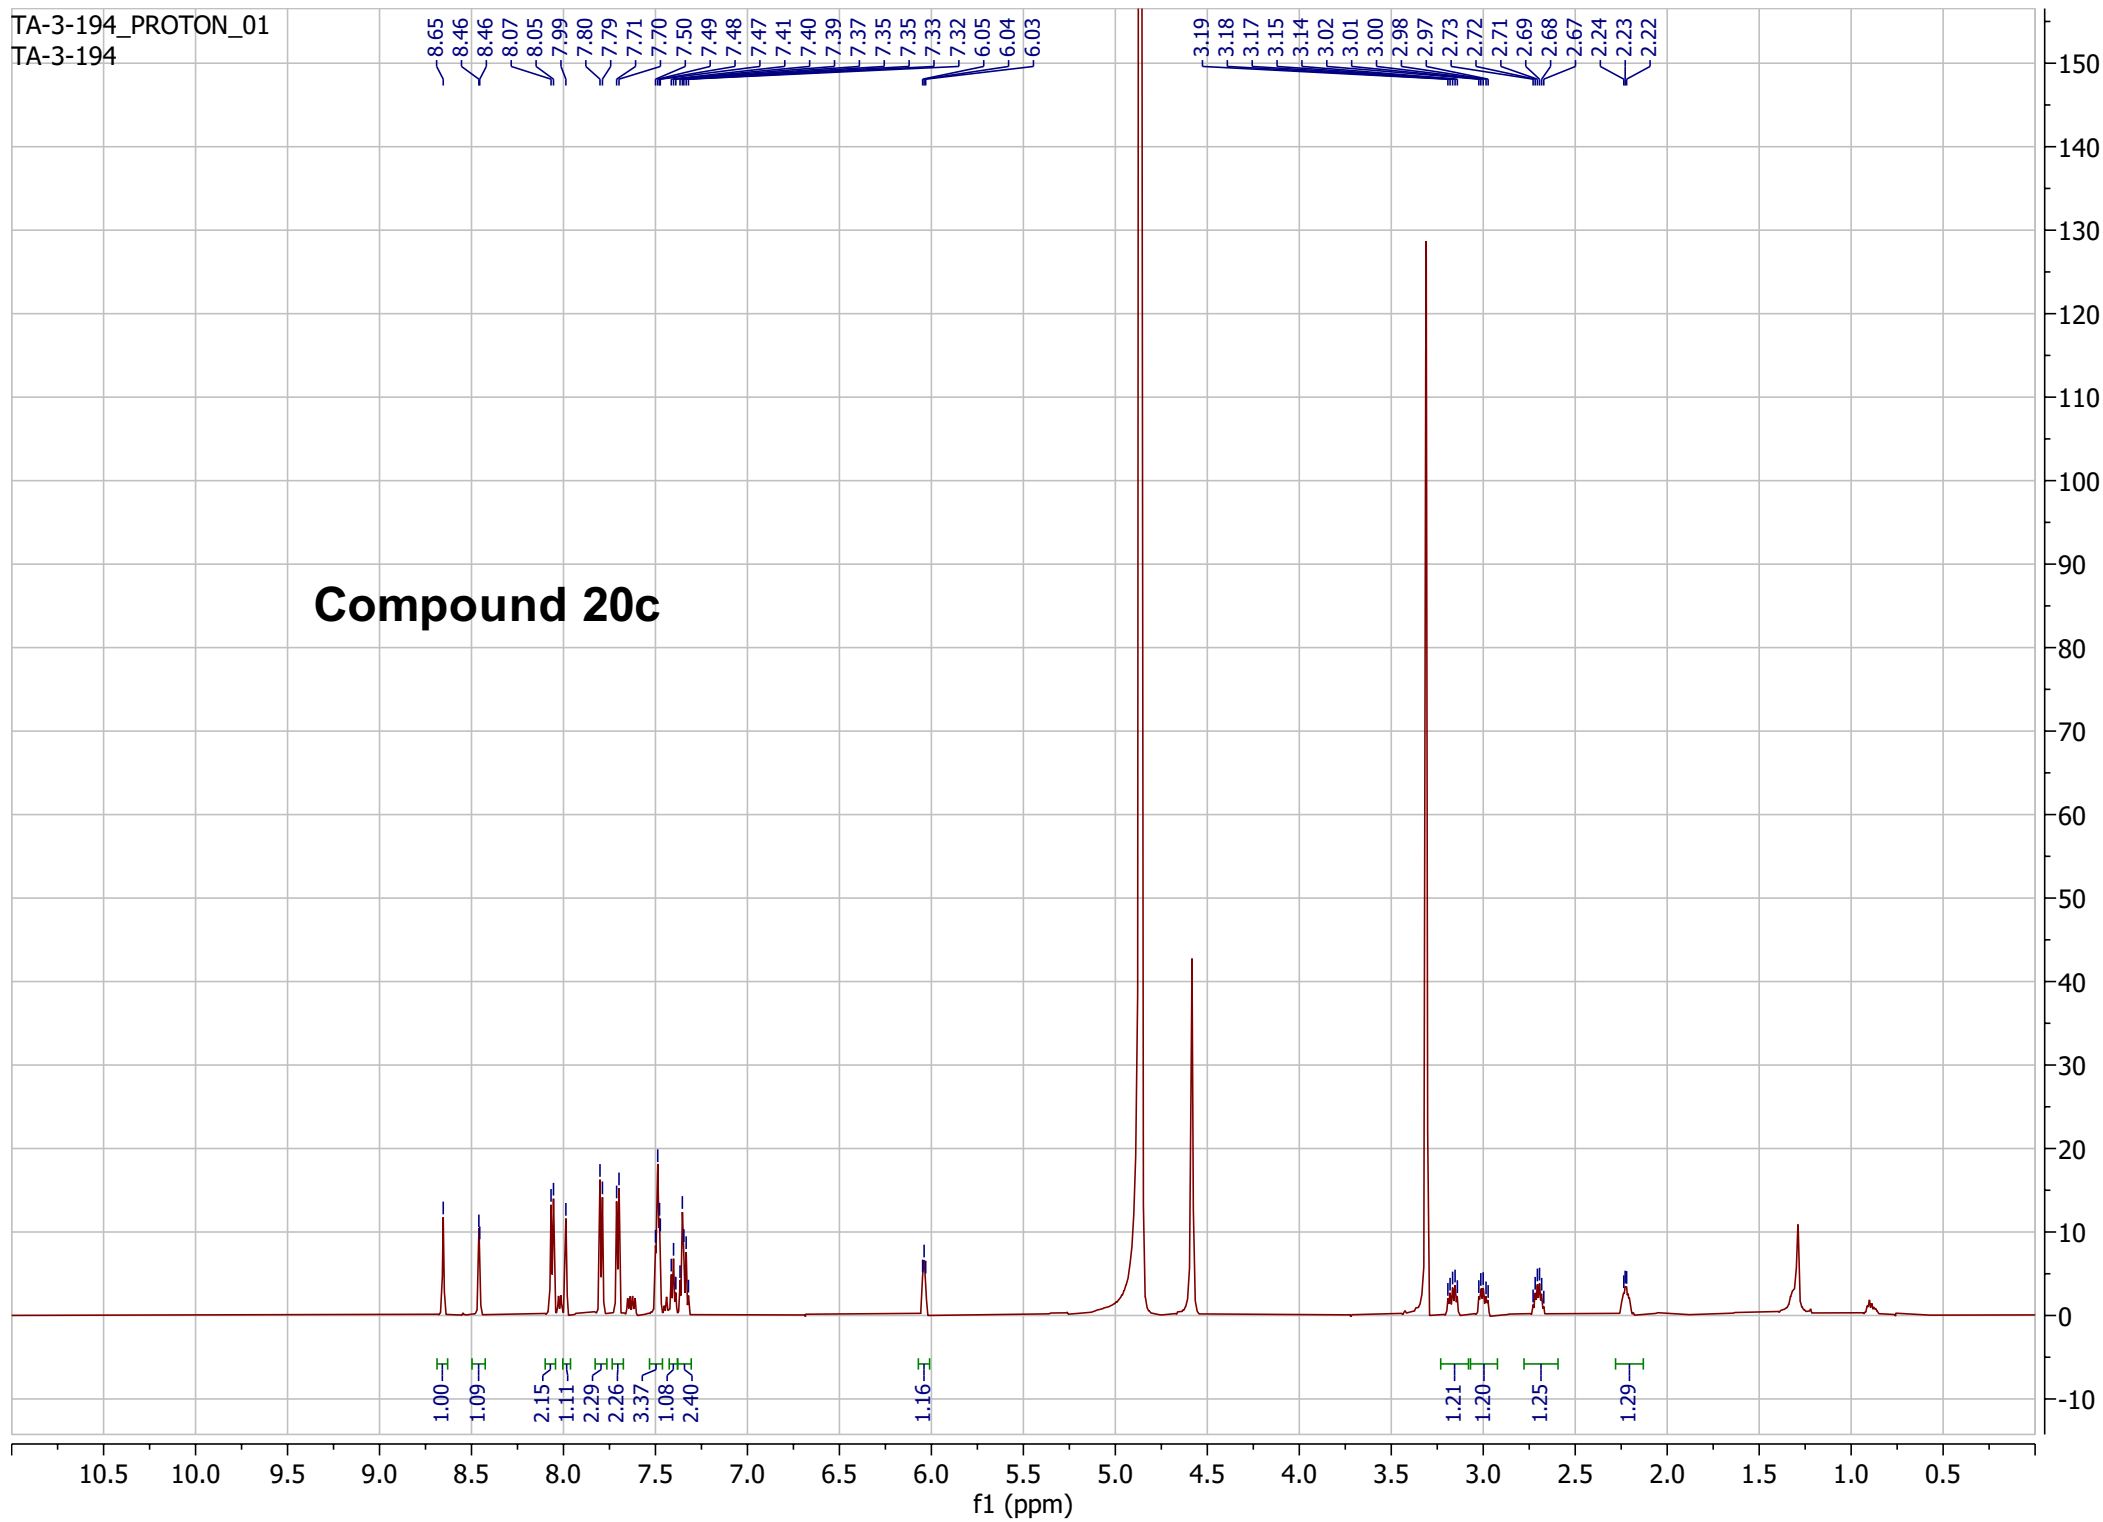

TA-3-165\_PROTON\_01  
TA-3-165

# Compound 21a

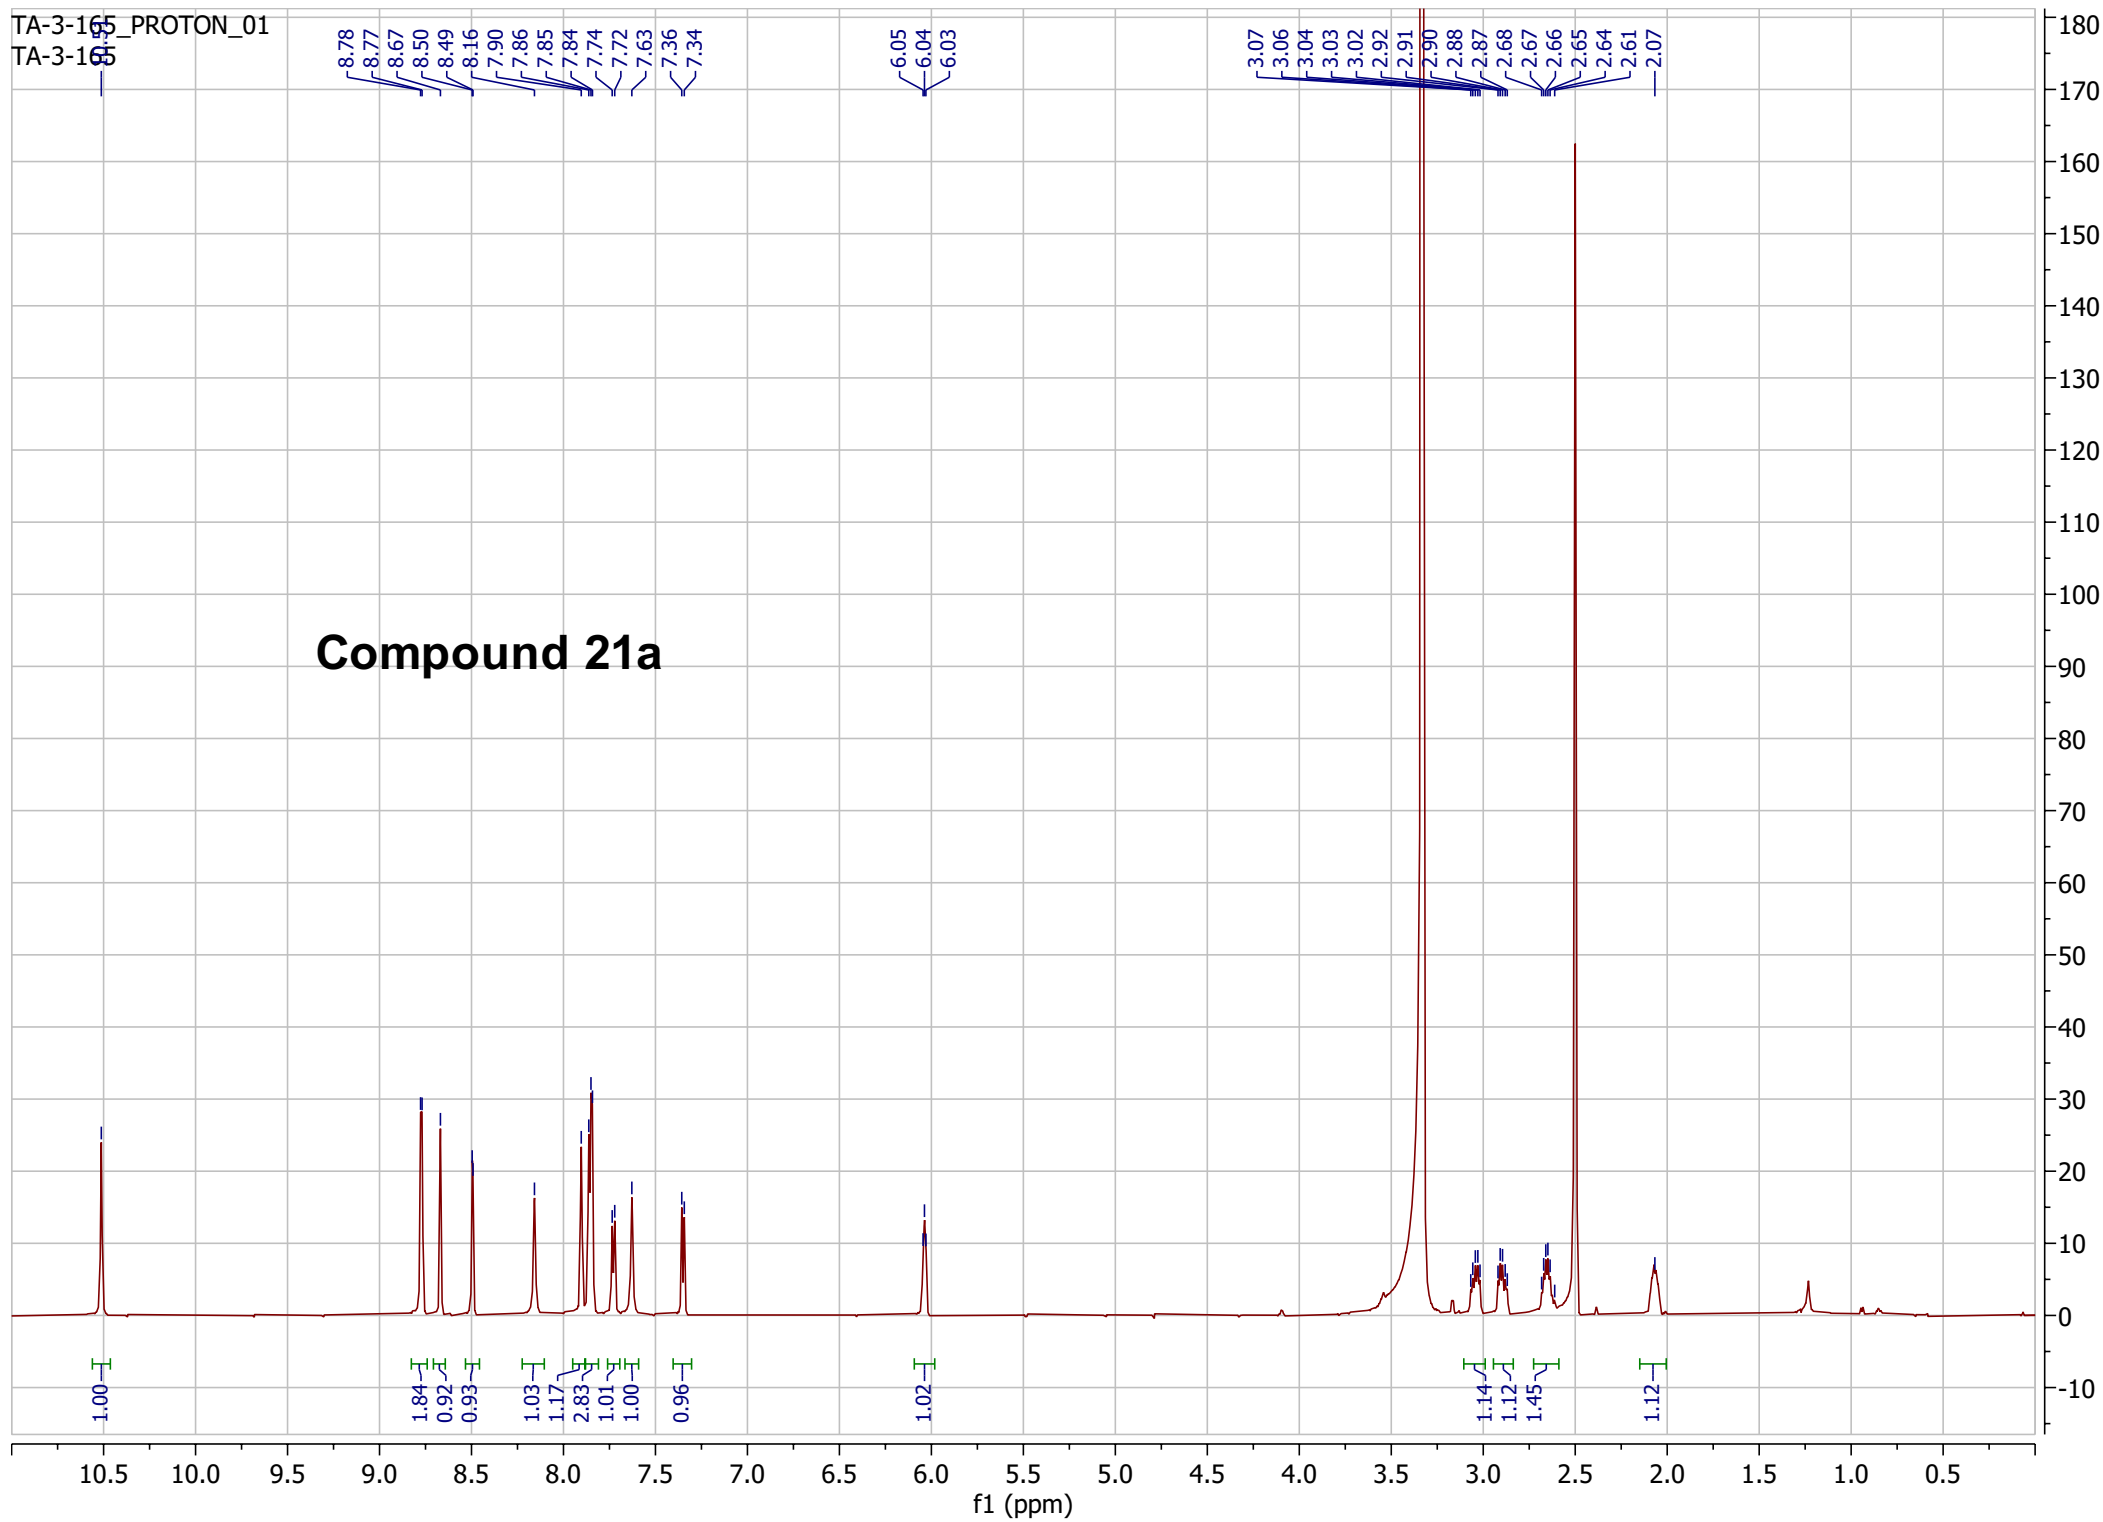

TA-3-166\_PROTON\_01  
TA-3-166

# Compound 21b

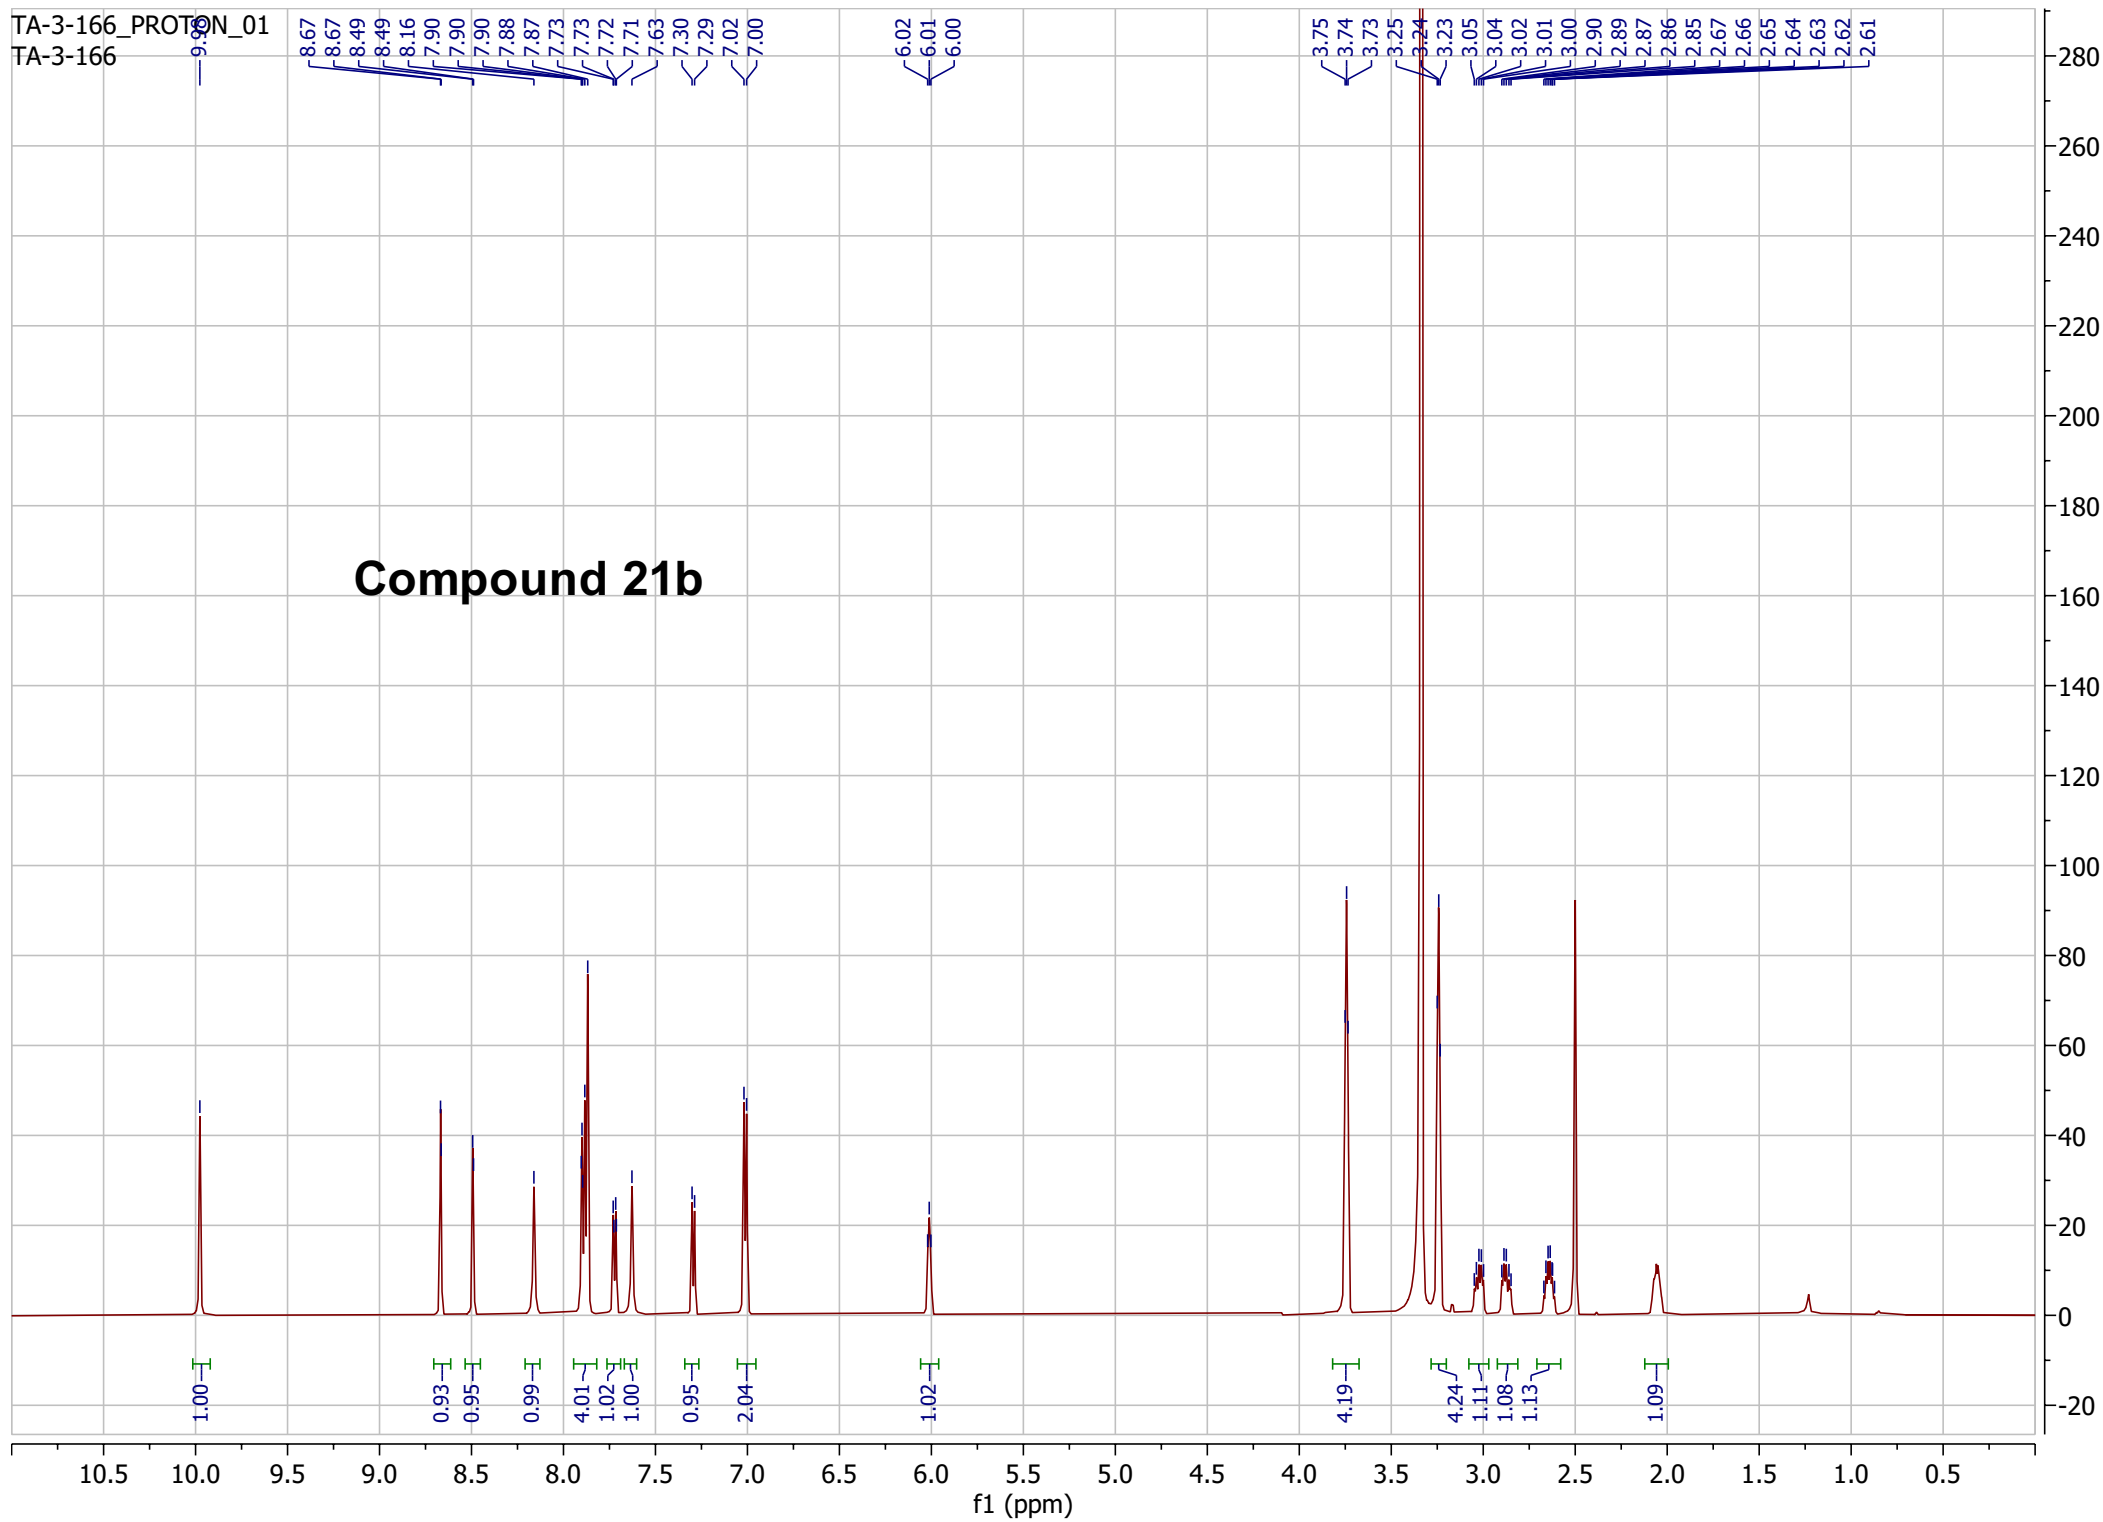

TA-3-164-PROTON\_01  
TA-3-164

# Compound 21c

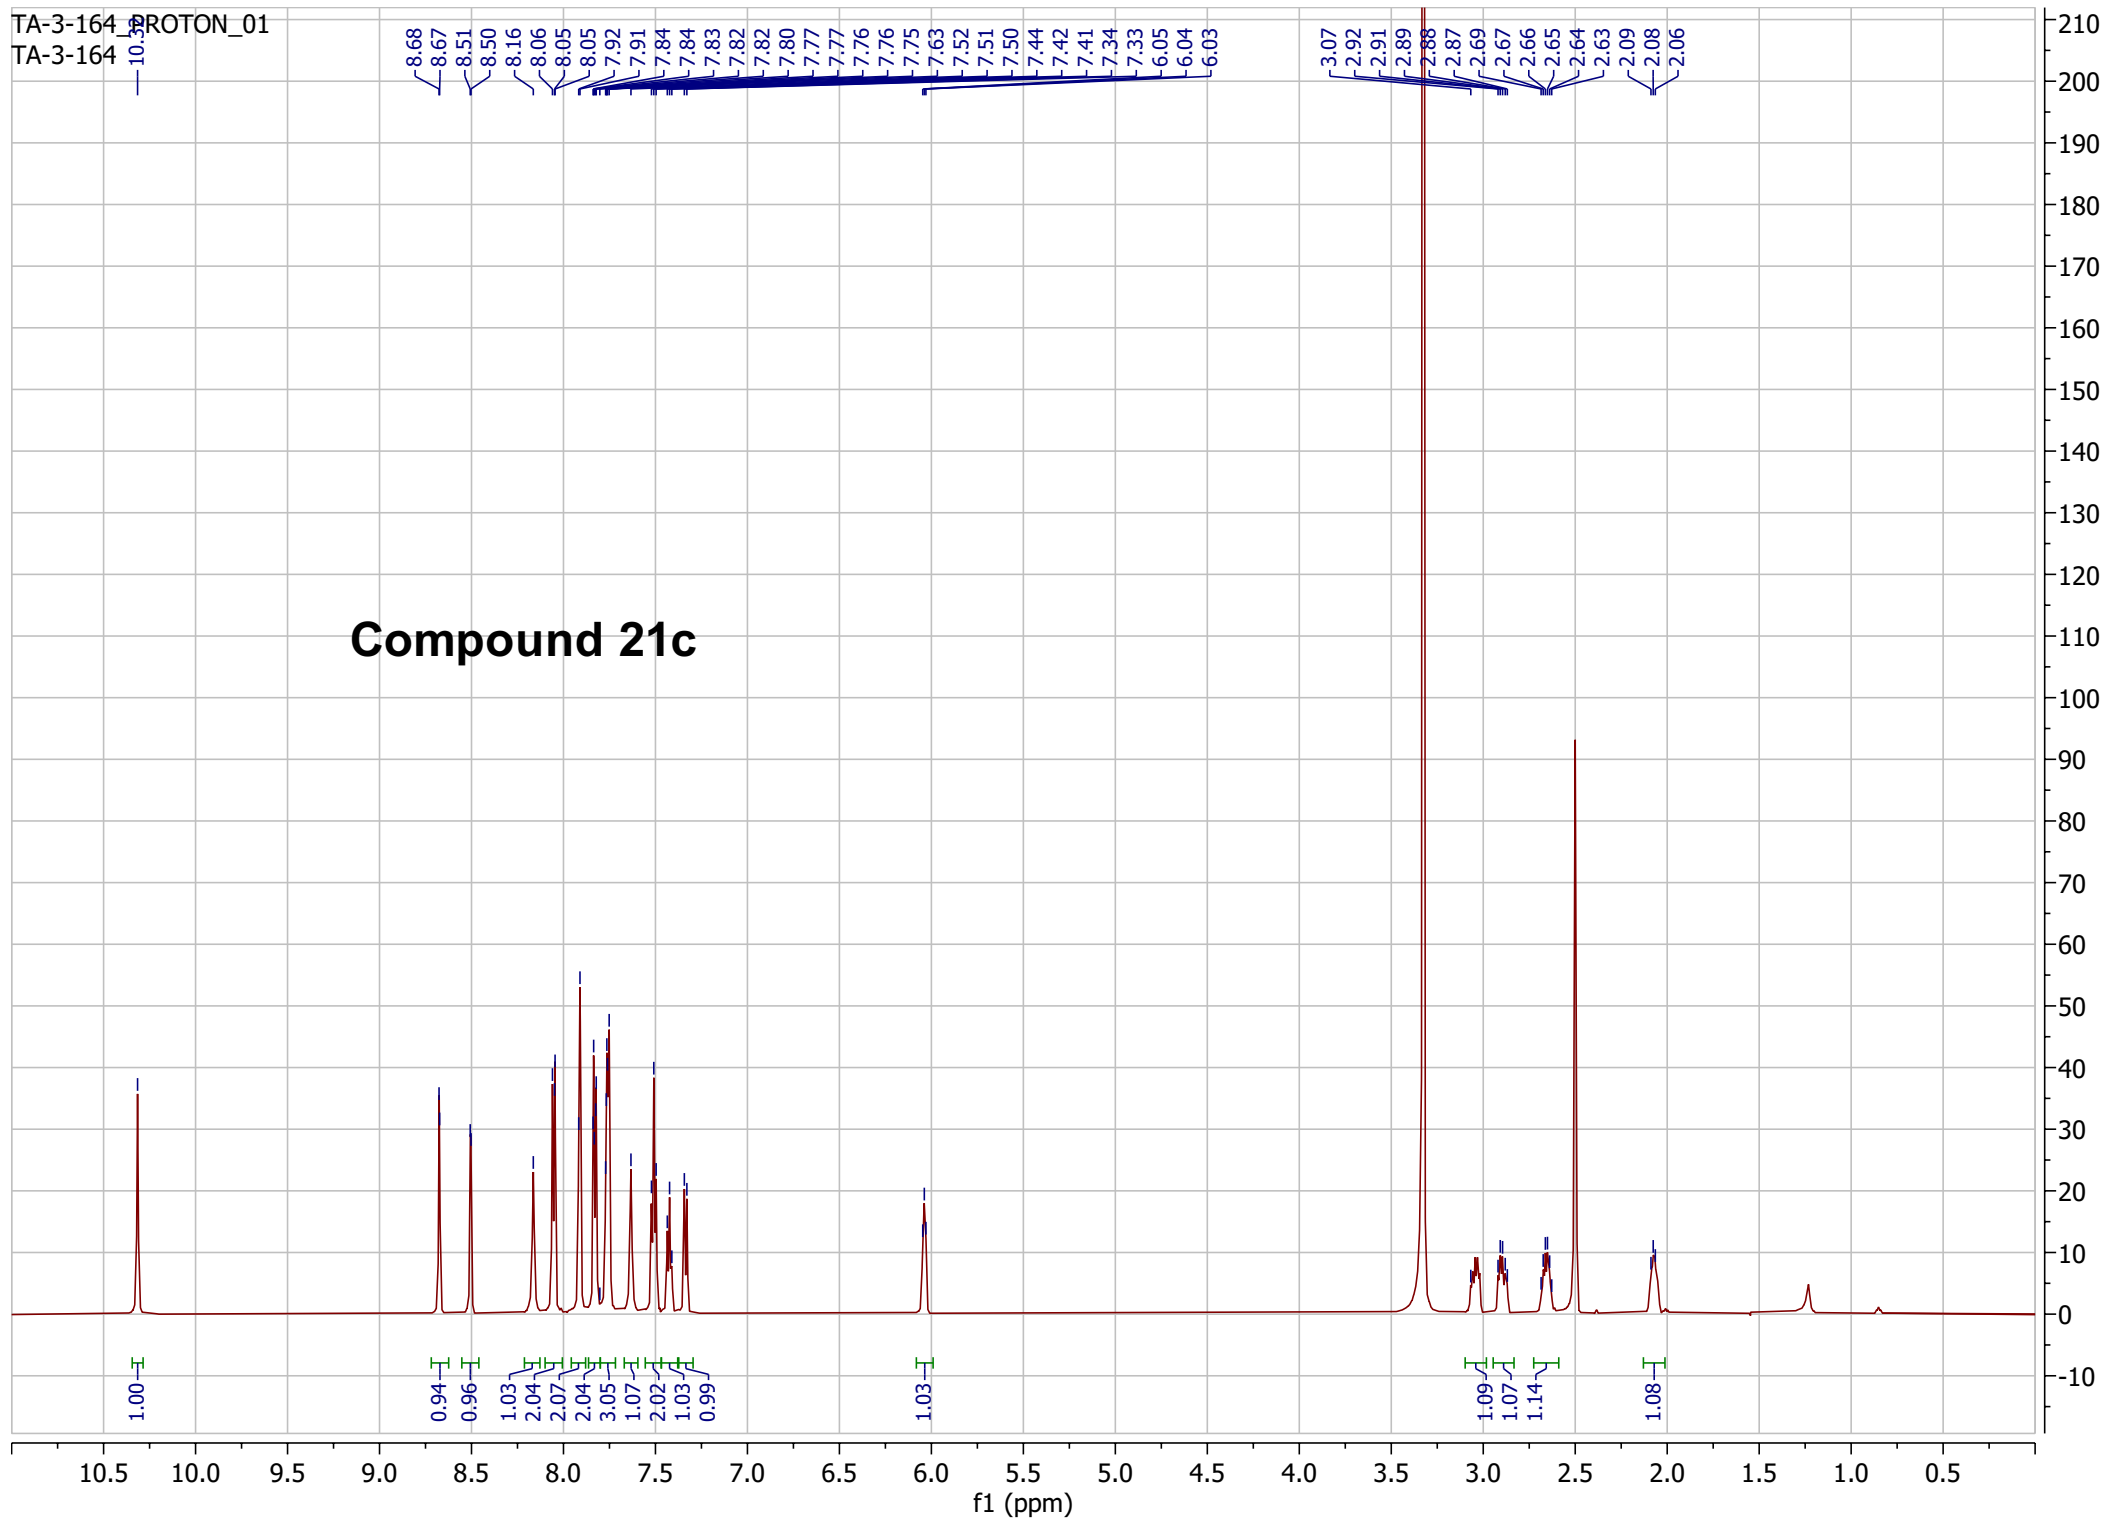



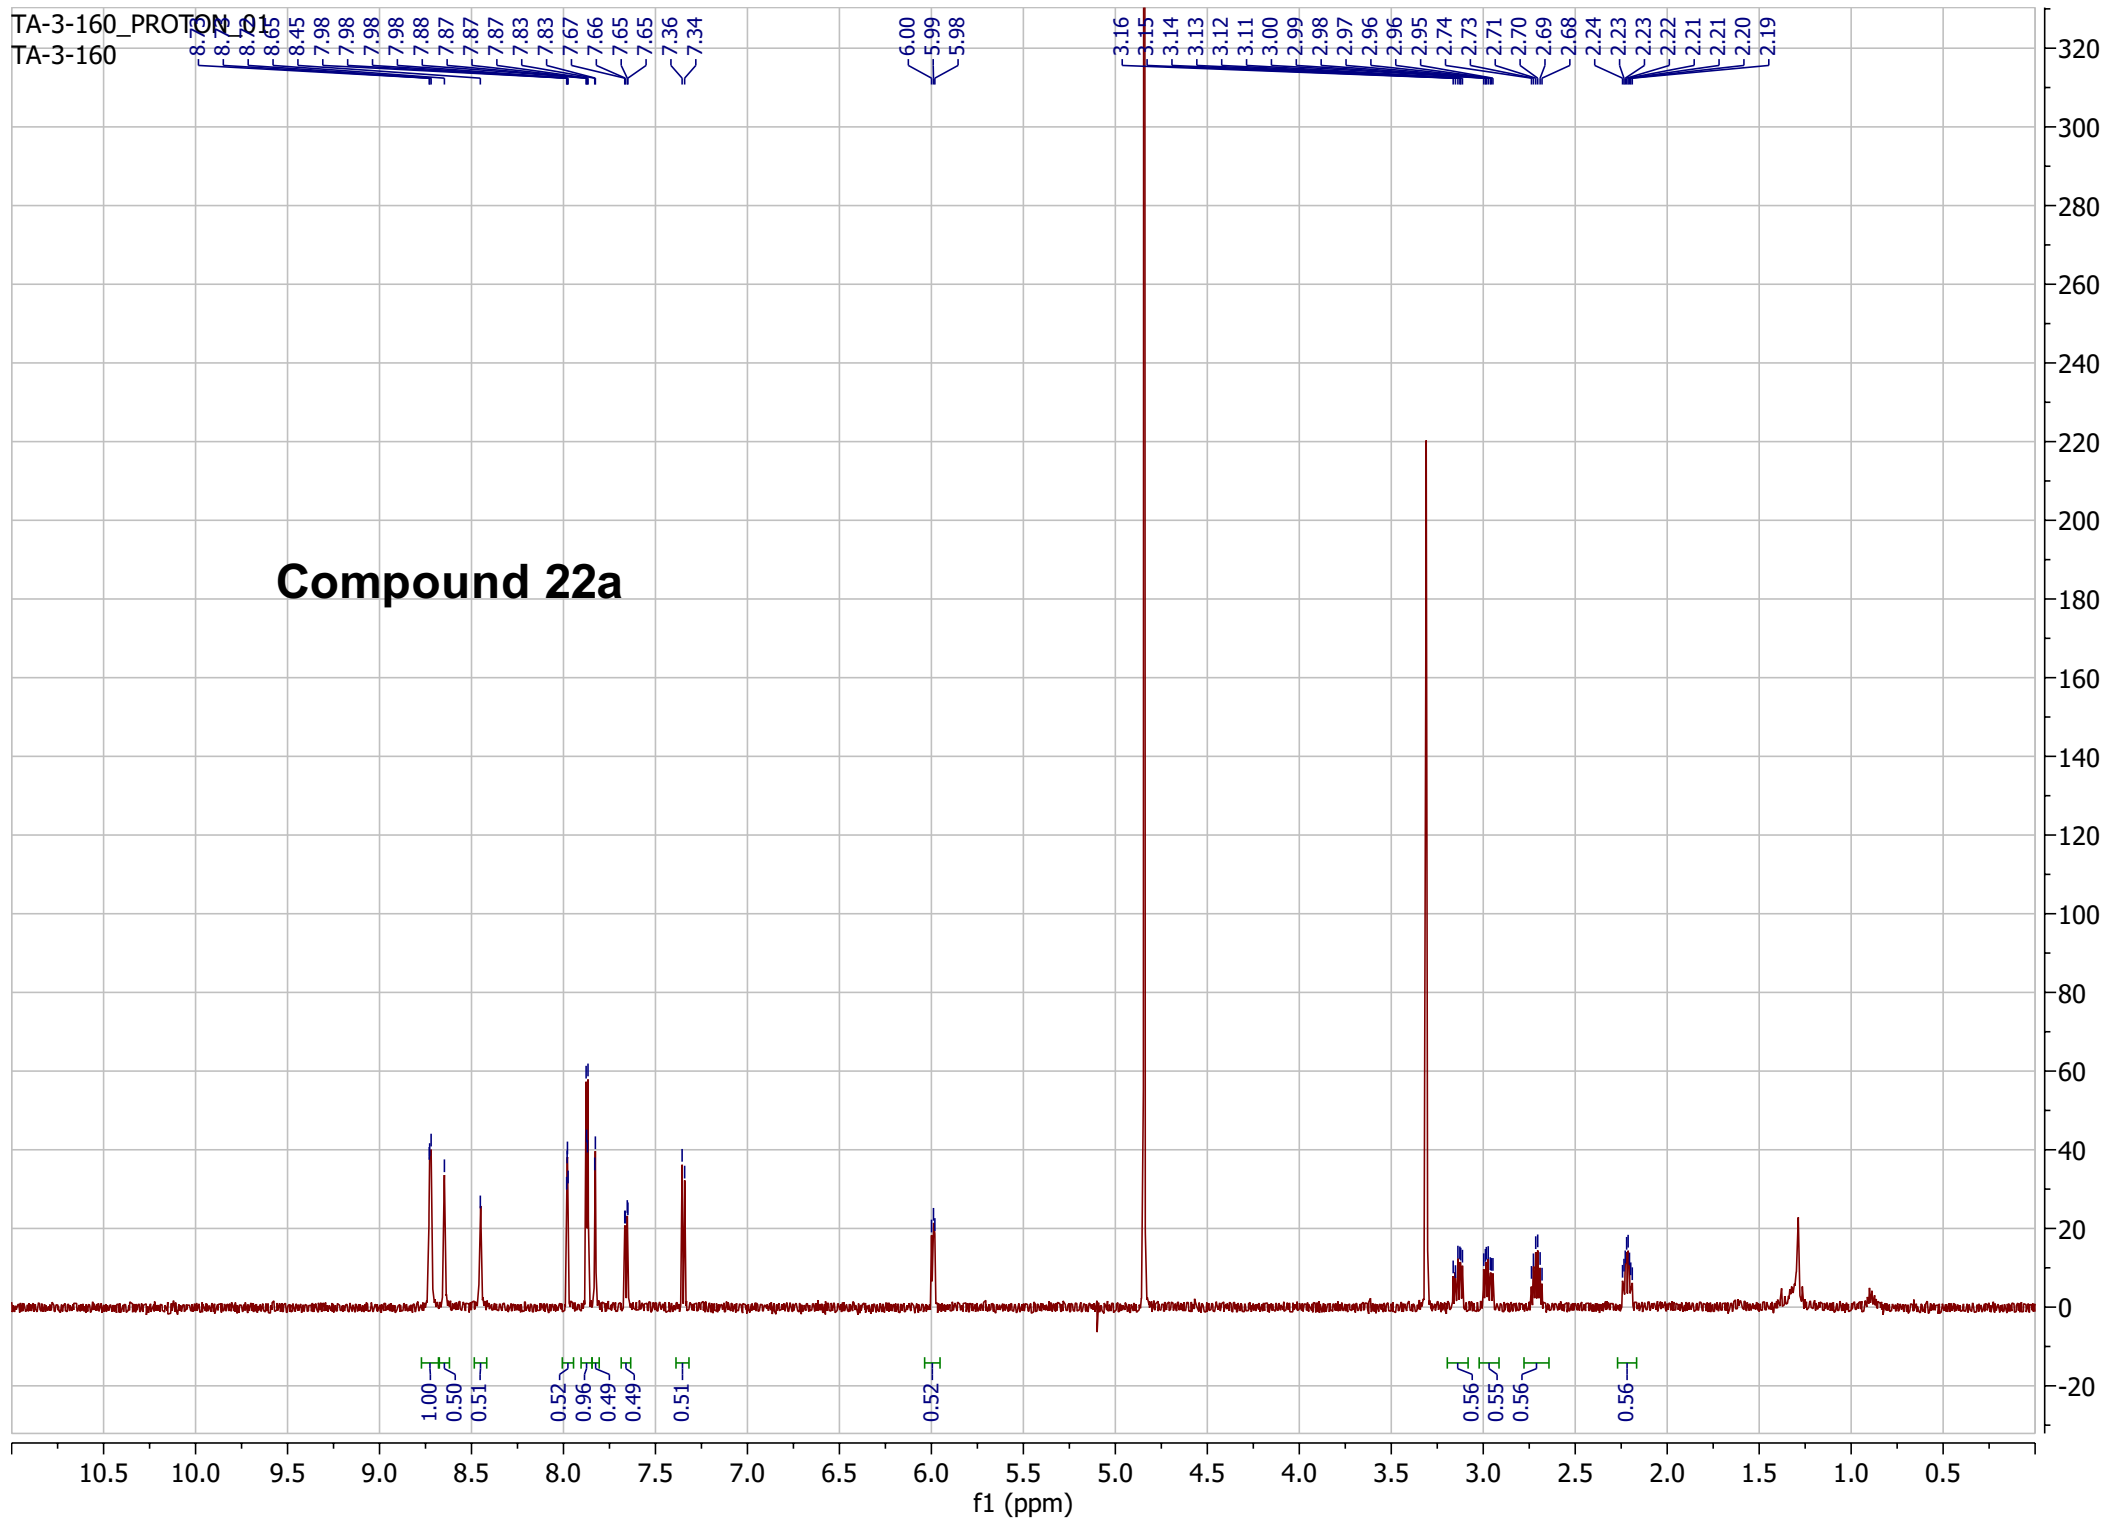

TA-3-161\_PROTON\_01  
TA-3-161

# Compound 22b

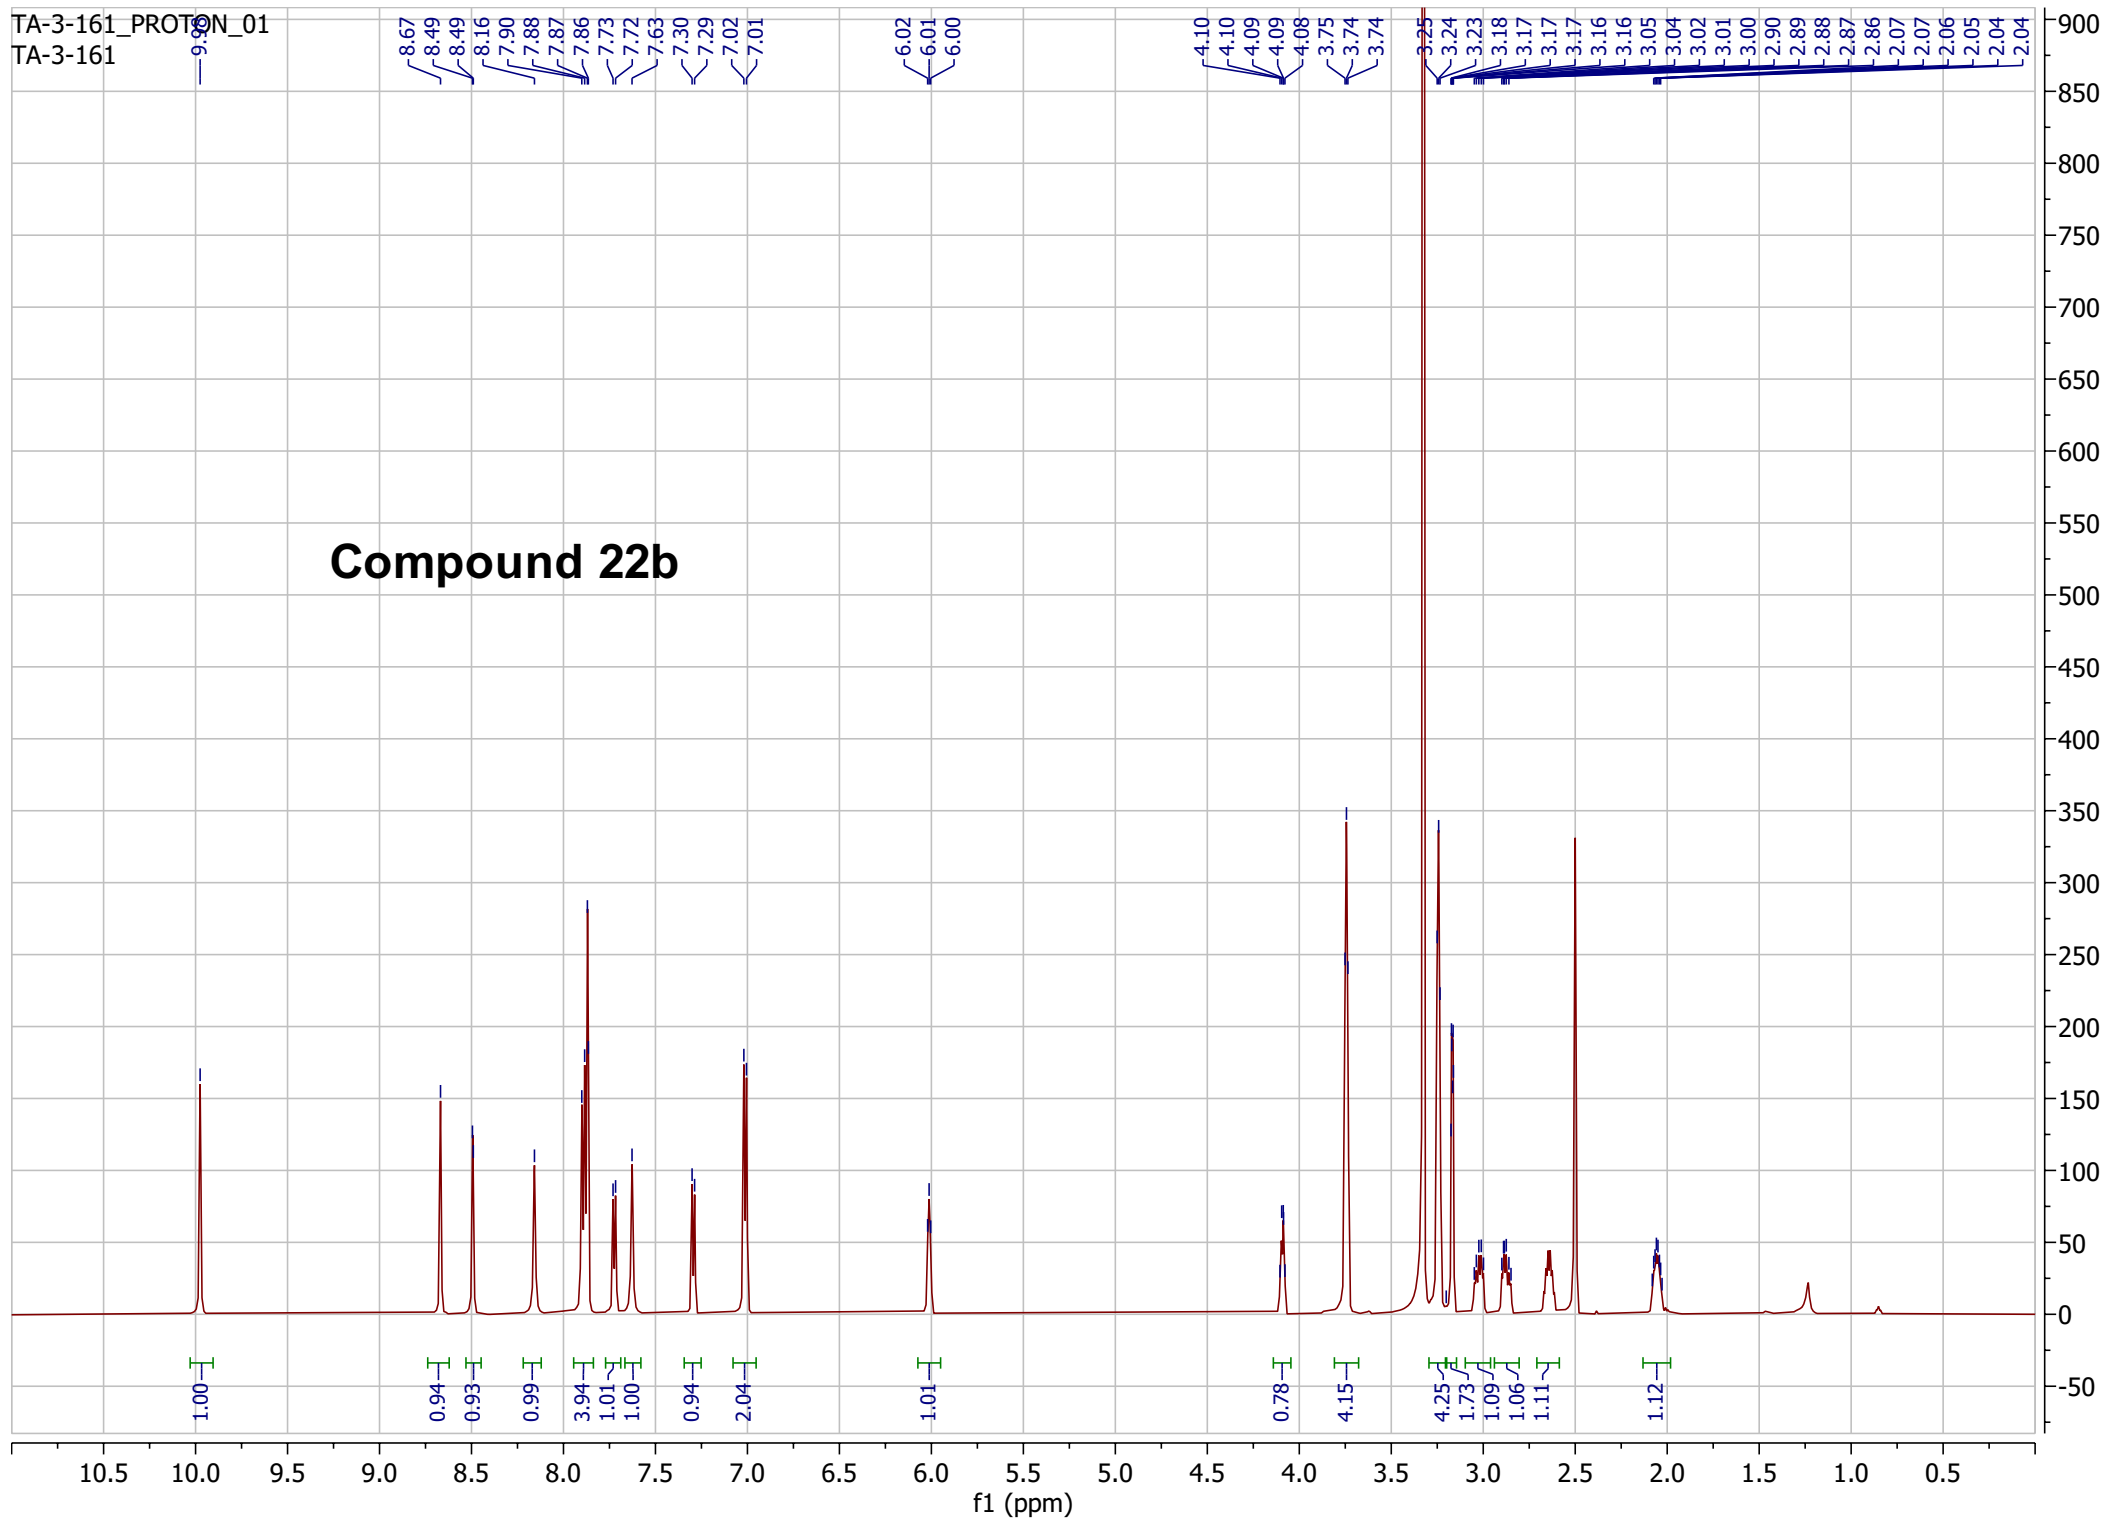

|          |           |
|----------|-----------|
| TA-3-162 | PROTON_01 |
| TA-3-162 |           |

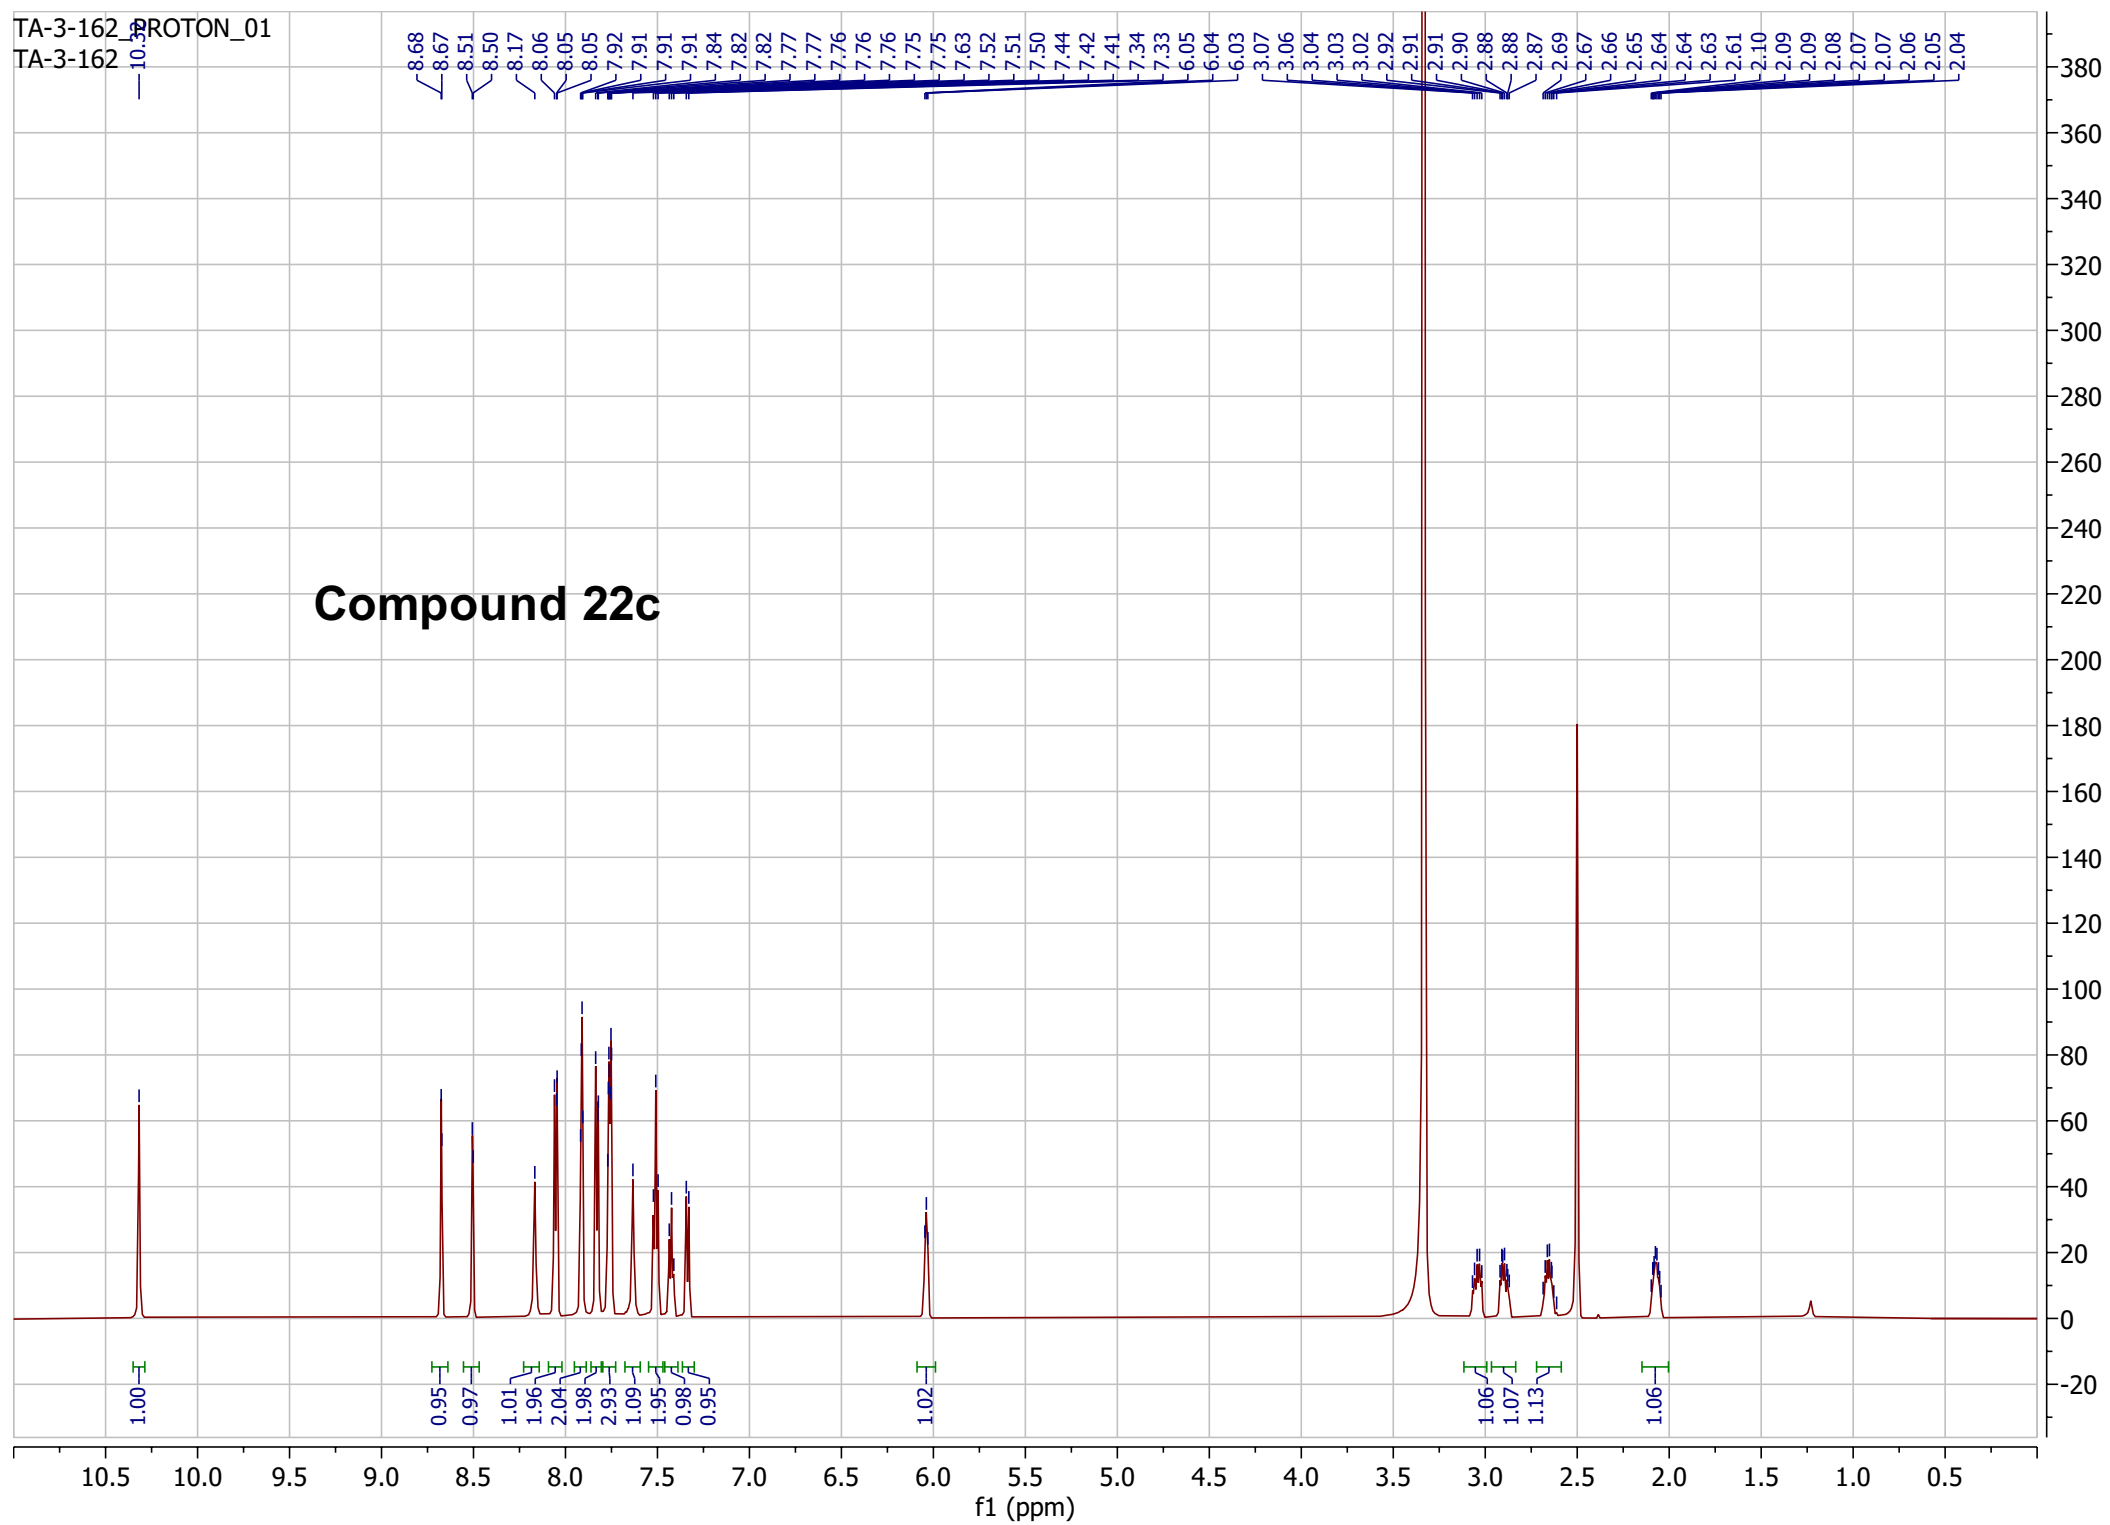

TA-3-23A\_PROTON\_01  
TA-3-23A

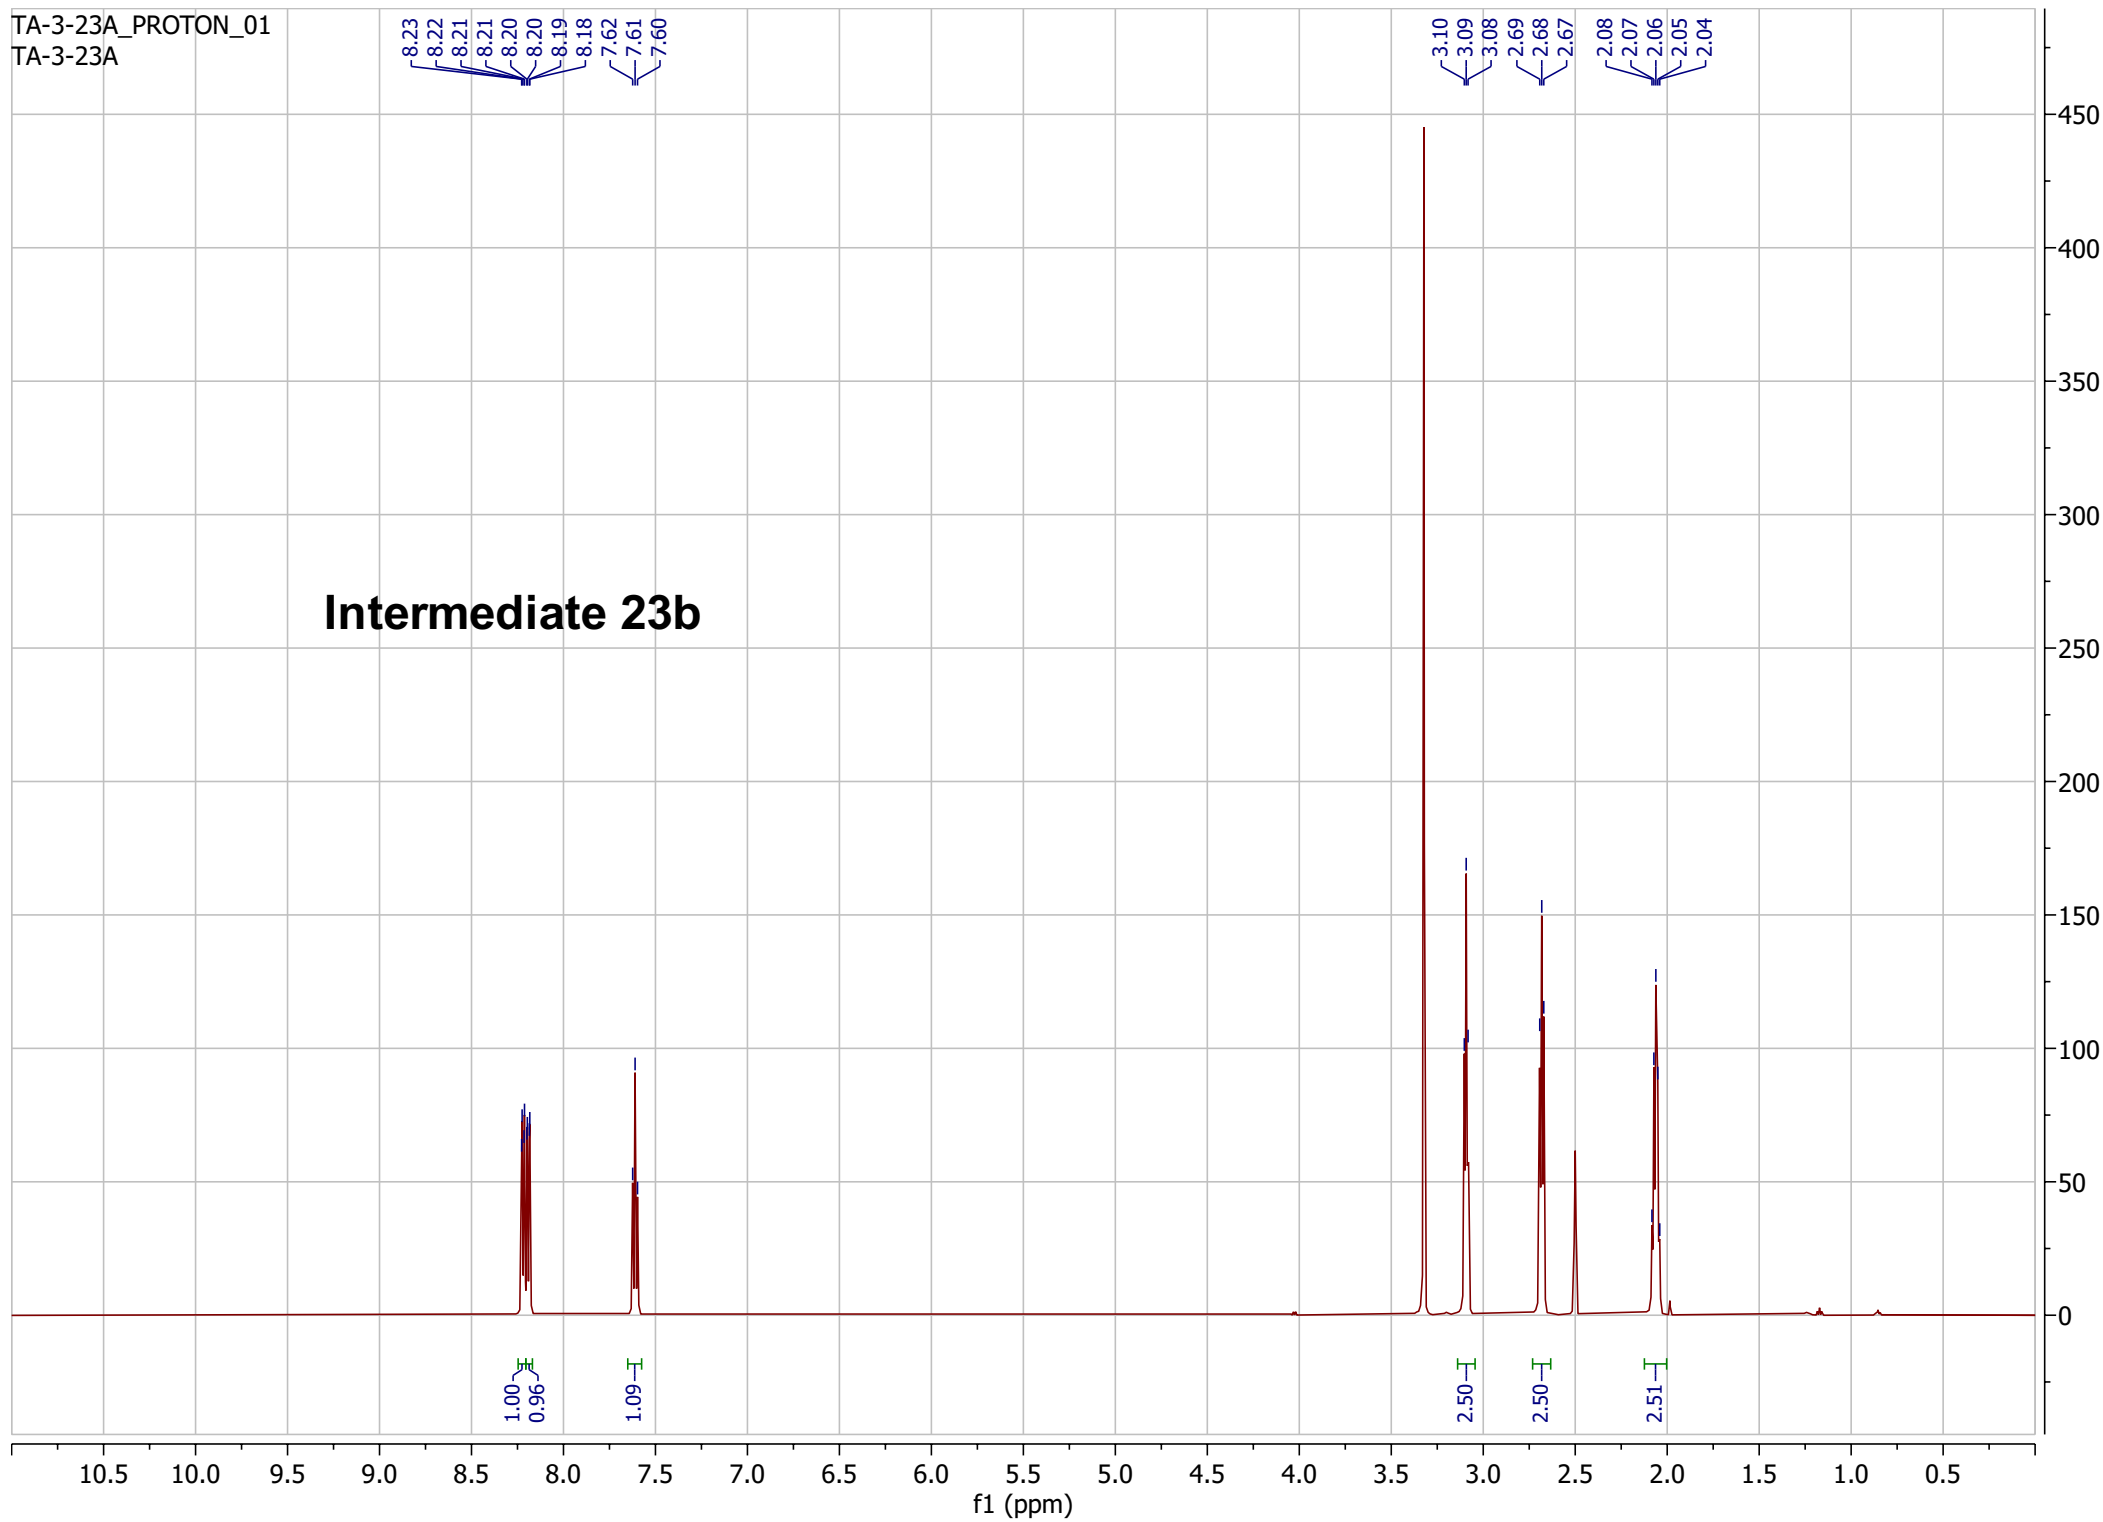

TA-3-023B\_PROTON 01  
TA-3-023B

# Intermediate 23d

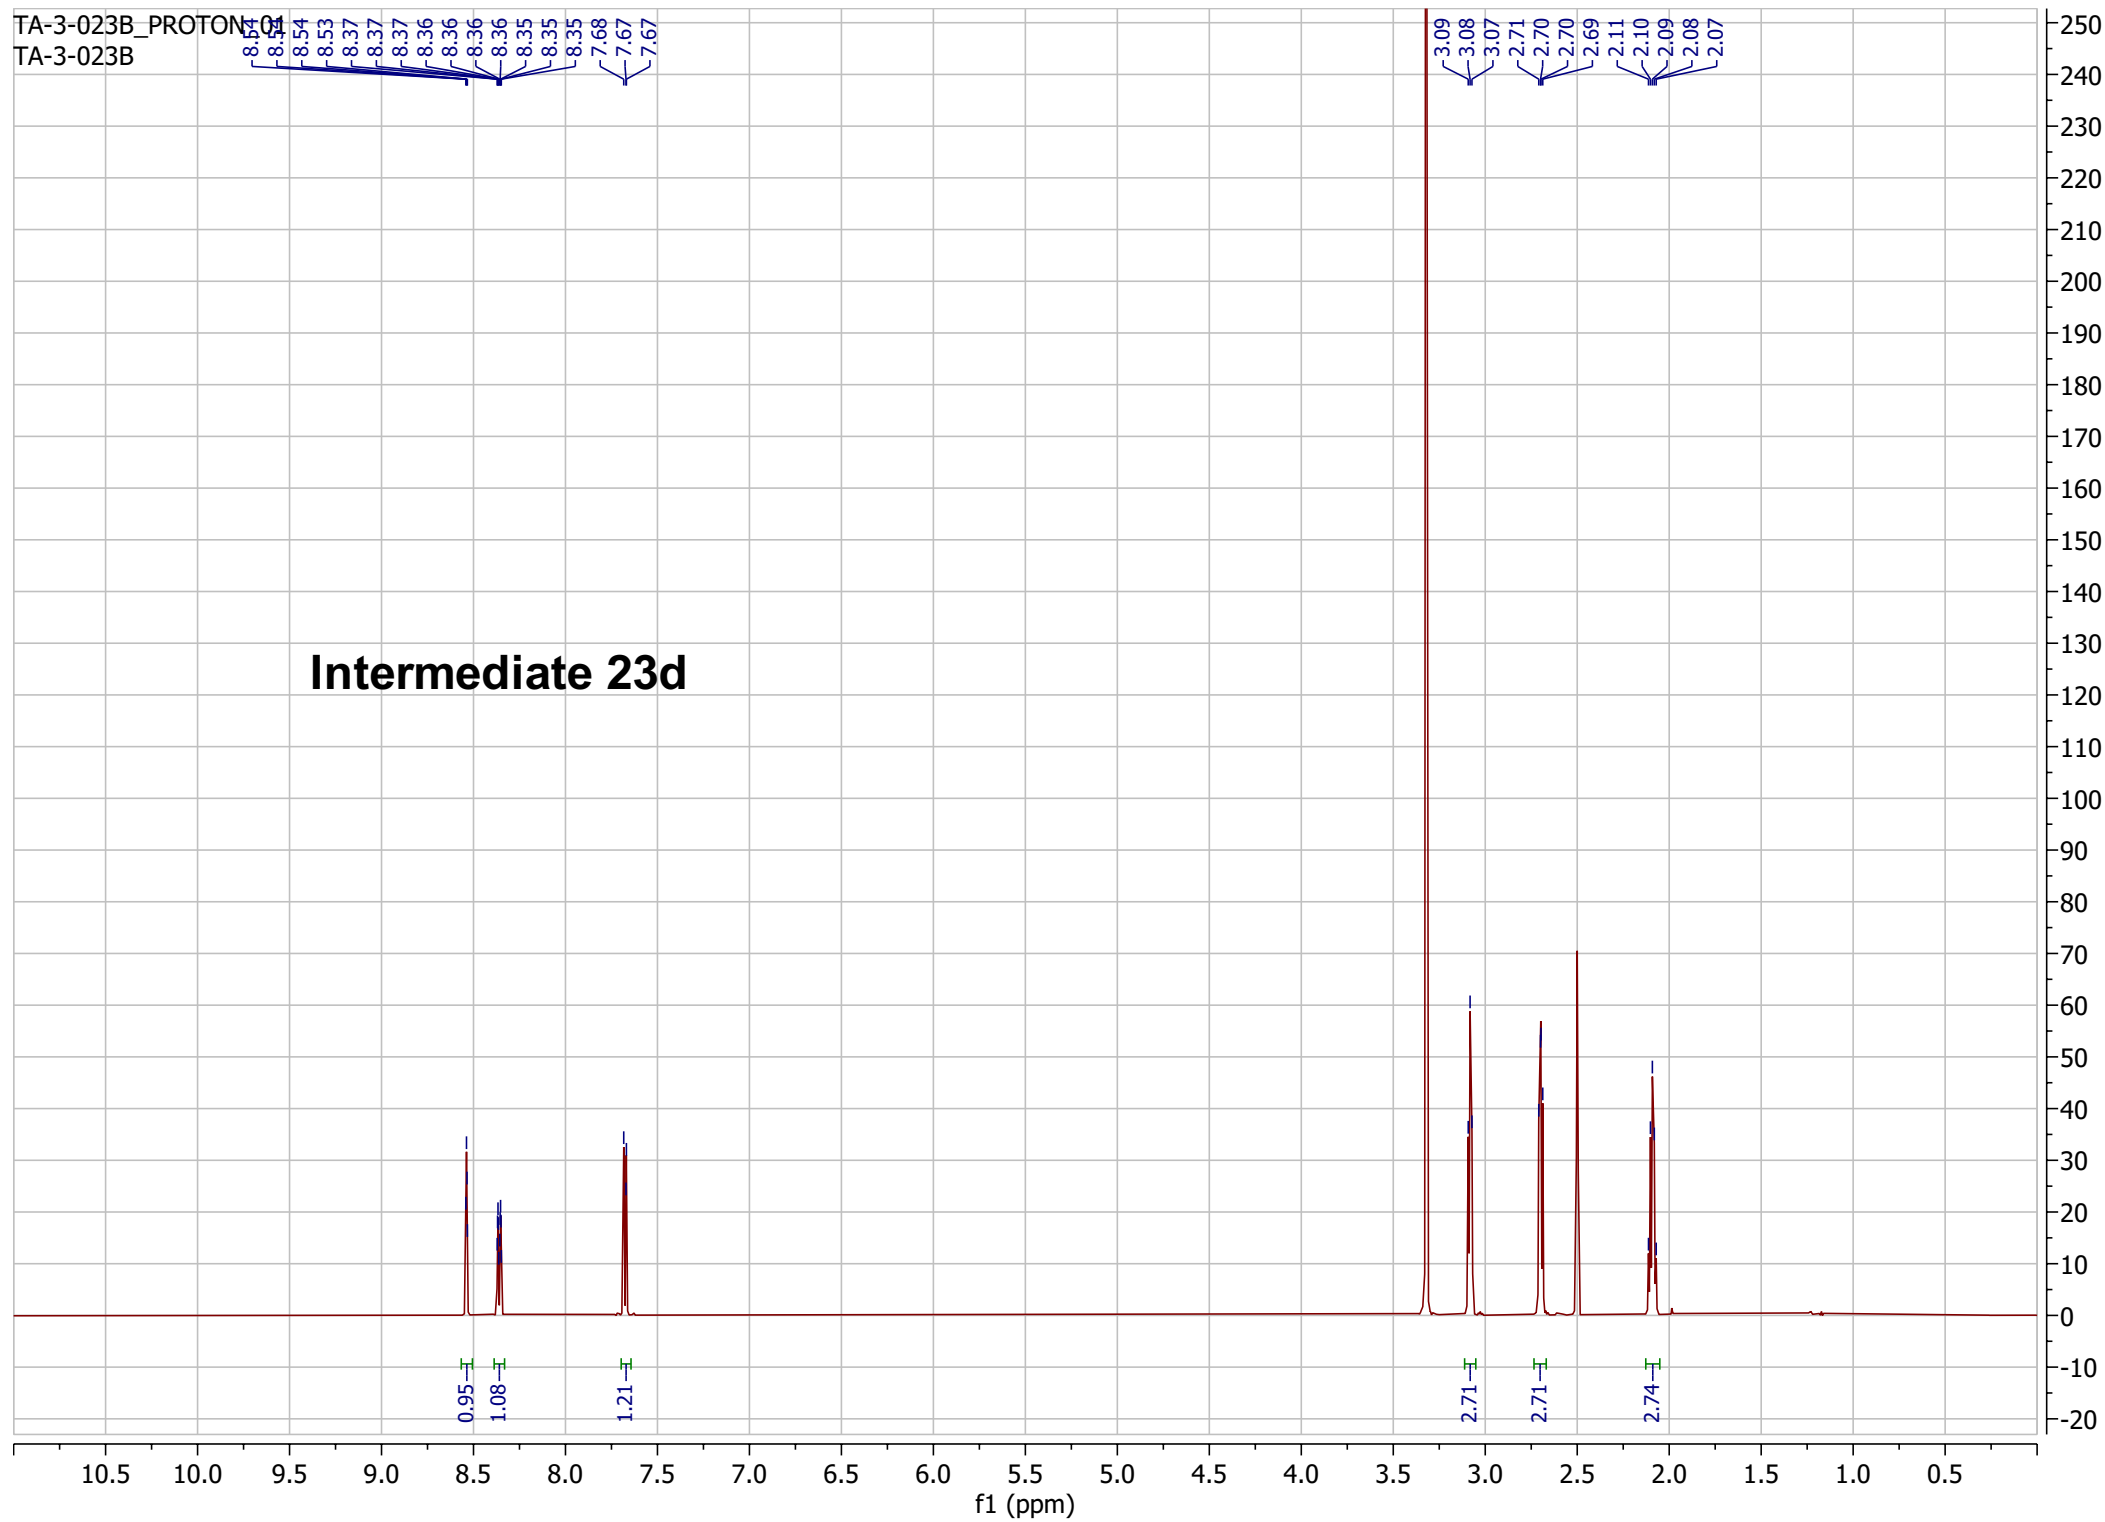

TA-2-007\_PROTON\_01  
TA-2-007

# Intermediate 24a

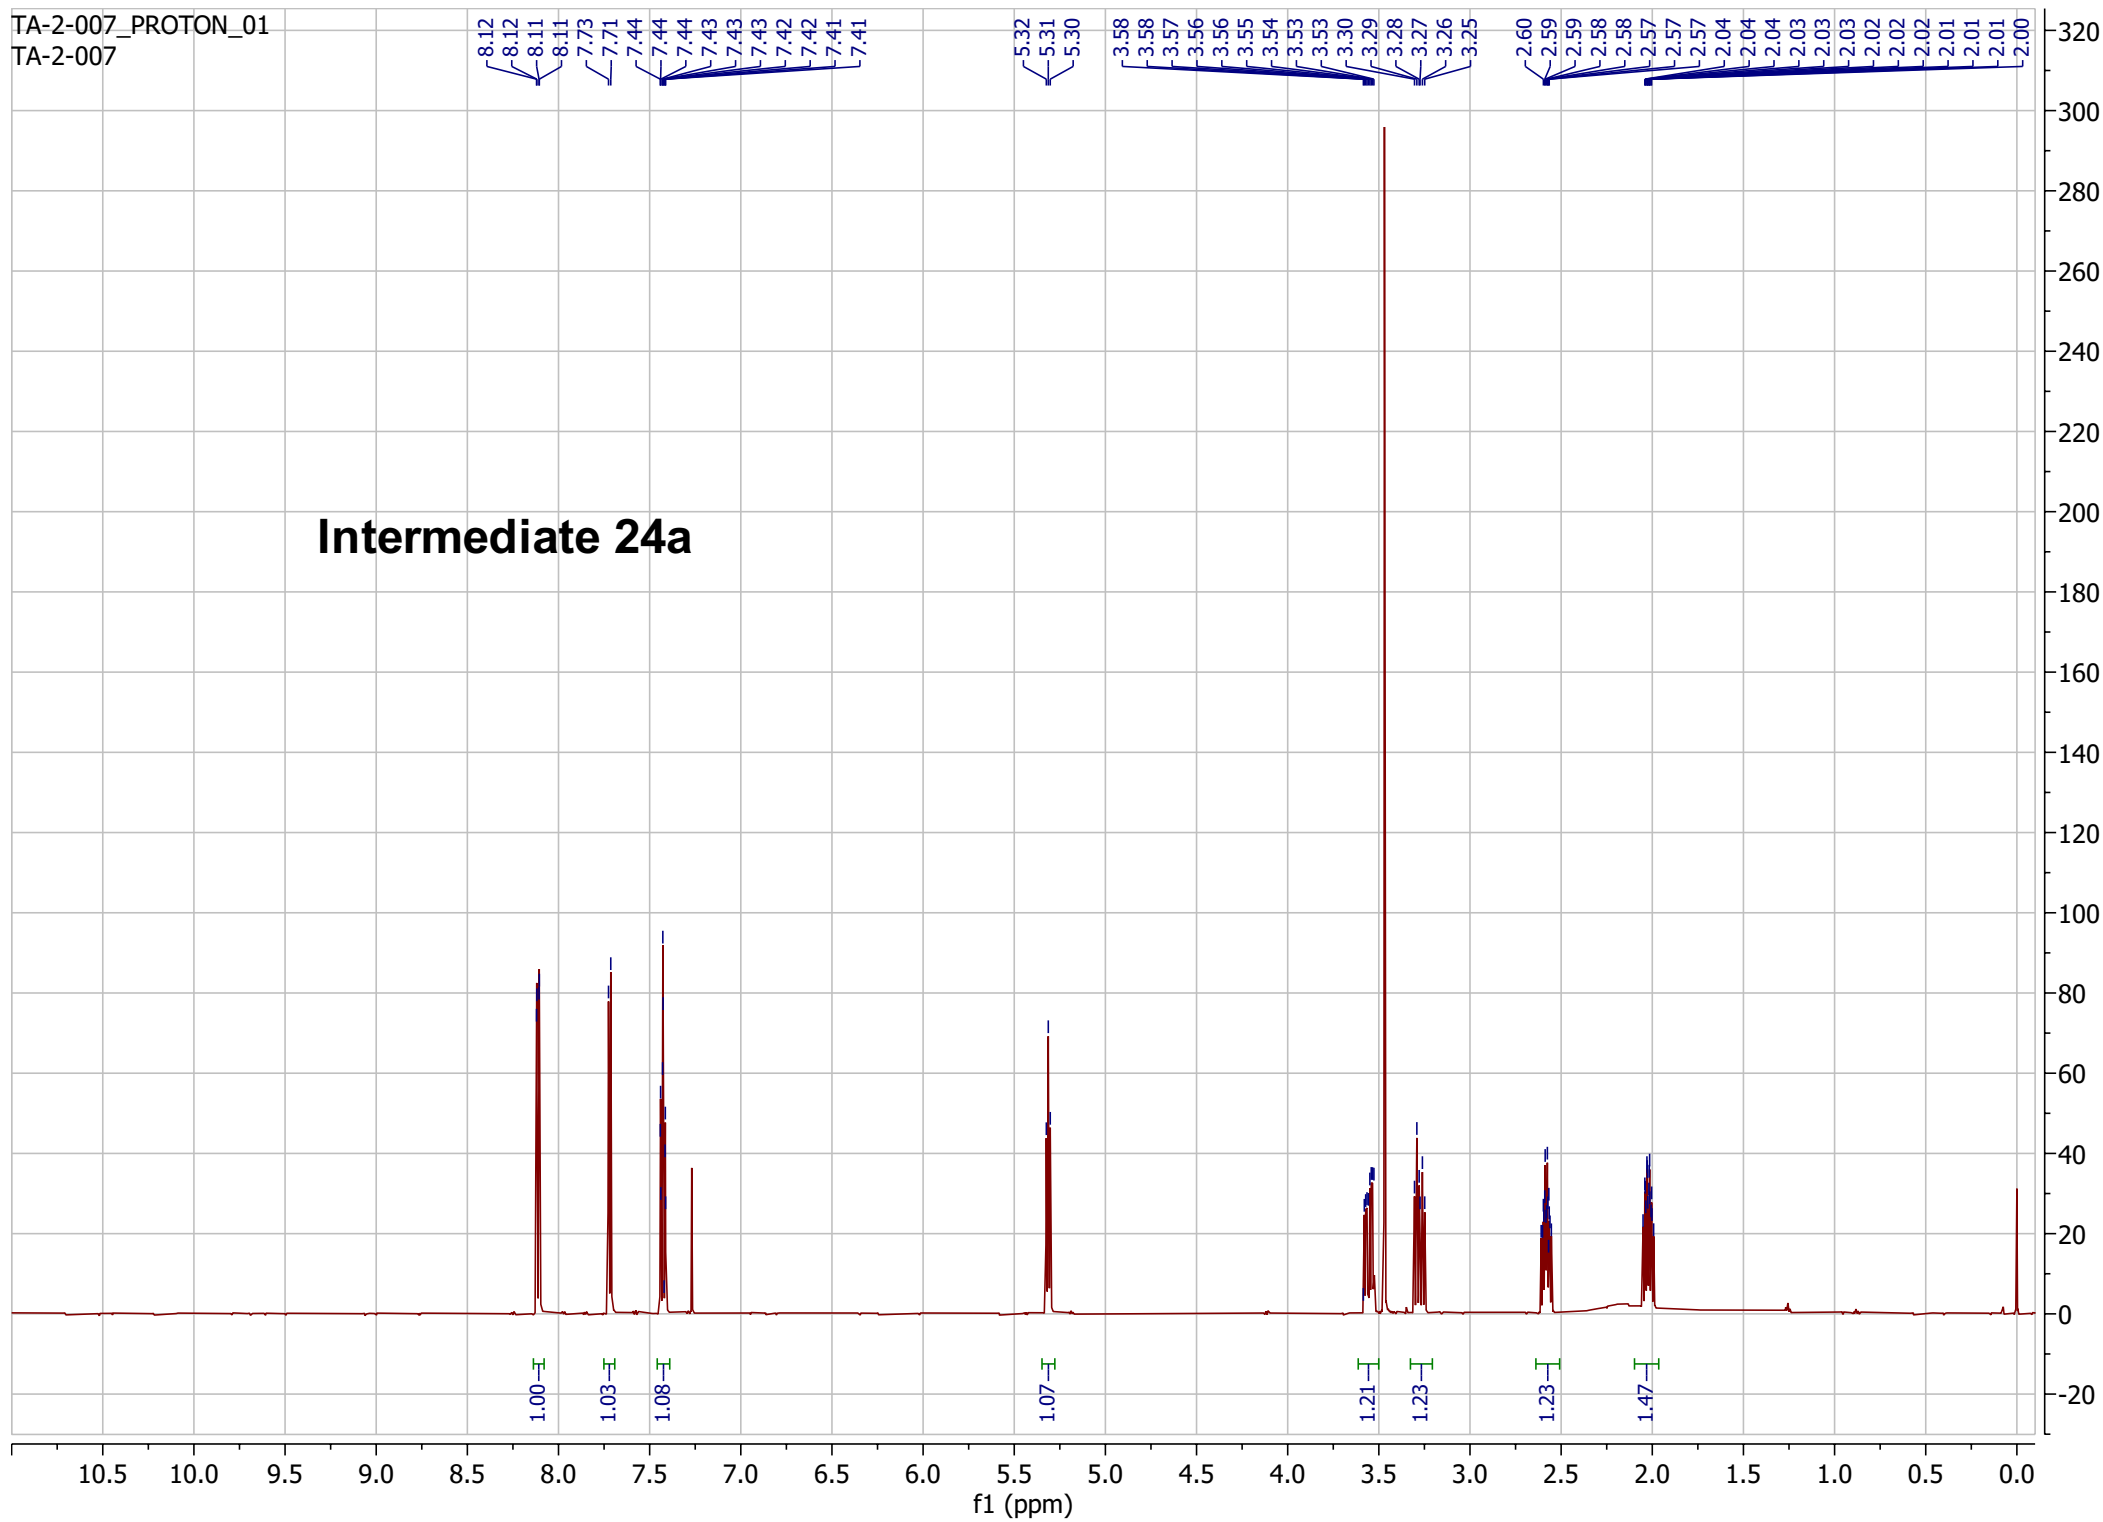

# Intermediate 24b

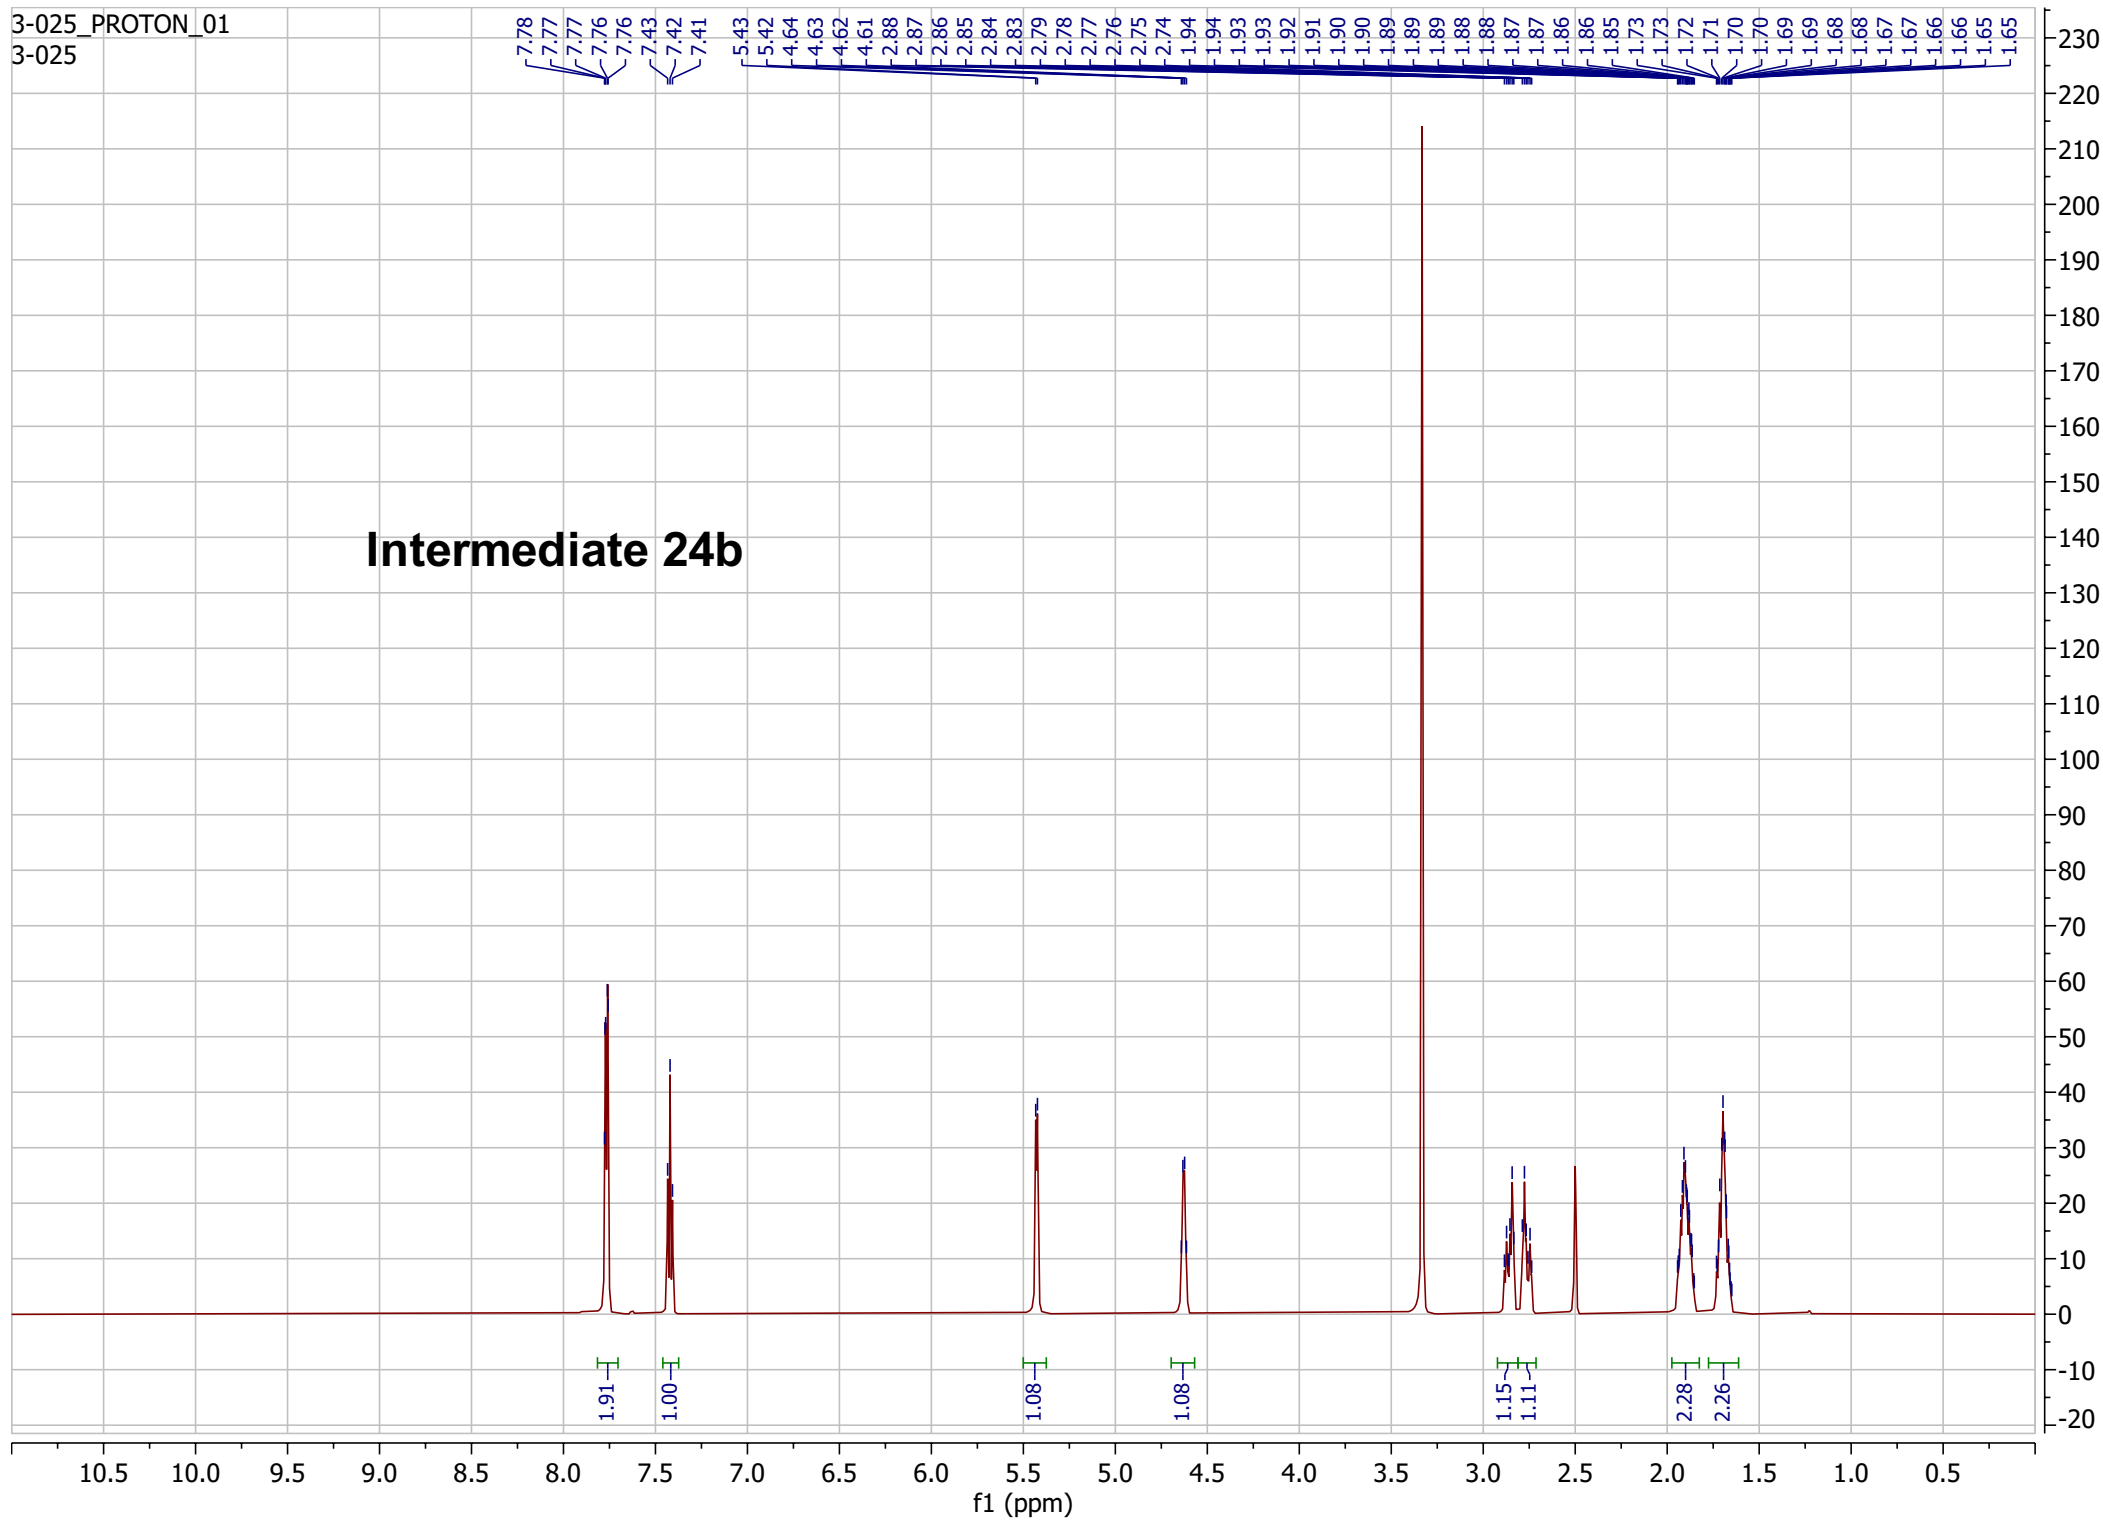

TA-3-127\_PROTON\_01  
TA-3-127

# Intermediate 24c

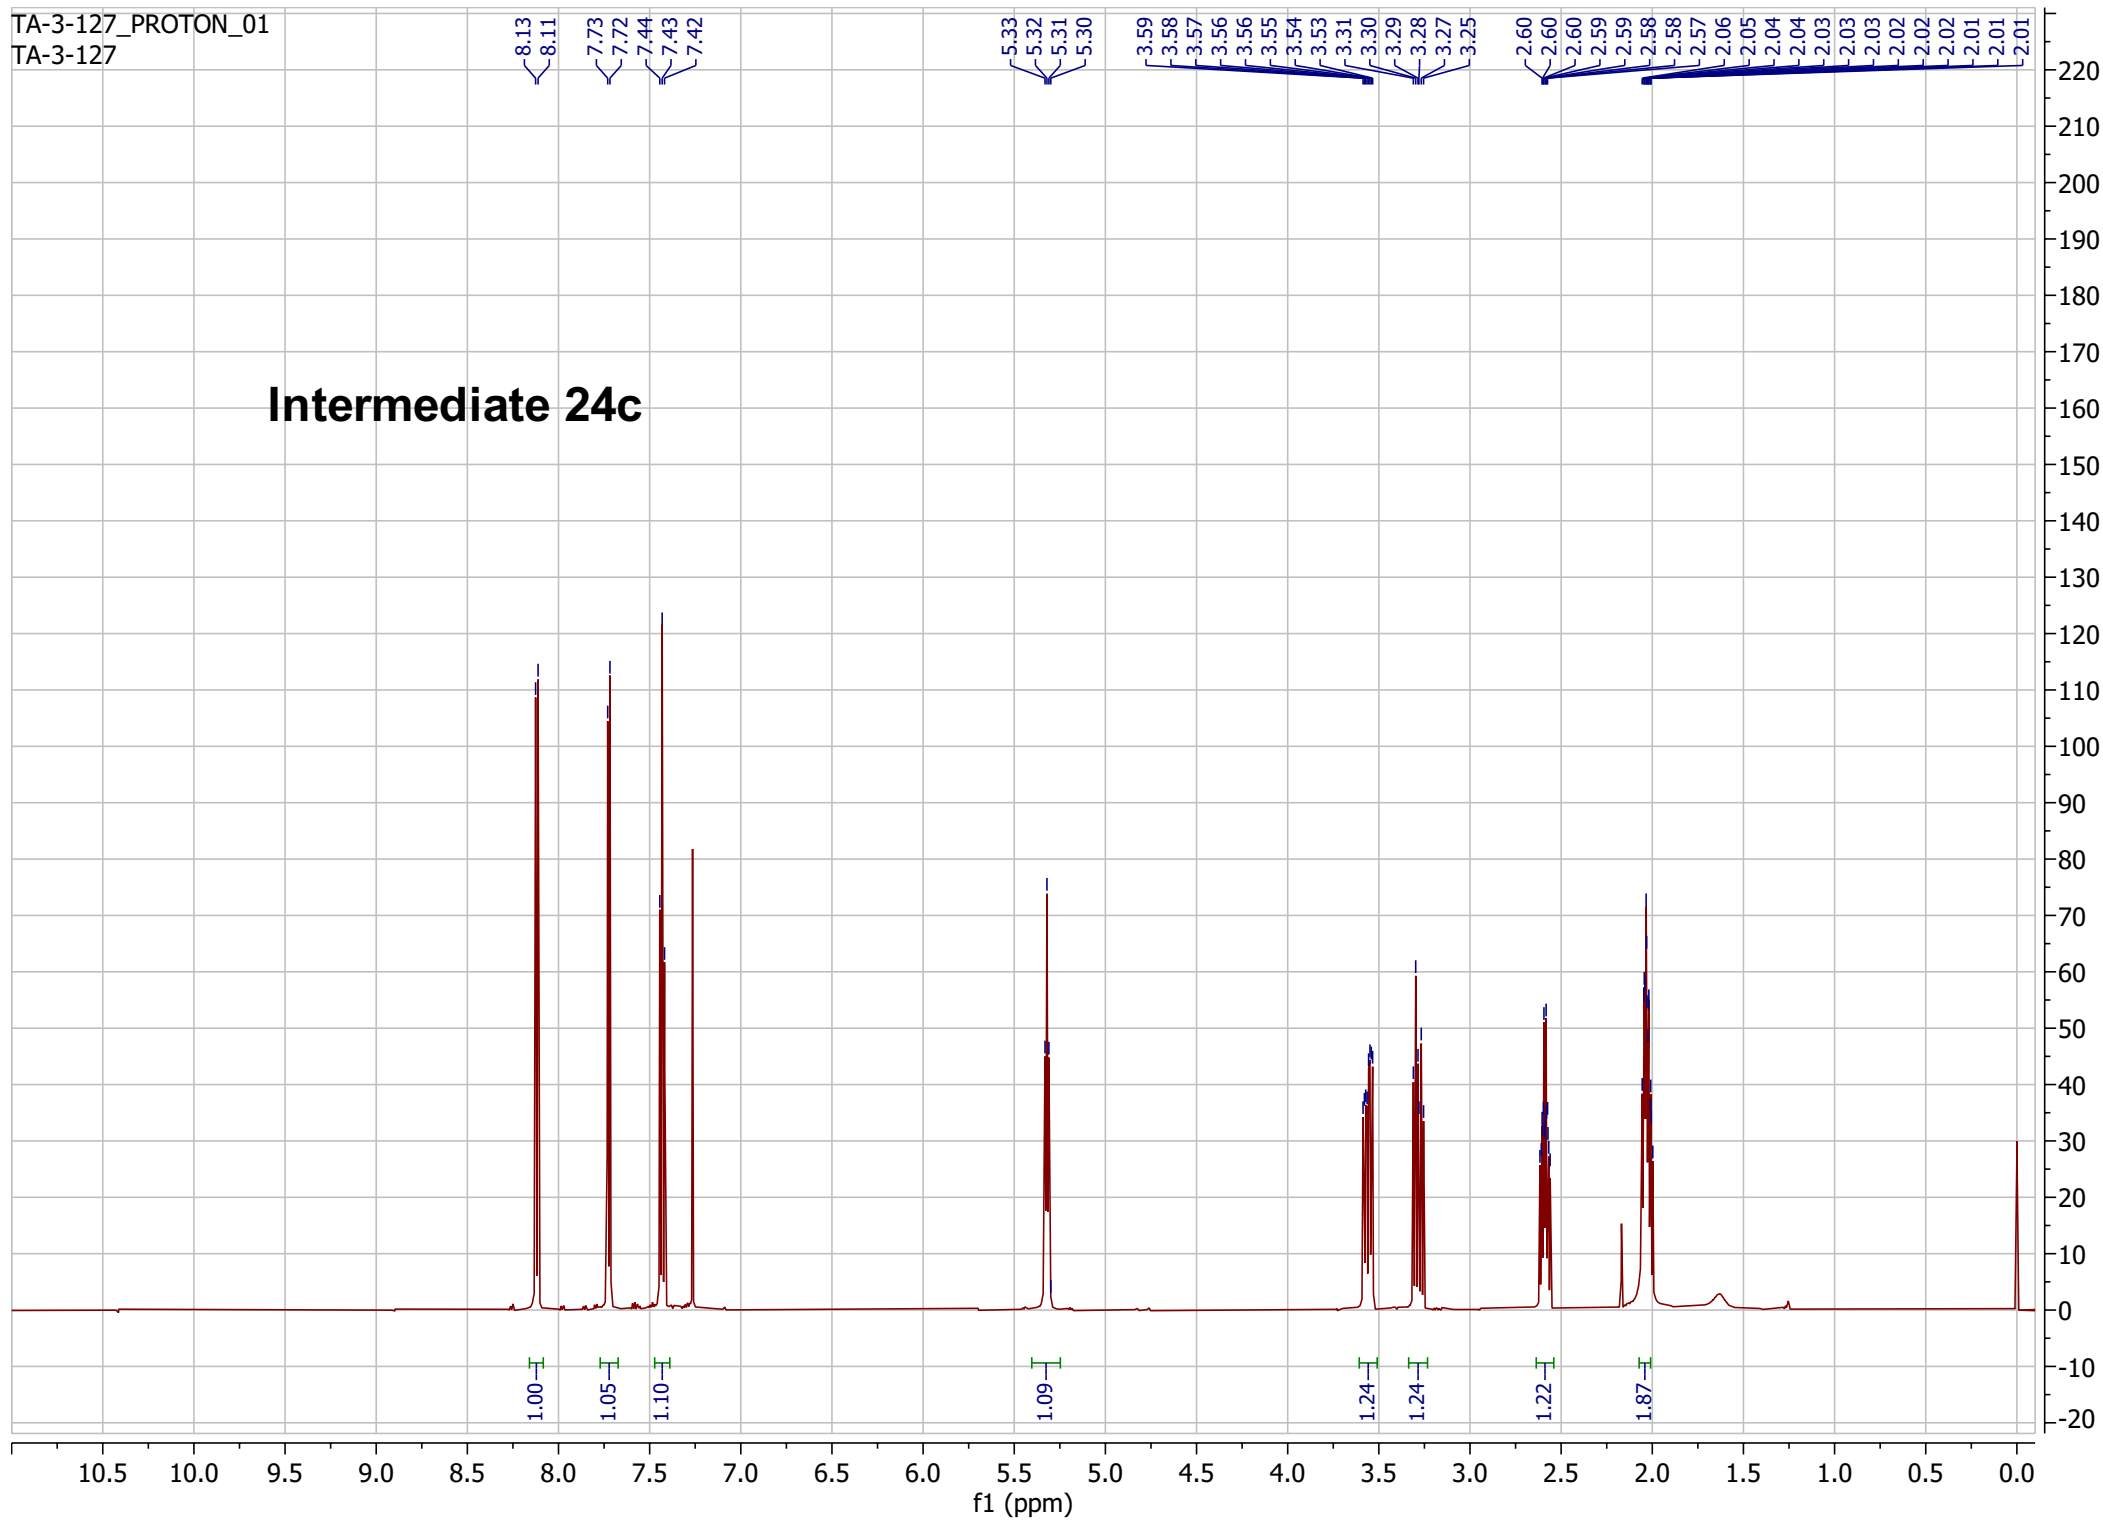



# Intermediate 24d

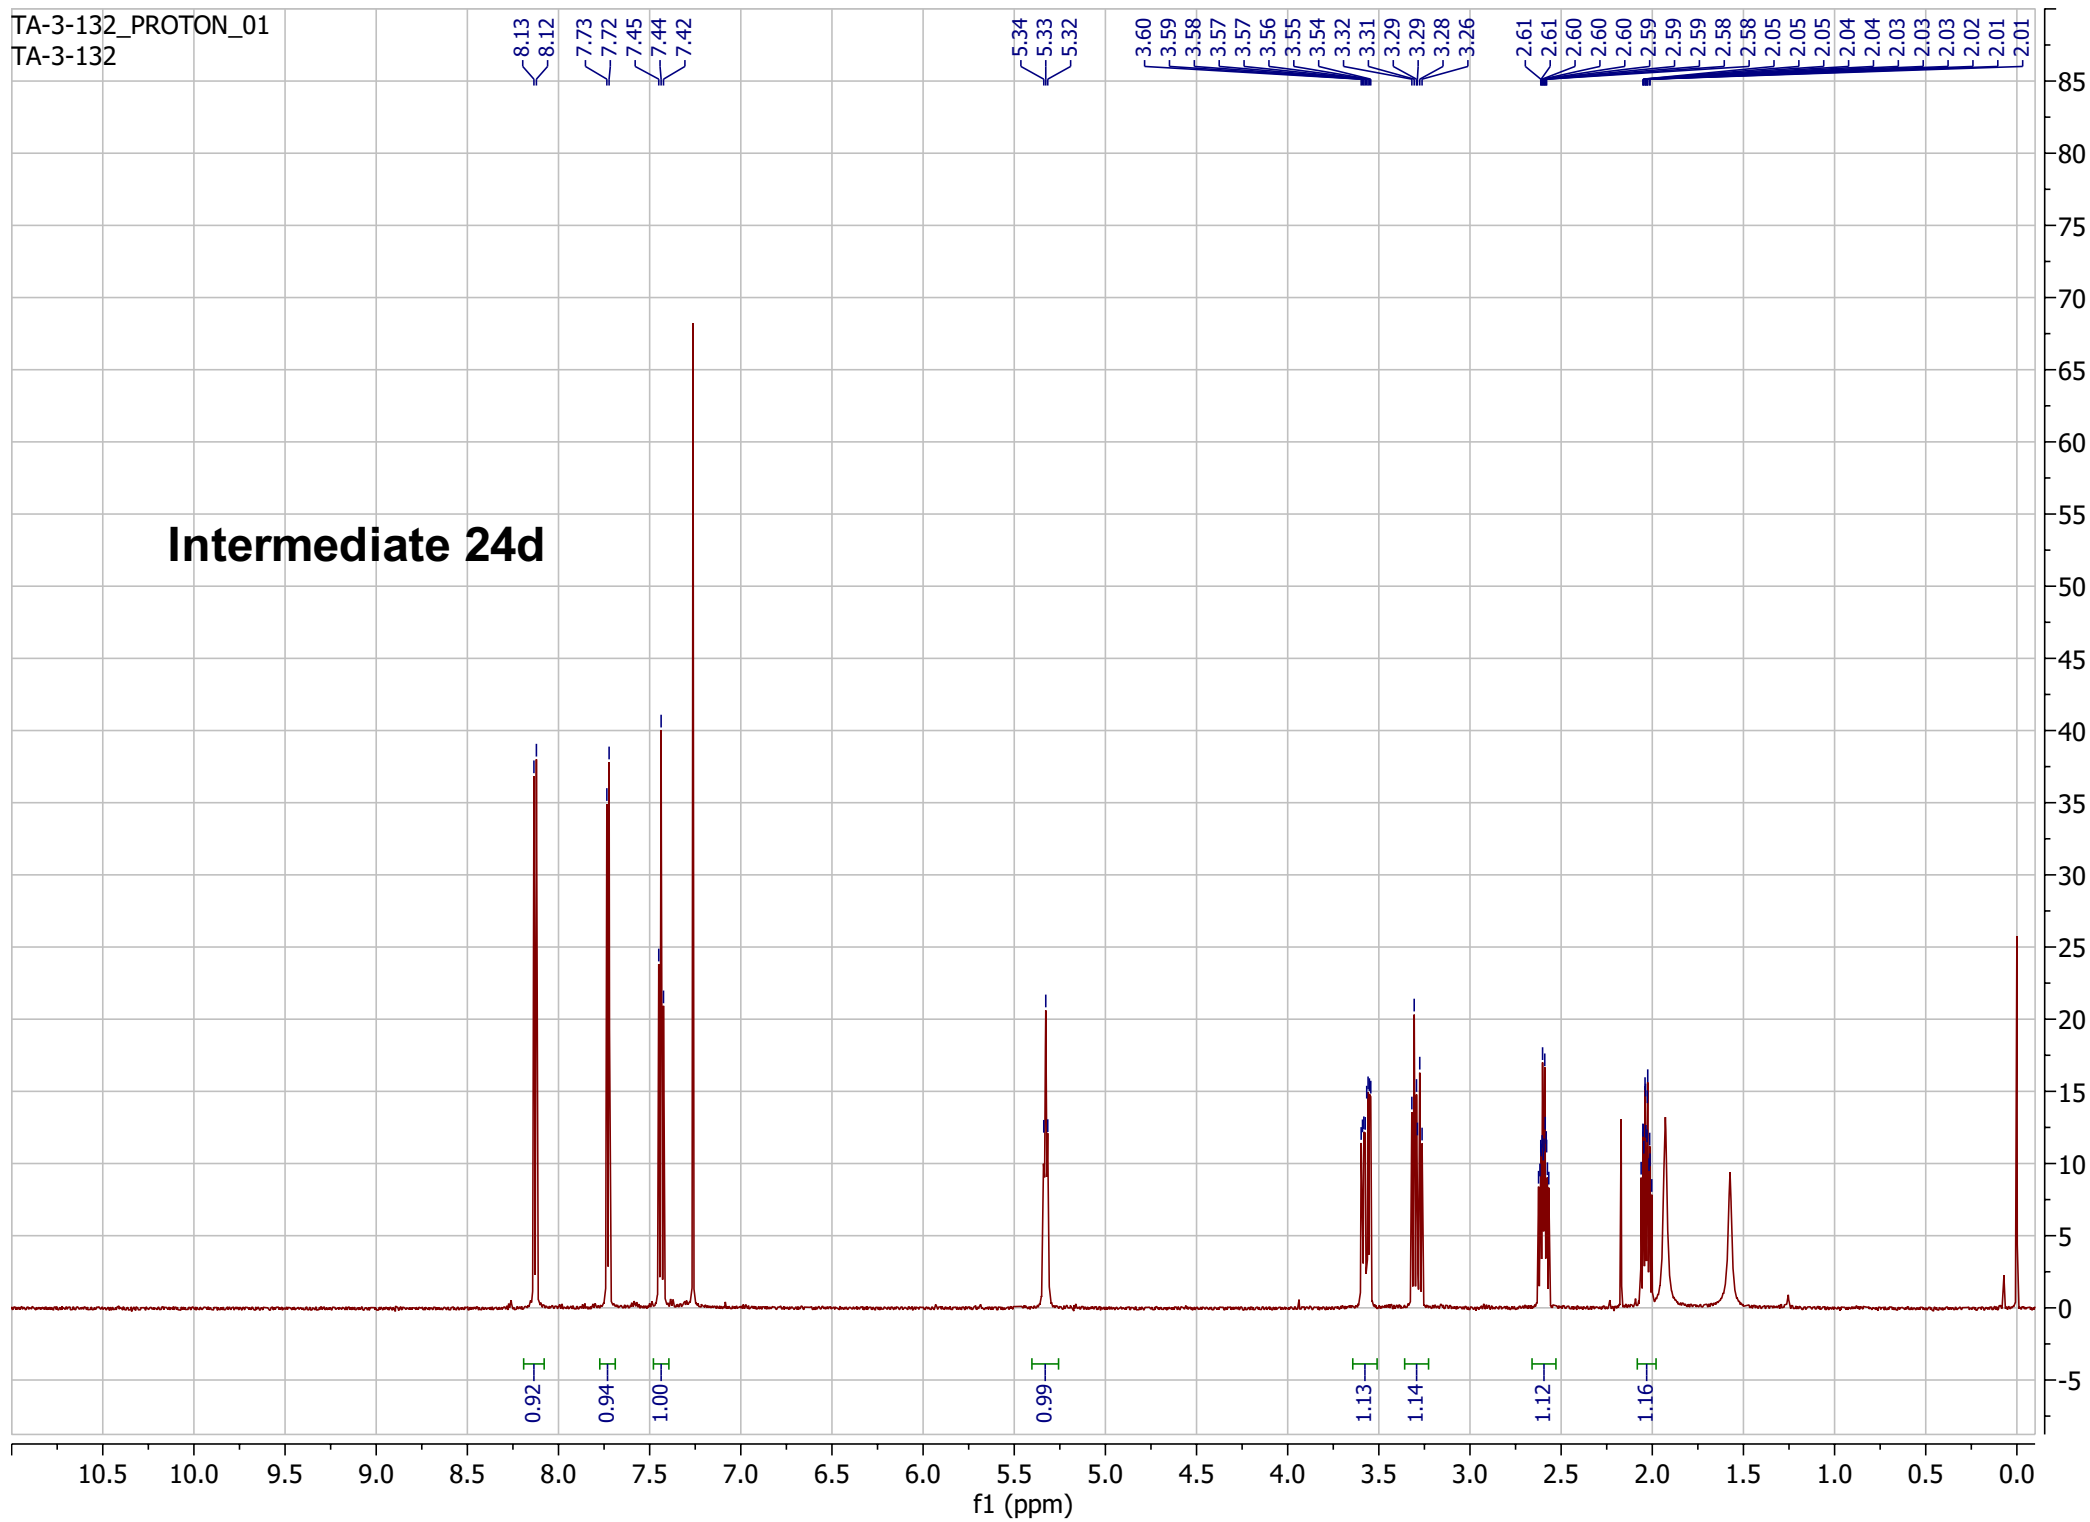

TA-2-008\_PROTON\_01  
TA-2-008

# Intermediate 24e

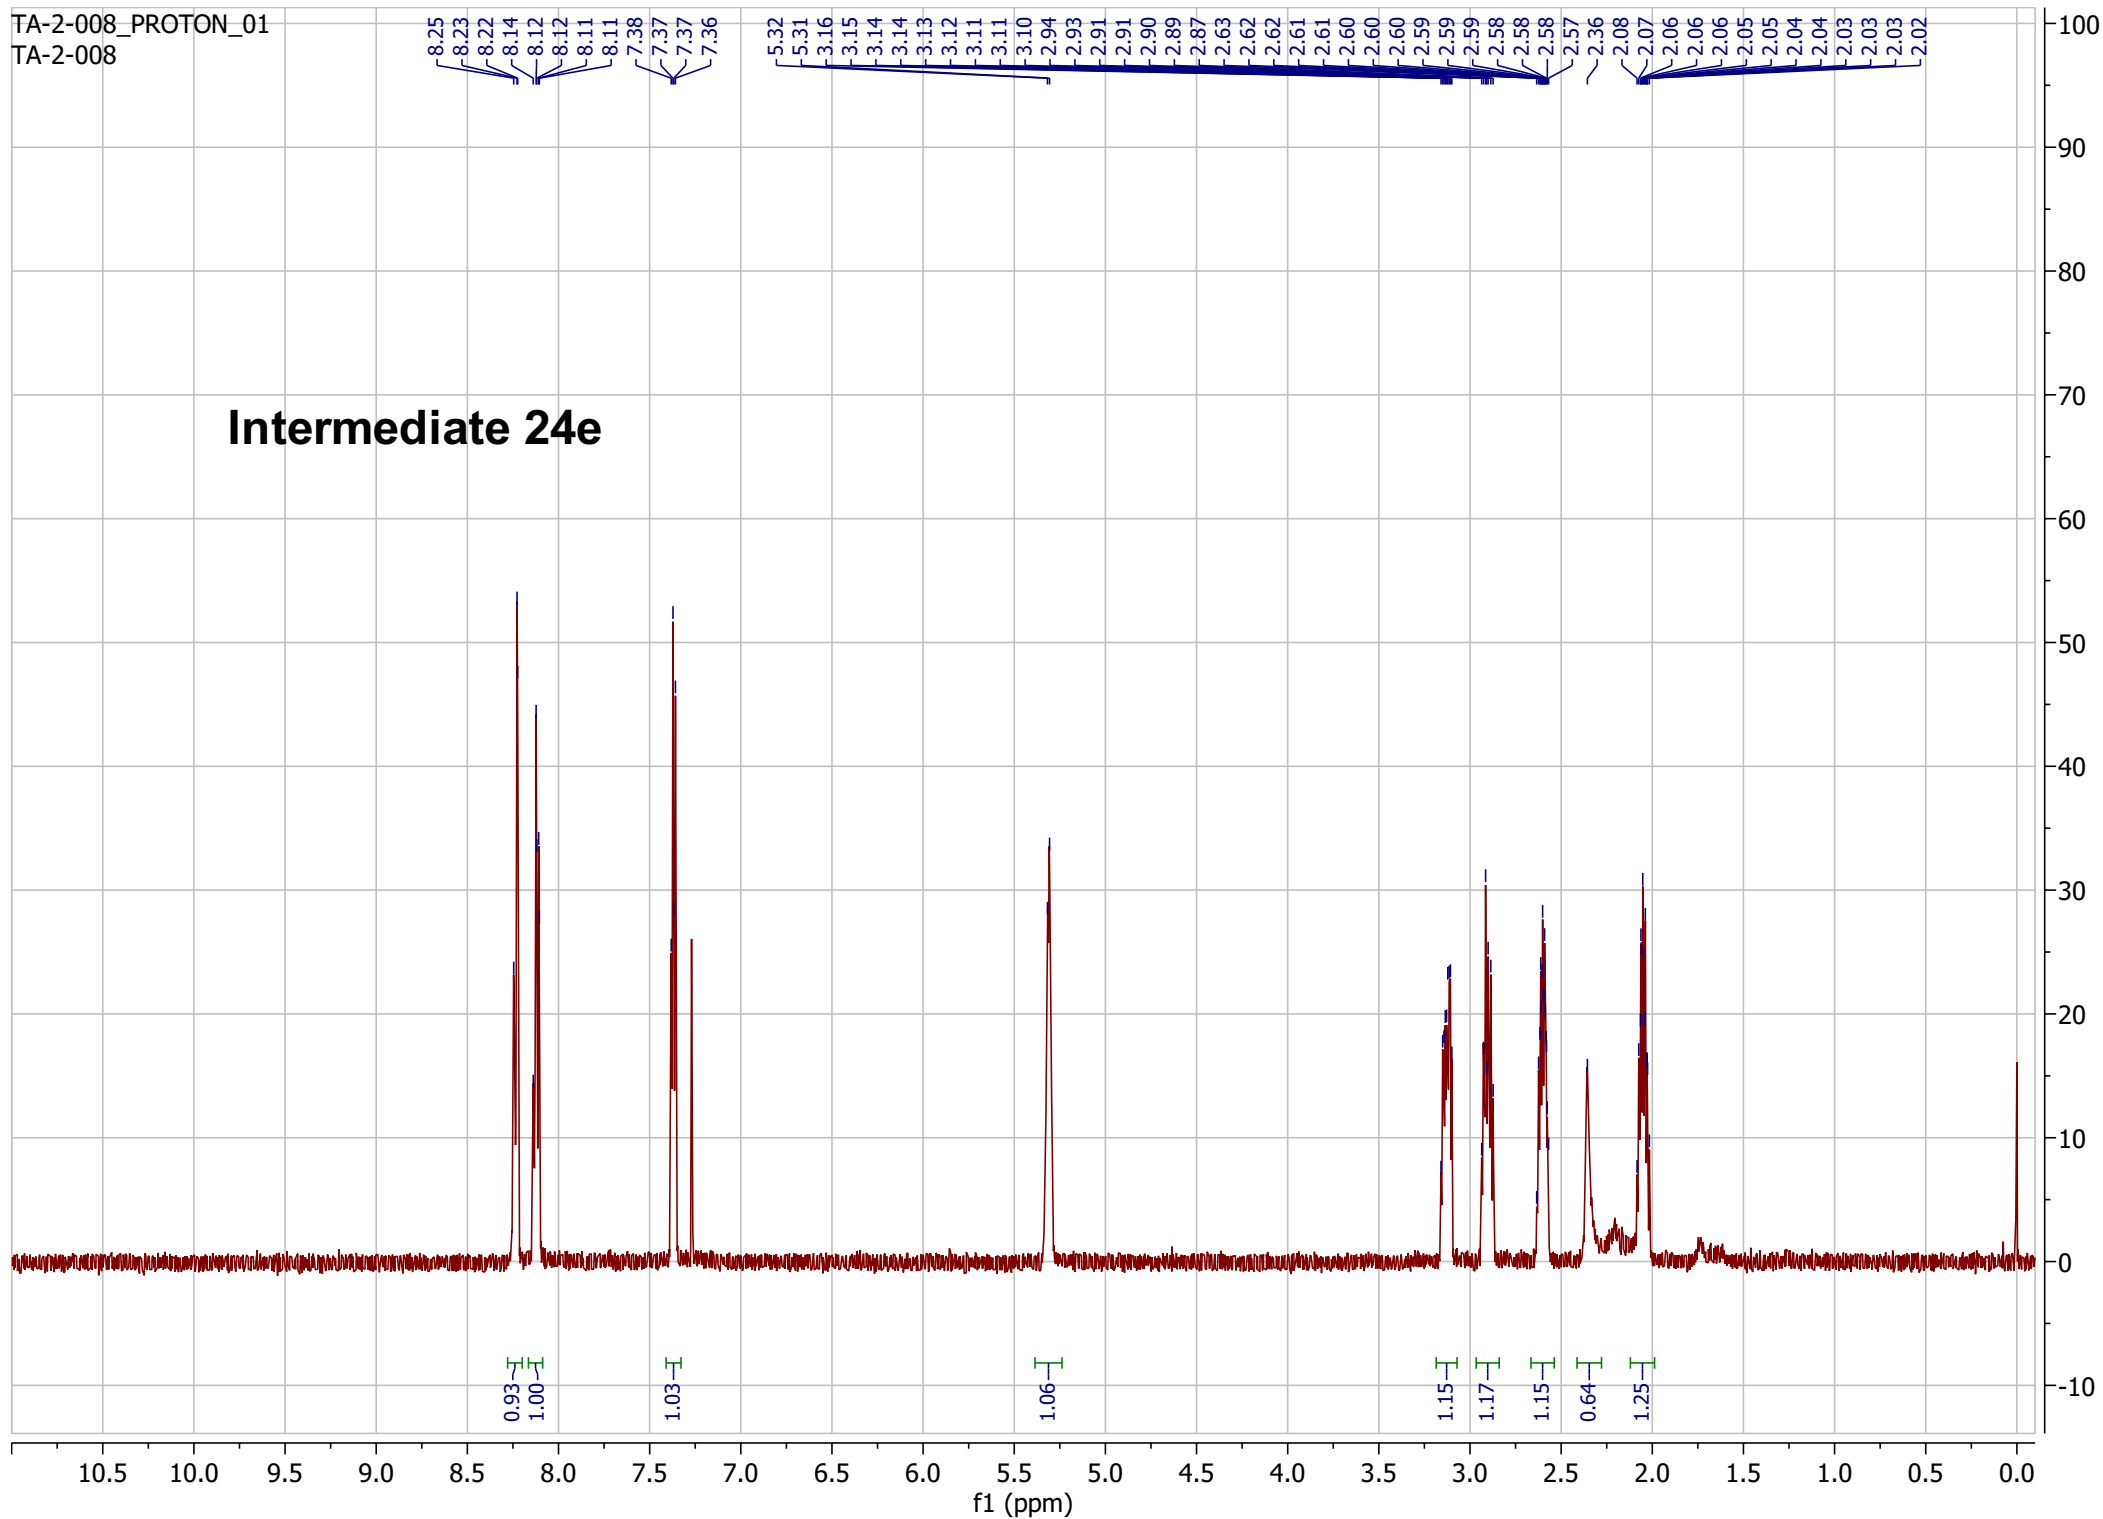

TA-3-026\_PROTON\_9  
TA-3-026

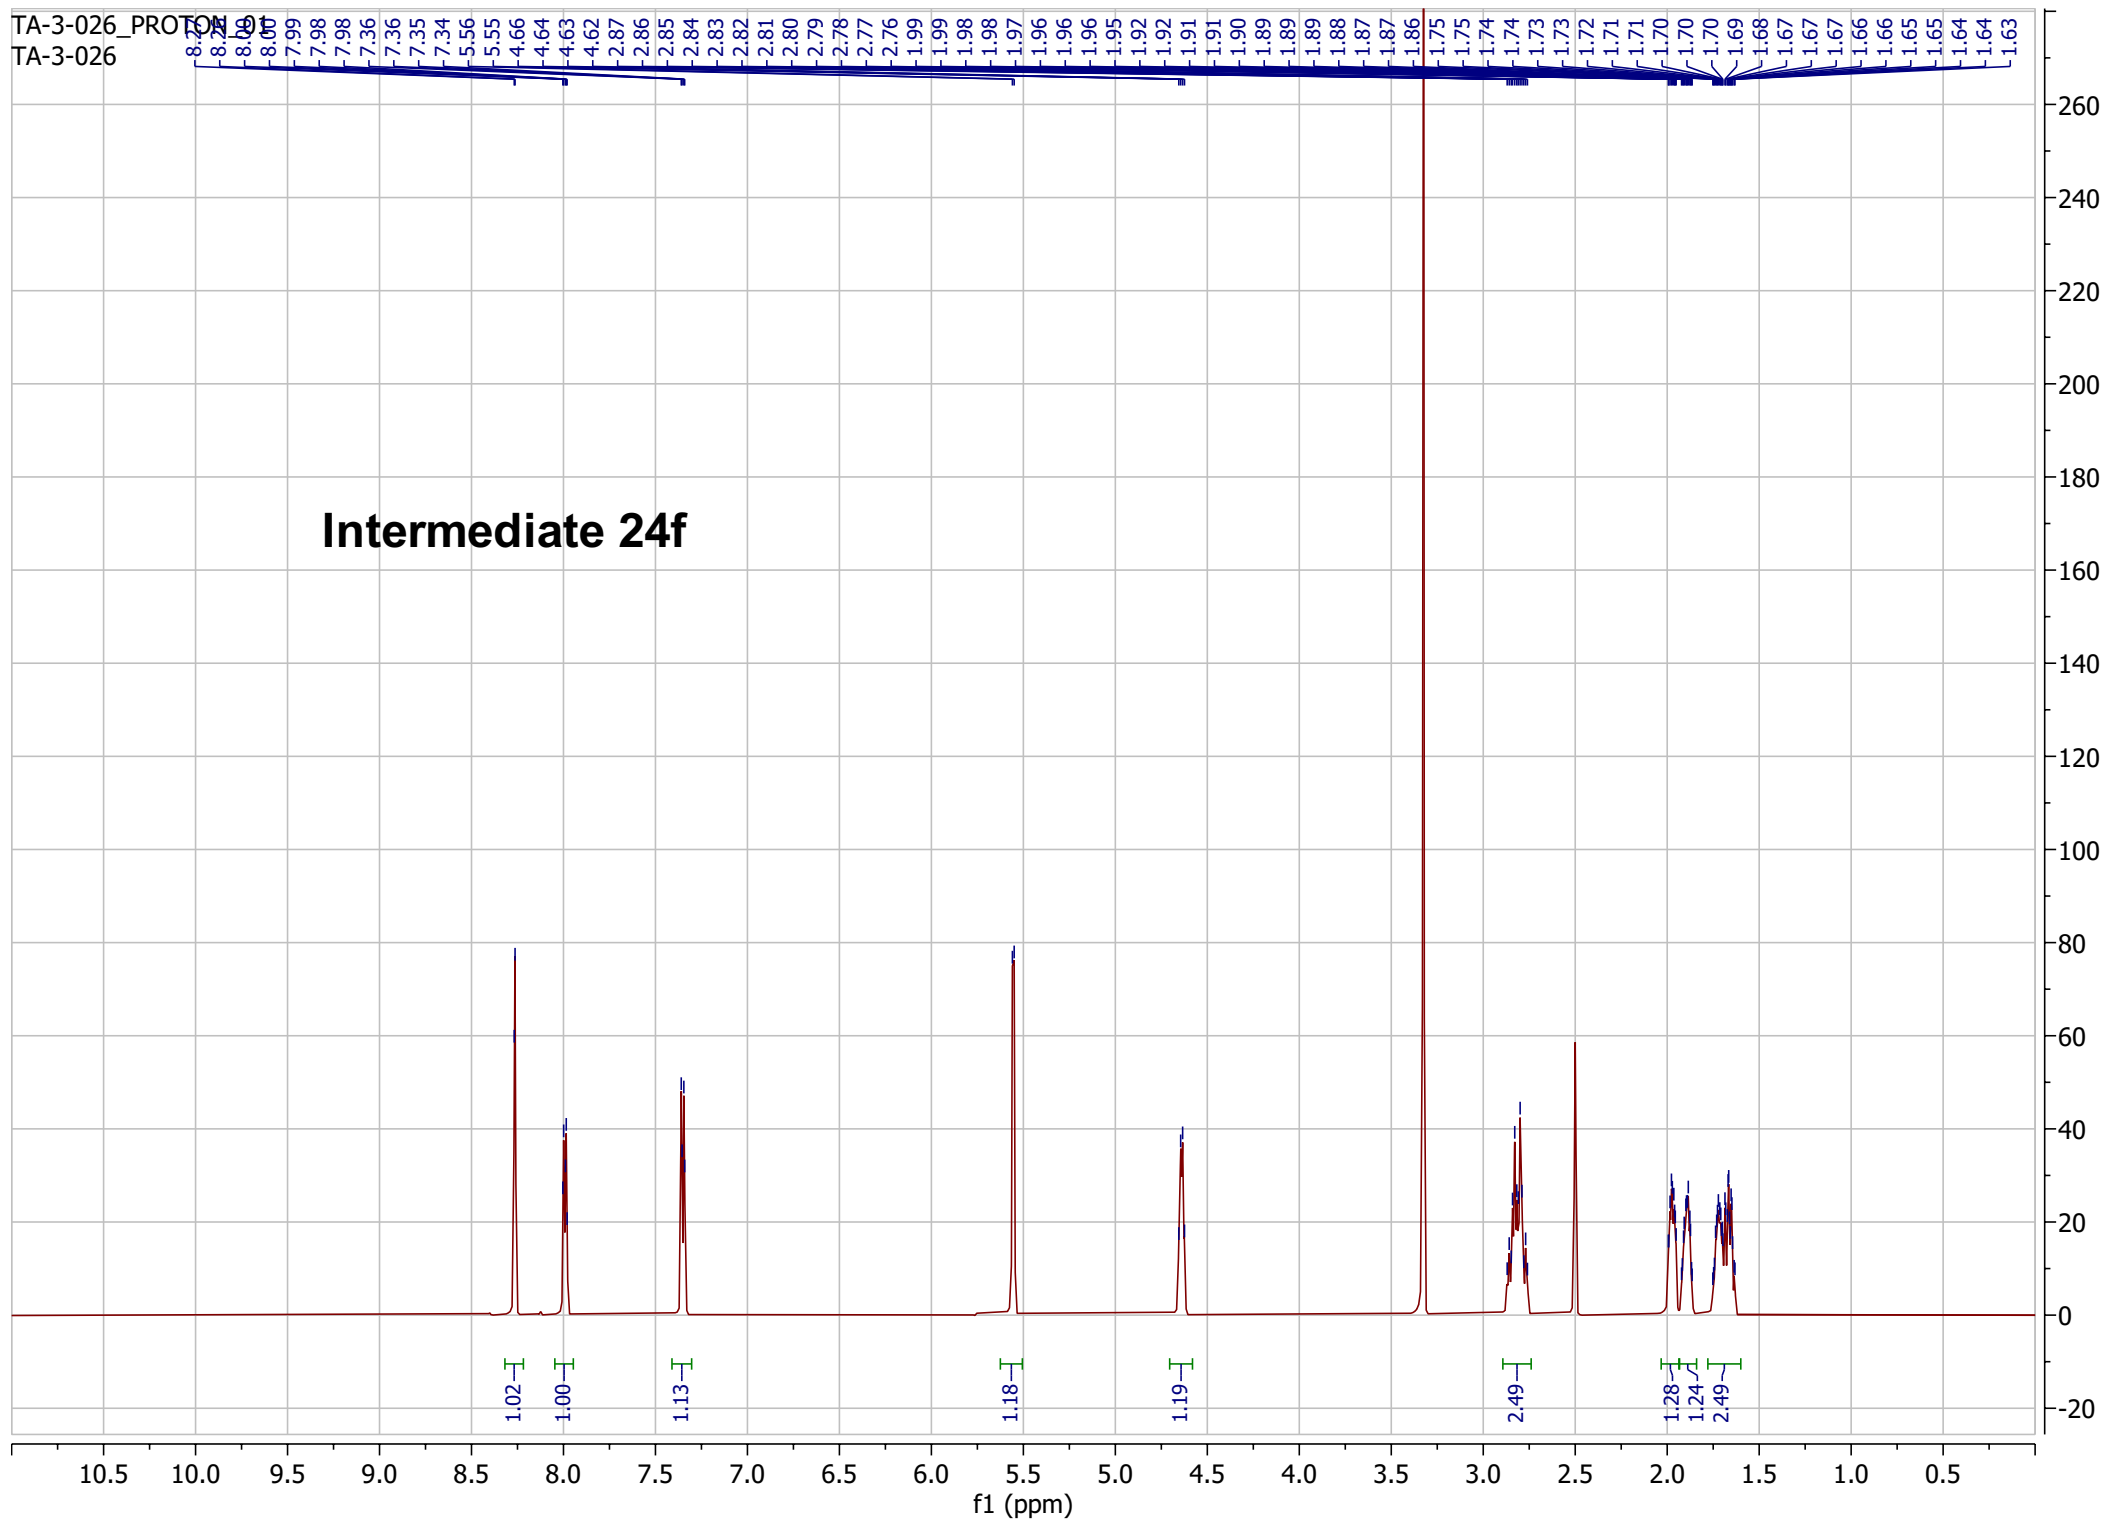

# Intermediate 24g

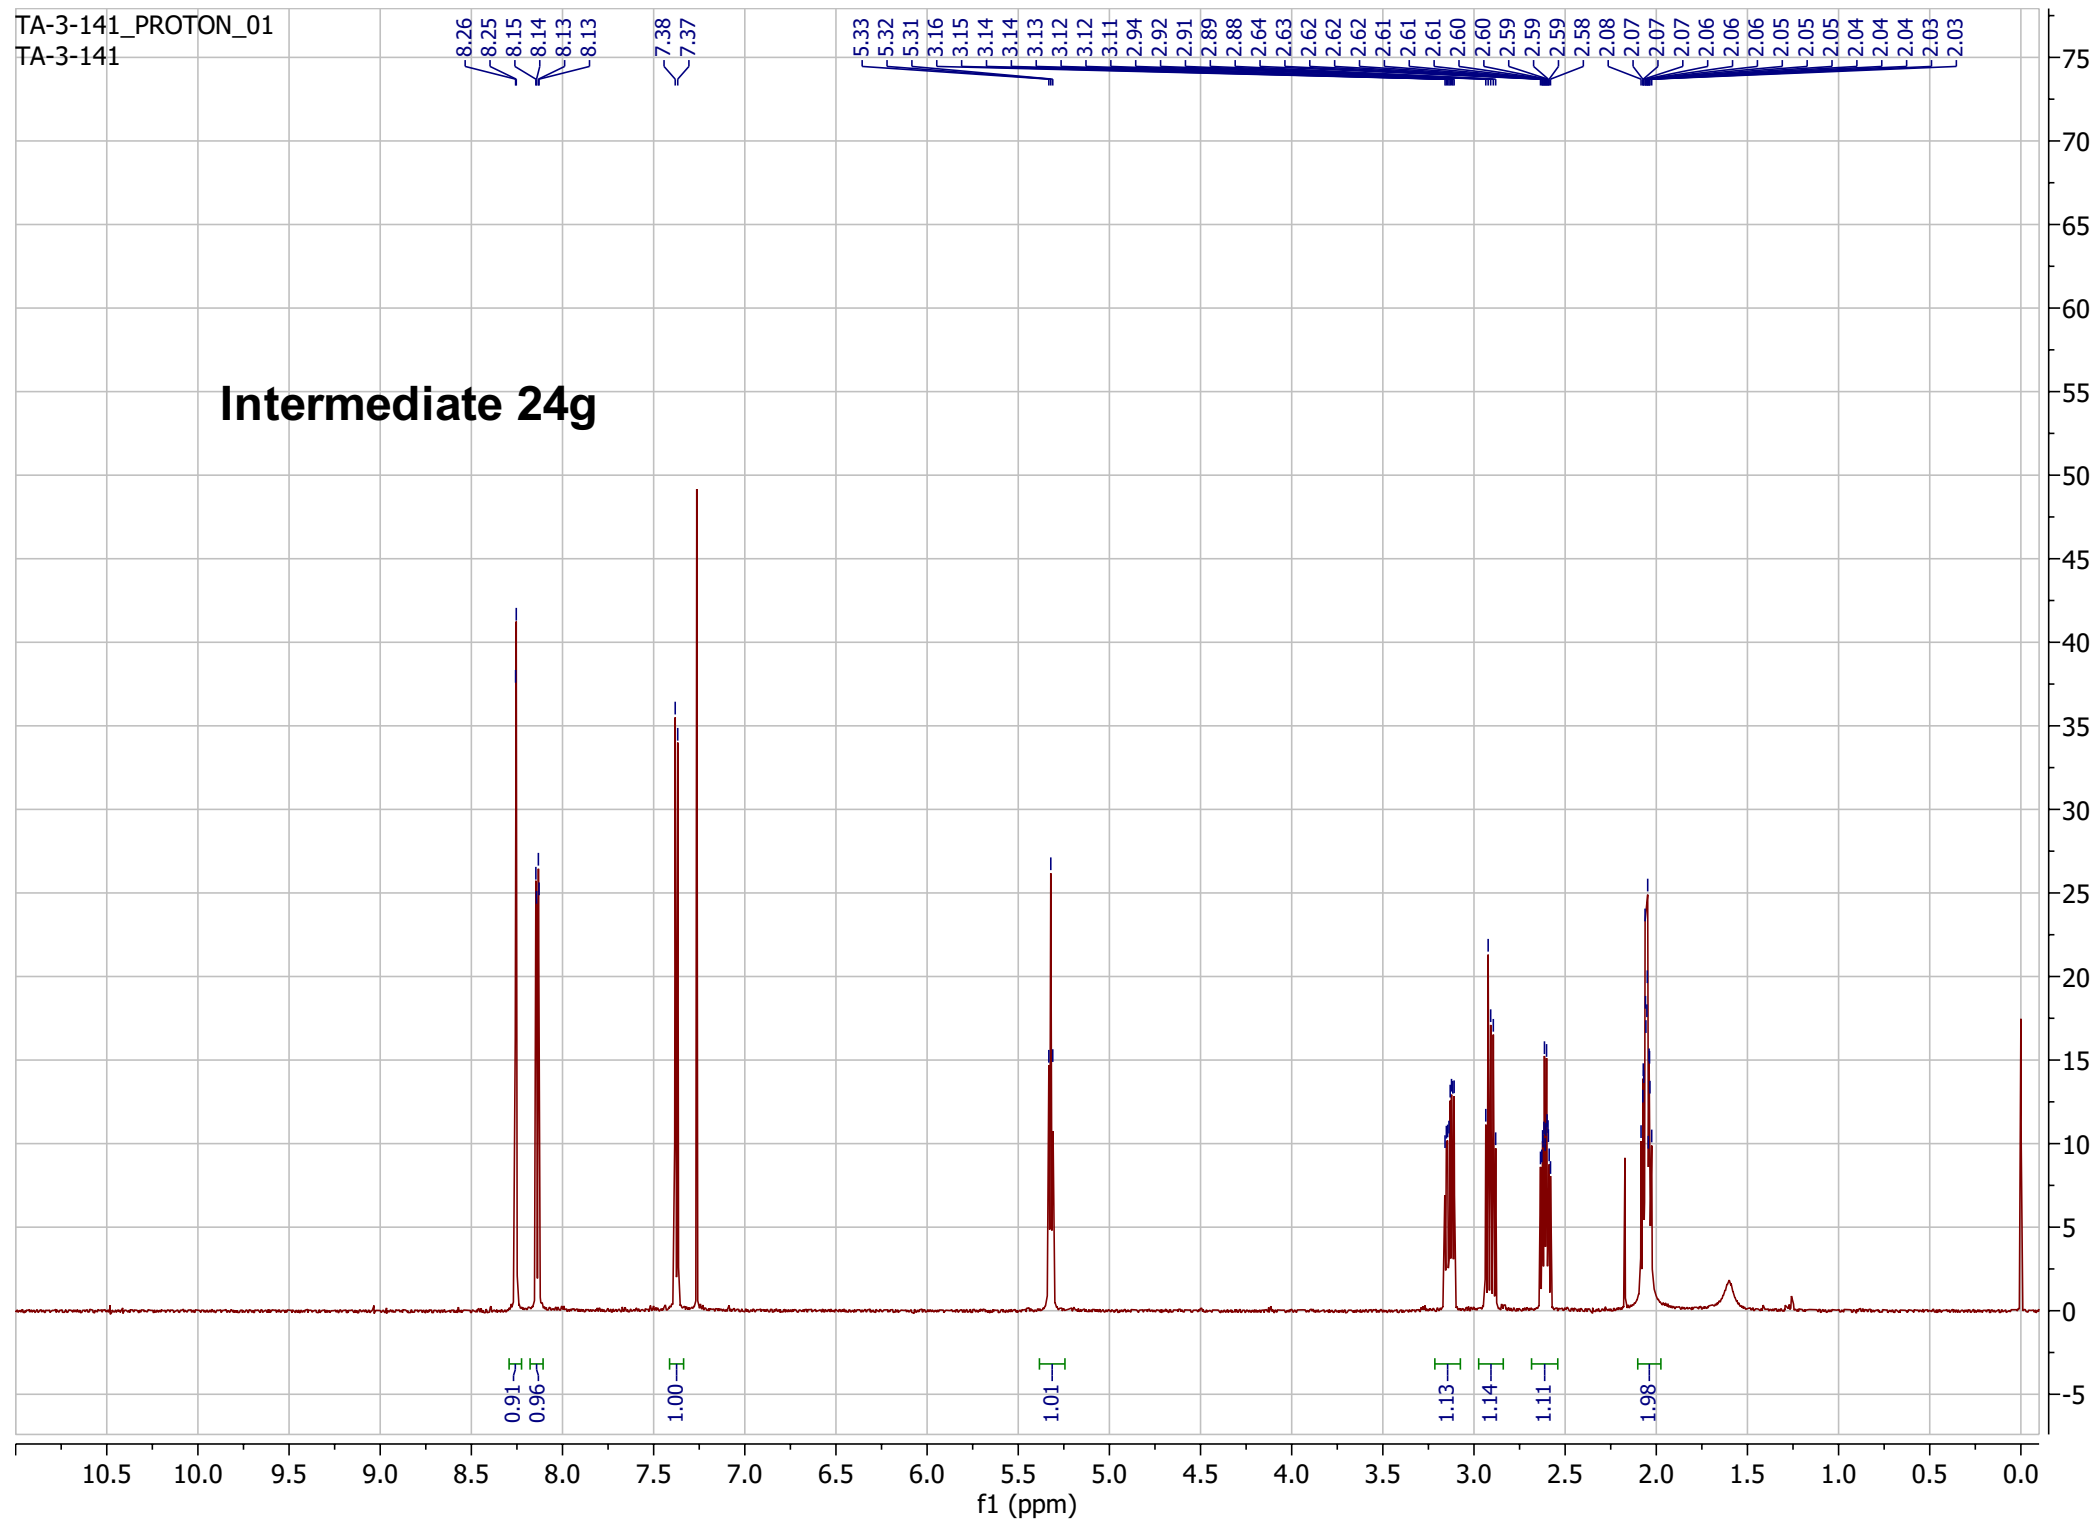

TA-3-140\_PROTON\_01  
TA-3-140

# Intermediate 24h

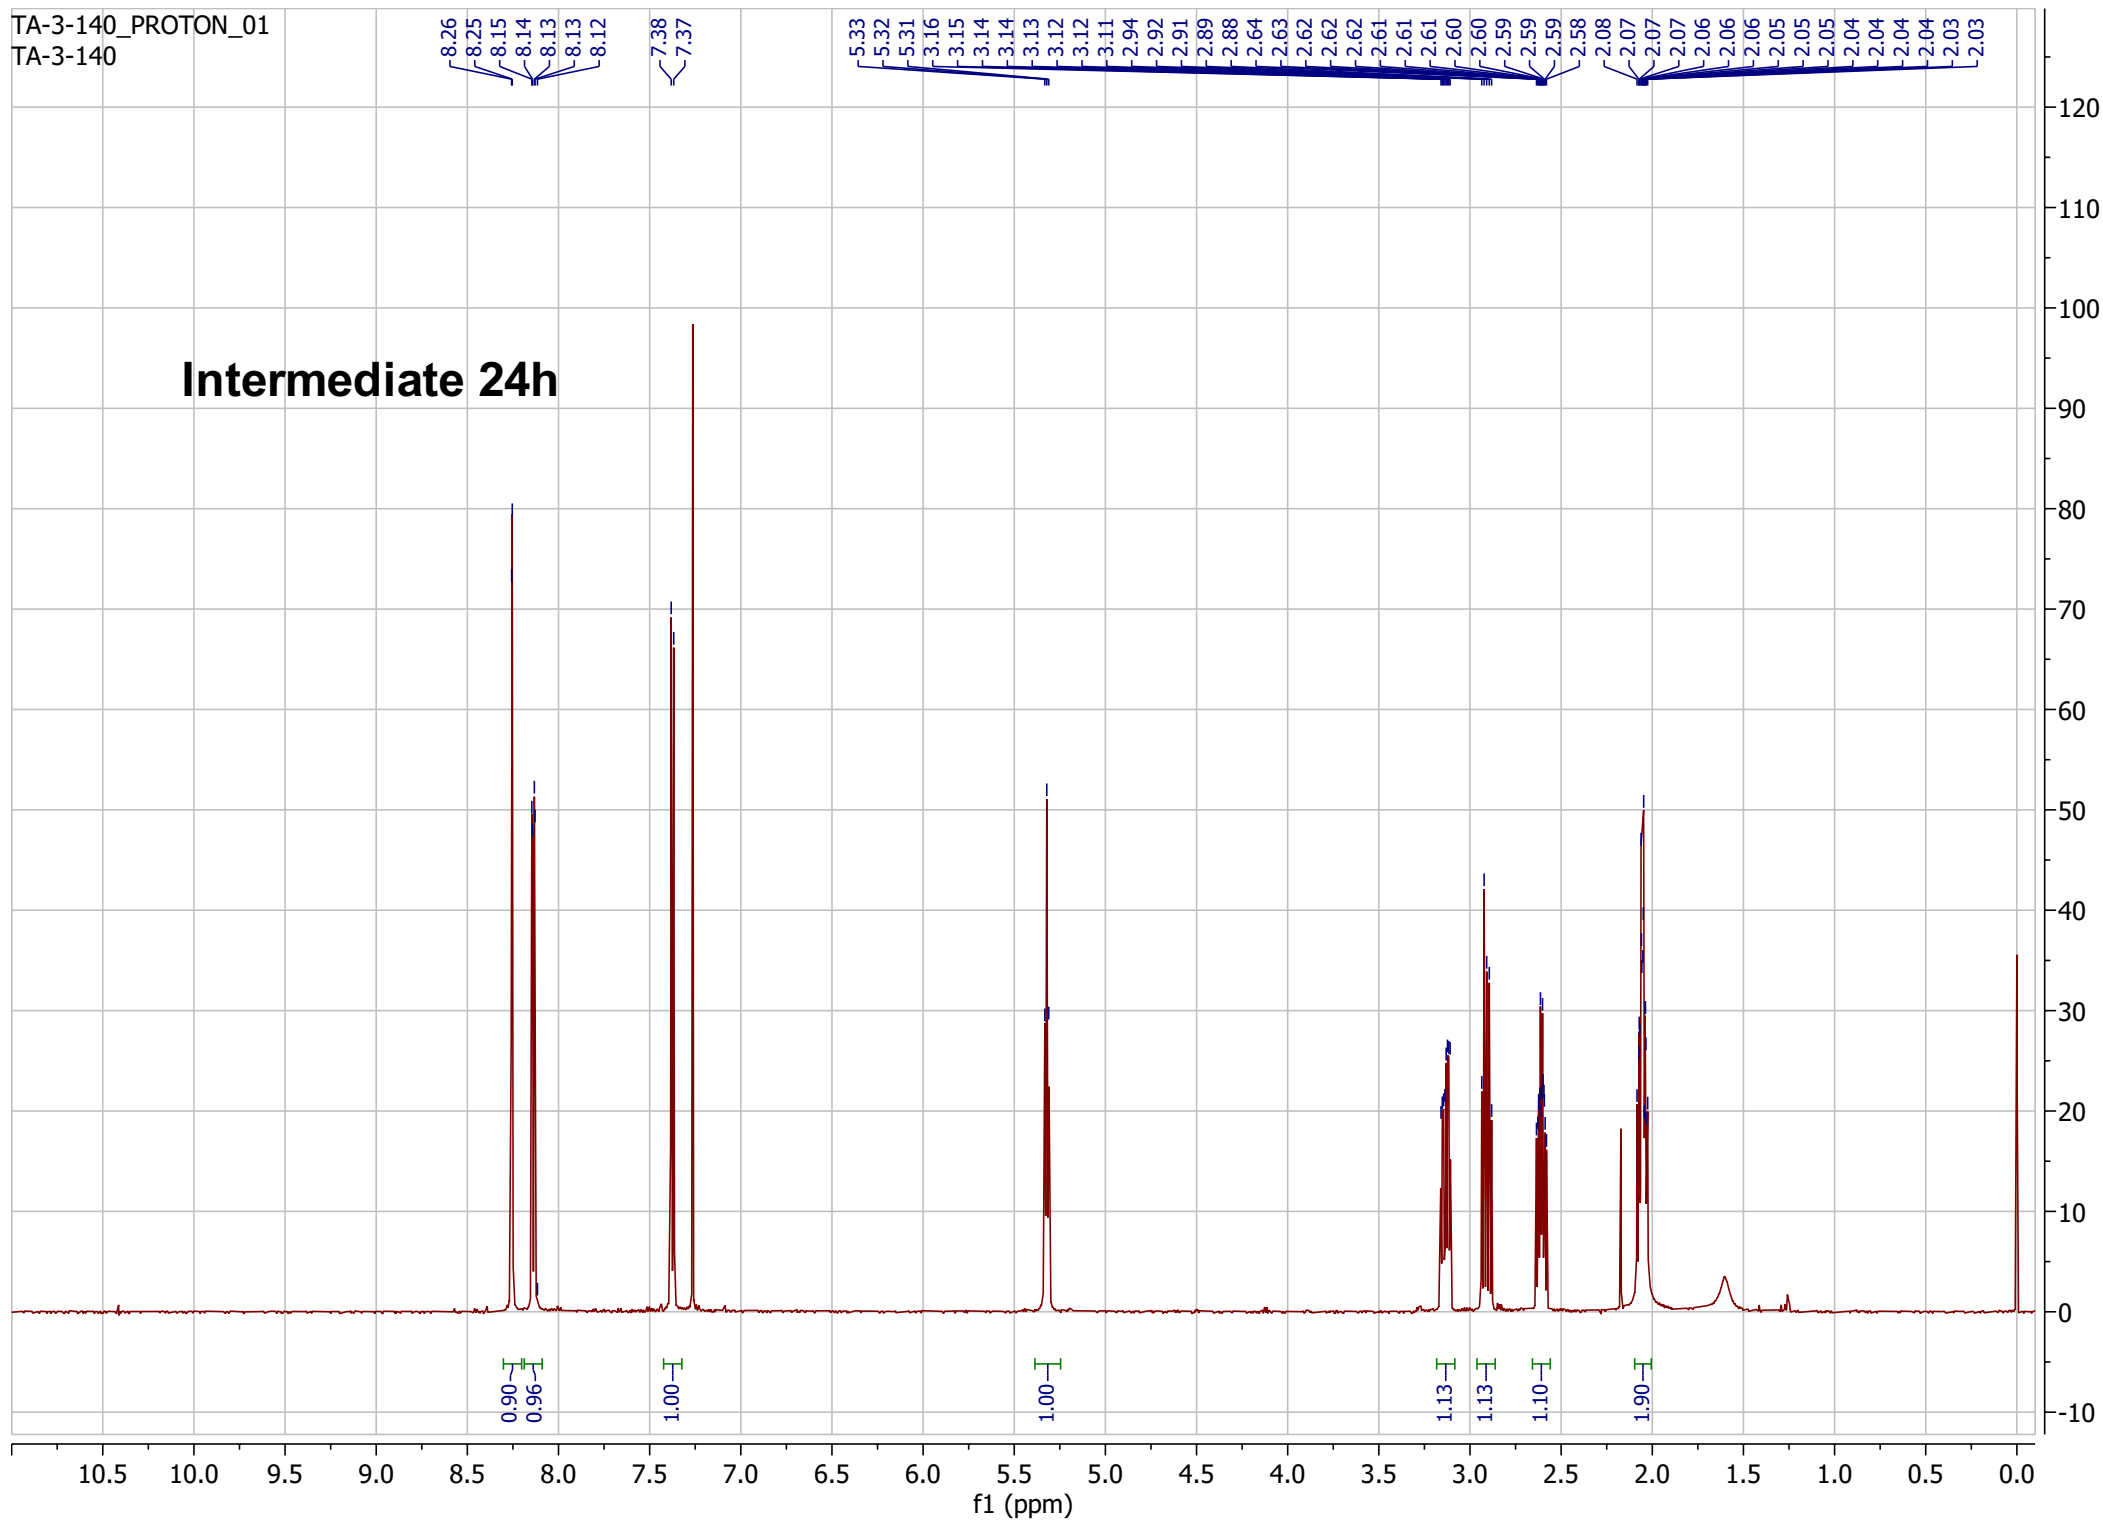

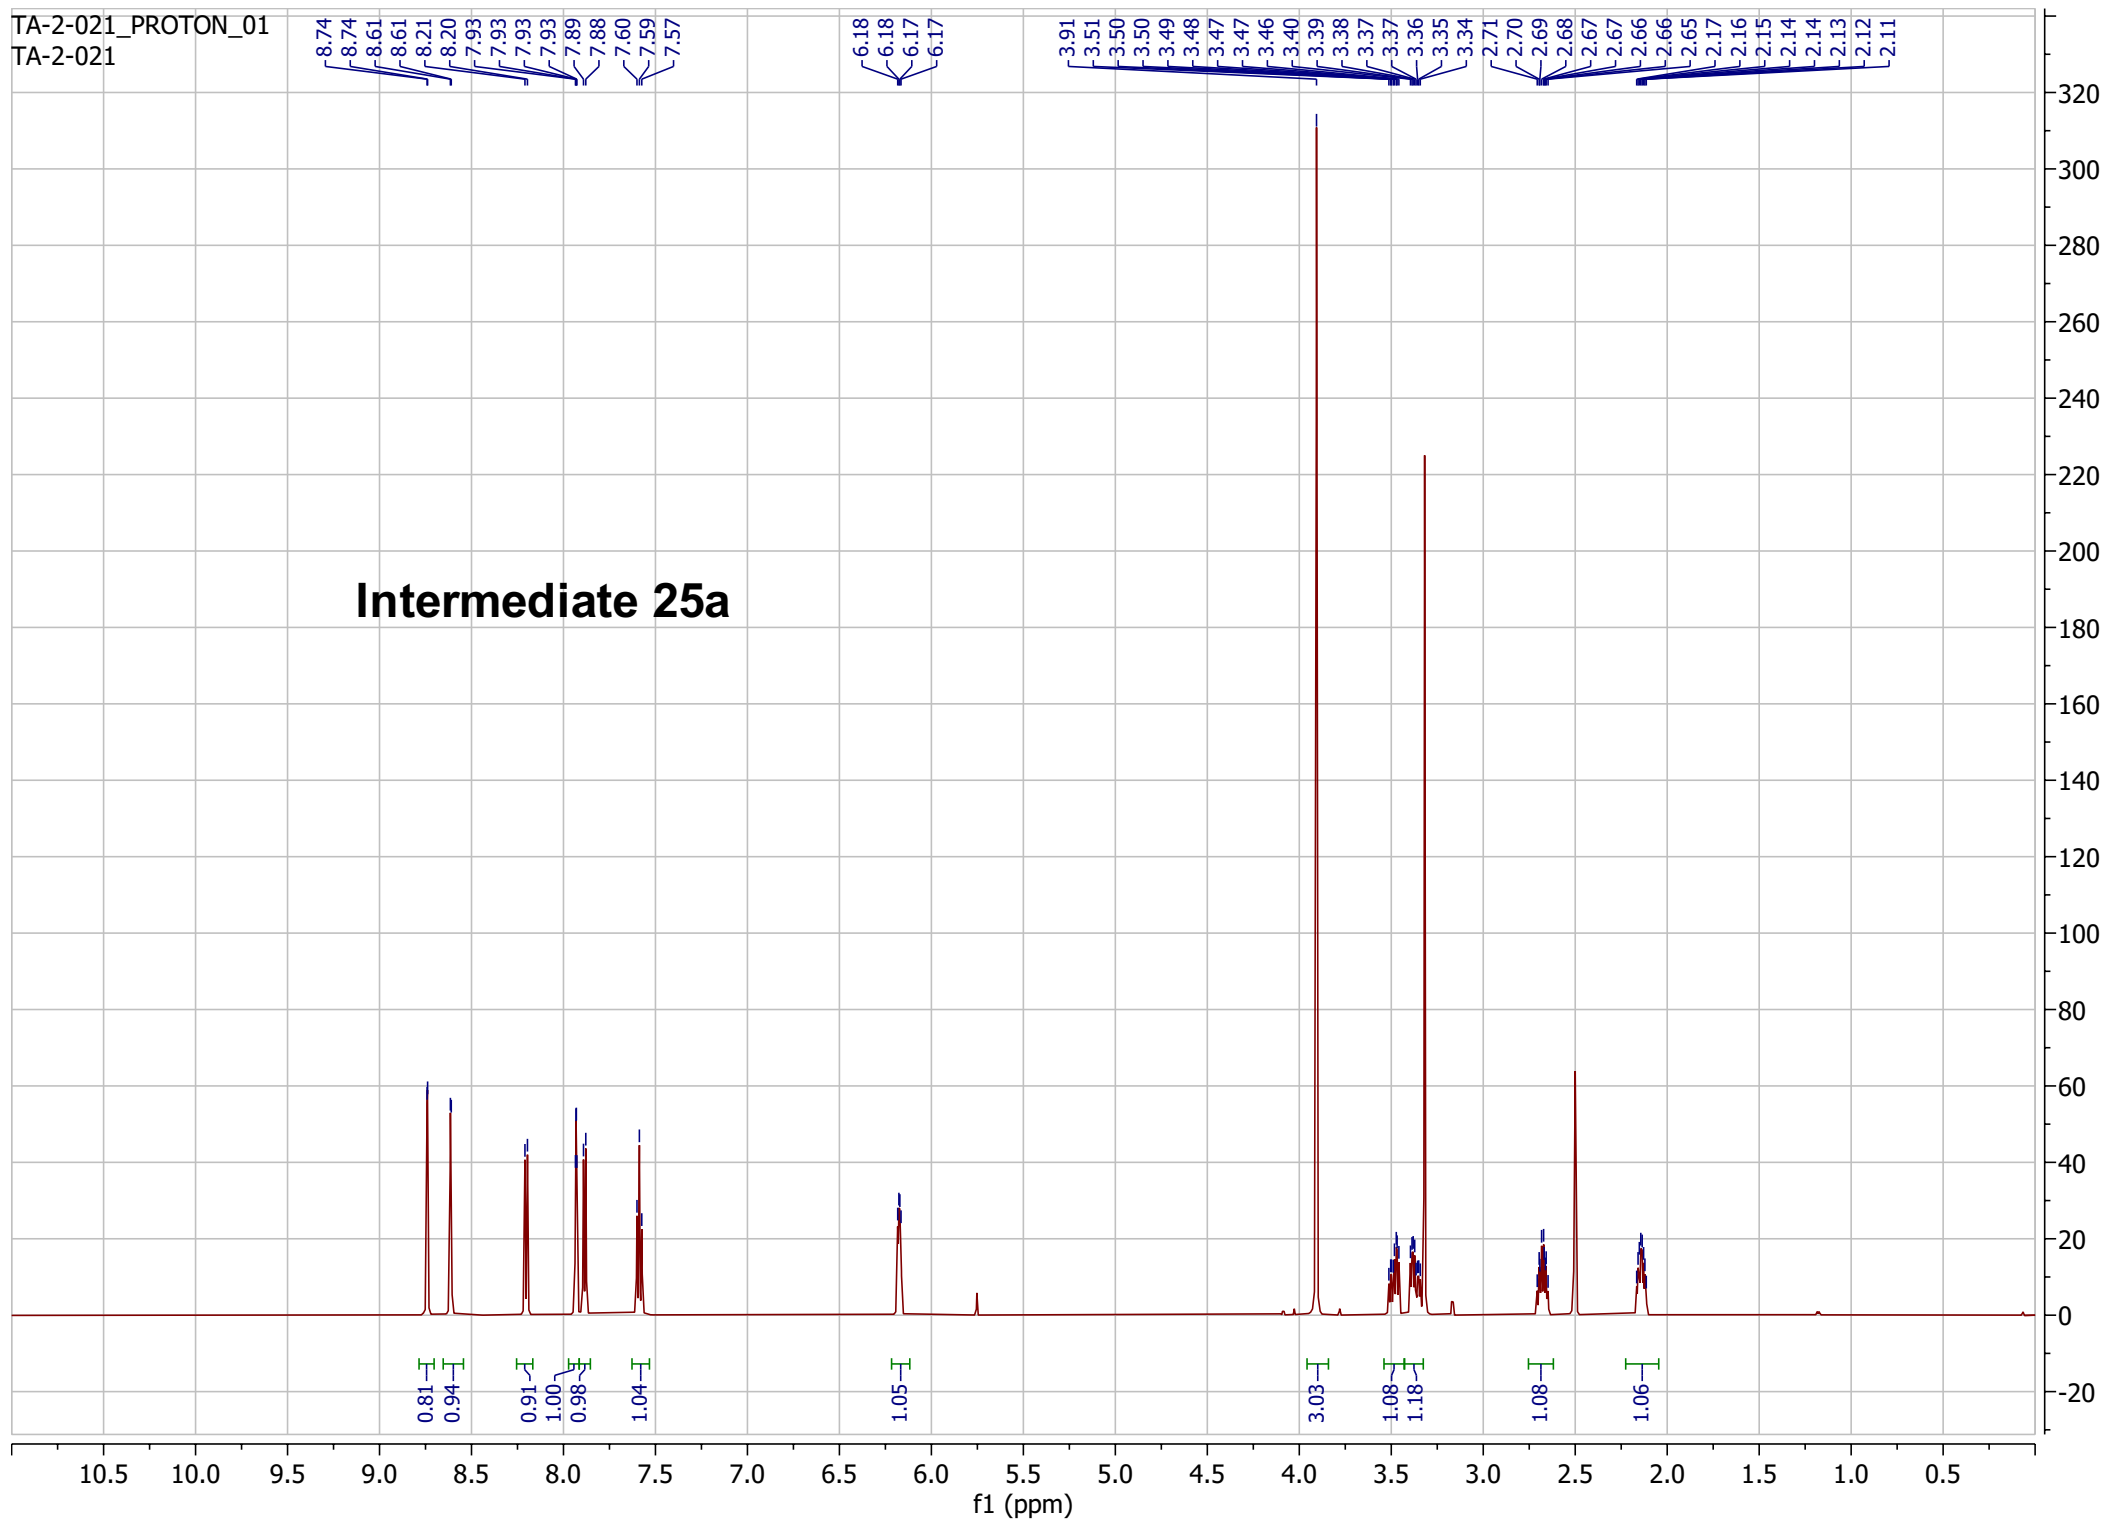

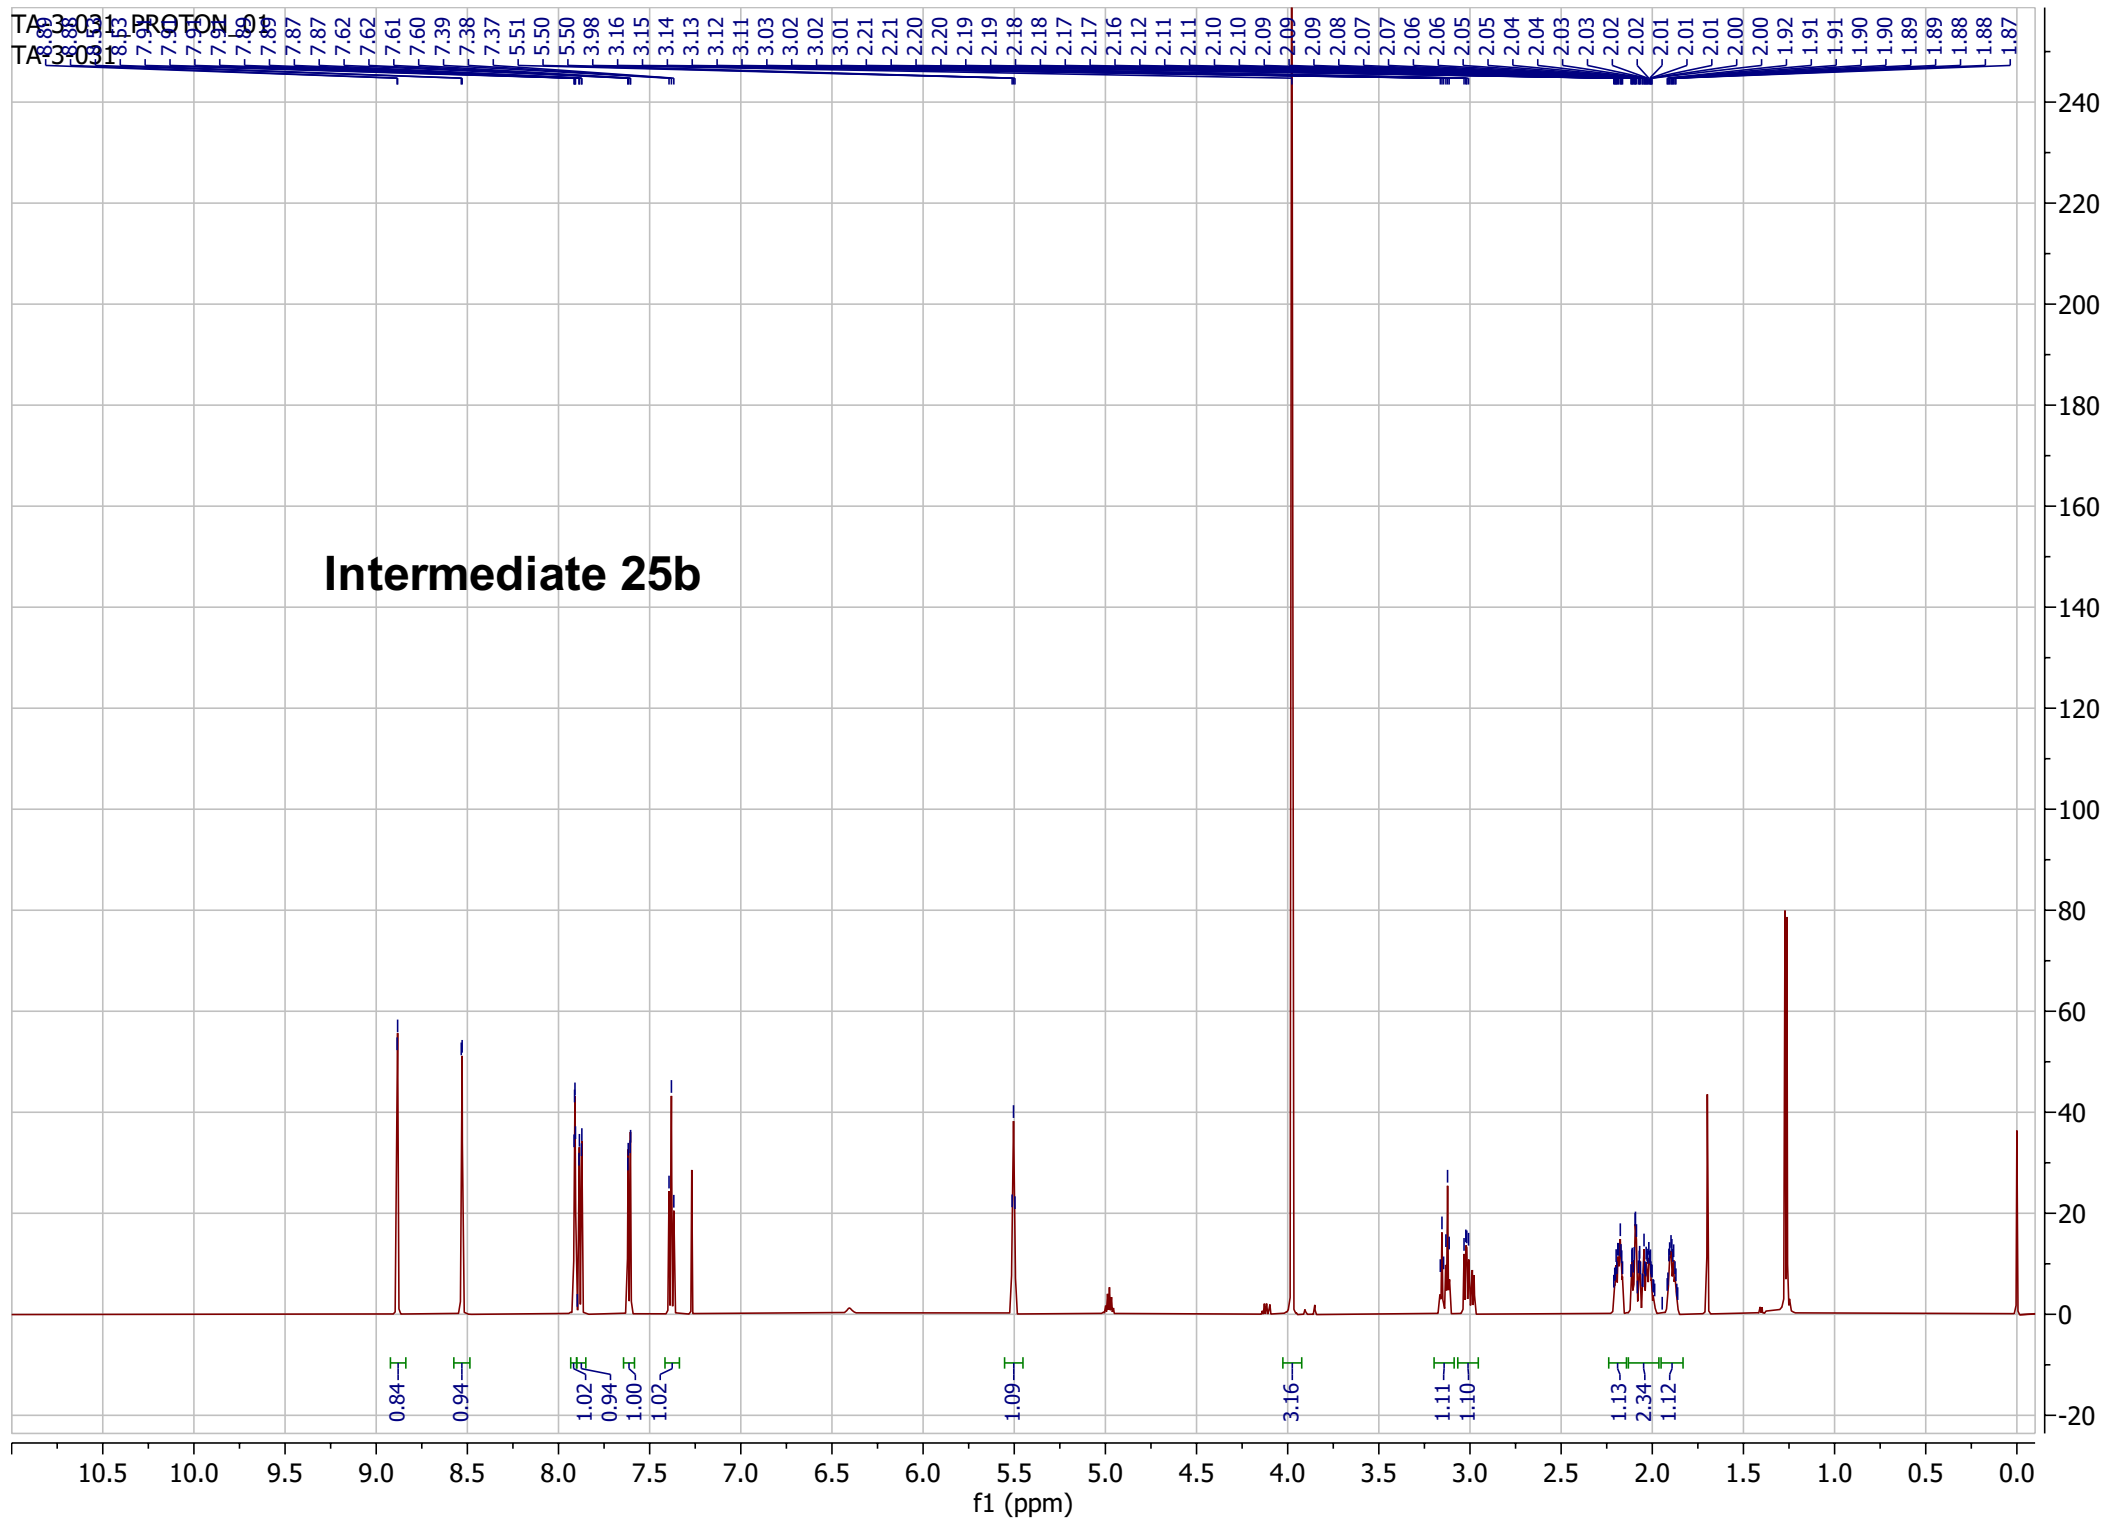

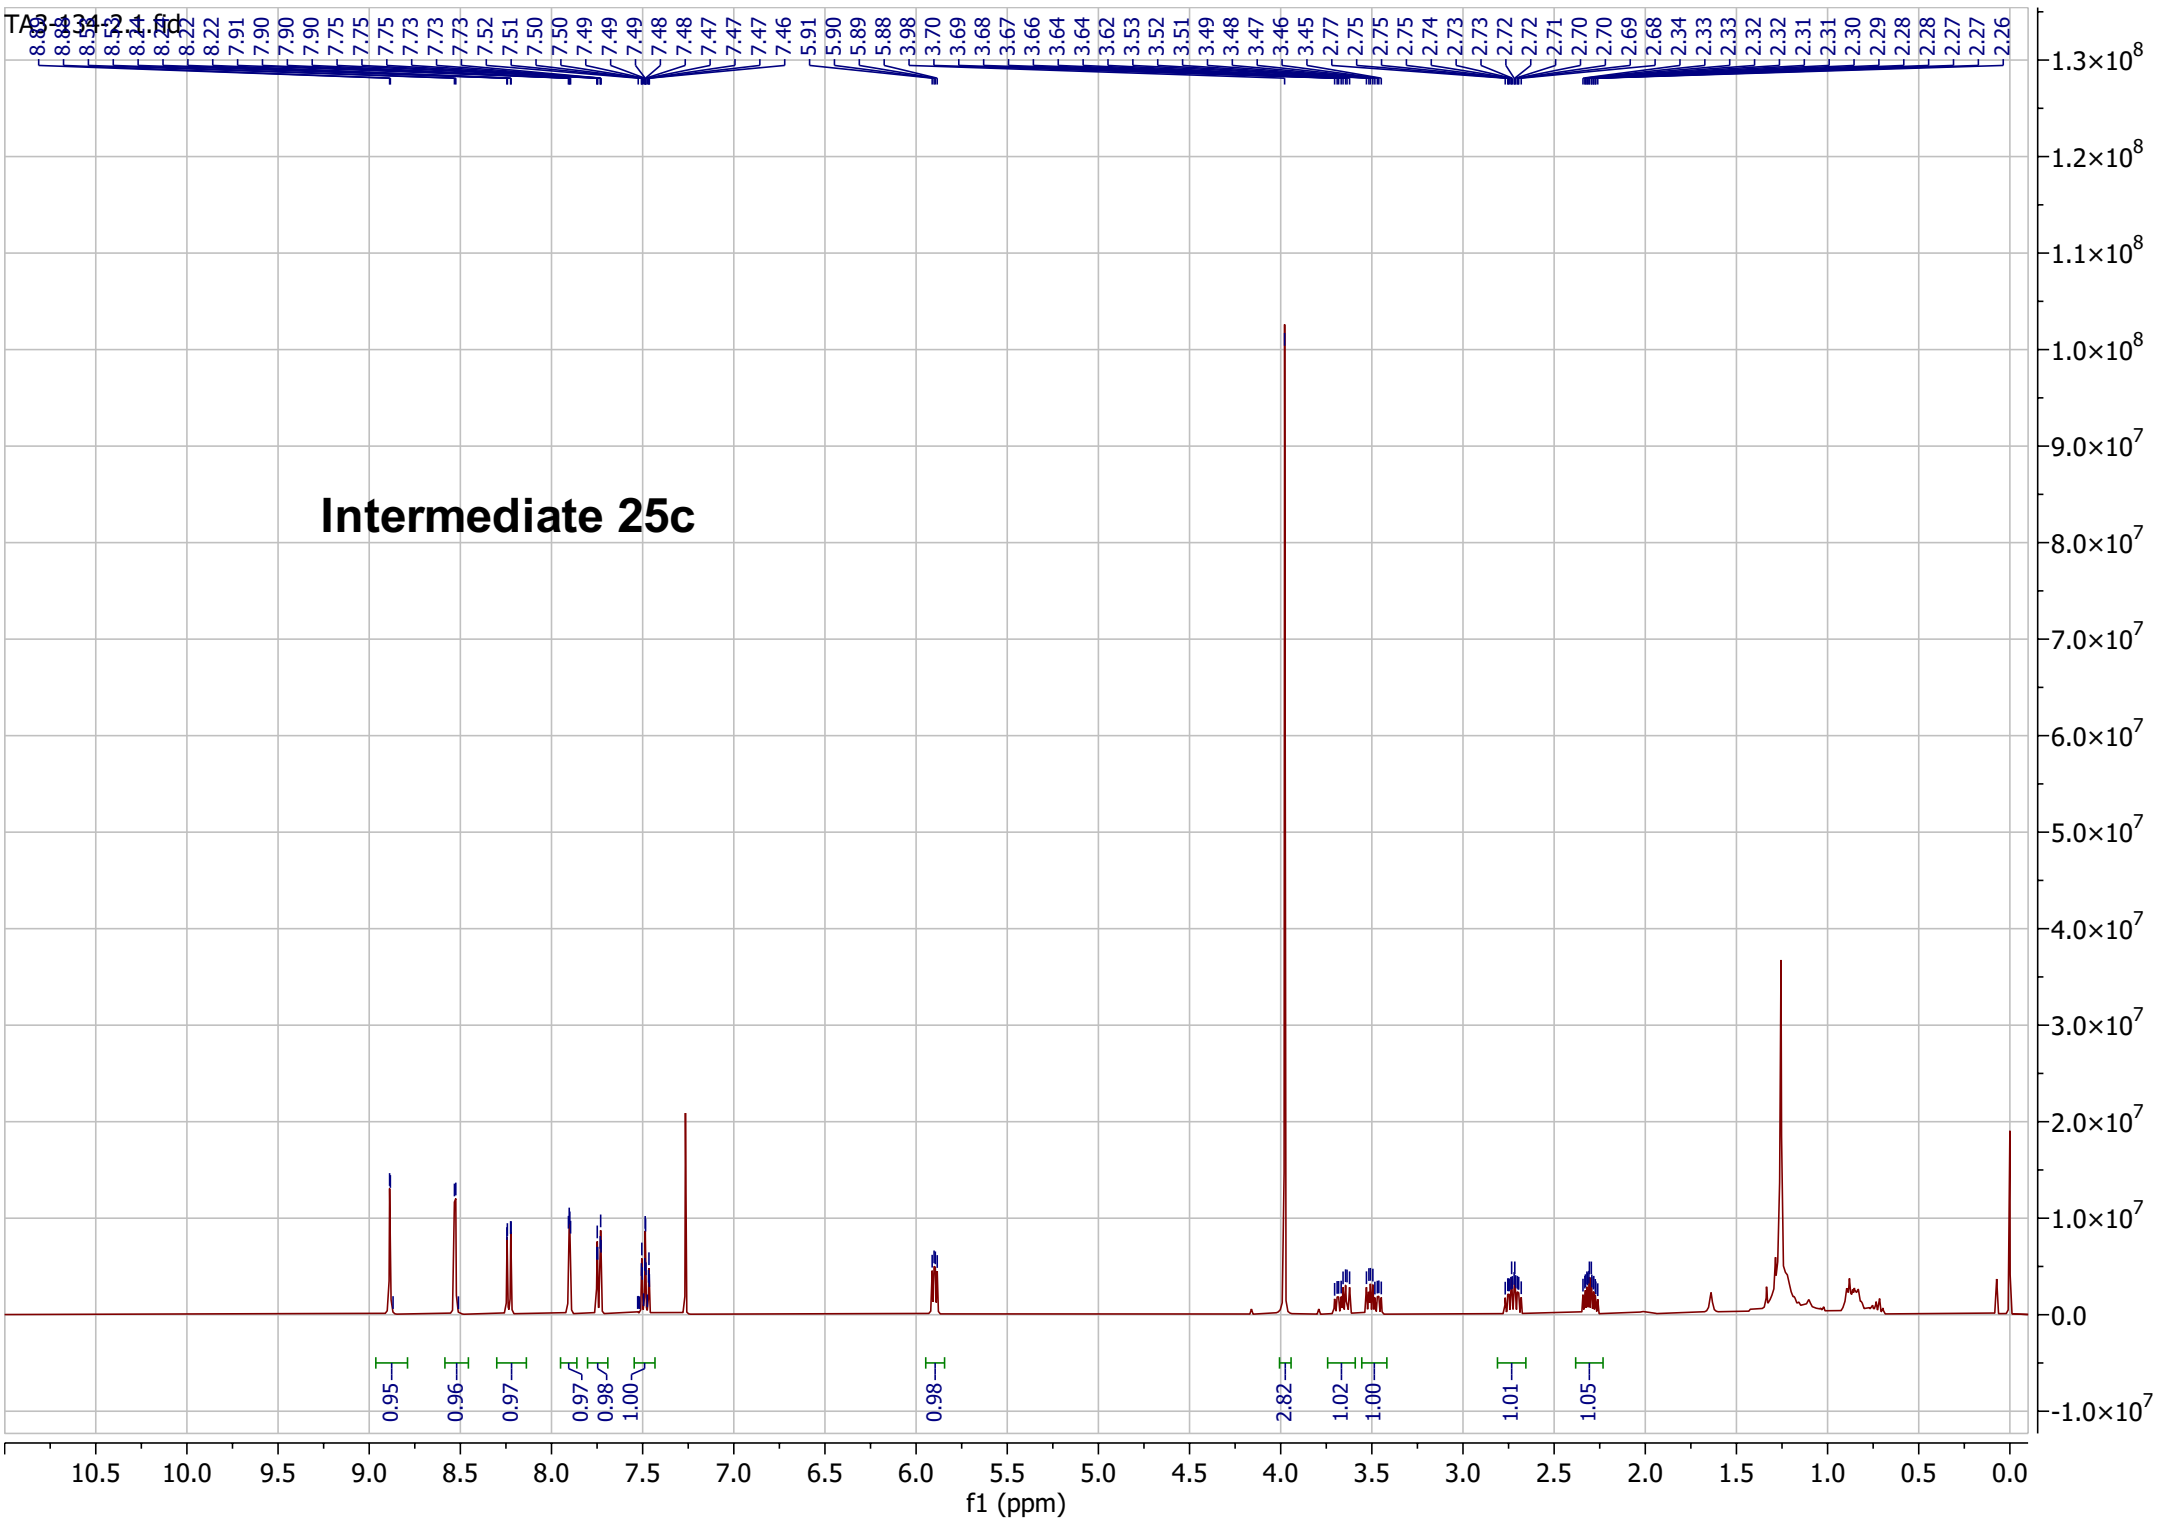



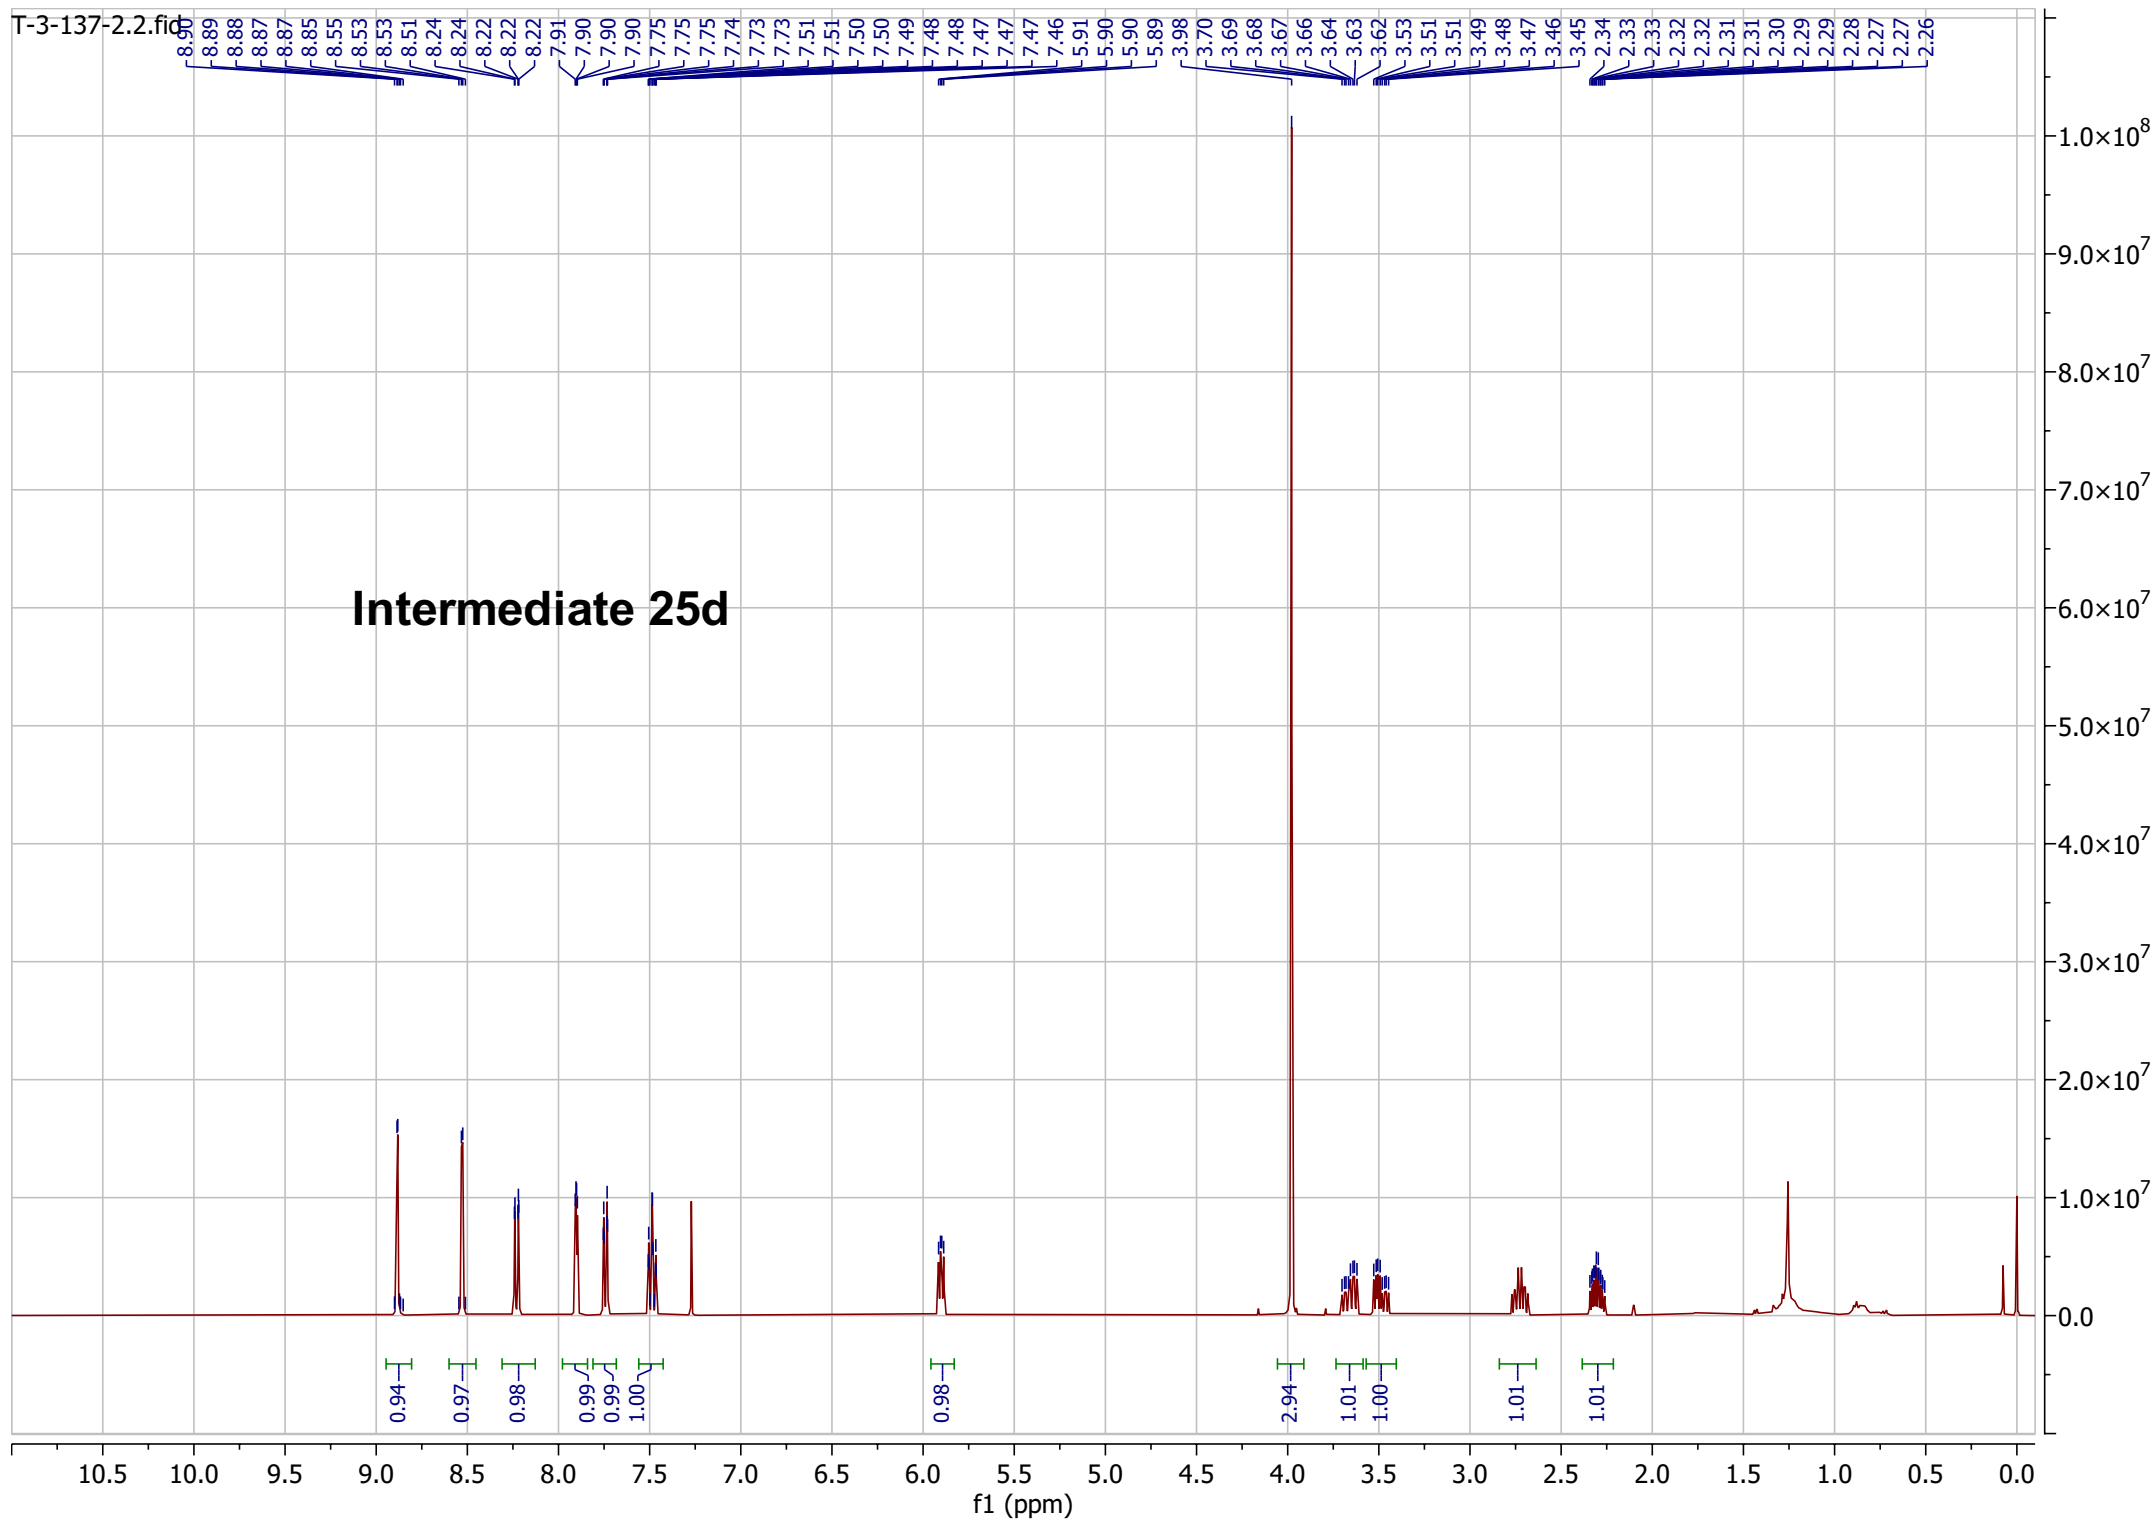

# Intermediate 25e

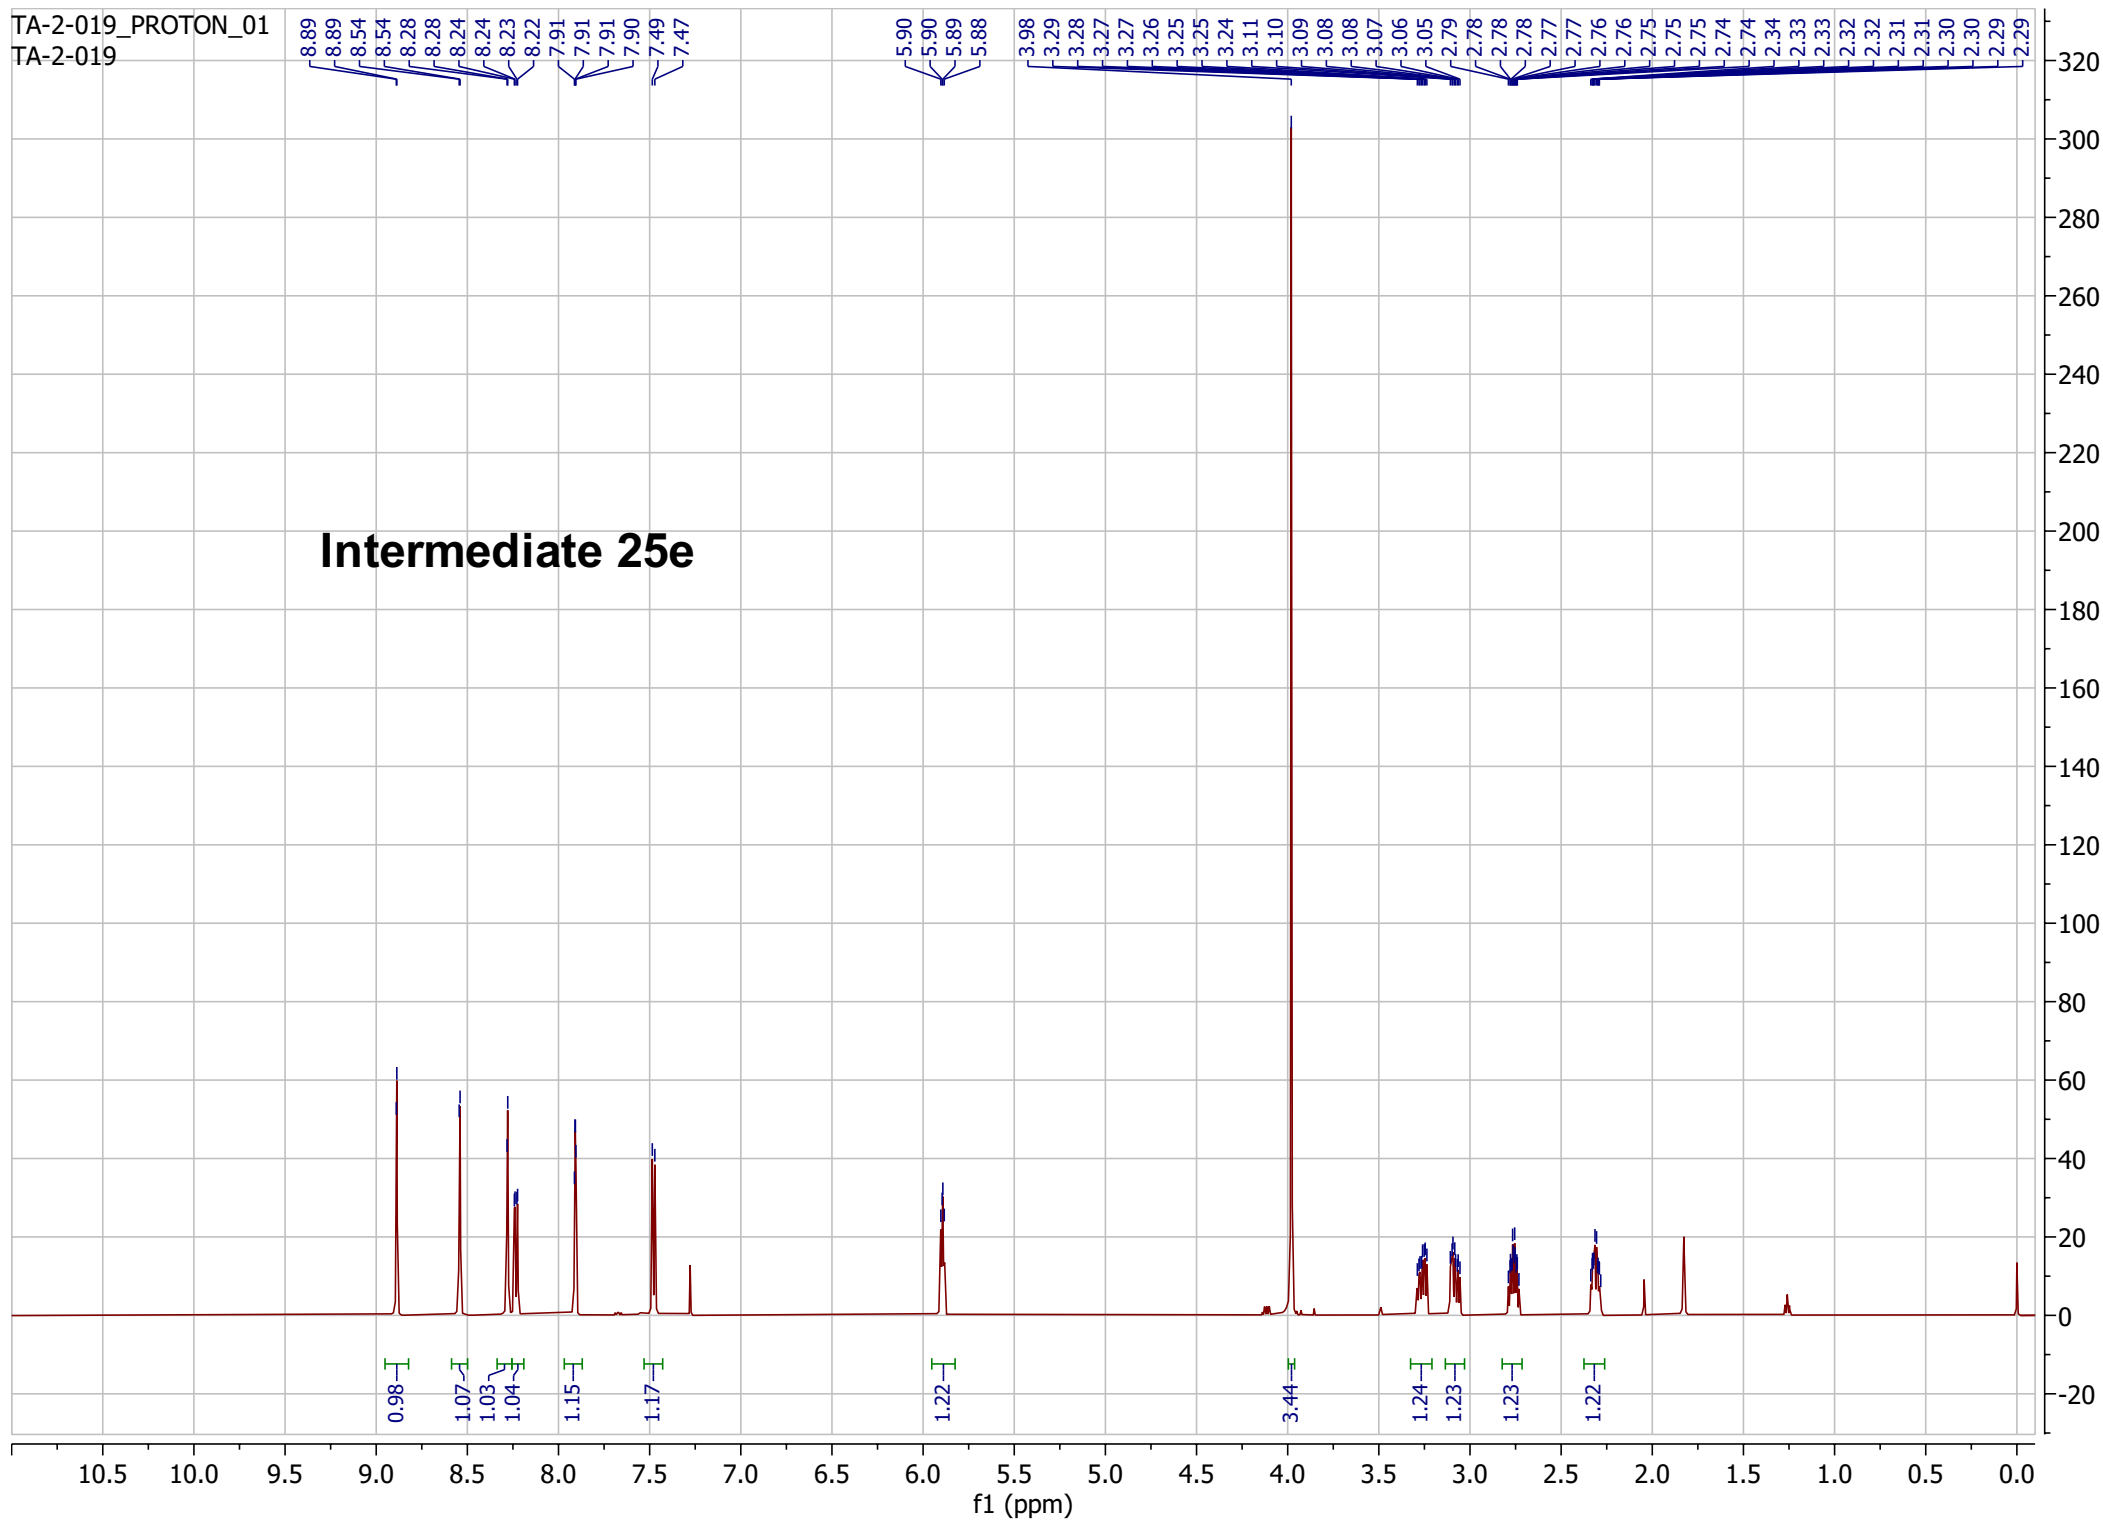

TA-3-032\_PROTON\_01  
TA-3-032

# Intermediate 25f

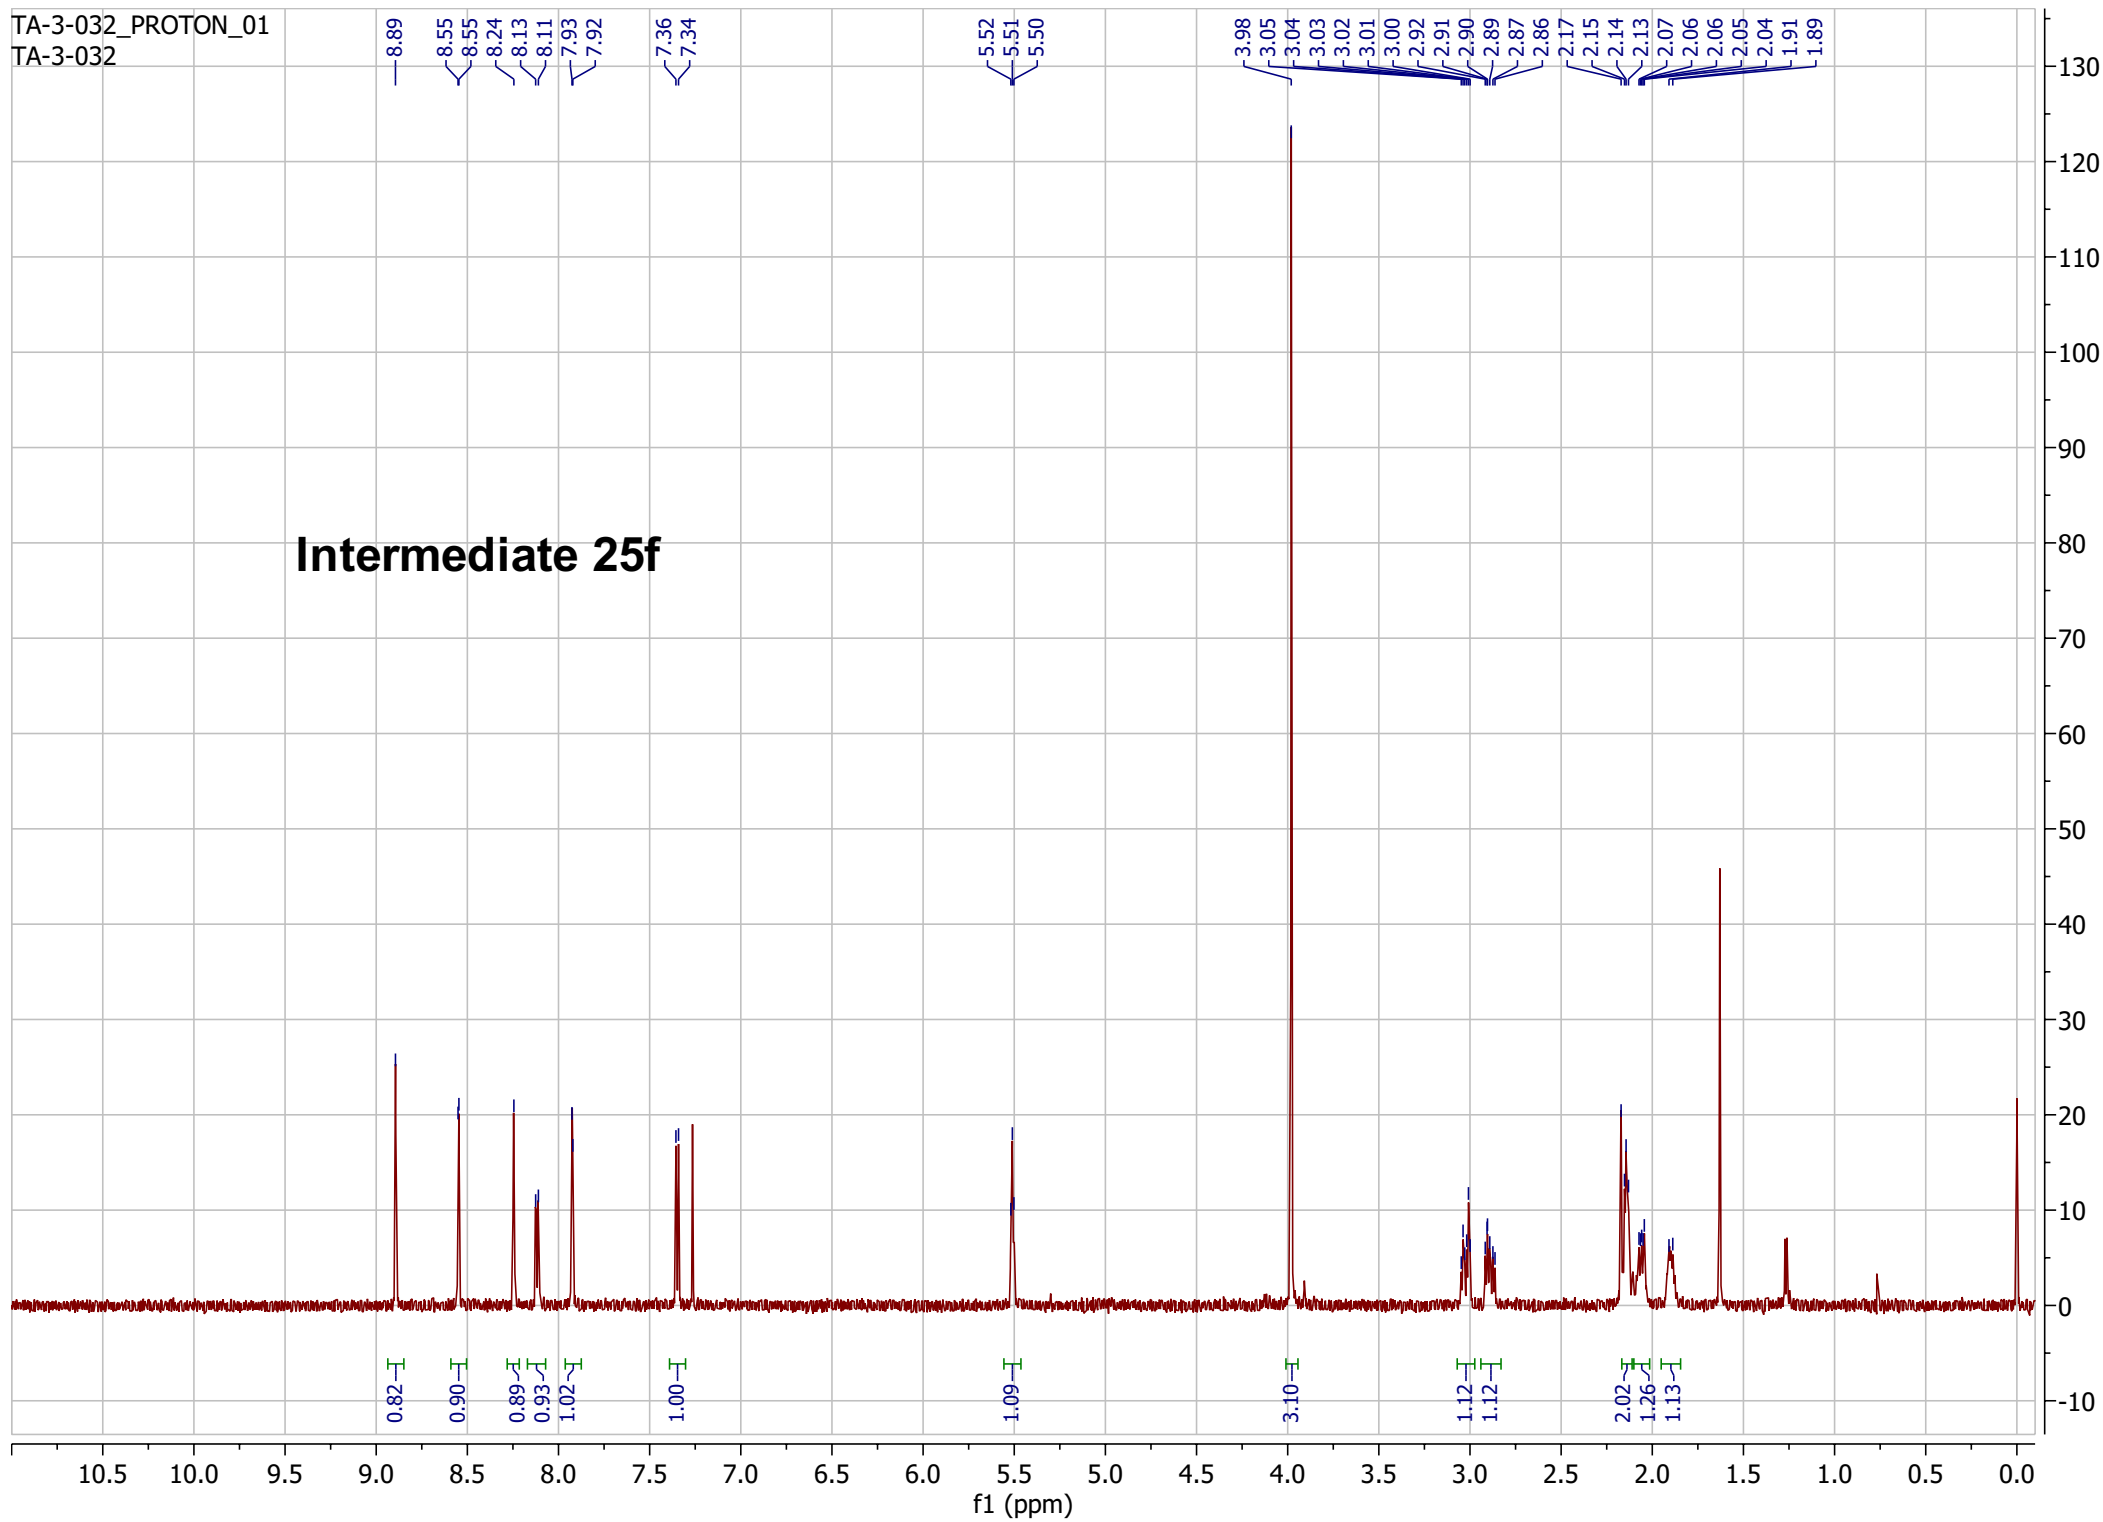

TA-3-144

TA-3-144\_PROTON\_01  
TA-3-144

Intermediate 25g

Chemical shift (ppm): 8.75, 8.75, 8.64, 8.64, 8.28, 8.27, 8.25, 8.24, 8.23, 8.23, 7.95, 7.95, 7.95, 7.95, 7.65, 7.63, 6.17, 6.17, 6.16, 6.16, 3.91, 3.21, 3.20, 3.20, 3.19, 3.18, 3.17, 3.17, 3.16, 3.07, 3.06, 3.06, 3.05, 3.04, 3.03, 3.03, 3.02, 2.72, 2.72, 2.71, 2.71, 2.70, 2.70, 2.70, 2.69, 2.16, 2.15, 2.15, 2.14, 2.14, 2.13, 2.13, 2.13.

Integration values: 0.86, 0.95, 0.85, 0.91, 1.00, 1.00, 1.05, 2.89, 1.08, 1.07, 1.07, 1.05.

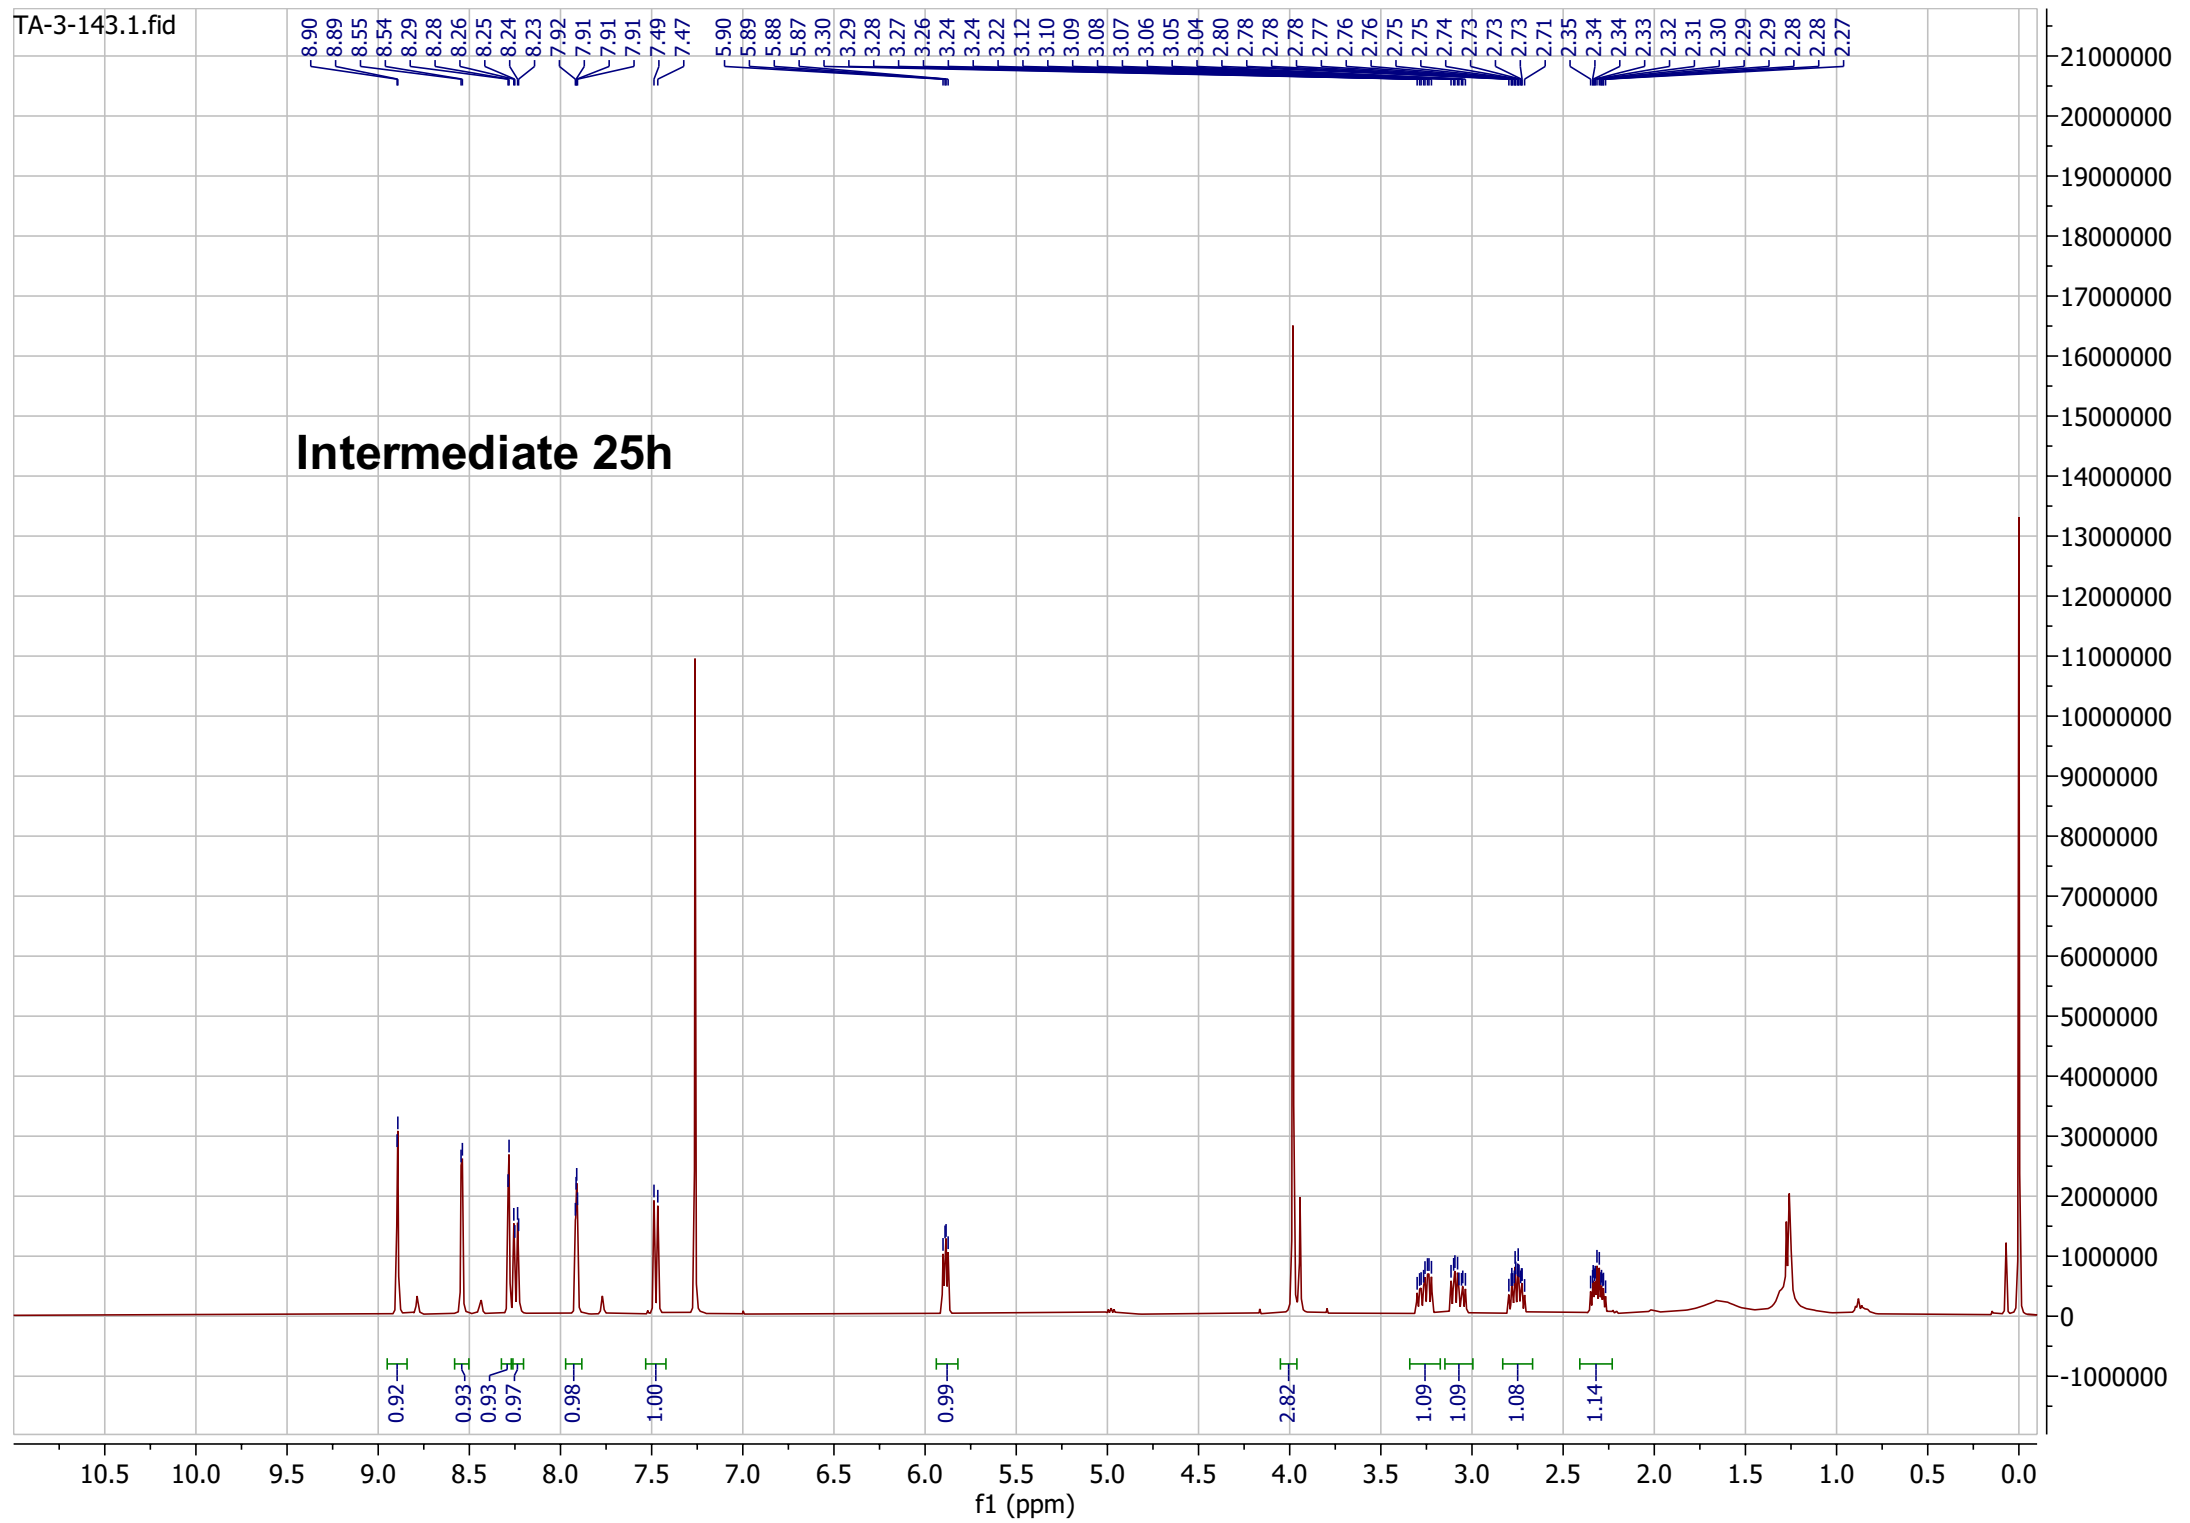

TA-2-026\_PROTON\_01  
TA-2-026

# Intermediate 26a

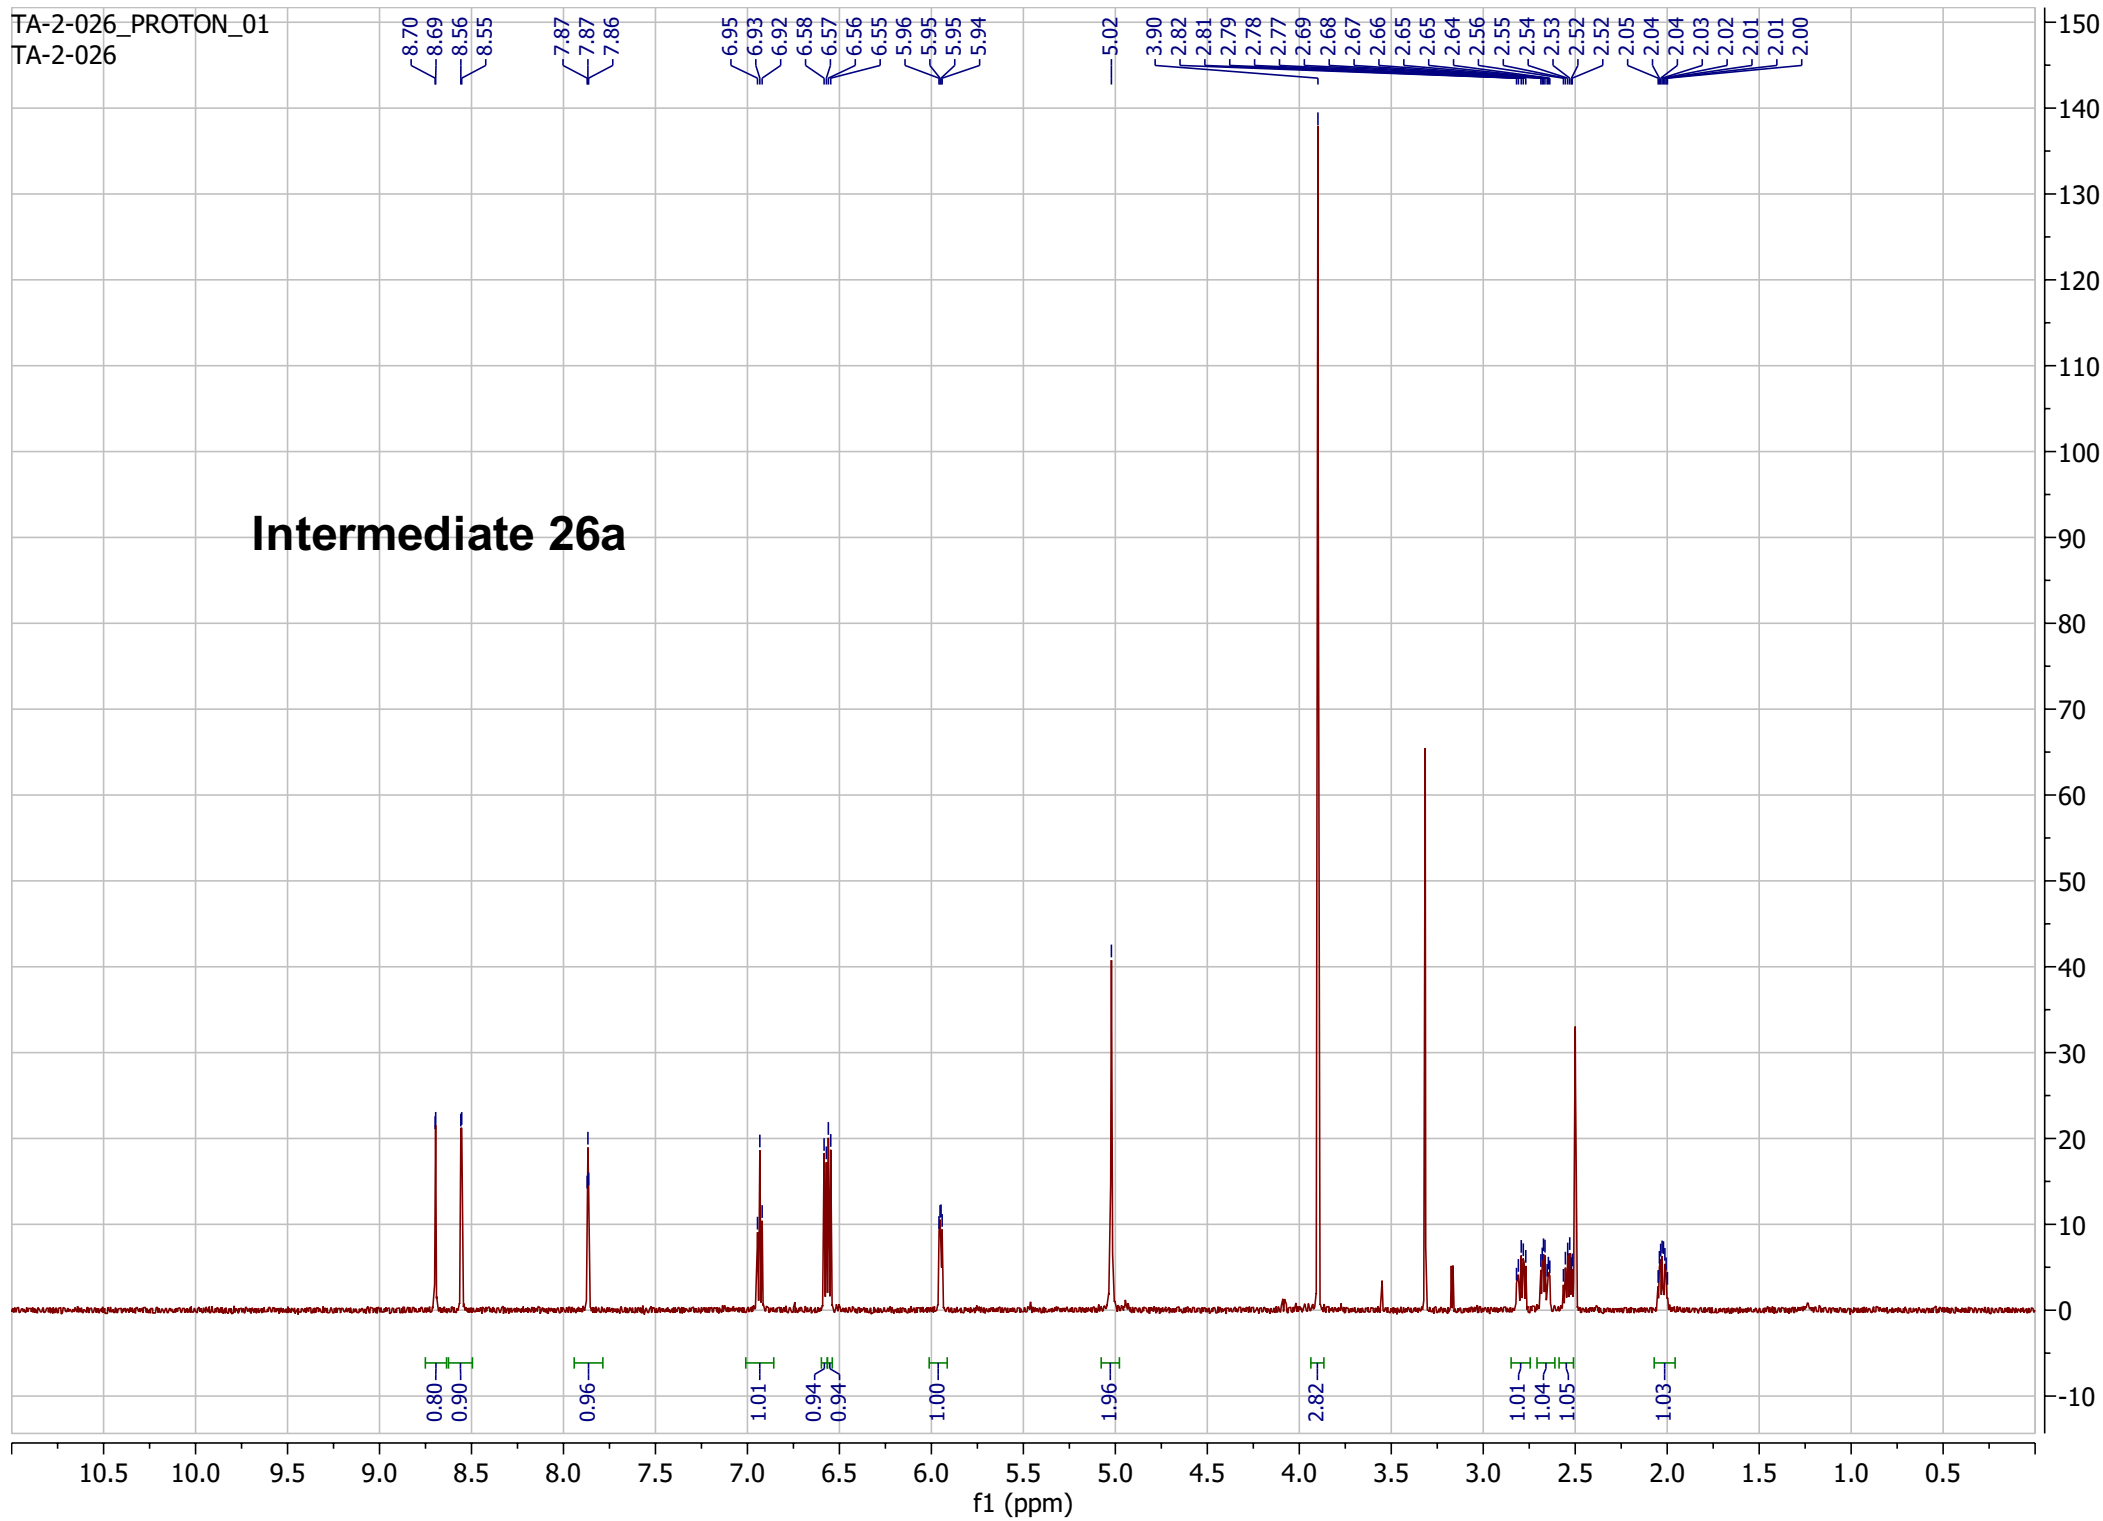

# Intermediate 26b

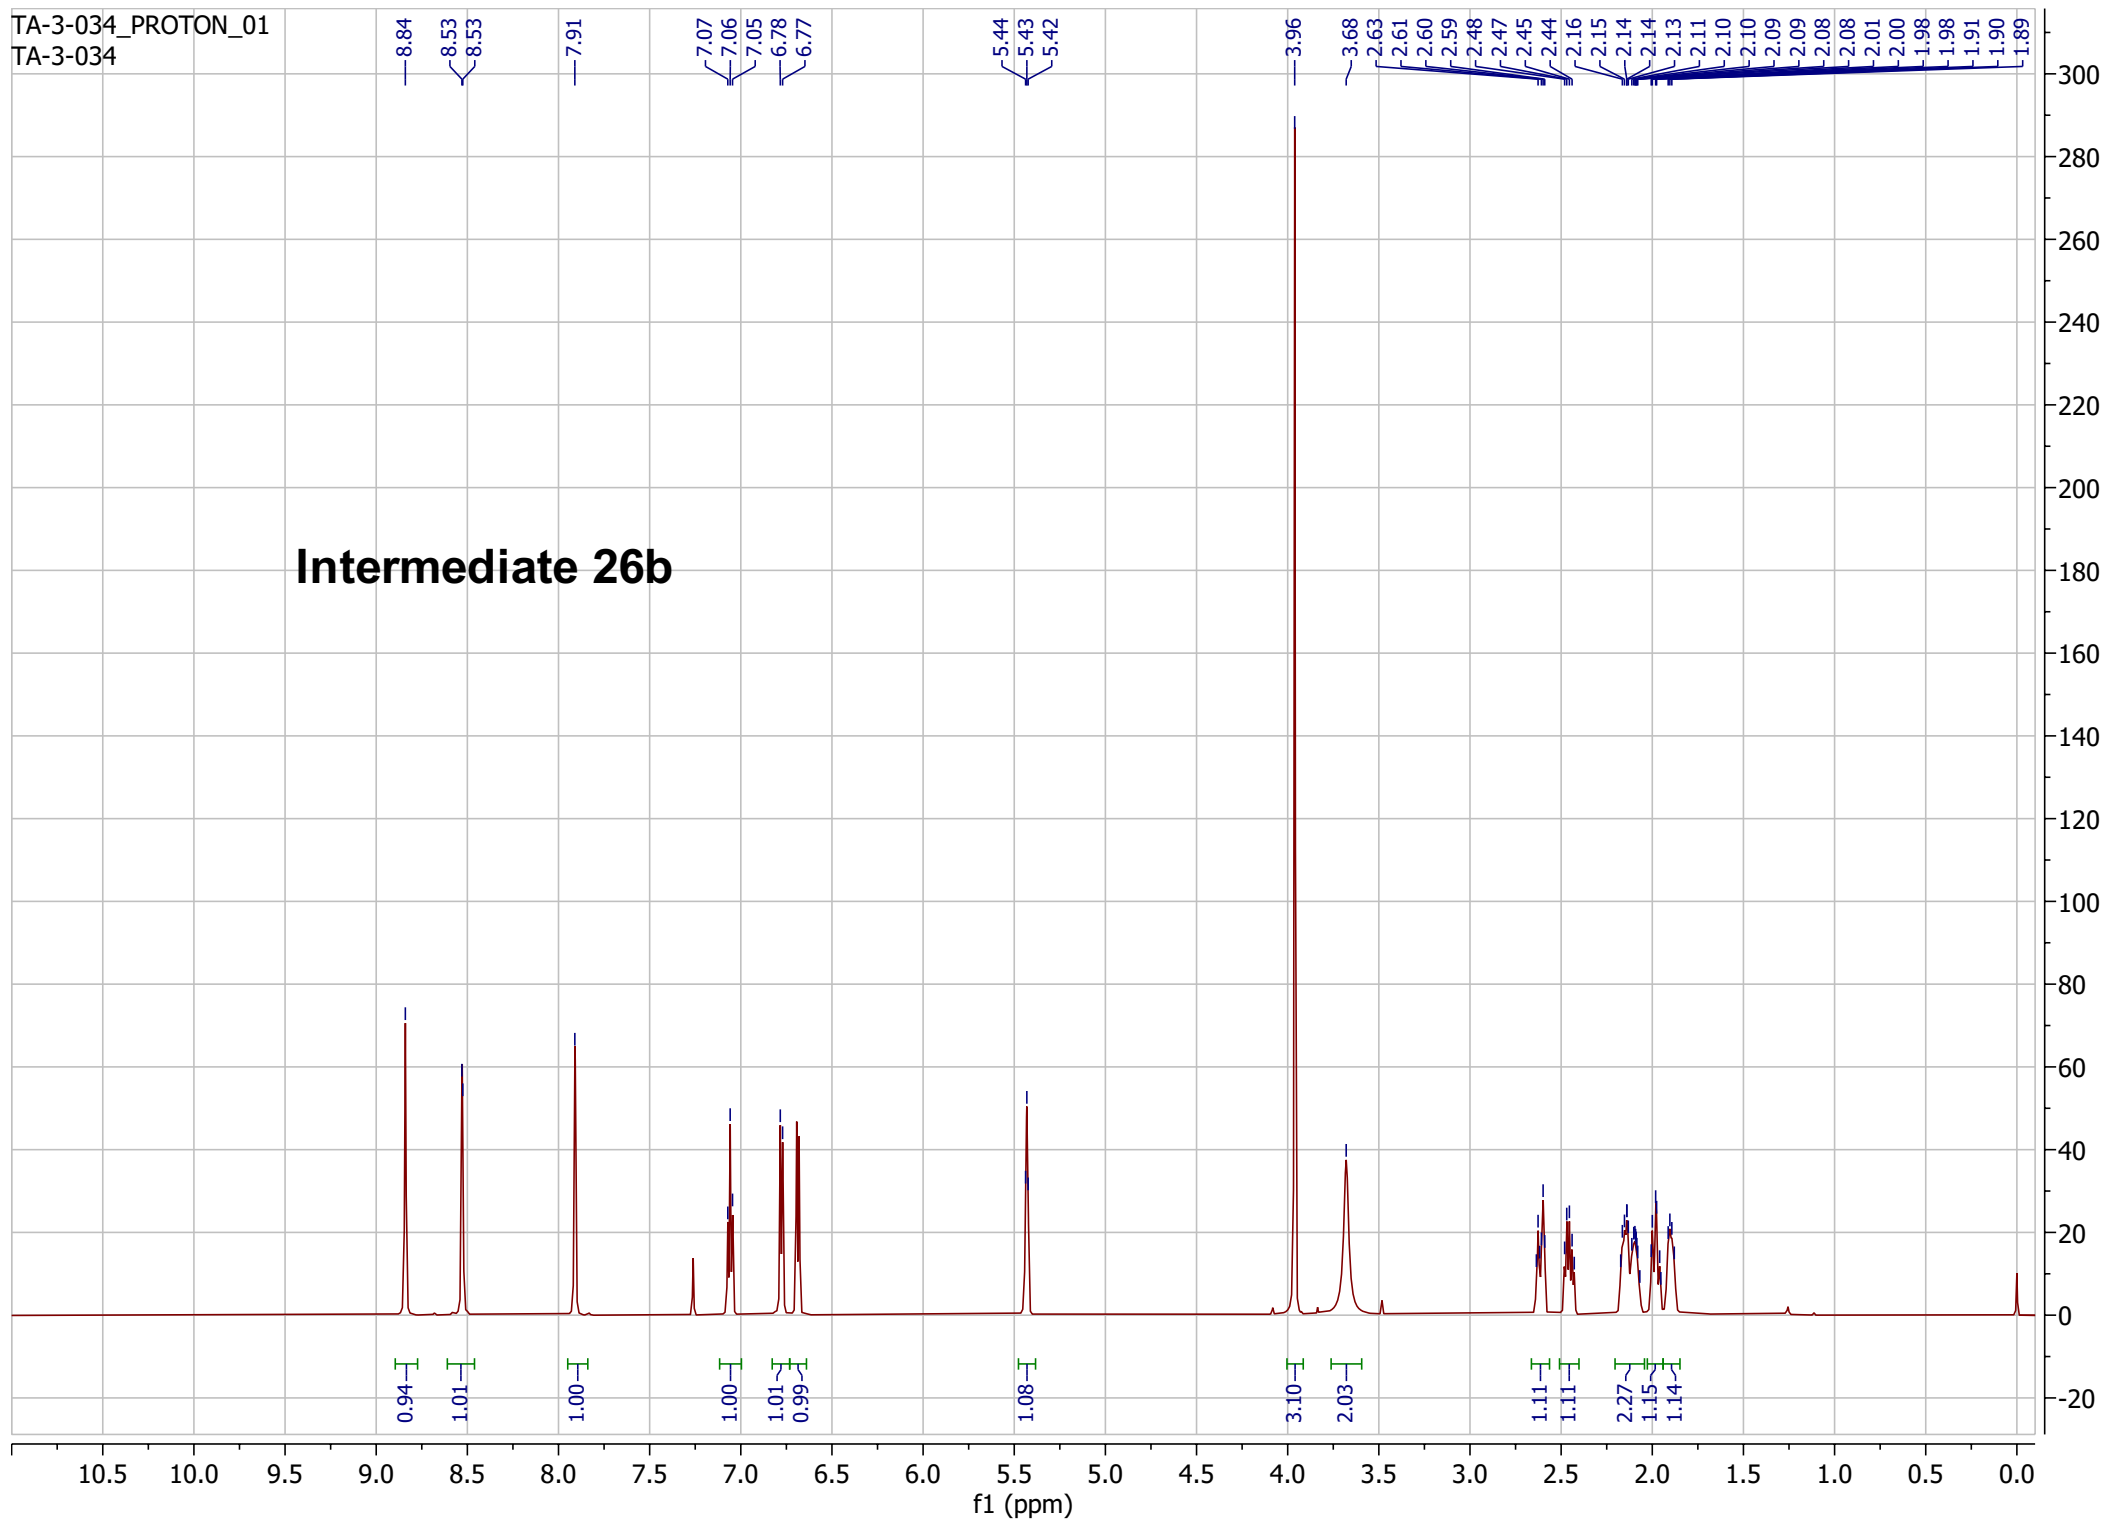

TA-3-138\_PROTON\_01  
TA-3-138

# Intermediate 26c

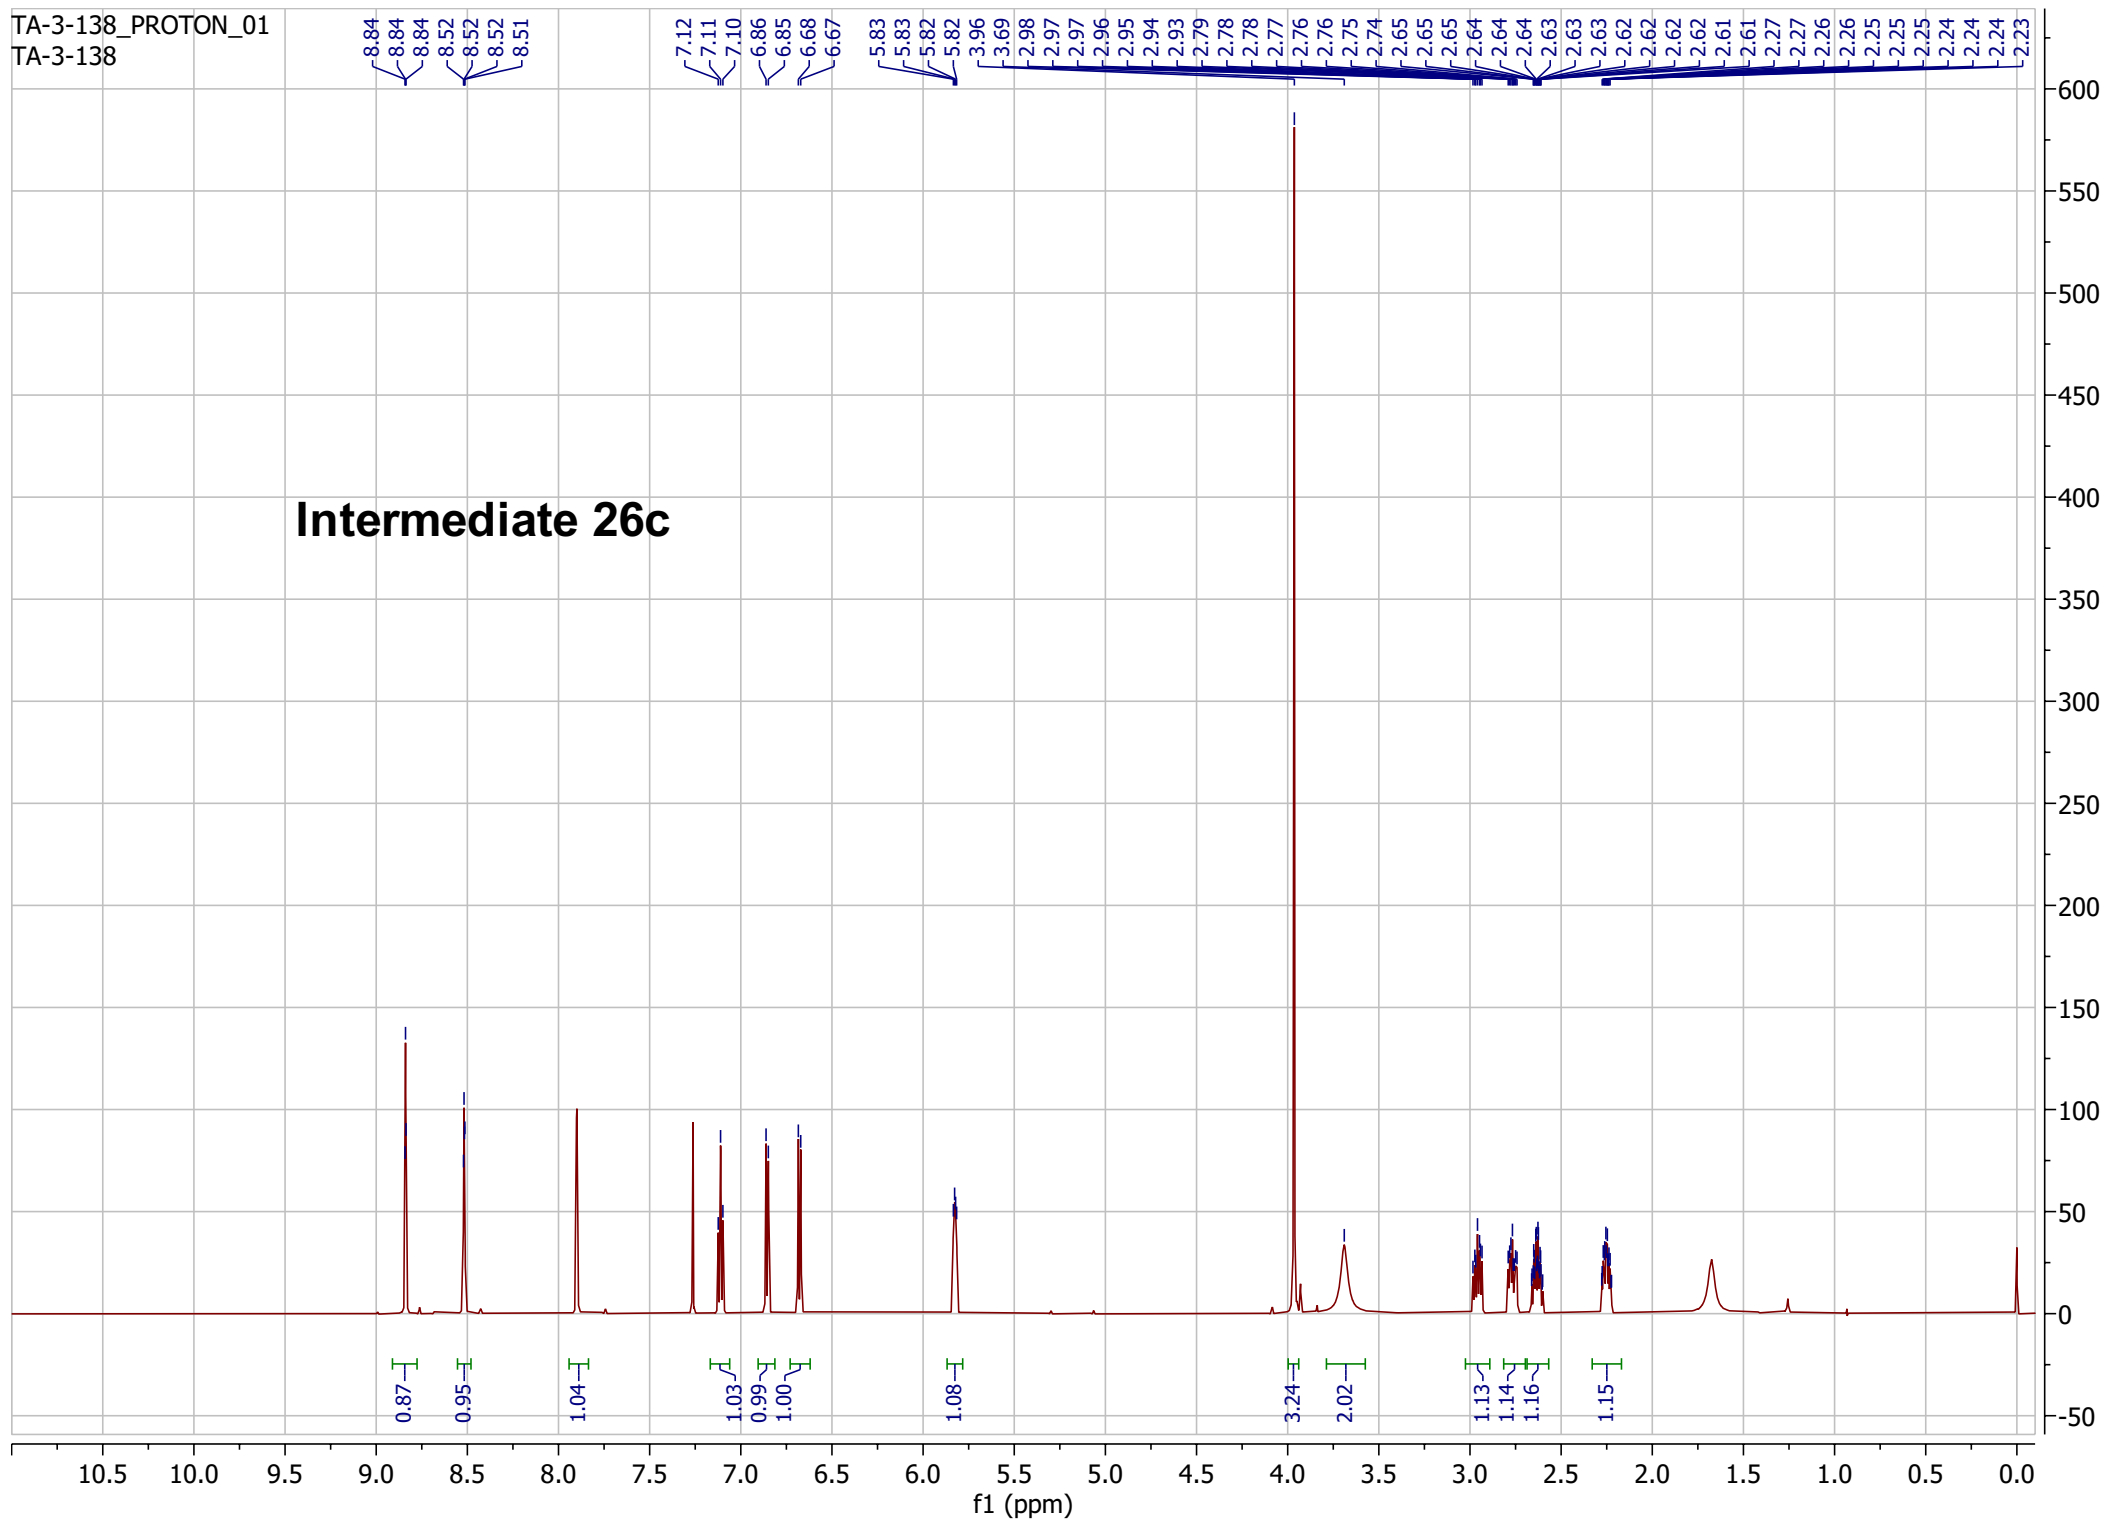



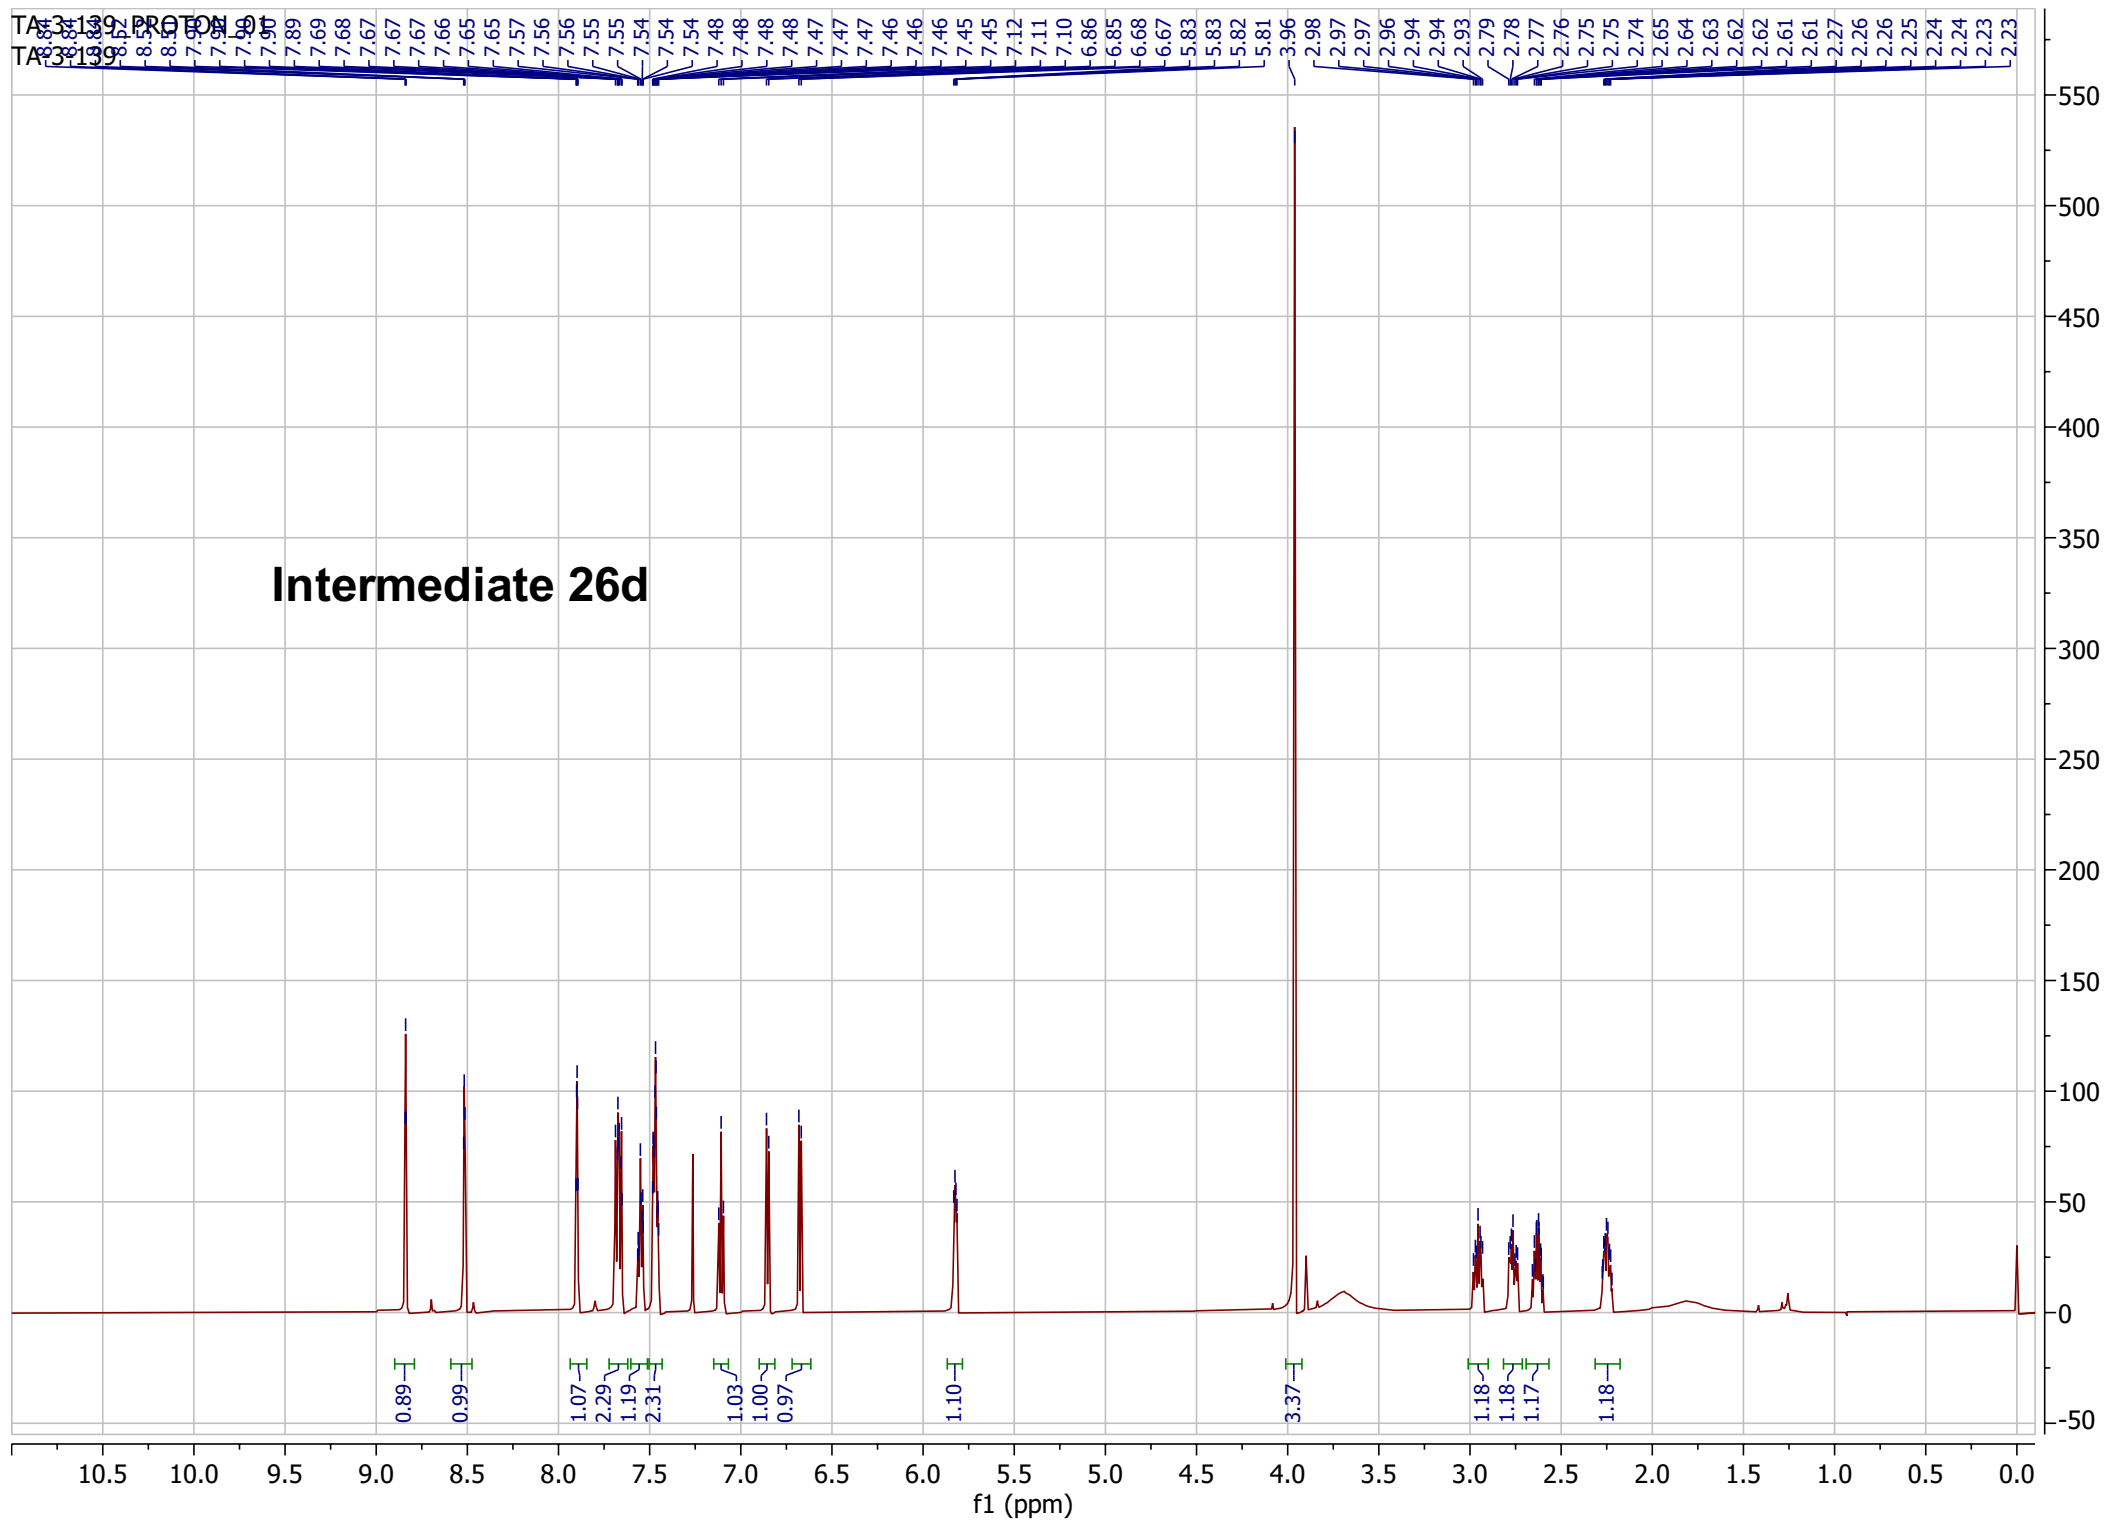

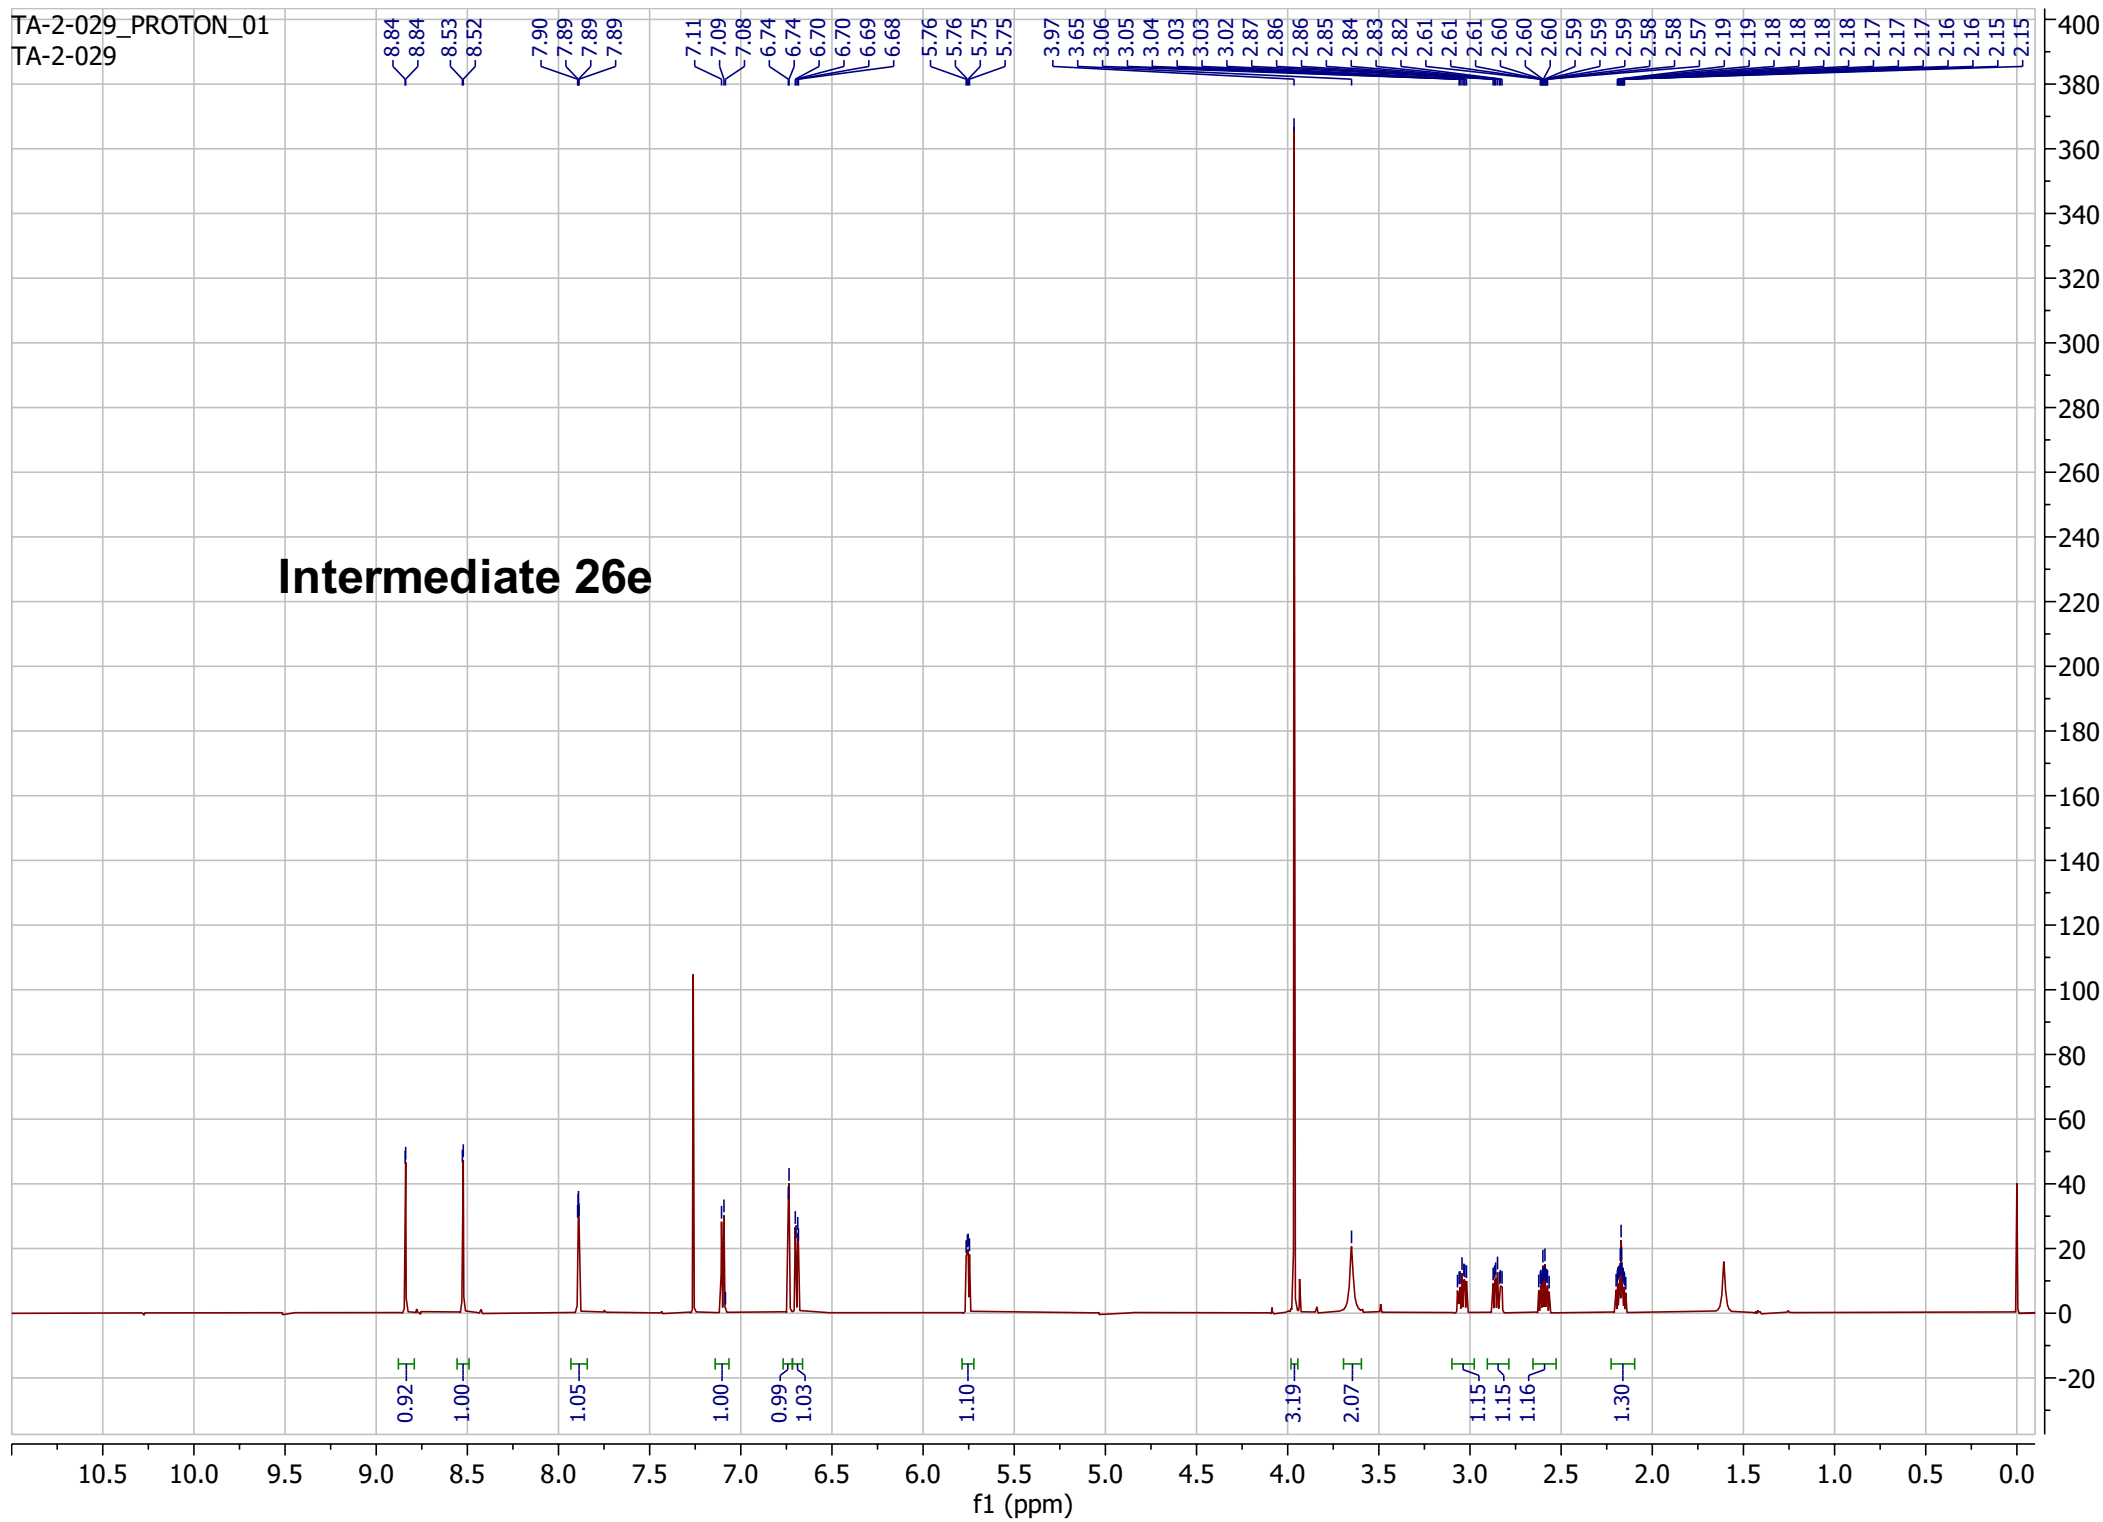

TA-3-033\_PROTON\_01  
TA-3-033

# Intermediate 26f

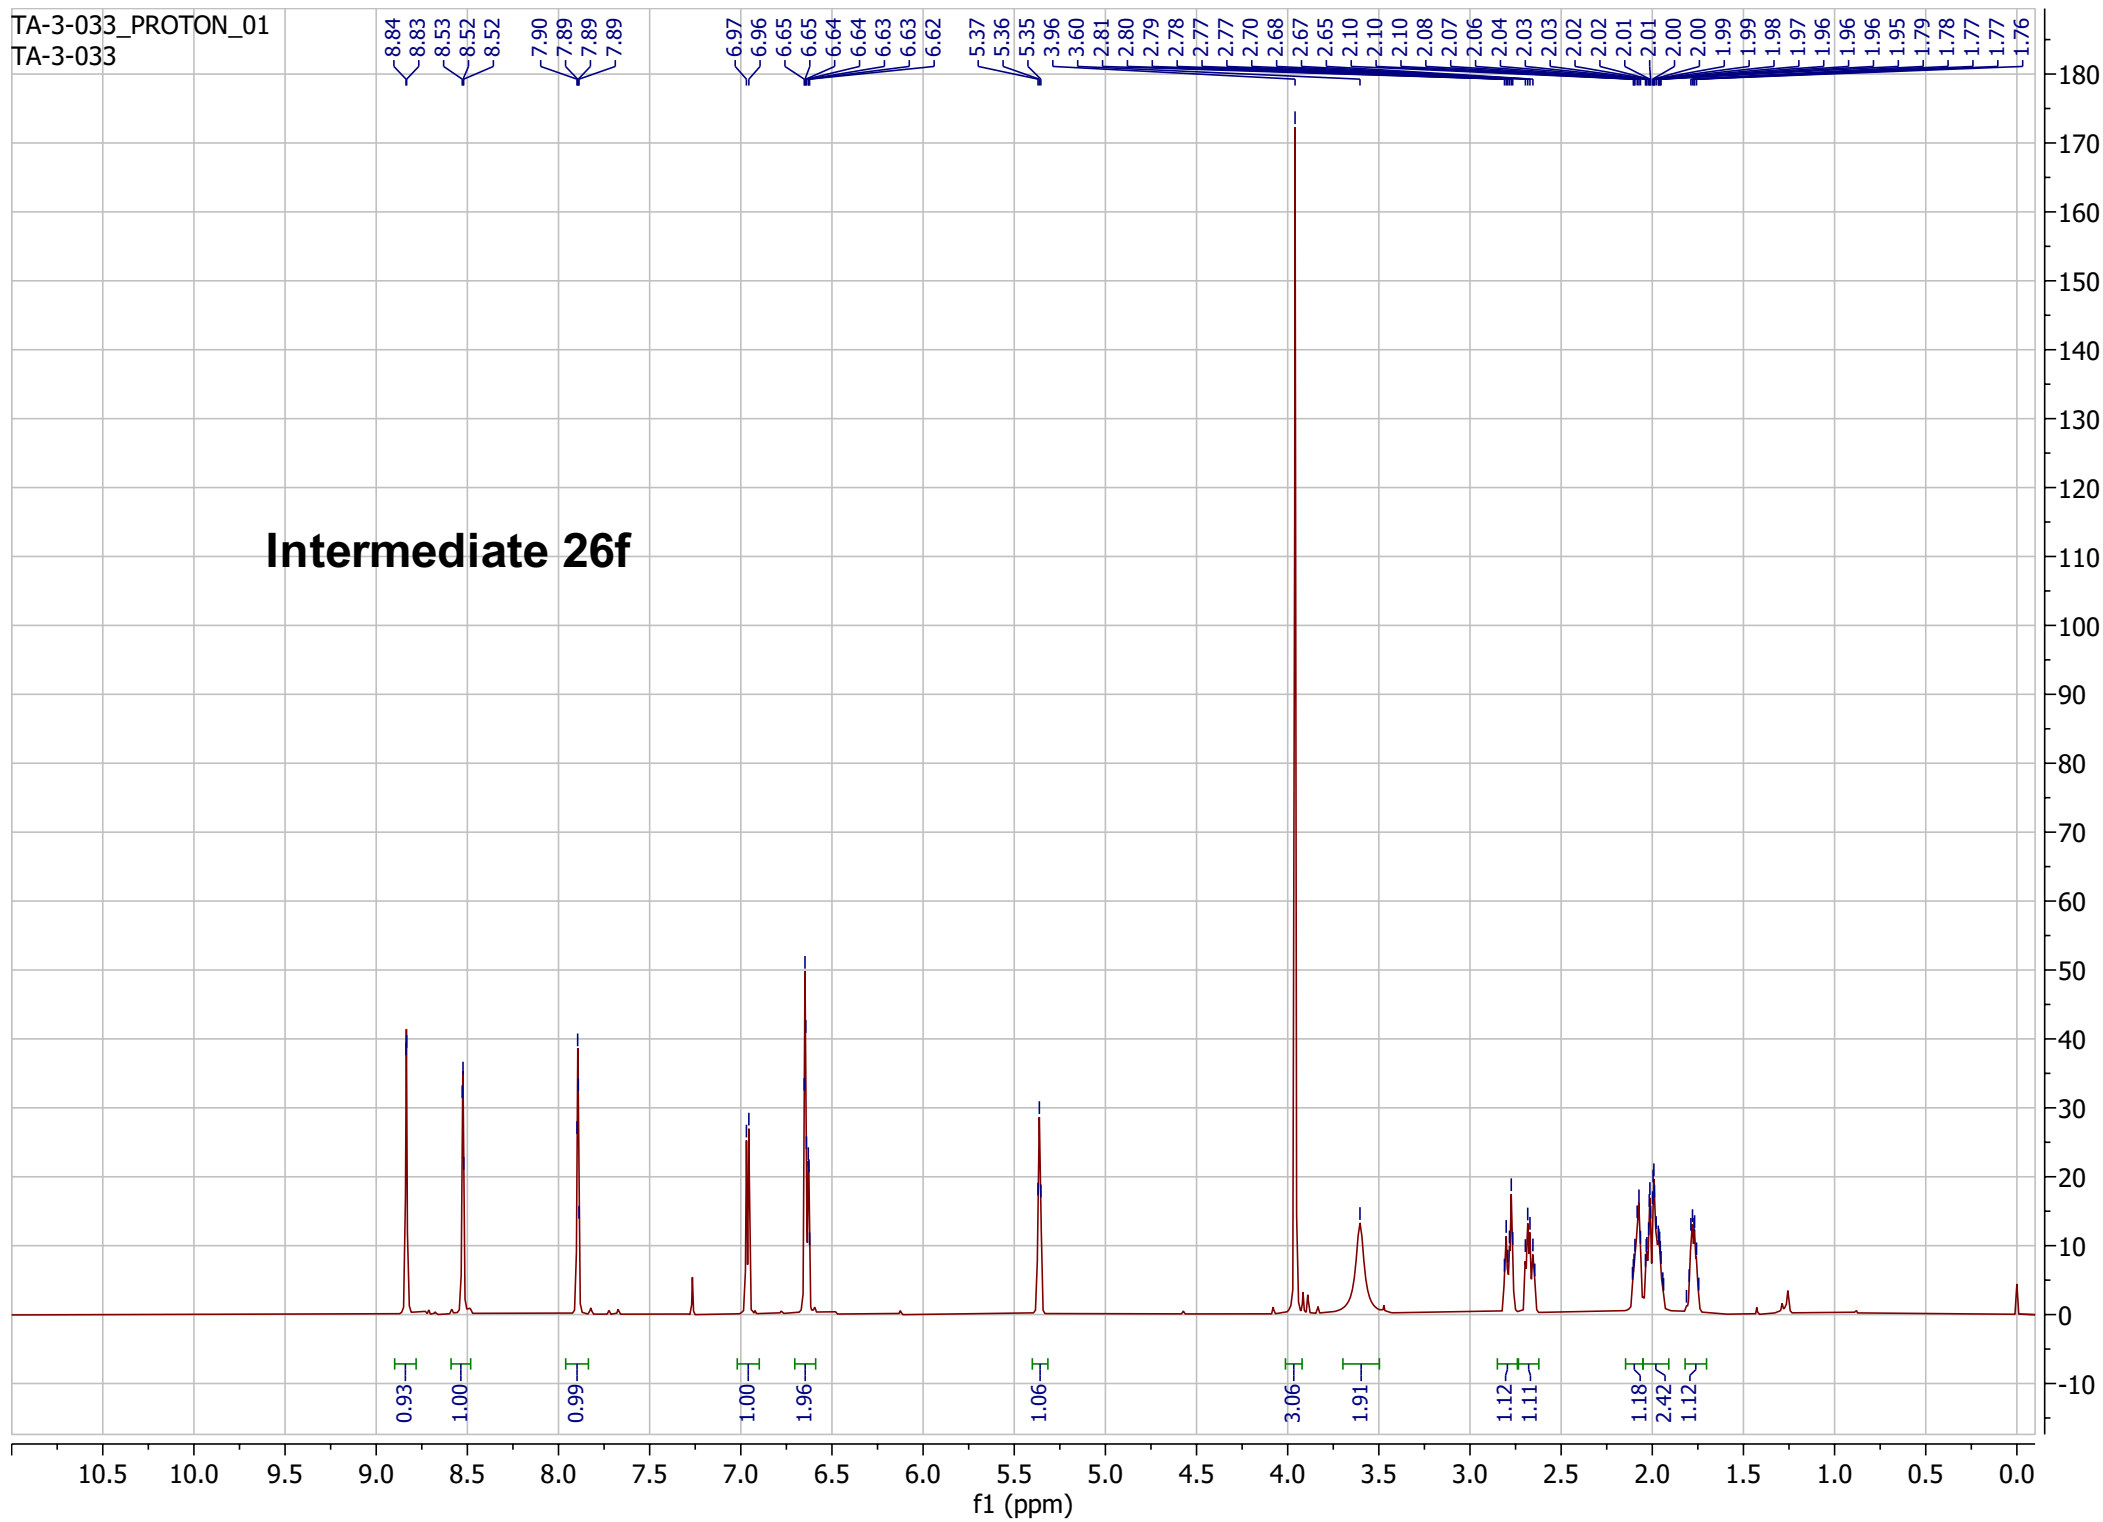

TA-3-155\_PROTON\_01  
TA-3-155

## Intermediate 26g

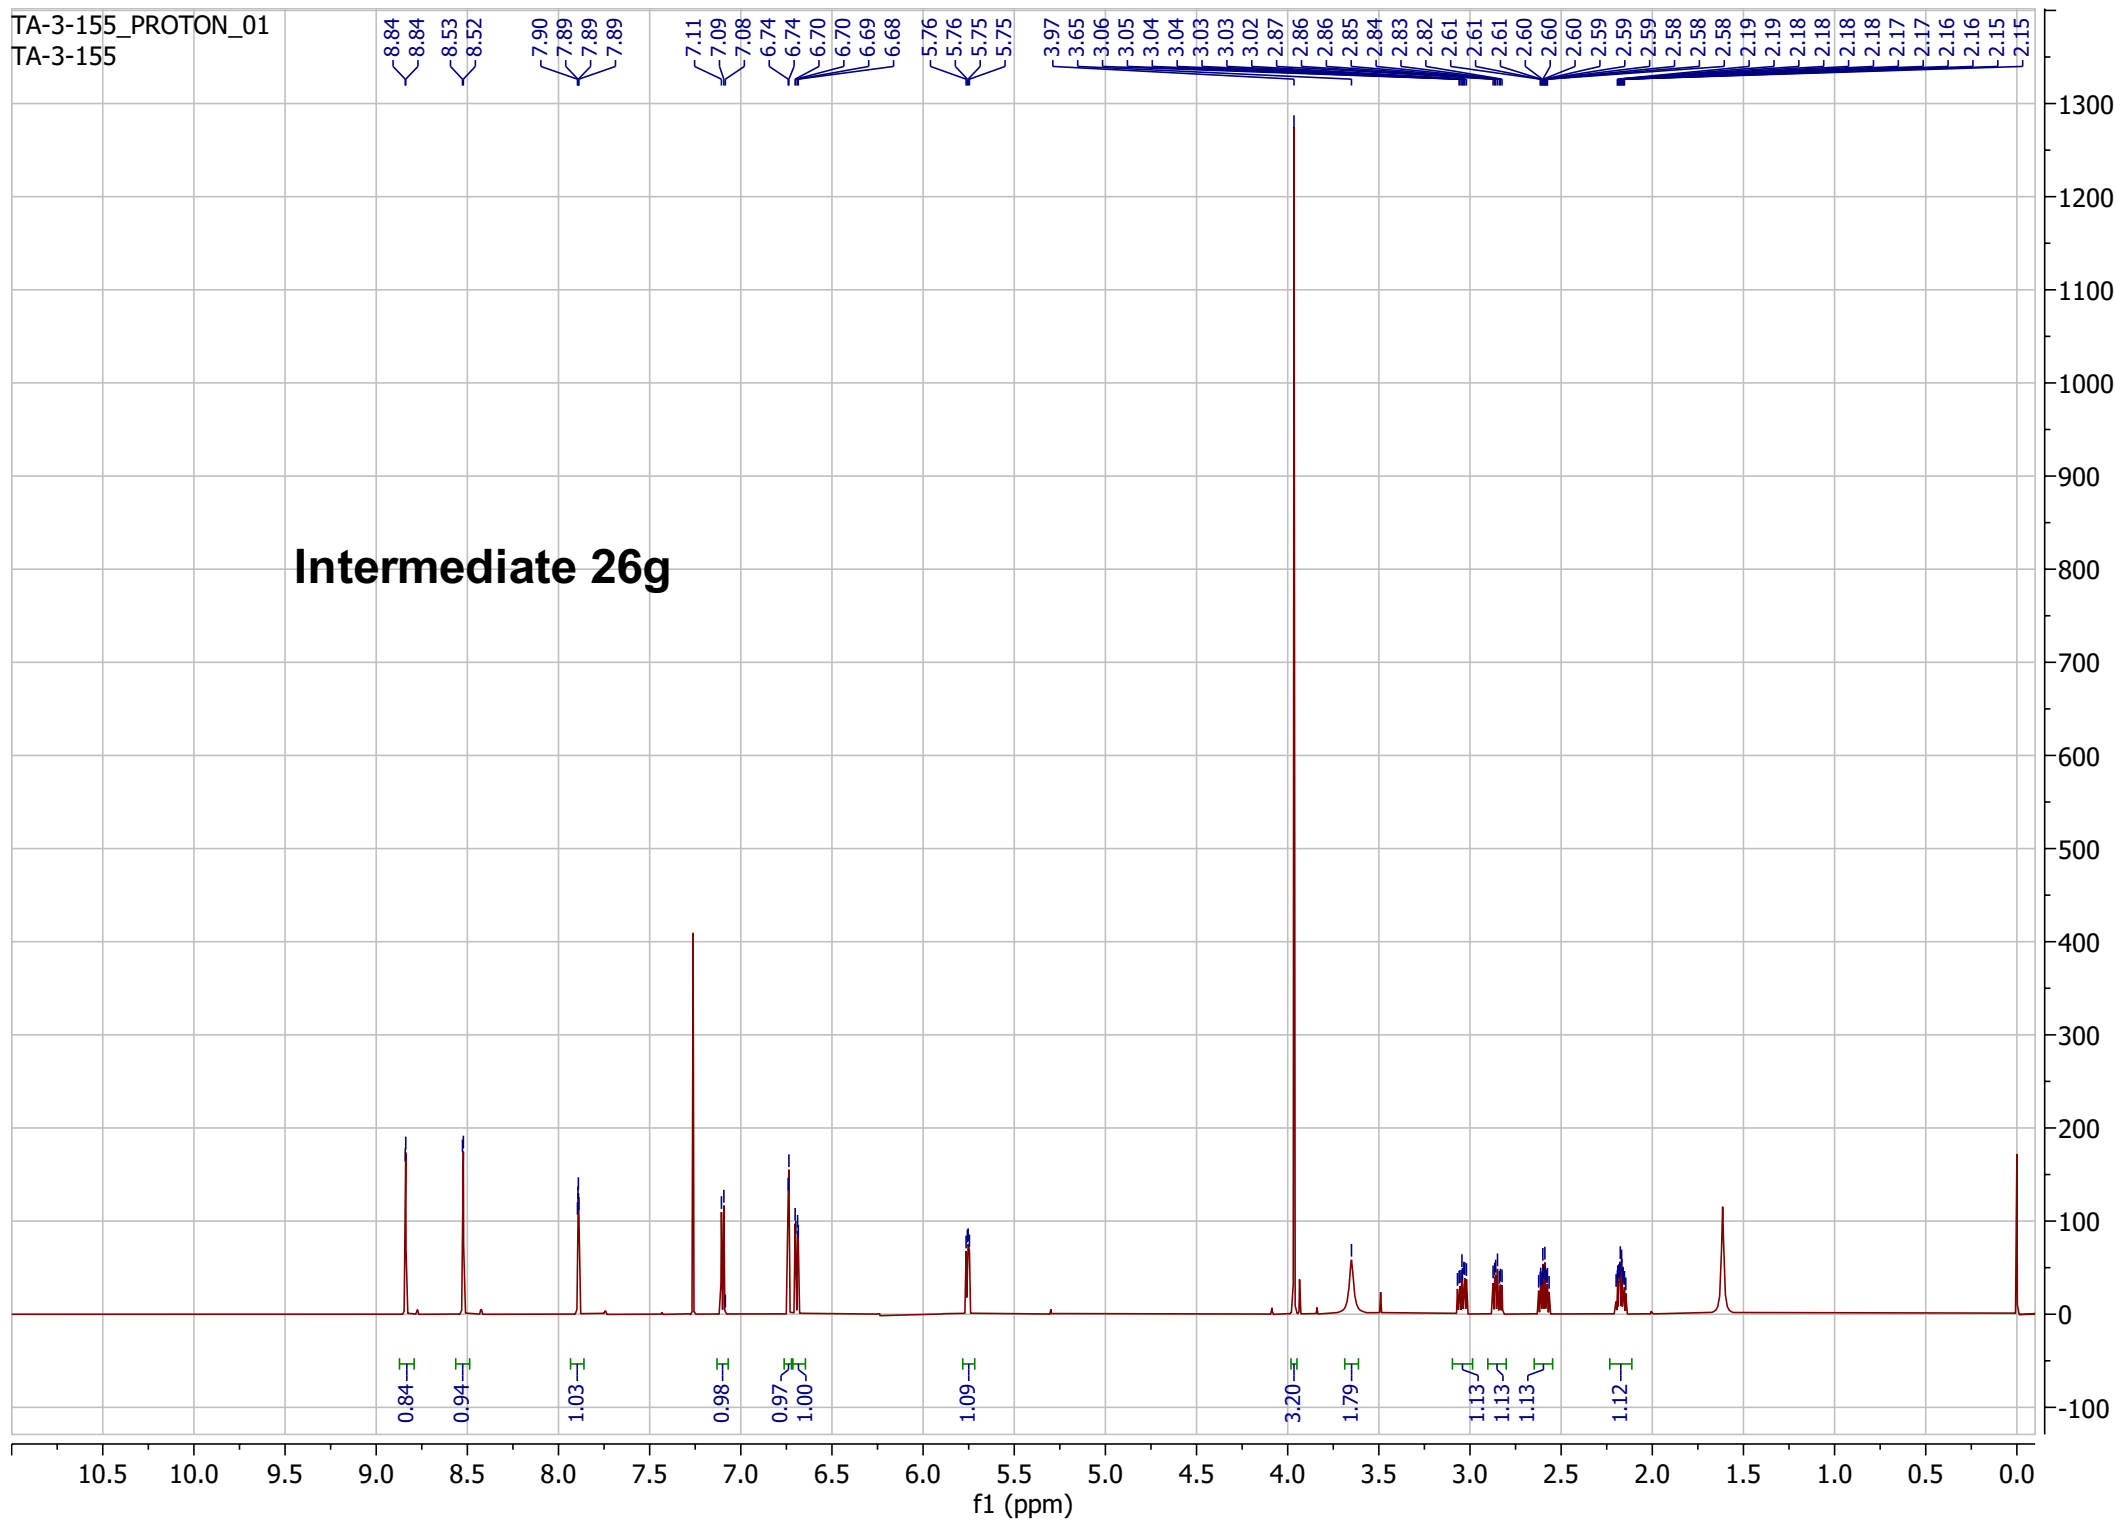

# Intermediate 26h

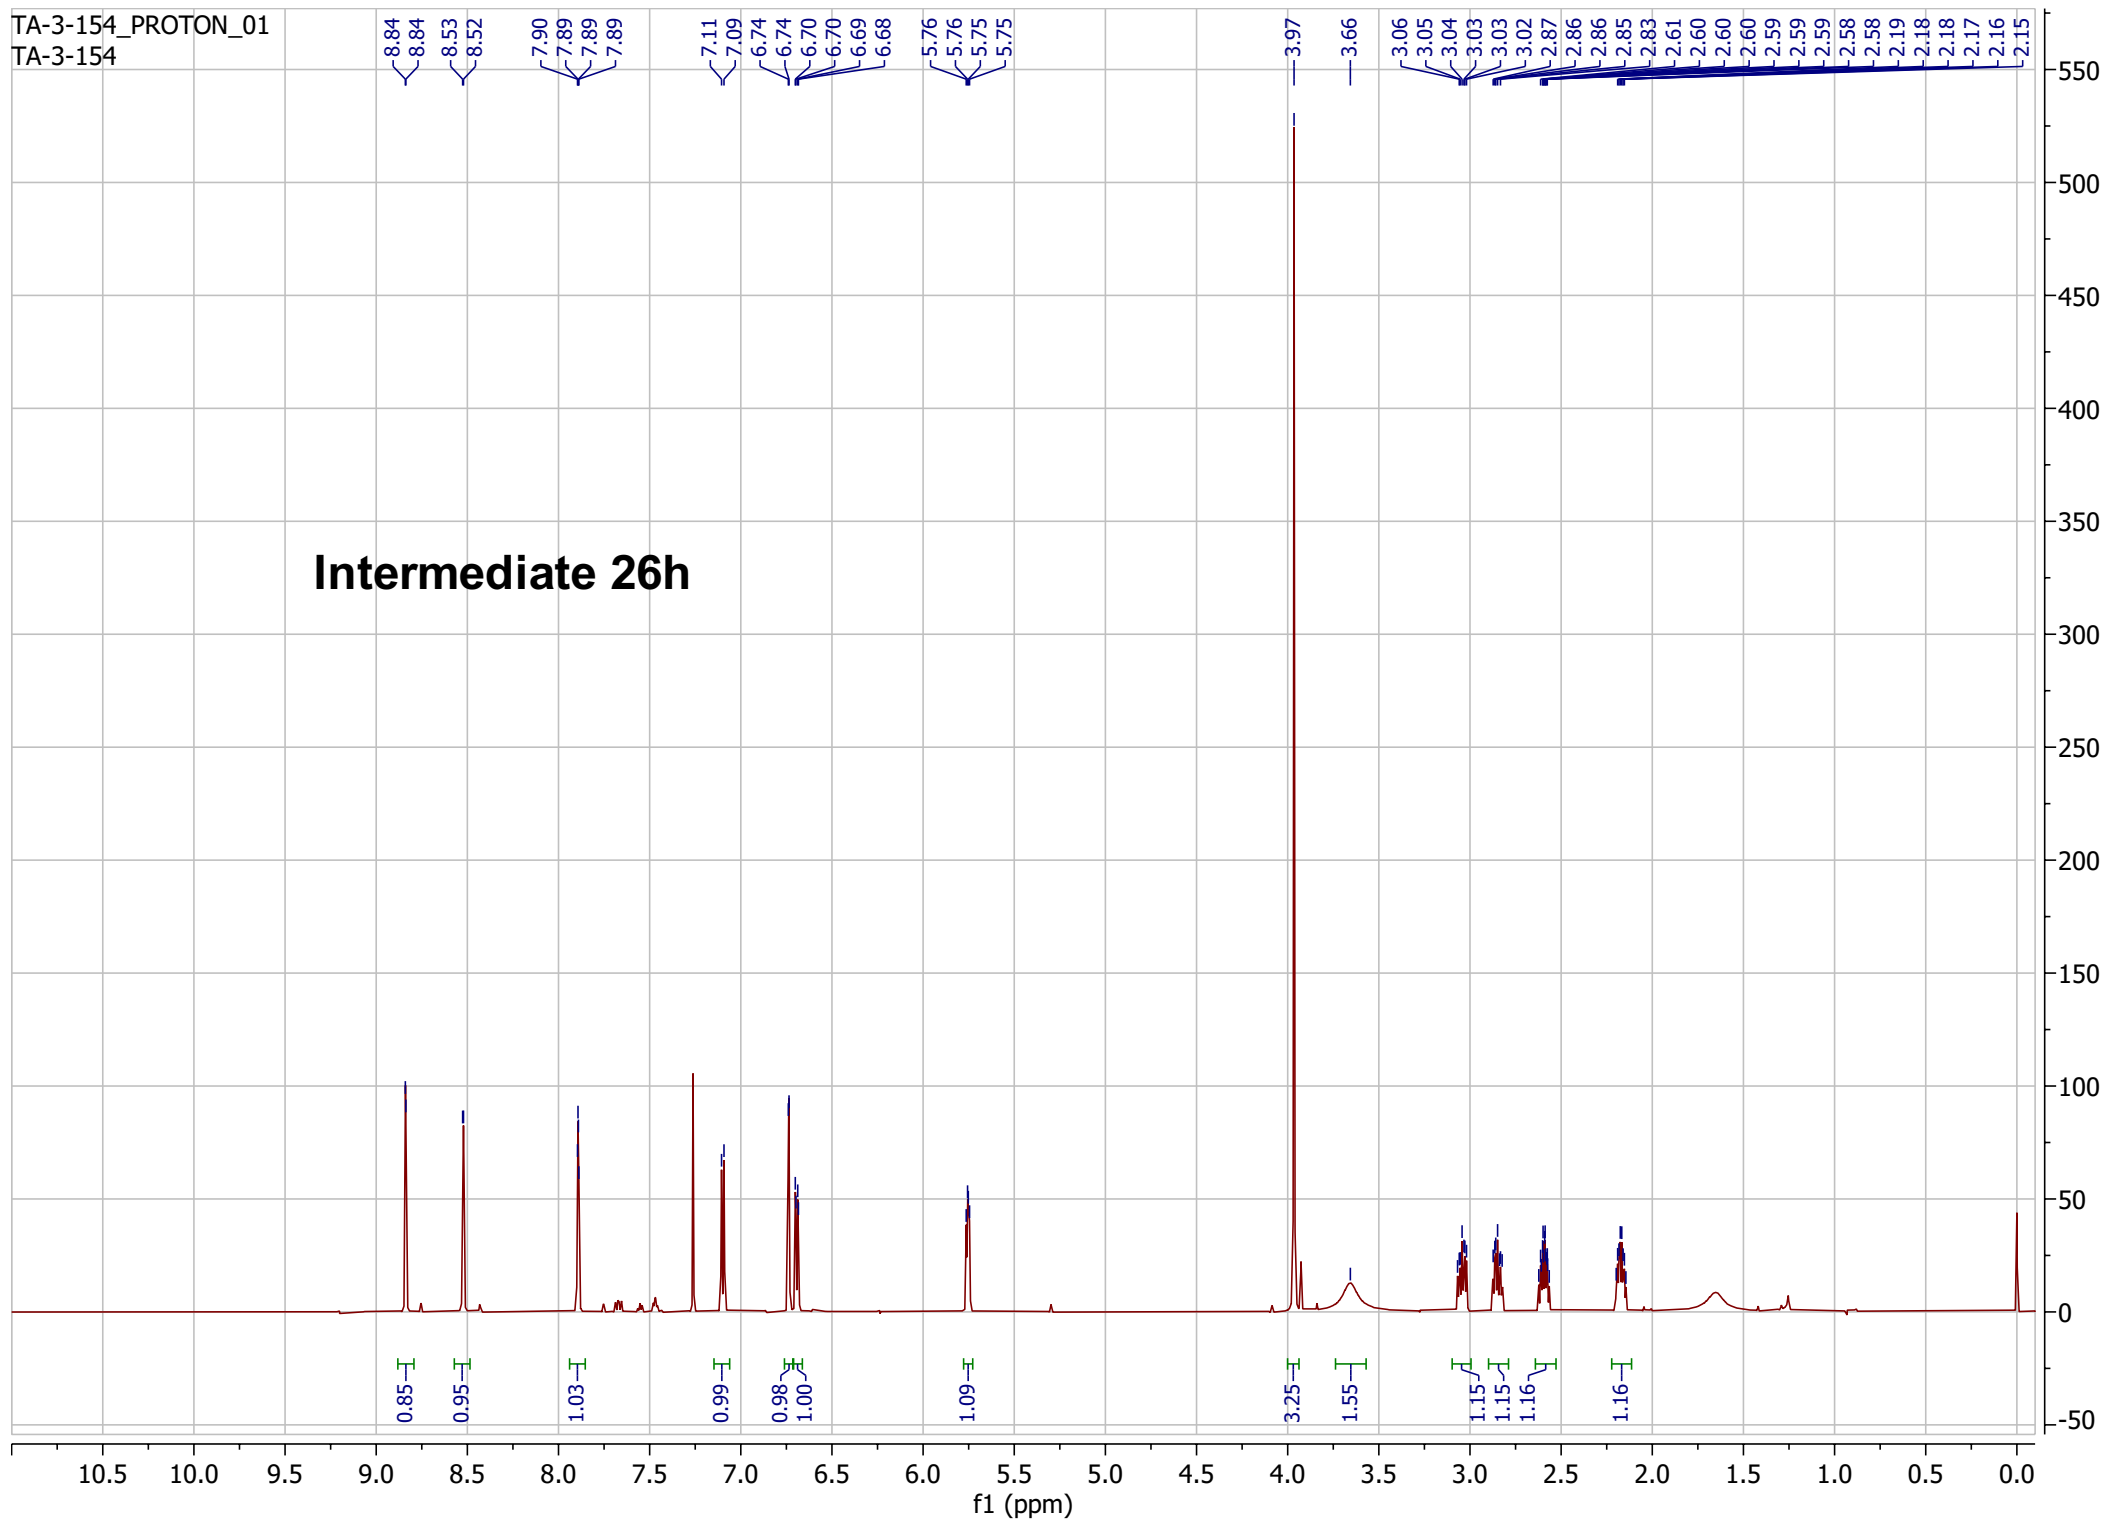

TA-2-030\_PROTON\_01  
TA-2-030

# Intermediate 27a

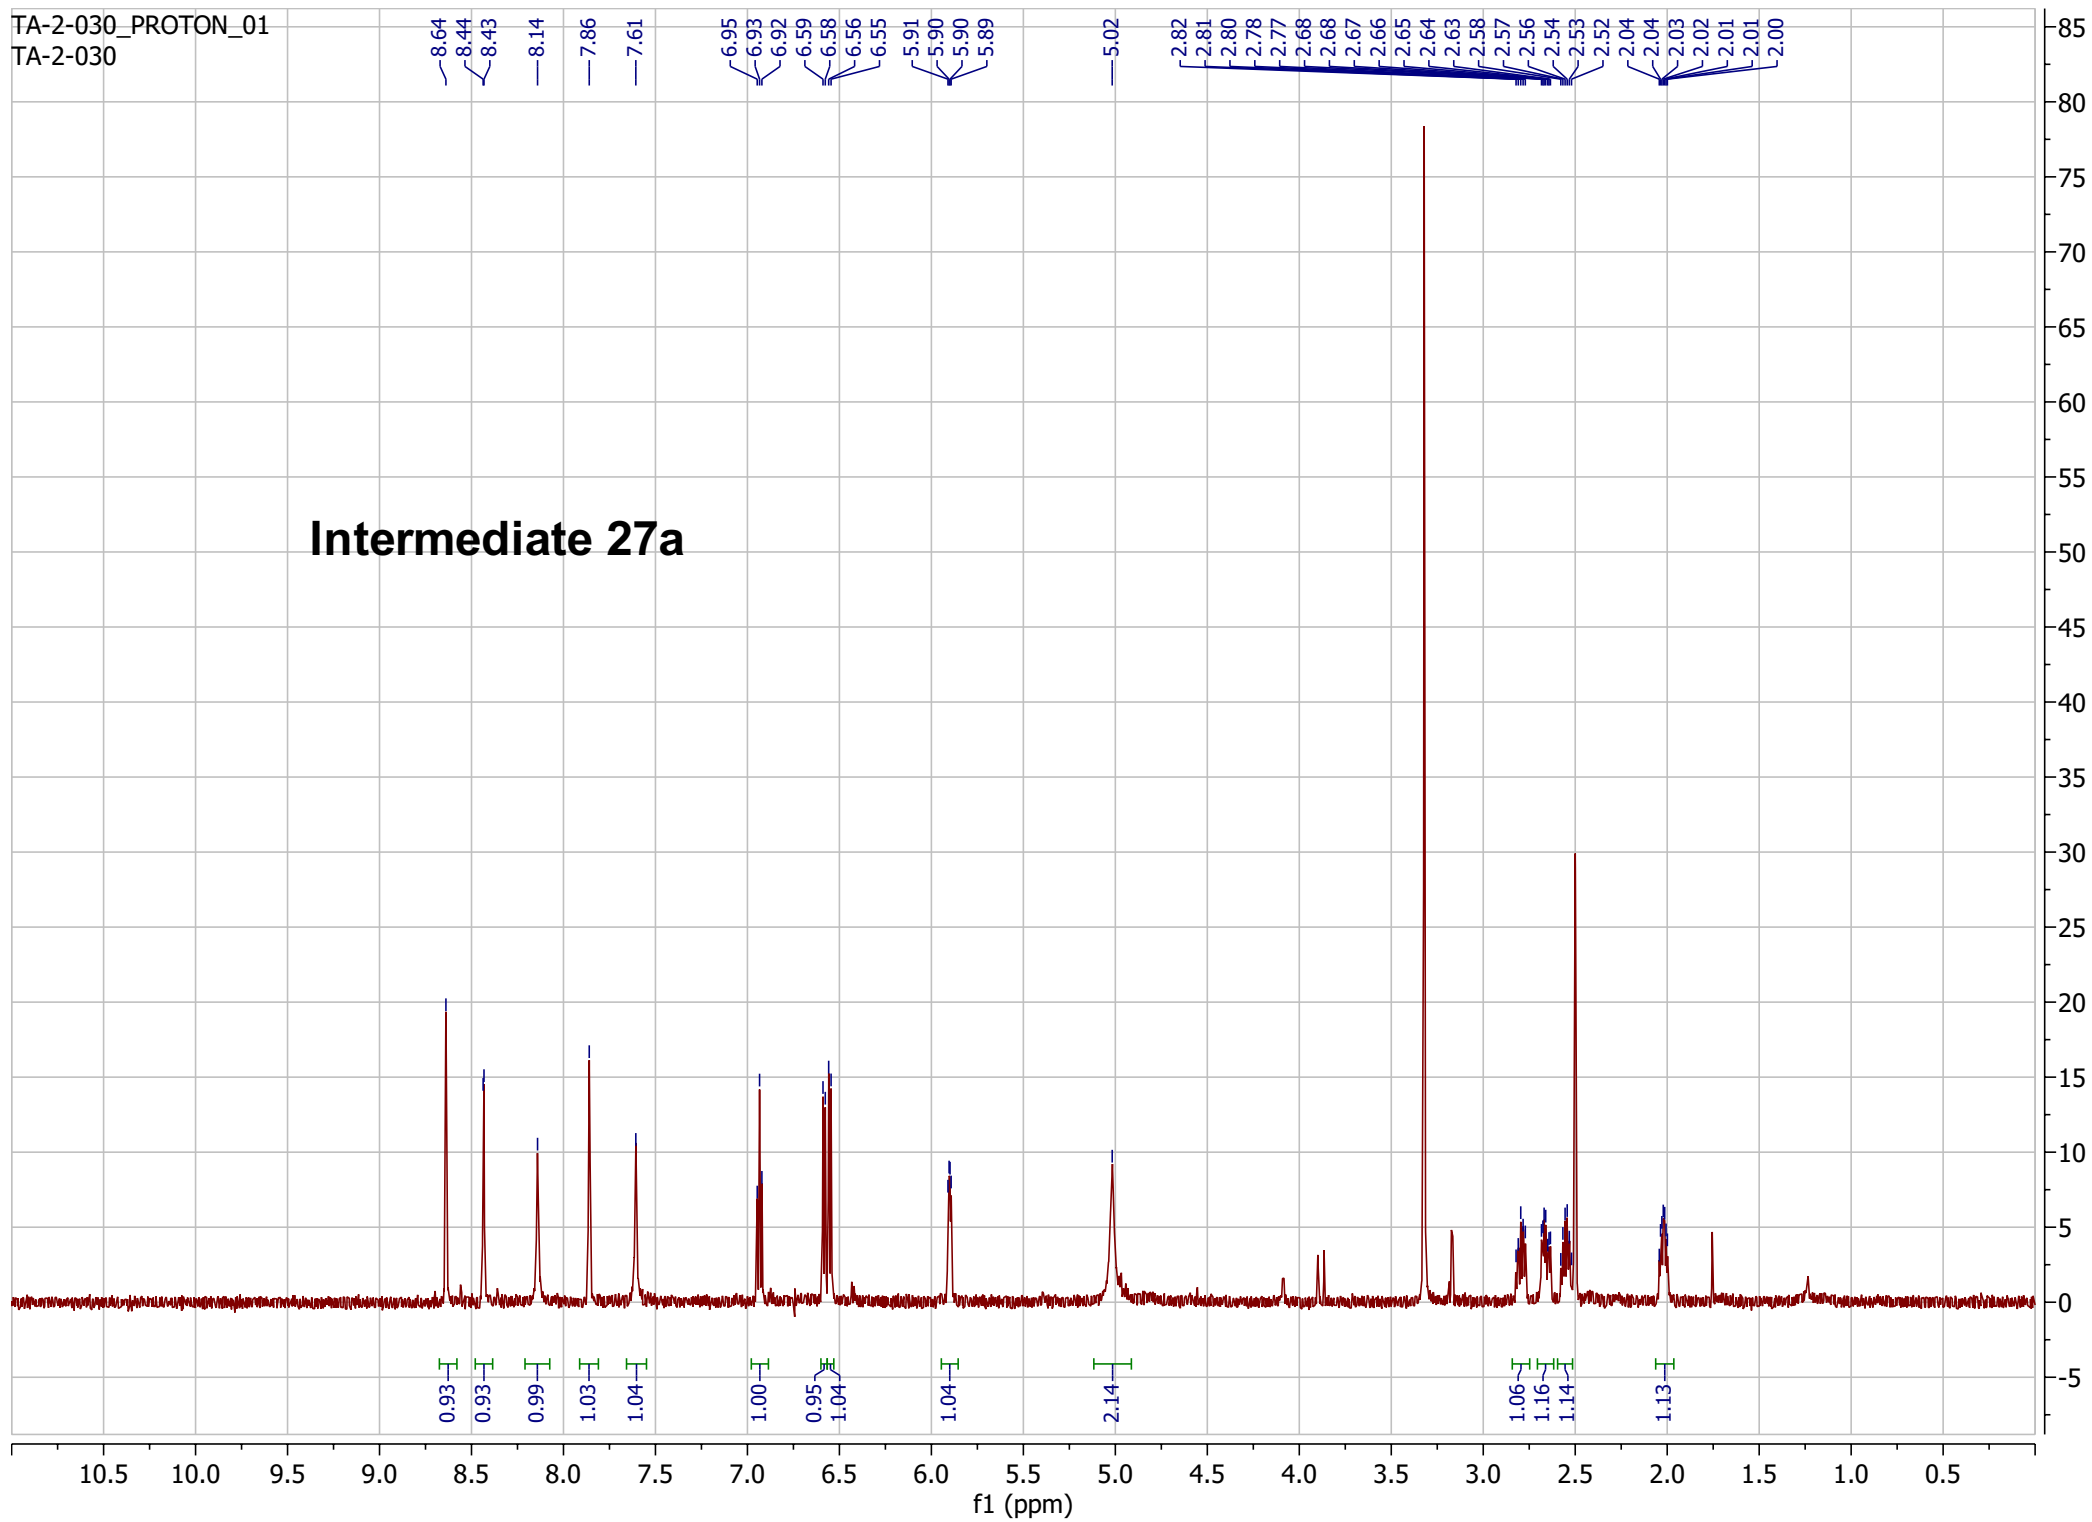

TA-3-036\_PROTON\_01  
TA-3-036

# Intermediate 27b

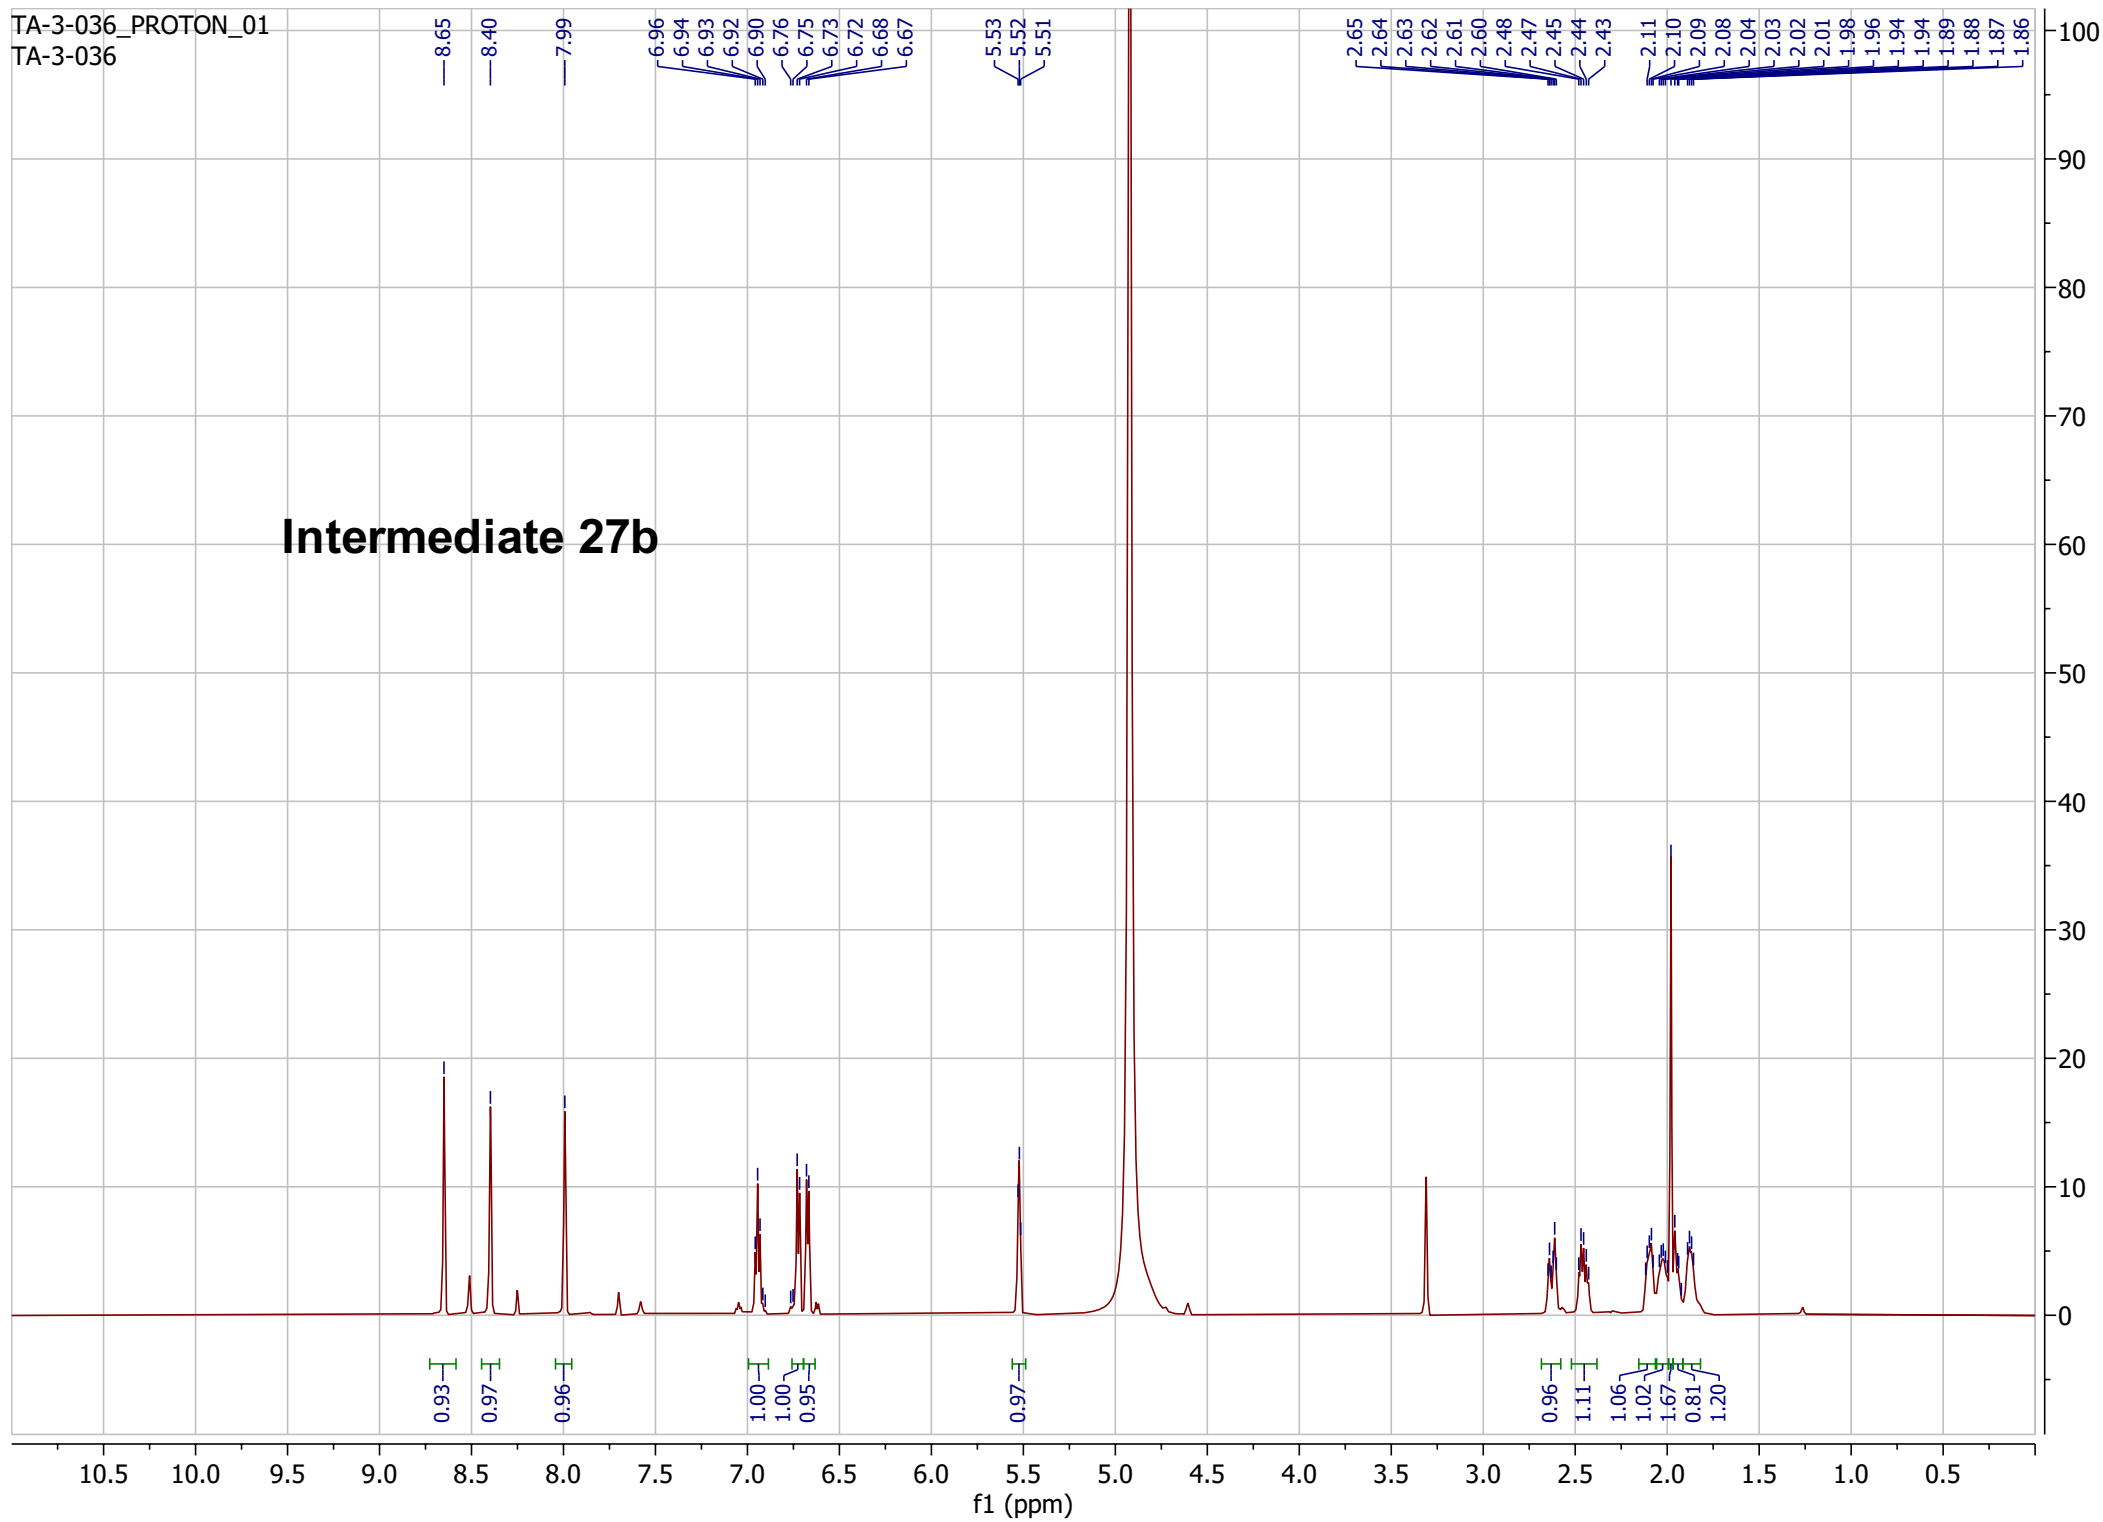

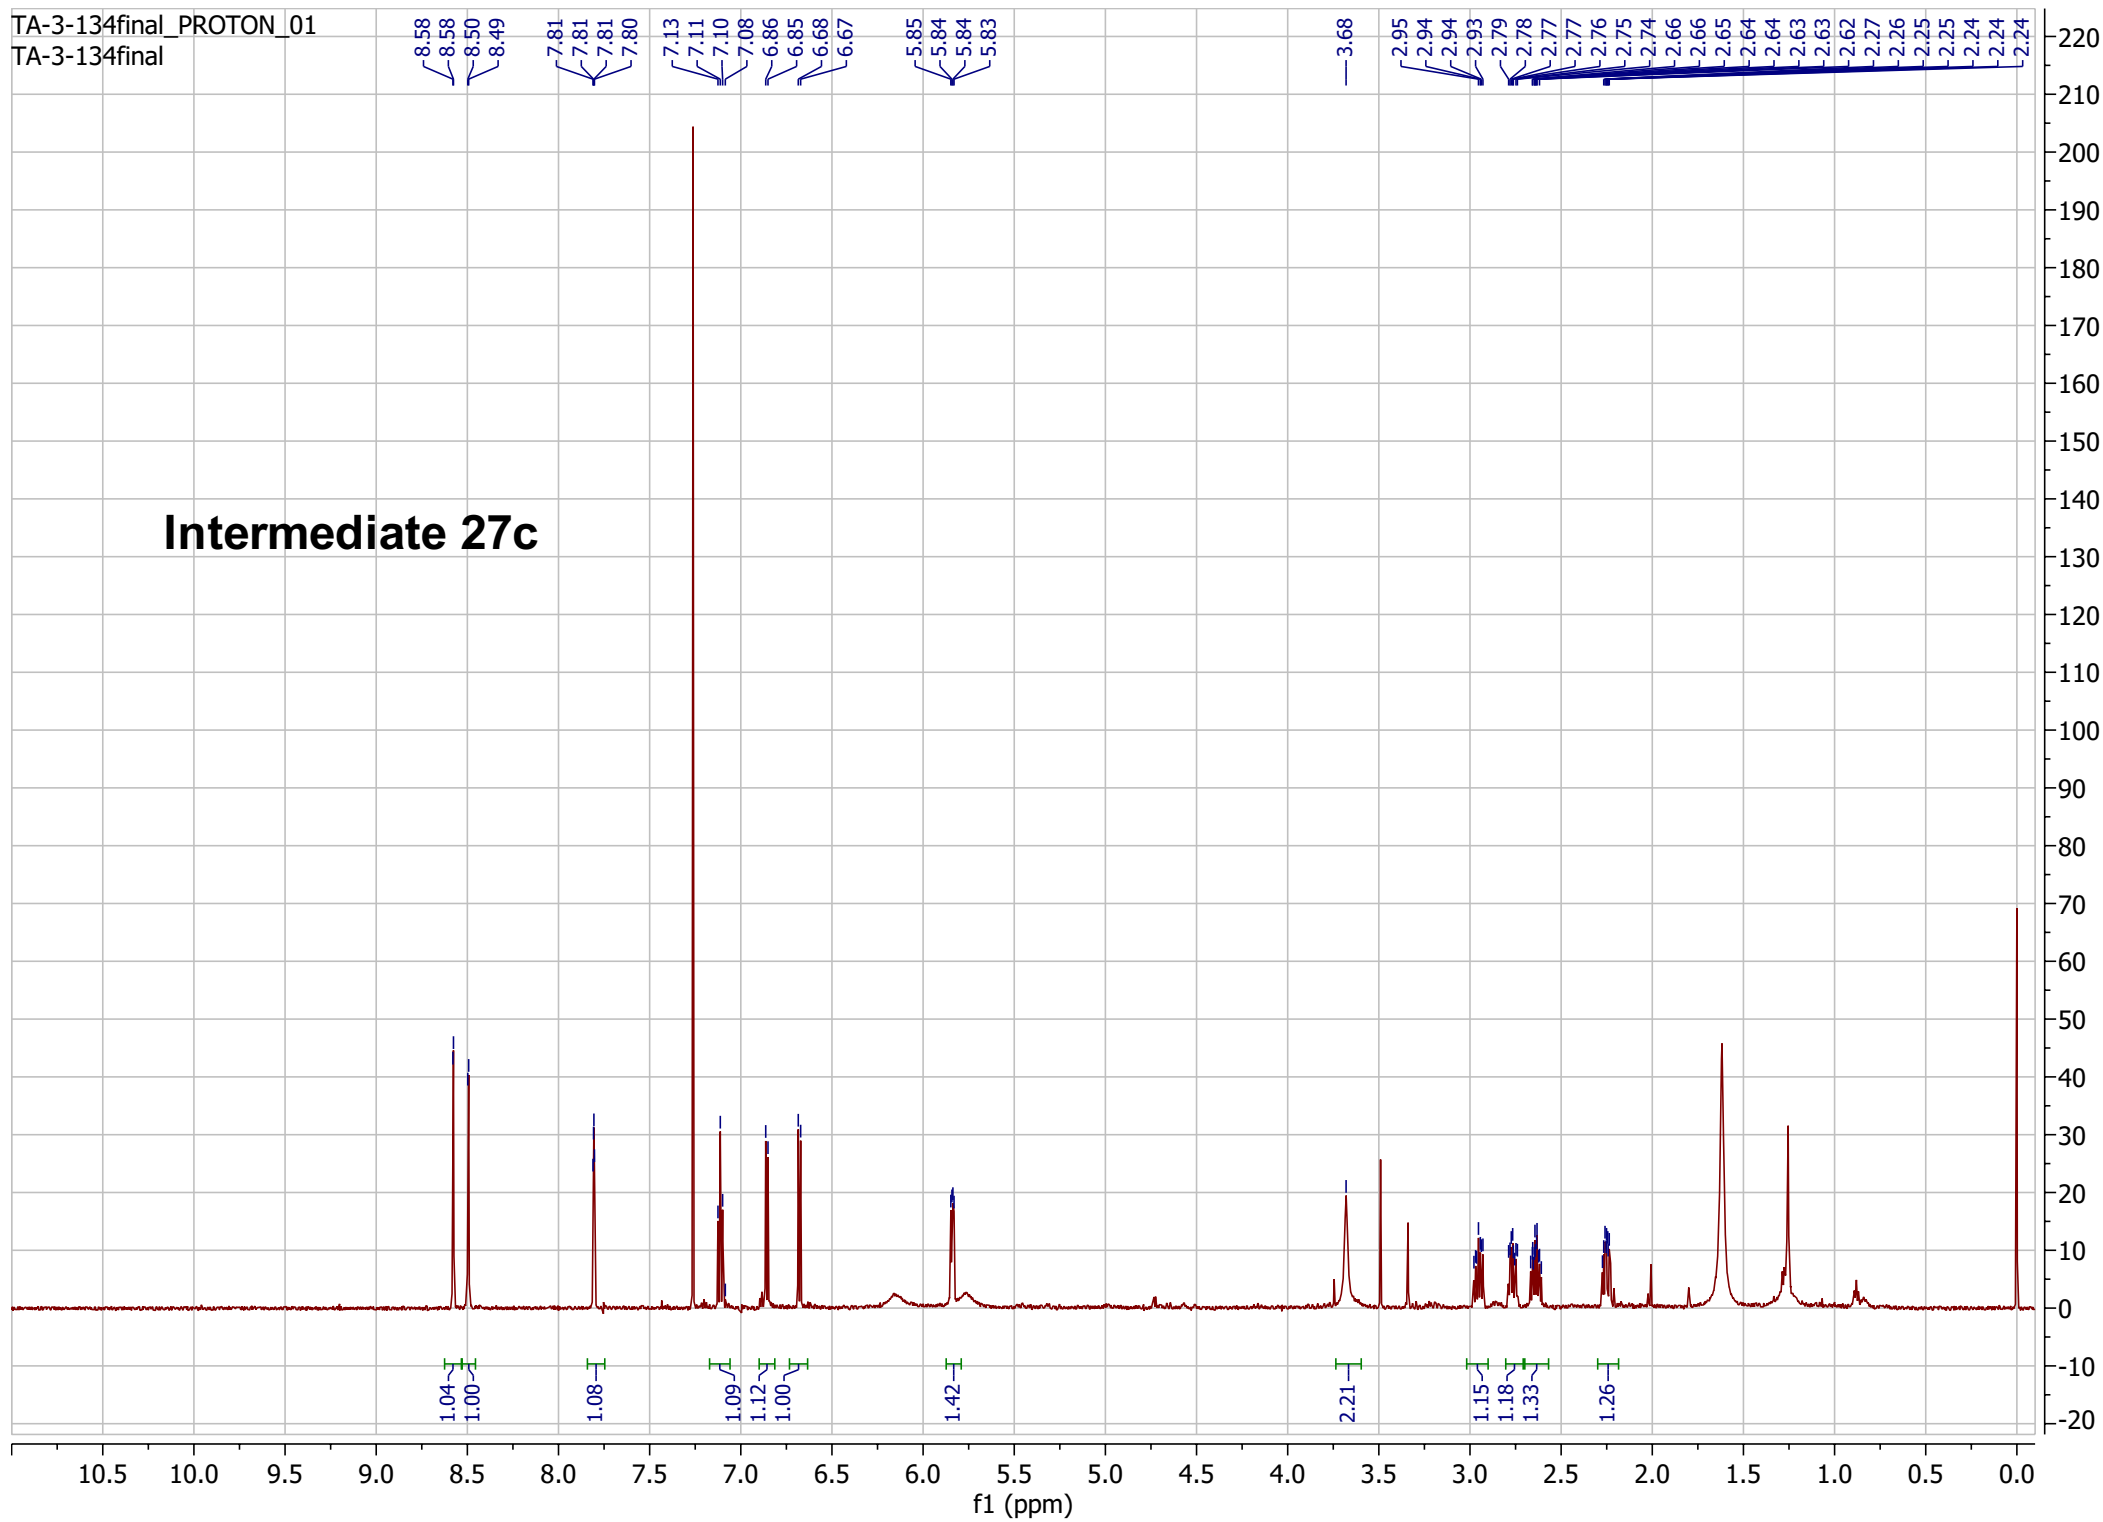



# Intermediate 27d

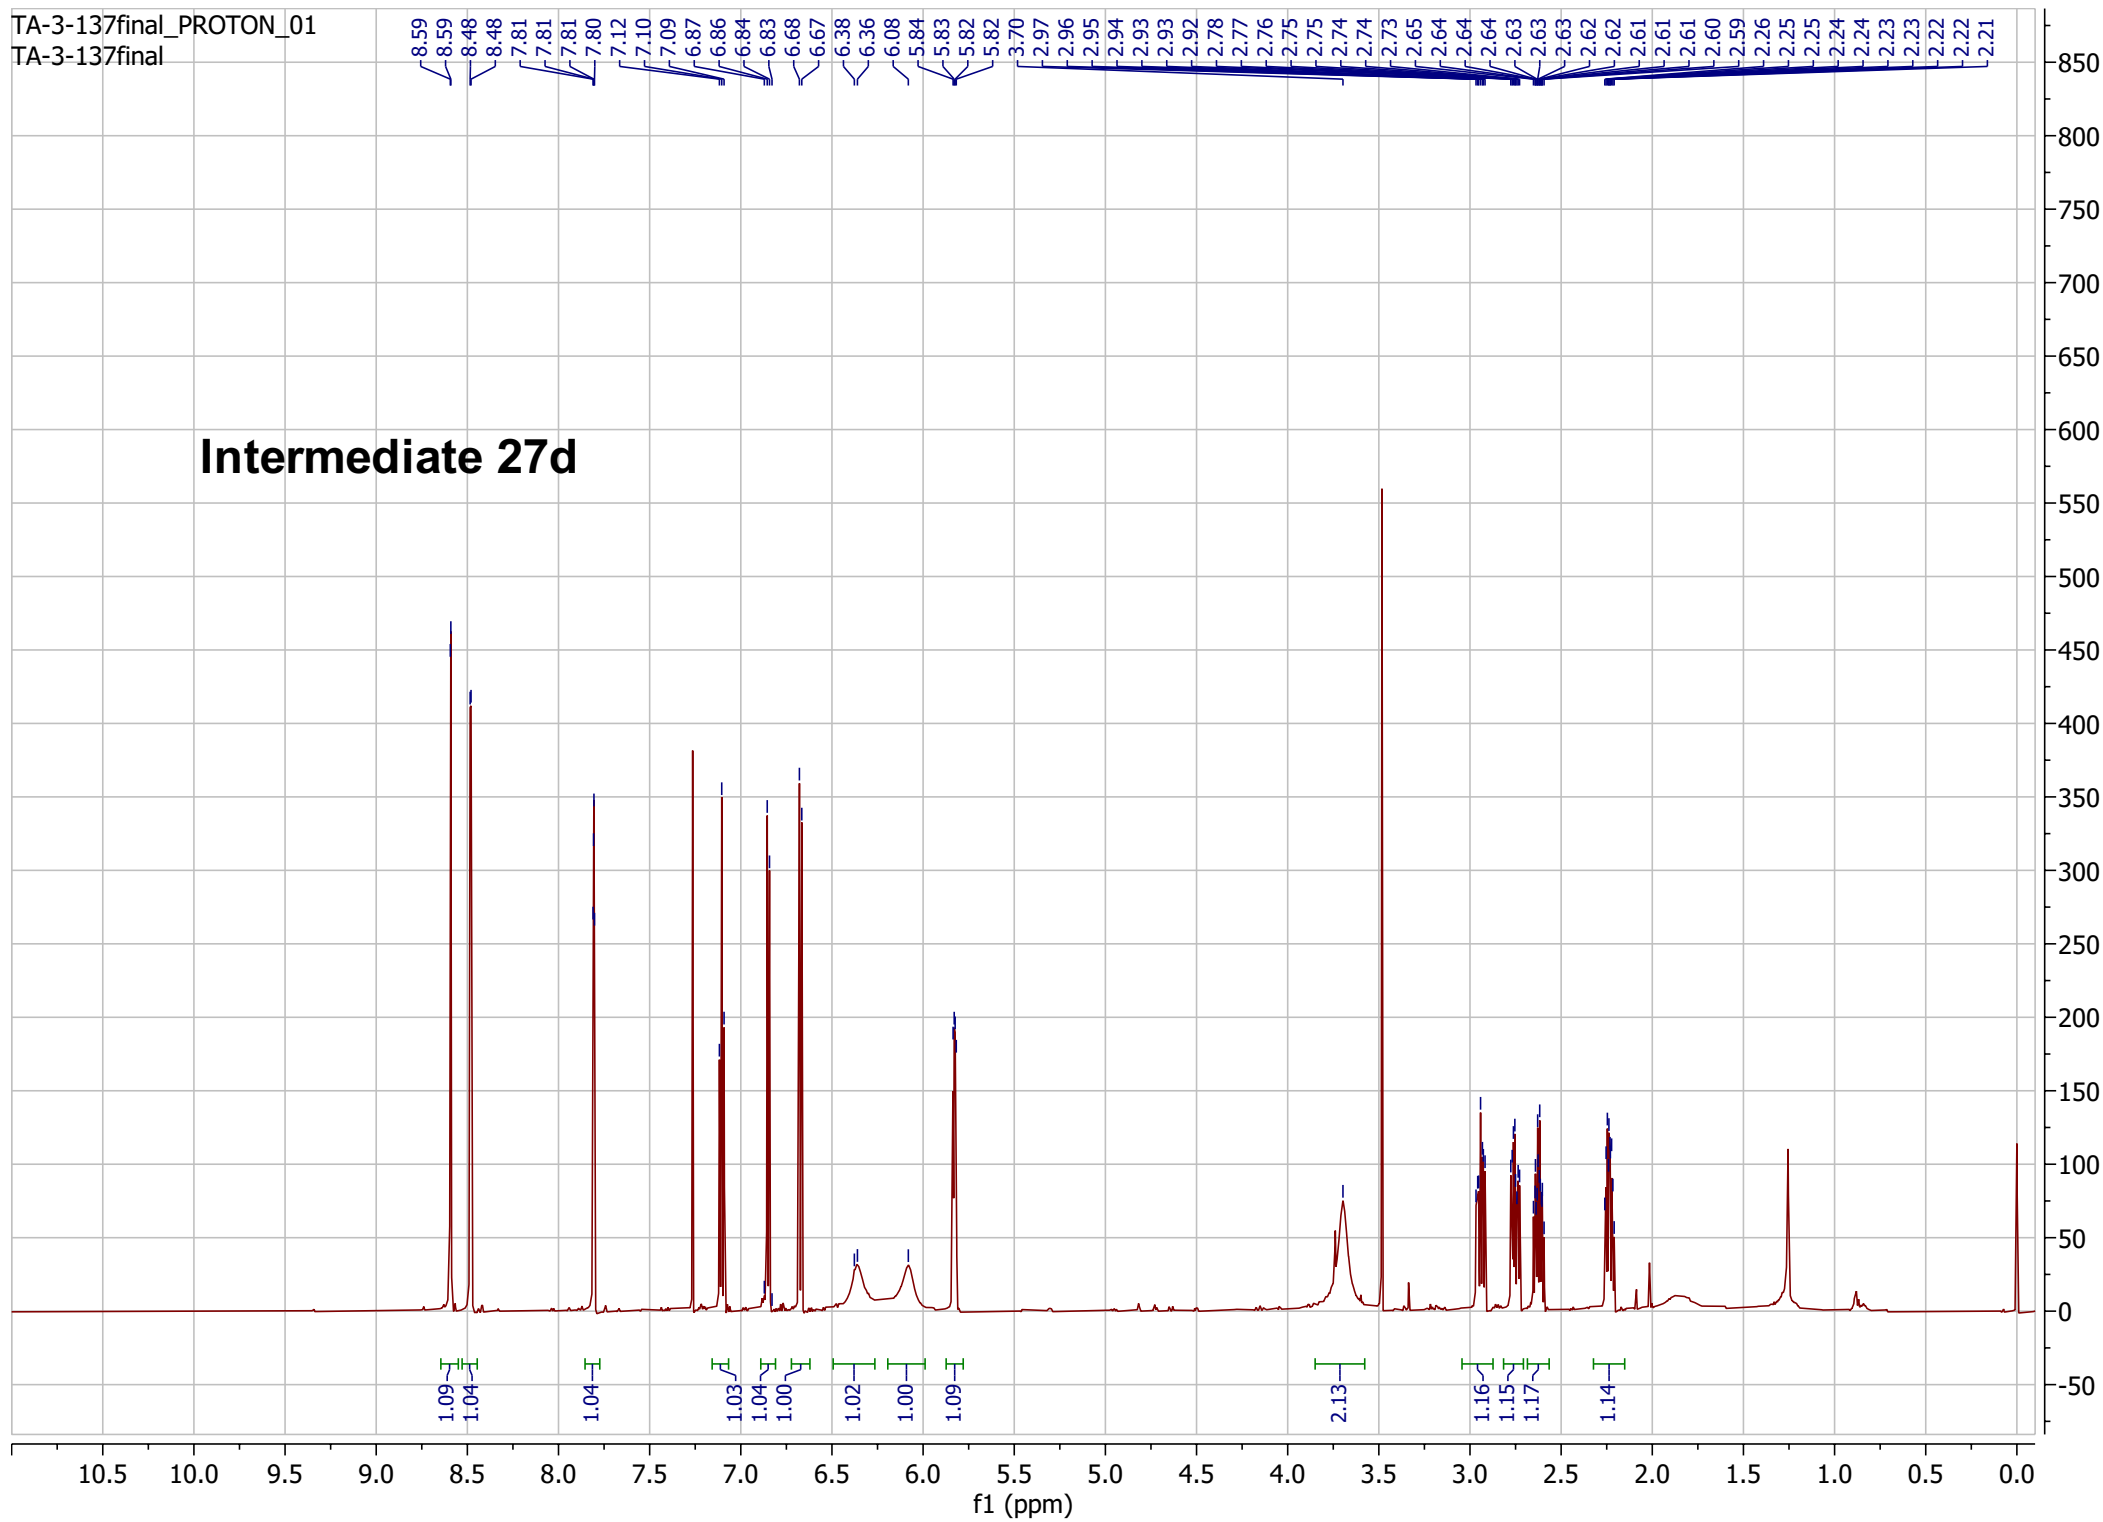

TA-2-031\_PROTON\_01  
TA-2-031

# Intermediate 27e

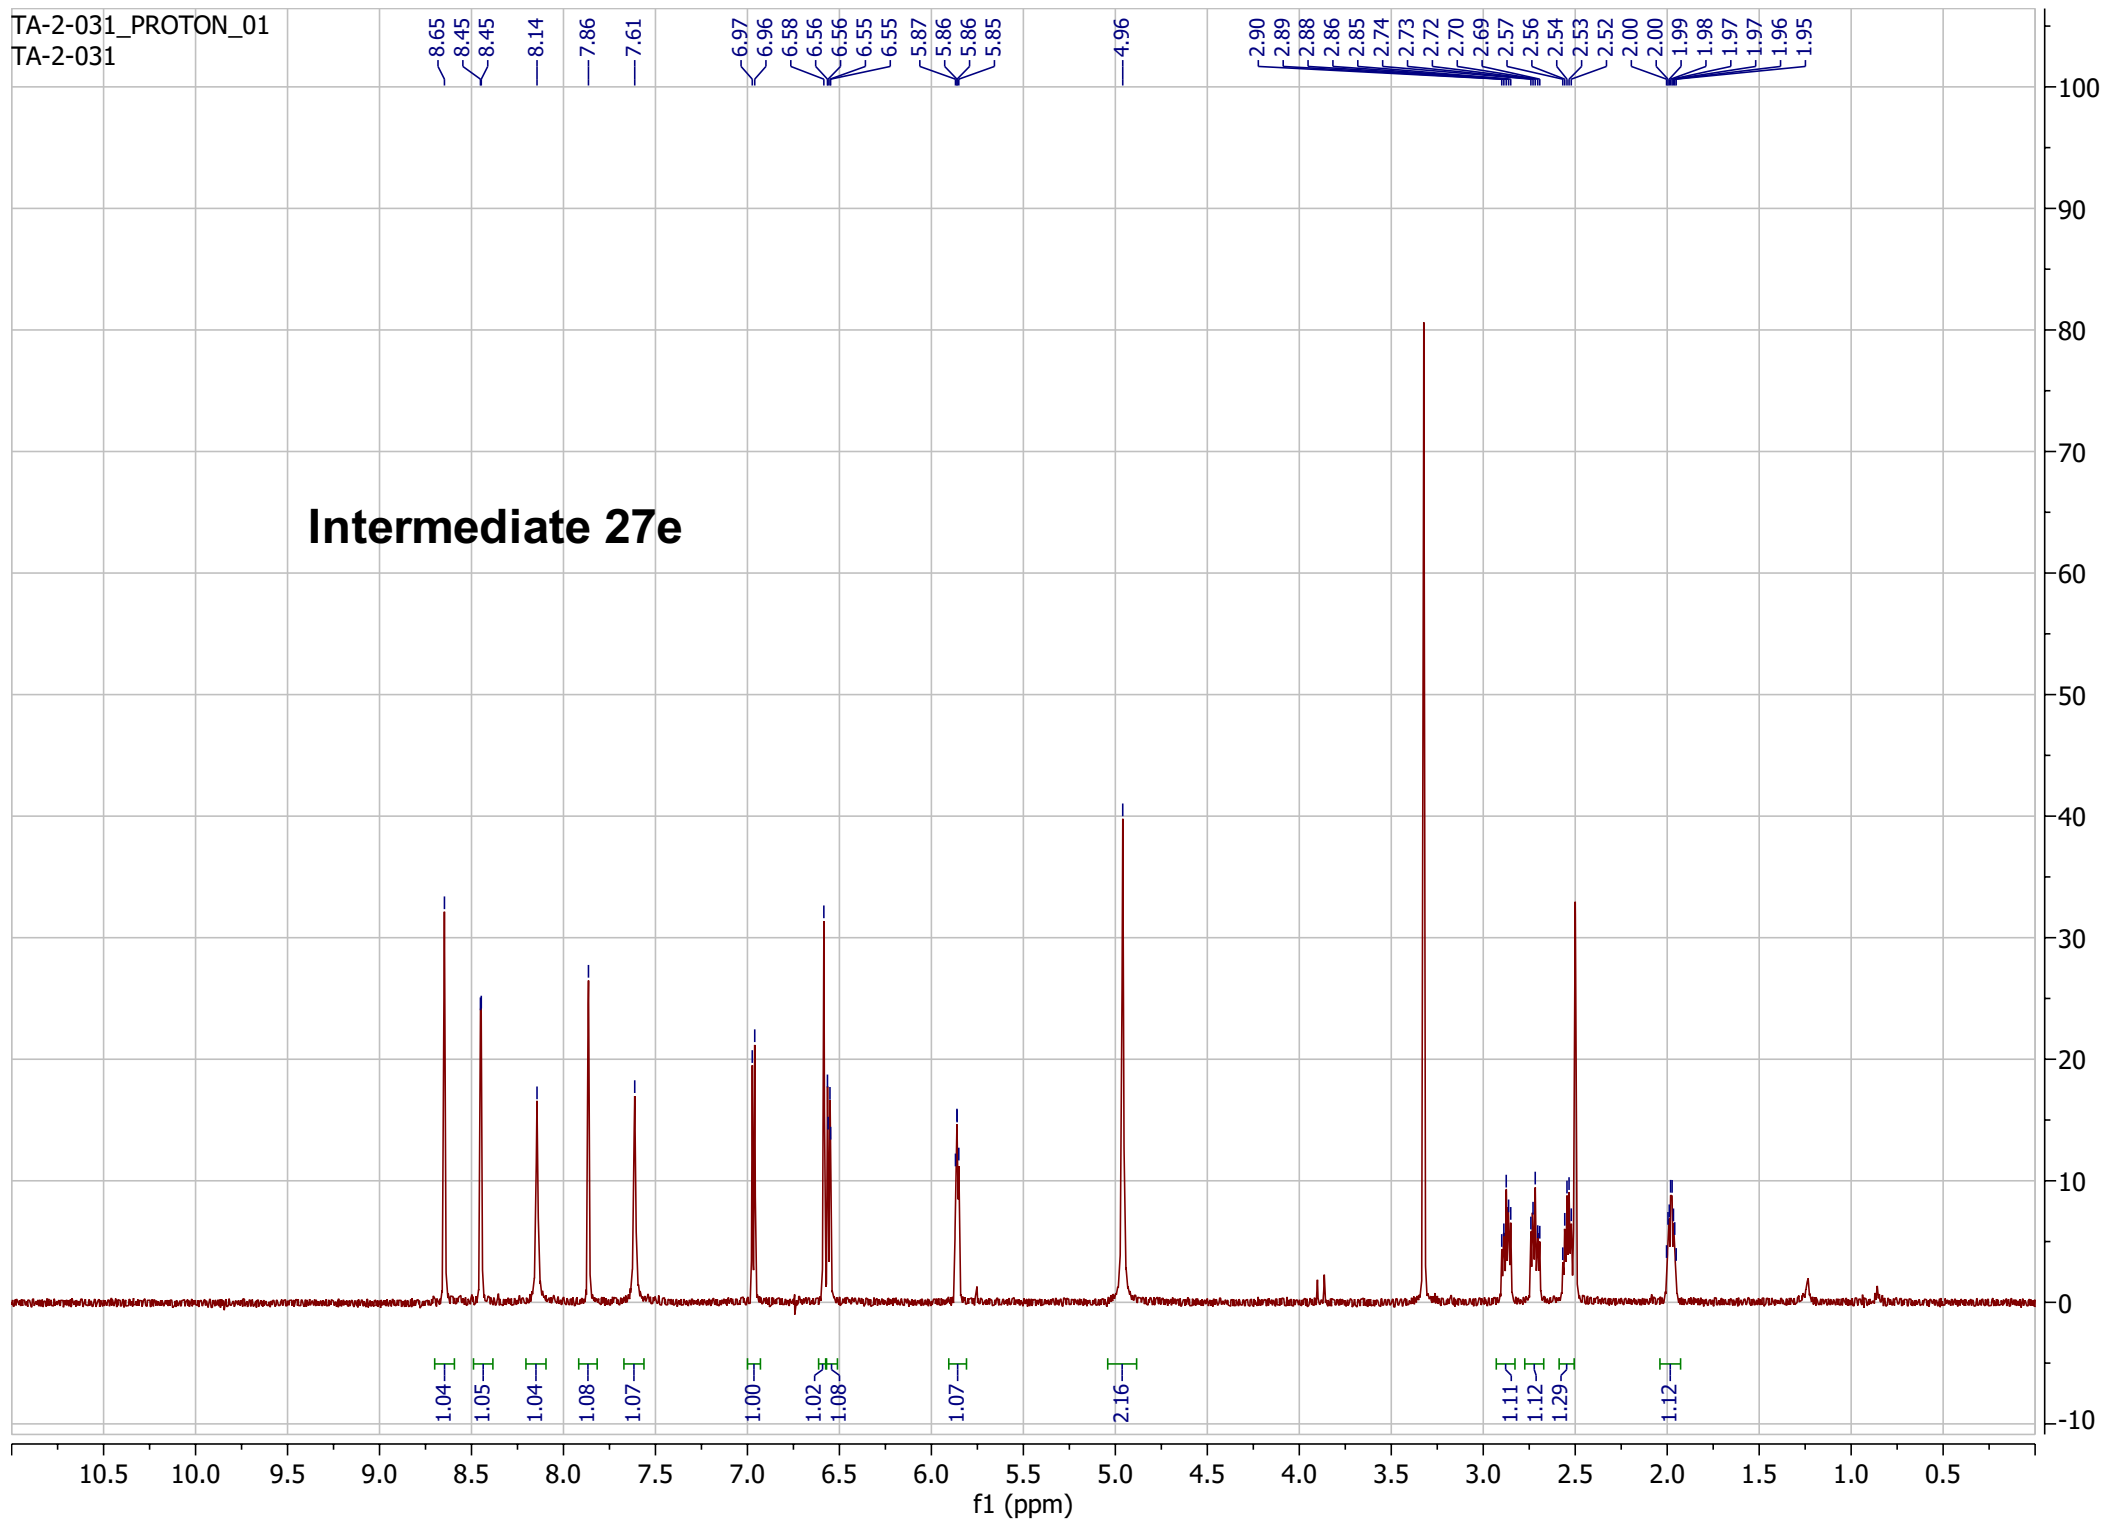

TA-3-035\_PROTON\_01  
TA-3-035

# Intermediate 27f

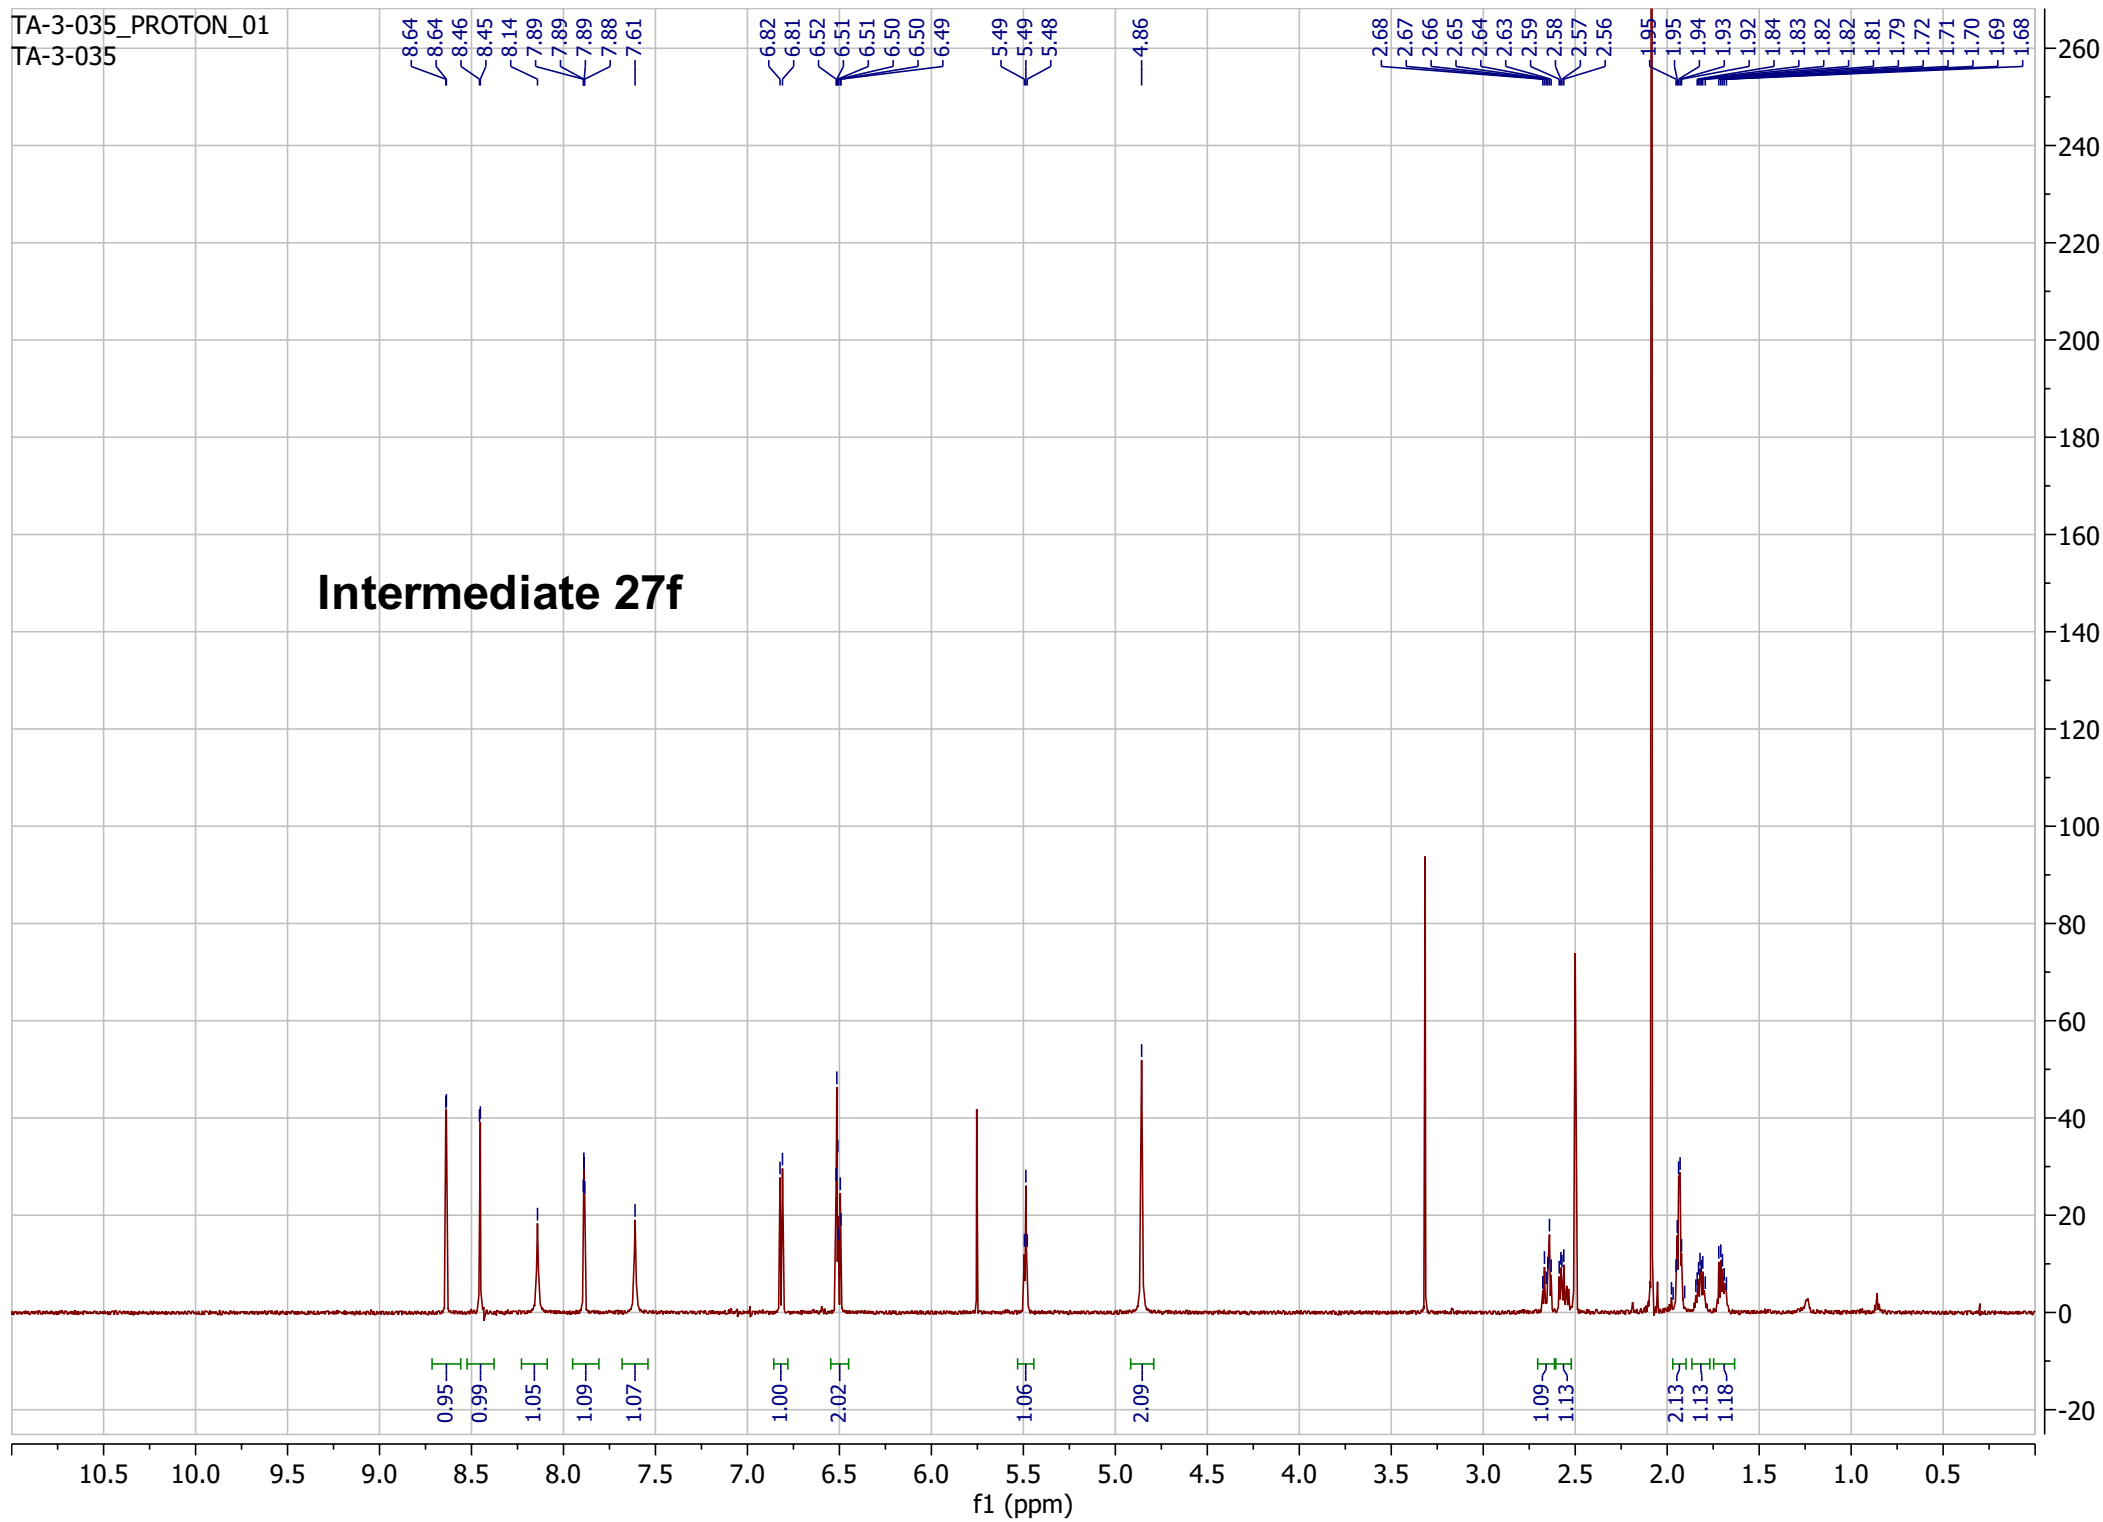

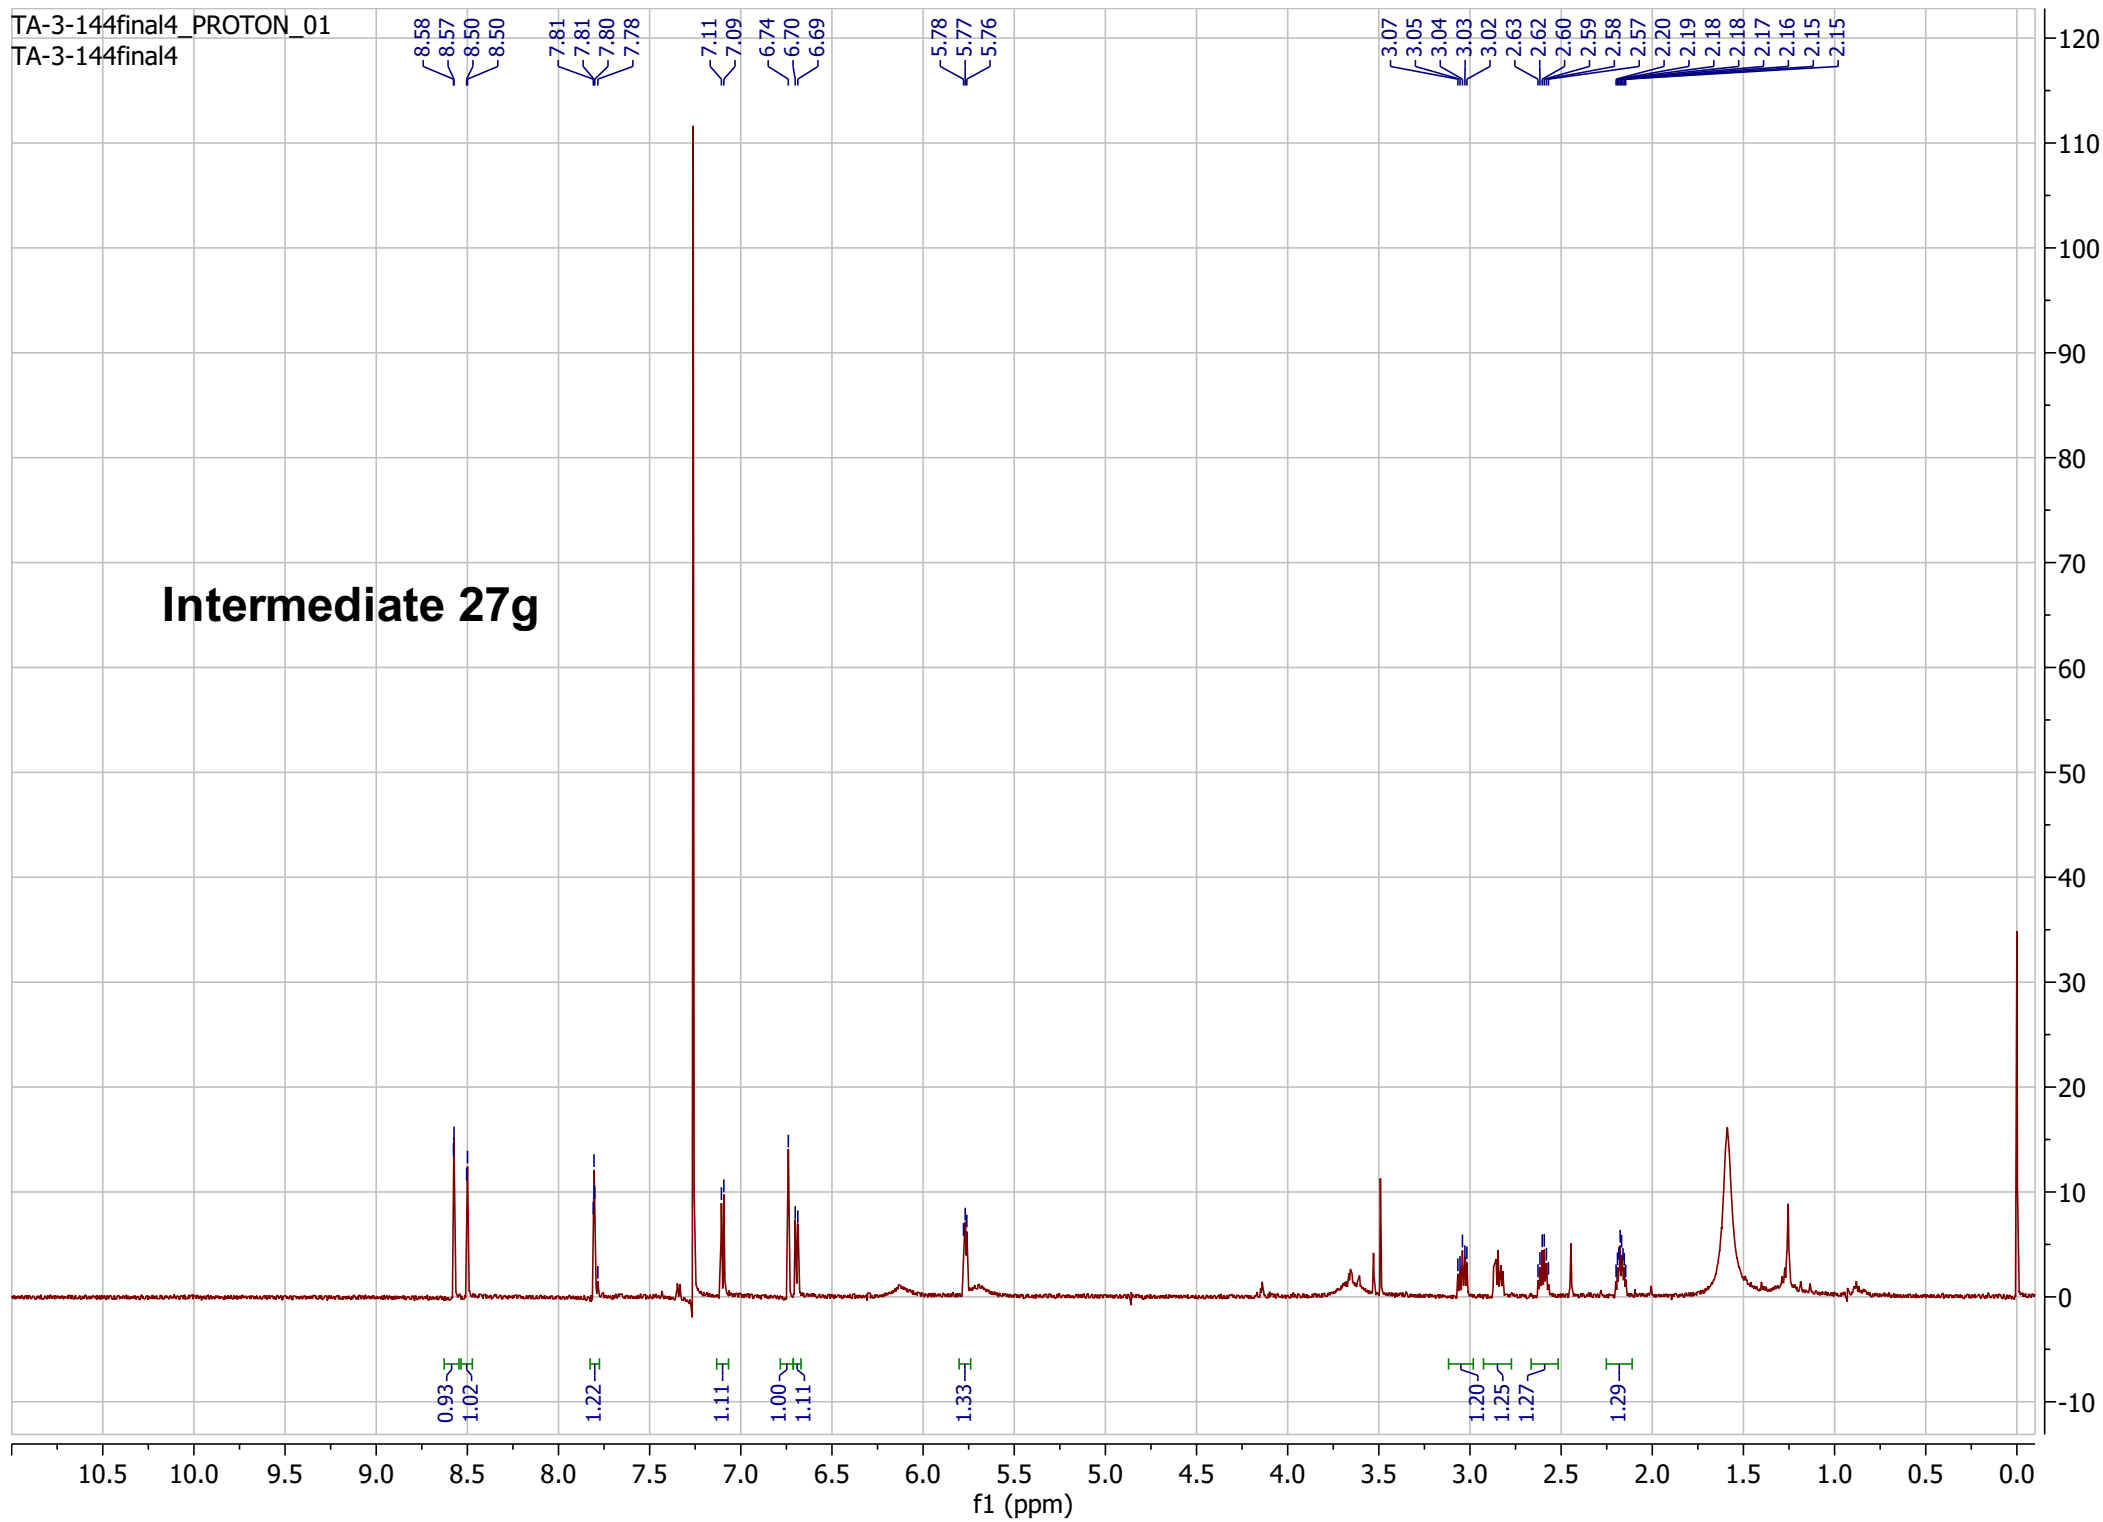

# Intermediate 27h

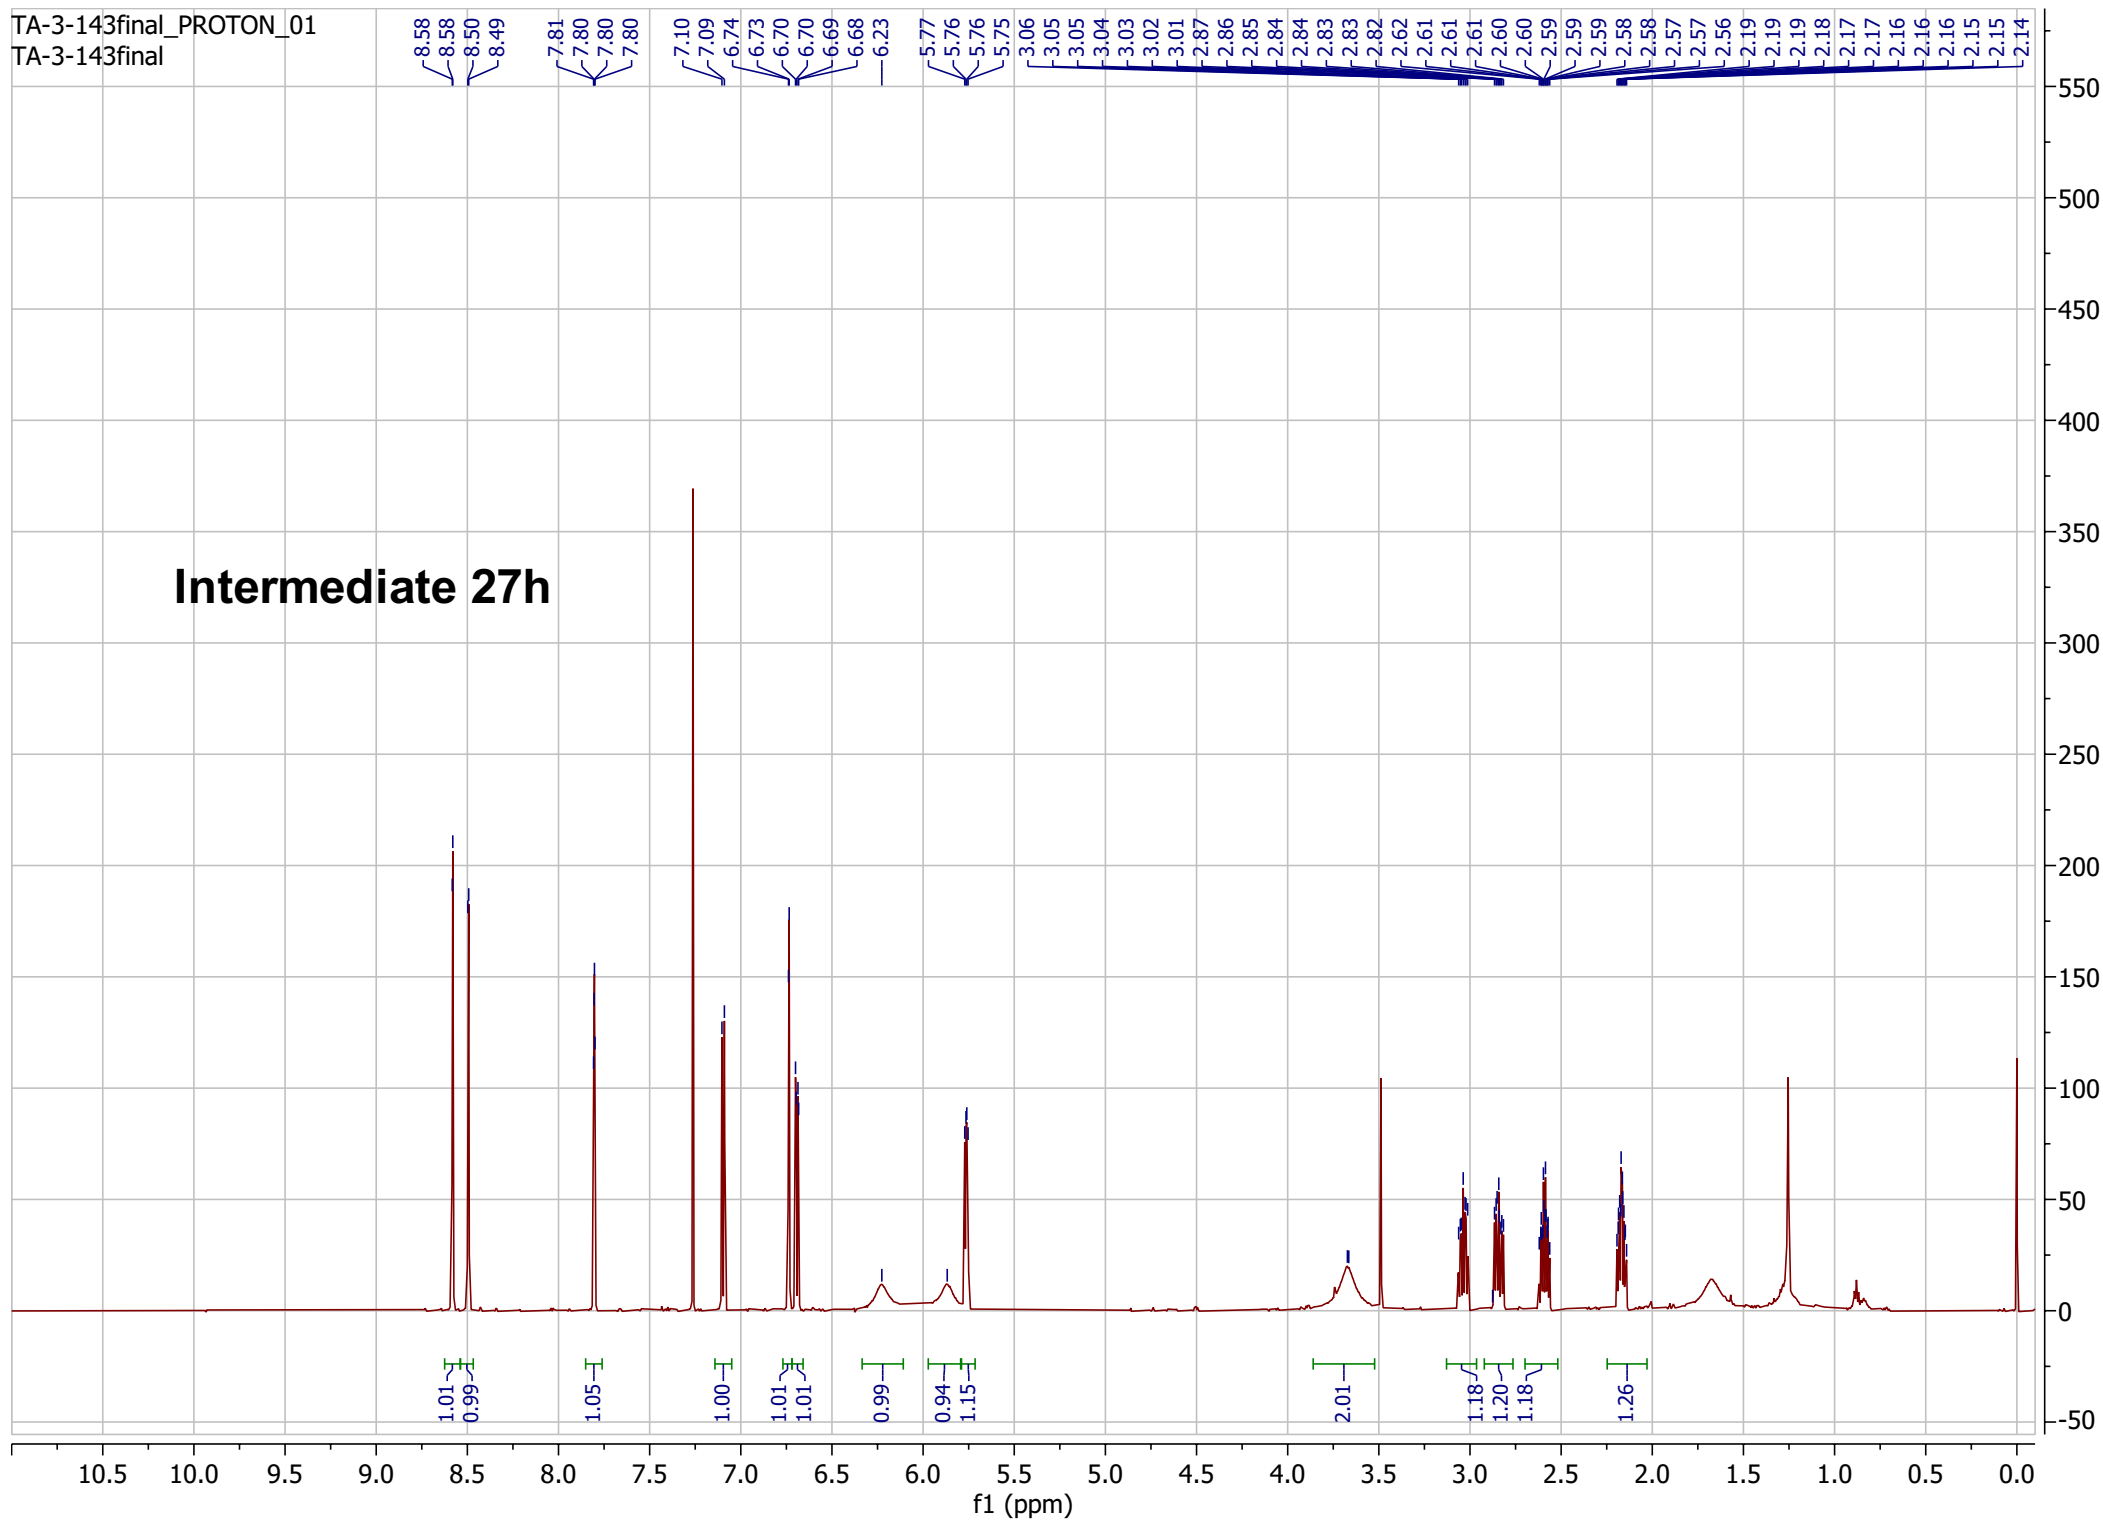

Sample Name: LC0420

**Compound 15a**

```
=====
Acq. Operator   : SYSTEM                      Seq. Line :   13
Acq. Instrument : CDD                        Location  :   Pl-B-04
Injection Date  : 4/15/2016 8:20:30 PM        Inj       :    1
                                           Inj Volume: 10.000 µl
Method          : C:\Chem32\1\Data\Sir2 Purity test MeCN_rui 2016-04-15 16-44-07\Sir2 purity_
                  30-100%MeCN.M (Sequence Method)
Last changed    : 4/15/2016 4:44:07 PM by SYSTEM
Method Info     : test
=====
```

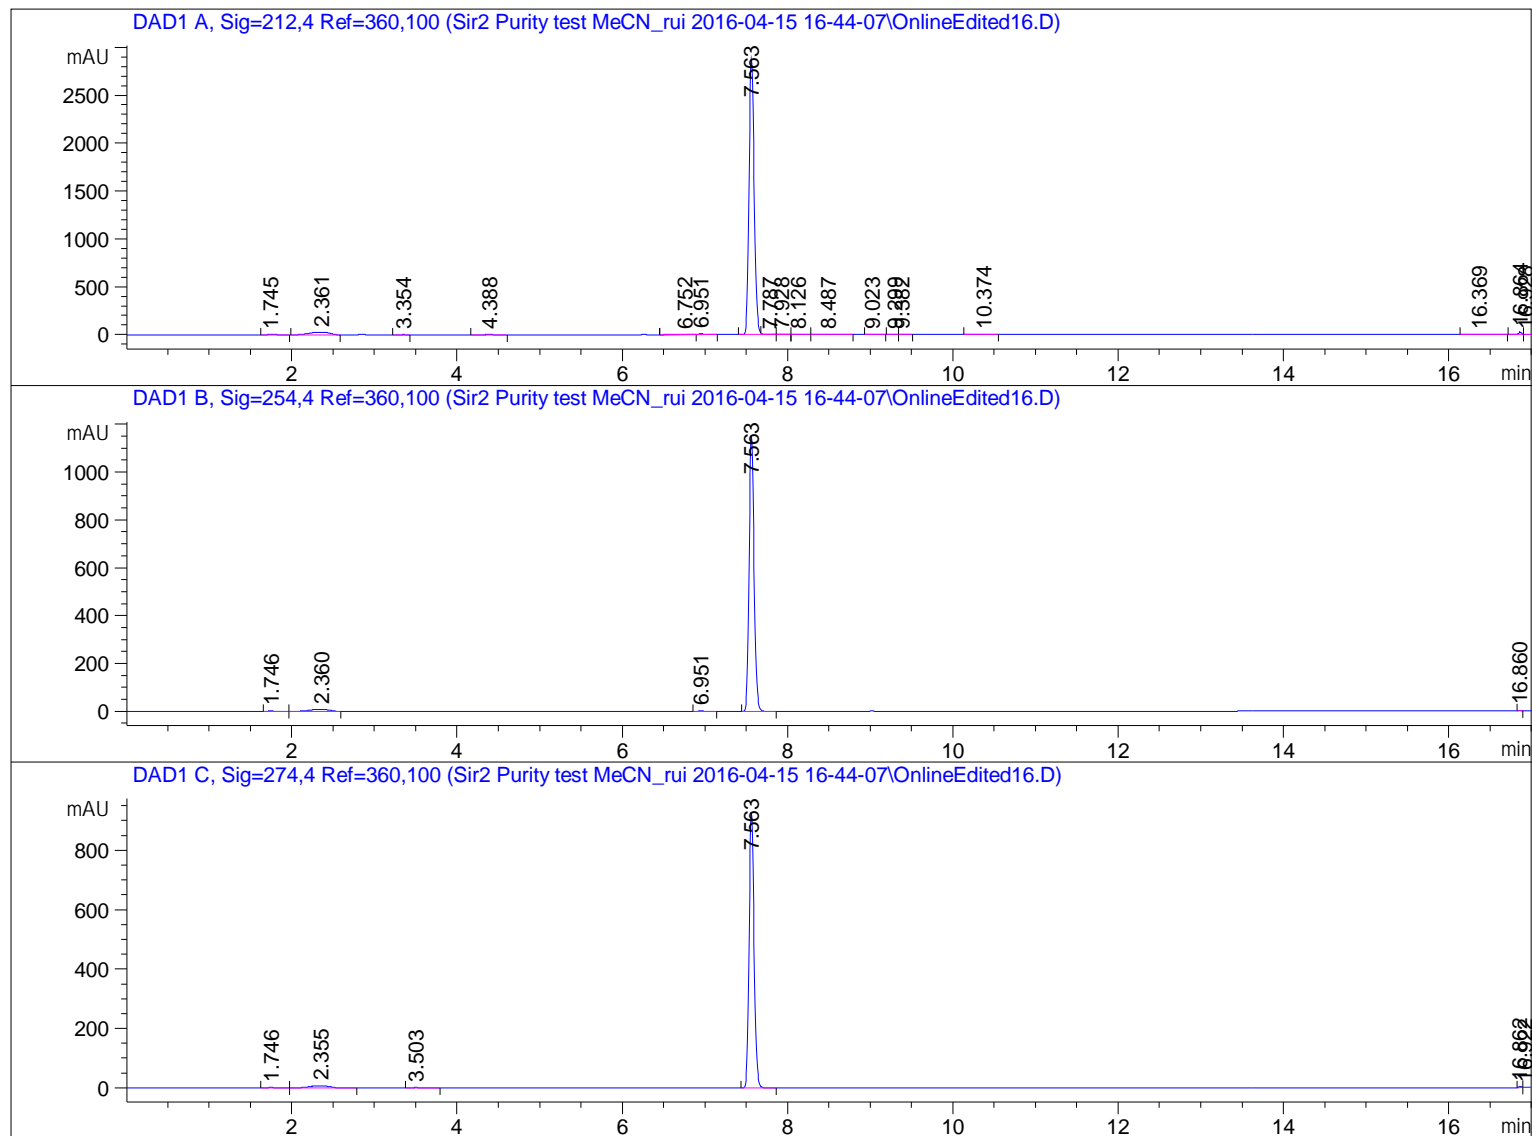

=====  
Area Percent Report  
=====

```
Sorted By      :      Signal
Multiplier     :      1.0000
Dilution       :      1.0000
Use Multiplier & Dilution Factor with ISTDs
```

Signal 1: DAD1 A, Sig=212,4 Ref=360,100

| Peak # | RetTime [min] | Type | Width [min] | Area [mAU*s] | Height [mAU] | Area %  |
|--------|---------------|------|-------------|--------------|--------------|---------|
| 1      | 1.745         | BB   | 0.0799      | 34.25770     | 6.06529      | 0.2593  |
| 2      | 2.361         | BB   | 0.2374      | 445.55951    | 27.73595     | 3.3722  |
| 3      | 3.354         | BB   | 0.0847      | 12.30412     | 2.09051      | 0.0931  |
| 4      | 4.388         | BB   | 0.0752      | 20.30573     | 4.14401      | 0.1537  |
| 5      | 6.752         | BV E | 0.1112      | 13.20377     | 1.61742      | 0.0999  |
| 6      | 6.951         | VB R | 0.0708      | 40.66706     | 8.65966      | 0.3078  |
| 7      | 7.563         | BV R | 0.0685      | 1.24793e4    | 2881.26001   | 94.4478 |
| 8      | 7.787         | VV E | 0.0859      | 9.98386      | 1.66689      | 0.0756  |
| 9      | 7.928         | VB E | 0.0674      | 12.17470     | 2.76358      | 0.0921  |
| 10     | 8.126         | BB   | 0.0794      | 5.90134      | 1.08546      | 0.0447  |
| 11     | 8.487         | BB   | 0.1104      | 8.71485      | 1.07668      | 0.0660  |
| 12     | 9.023         | BB   | 0.0692      | 13.54113     | 3.08426      | 0.1025  |
| 13     | 9.299         | BV   | 0.0663      | 7.10442      | 1.64785      | 0.0538  |
| 14     | 9.382         | VV   | 0.0899      | 8.37466      | 1.43871      | 0.0634  |
| 15     | 10.374        | BB   | 0.0781      | 7.30977      | 1.41798      | 0.0553  |
| 16     | 16.369        | BB   | 0.1947      | 24.75417     | 1.86637      | 0.1873  |
| 17     | 16.864        | BB   | 0.0422      | 62.28437     | 24.08801     | 0.4714  |
| 18     | 16.928        | BBA  | 0.0422      | 7.17131      | 2.59580      | 0.0543  |

Totals : 1.32129e4 2974.30443

Signal 2: DAD1 B, Sig=254,4 Ref=360,100

| Peak # | RetTime [min] | Type | Width [min] | Area [mAU*s] | Height [mAU] | Area %  |
|--------|---------------|------|-------------|--------------|--------------|---------|
| 1      | 1.746         | BB   | 0.0770      | 9.21249      | 1.70479      | 0.1861  |
| 2      | 2.360         | BB   | 0.2376      | 130.64775    | 8.12622      | 2.6395  |
| 3      | 6.951         | VB   | 0.0723      | 8.34252      | 1.72982      | 0.1685  |
| 4      | 7.563         | BB   | 0.0645      | 4792.79492   | 1154.02332   | 96.8300 |
| 5      | 16.860        | BB   | 0.0373      | 8.70266      | 4.01958      | 0.1758  |

Totals : 4949.70034 1169.60372

Signal 3: DAD1 C, Sig=274,4 Ref=360,100

| Peak # | RetTime [min] | Type | Width [min] | Area [mAU*s] | Height [mAU] | Area %  |
|--------|---------------|------|-------------|--------------|--------------|---------|
| 1      | 1.746         | BB   | 0.0770      | 7.78699      | 1.44180      | 0.1946  |
| 2      | 2.355         | BB   | 0.2390      | 111.03525    | 6.92636      | 2.7750  |
| 3      | 3.503         | BB   | 0.1057      | 7.36647      | 1.02670      | 0.1841  |
| 4      | 7.563         | BB   | 0.0644      | 3860.36646   | 930.11615    | 96.4776 |
| 5      | 16.862        | BV   | 0.0397      | 9.23295      | 3.89522      | 0.2307  |
| 6      | 16.922        | VBA  | 0.0482      | 5.52230      | 1.68586      | 0.1380  |

Totals : 4001.31041 945.09209

=====  
\*\*\* End of Report \*\*\*



Sample Name: LC0511

**Compound 15b**

```
=====
Acq. Operator   : SYSTEM                      Seq. Line :   17
Acq. Instrument : CDD                        Location  :   Pl-B-08
Injection Date  : 4/15/2016 9:32:16 PM        Inj       :    1
                                           Inj Volume: 10.000 µl
Method         : C:\Chem32\1\Data\Sir2 Purity test MeCN_rui 2016-04-15 16-44-07\Sir2 purity_
                30-100%MeCN.M (Sequence Method)
Last changed    : 4/15/2016 4:44:07 PM by SYSTEM
Method Info     : test
=====
```

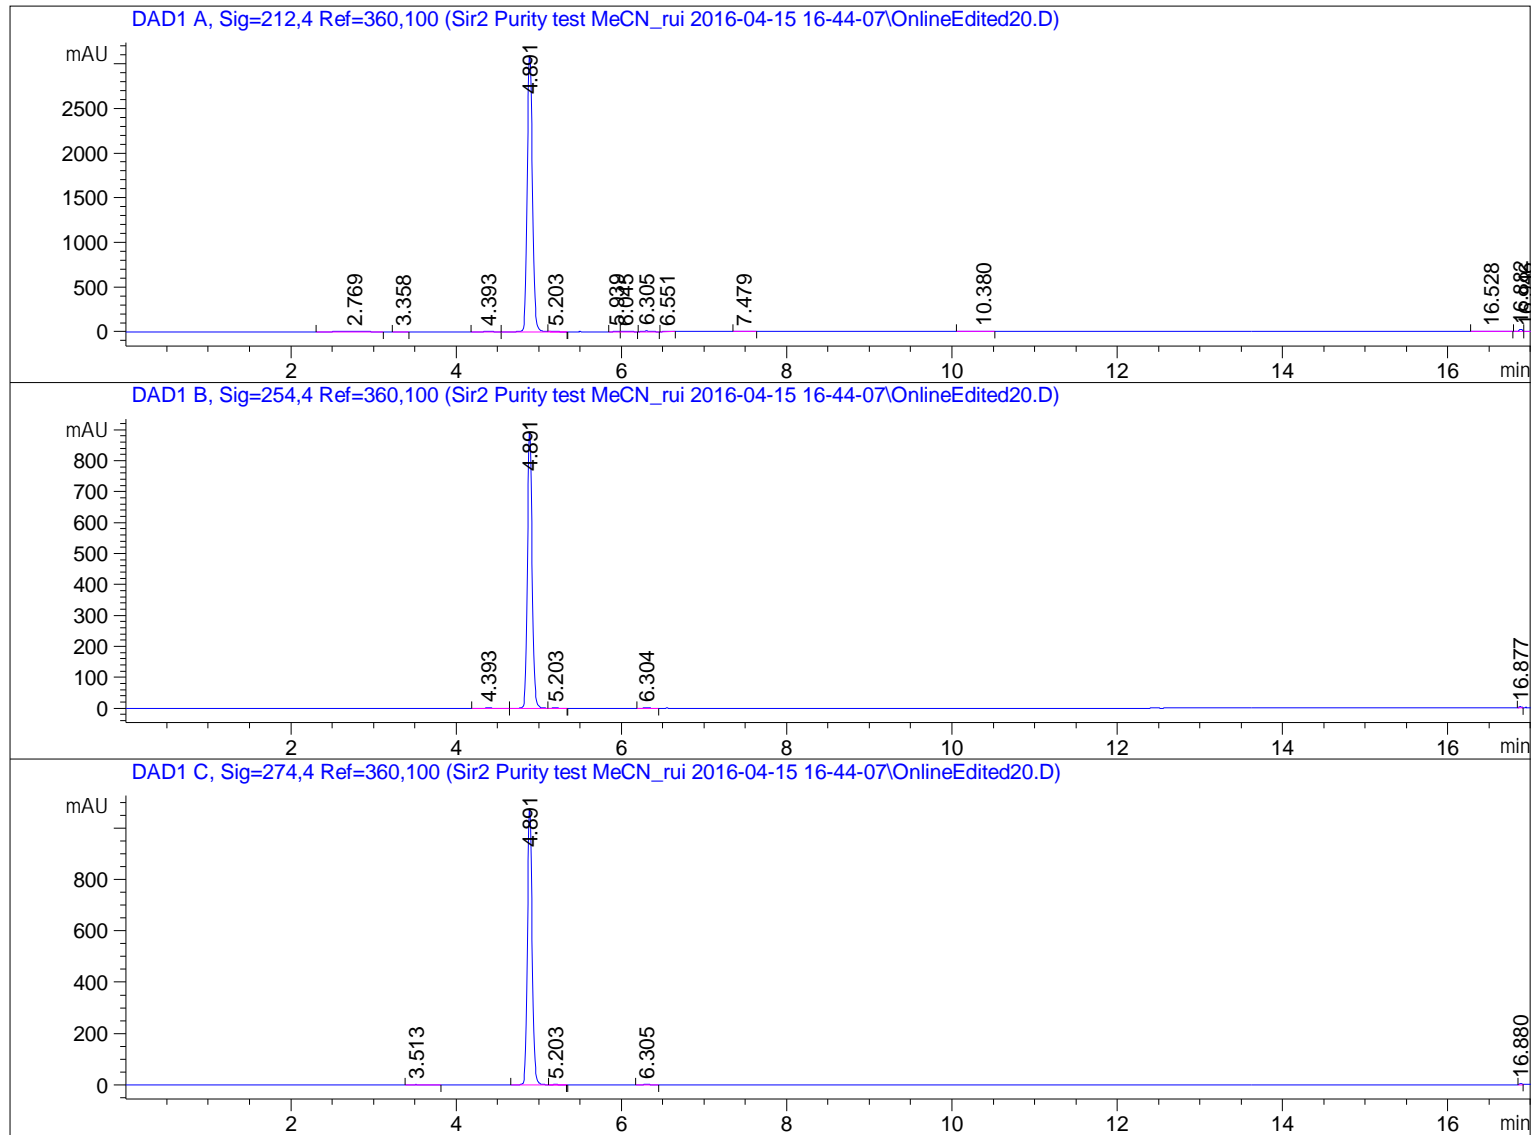

=====  
Area Percent Report  
=====

```
Sorted By      :      Signal
Multiplier     :      1.0000
Dilution       :      1.0000
Use Multiplier & Dilution Factor with ISTDs
```

Signal 1: DAD1 A, Sig=212,4 Ref=360,100

| Peak # | RetTime [min] | Type | Width [min] | Area [mAU*s] | Height [mAU] | Area %  |
|--------|---------------|------|-------------|--------------|--------------|---------|
| 1      | 2.769         | BB   | 0.3503      | 89.69124     | 3.32913      | 0.6379  |
| 2      | 3.358         | BB   | 0.0821      | 11.45496     | 1.96372      | 0.0815  |
| 3      | 4.393         | BB   | 0.0754      | 28.89342     | 5.86935      | 0.2055  |
| 4      | 4.891         | BV R | 0.0716      | 1.37323e4    | 3104.90112   | 97.6619 |
| 5      | 5.203         | VB E | 0.0610      | 24.93639     | 6.45880      | 0.1773  |
| 6      | 5.939         | VV   | 0.0621      | 7.33439      | 1.85440      | 0.0522  |
| 7      | 6.045         | VB   | 0.0686      | 9.38280      | 2.08290      | 0.0667  |
| 8      | 6.305         | BB   | 0.0687      | 38.29269     | 8.47715      | 0.2723  |
| 9      | 6.551         | BB   | 0.0627      | 16.82673     | 4.20080      | 0.1197  |
| 10     | 7.479         | BB   | 0.0893      | 8.61263      | 1.37098      | 0.0613  |
| 11     | 10.380        | BB   | 0.0762      | 7.04870      | 1.41374      | 0.0501  |
| 12     | 16.528        | BB   | 0.2113      | 25.10757     | 1.81606      | 0.1786  |
| 13     | 16.882        | BB   | 0.0404      | 54.55837     | 22.40466     | 0.3880  |
| 14     | 16.946        | BBA  | 0.0392      | 6.62195      | 2.64574      | 0.0471  |

Totals : 1.40611e4 3168.78855

Signal 2: DAD1 B, Sig=254,4 Ref=360,100

| Peak # | RetTime [min] | Type | Width [min] | Area [mAU*s] | Height [mAU] | Area %  |
|--------|---------------|------|-------------|--------------|--------------|---------|
| 1      | 4.393         | BB   | 0.0784      | 6.13708      | 1.18549      | 0.1708  |
| 2      | 4.891         | BV R | 0.0623      | 3563.33325   | 898.31262    | 99.1980 |
| 3      | 5.203         | VB E | 0.0611      | 6.52240      | 1.68542      | 0.1816  |
| 4      | 6.304         | BB   | 0.0674      | 7.63521      | 1.73198      | 0.2126  |
| 5      | 16.877        | BB   | 0.0370      | 8.51307      | 3.97494      | 0.2370  |

Totals : 3592.14102 906.89045

Signal 3: DAD1 C, Sig=274,4 Ref=360,100

| Peak # | RetTime [min] | Type | Width [min] | Area [mAU*s] | Height [mAU] | Area %  |
|--------|---------------|------|-------------|--------------|--------------|---------|
| 1      | 3.513         | BB   | 0.1139      | 8.37626      | 1.06360      | 0.1936  |
| 2      | 4.891         | BV R | 0.0623      | 4293.36816   | 1082.89722   | 99.2457 |
| 3      | 5.203         | VB E | 0.0604      | 6.45765      | 1.69778      | 0.1493  |
| 4      | 6.305         | BB   | 0.0702      | 9.12161      | 1.96493      | 0.2109  |
| 5      | 16.880        | BV   | 0.0394      | 8.67743      | 3.68964      | 0.2006  |

Totals : 4326.00112 1091.31317

=====  
\*\*\* End of Report \*\*\*

Sample Name: LC0424

**Compound 16a**

```
=====
Acq. Operator   : SYSTEM                      Seq. Line :   19
Acq. Instrument : CDD                        Location  :   Pl-C-01
Injection Date  : 4/15/2016 10:08:08 PM      Inj       :    1
                                           Inj Volume: 10.000 µl
Method         : C:\Chem32\1\Data\Sir2 Purity test MeCN_rui 2016-04-15 16-44-07\Sir2 purity_
                30-100%MeCN.M (Sequence Method)
Last changed    : 4/15/2016 4:44:07 PM by SYSTEM
Method Info     : test
=====
```

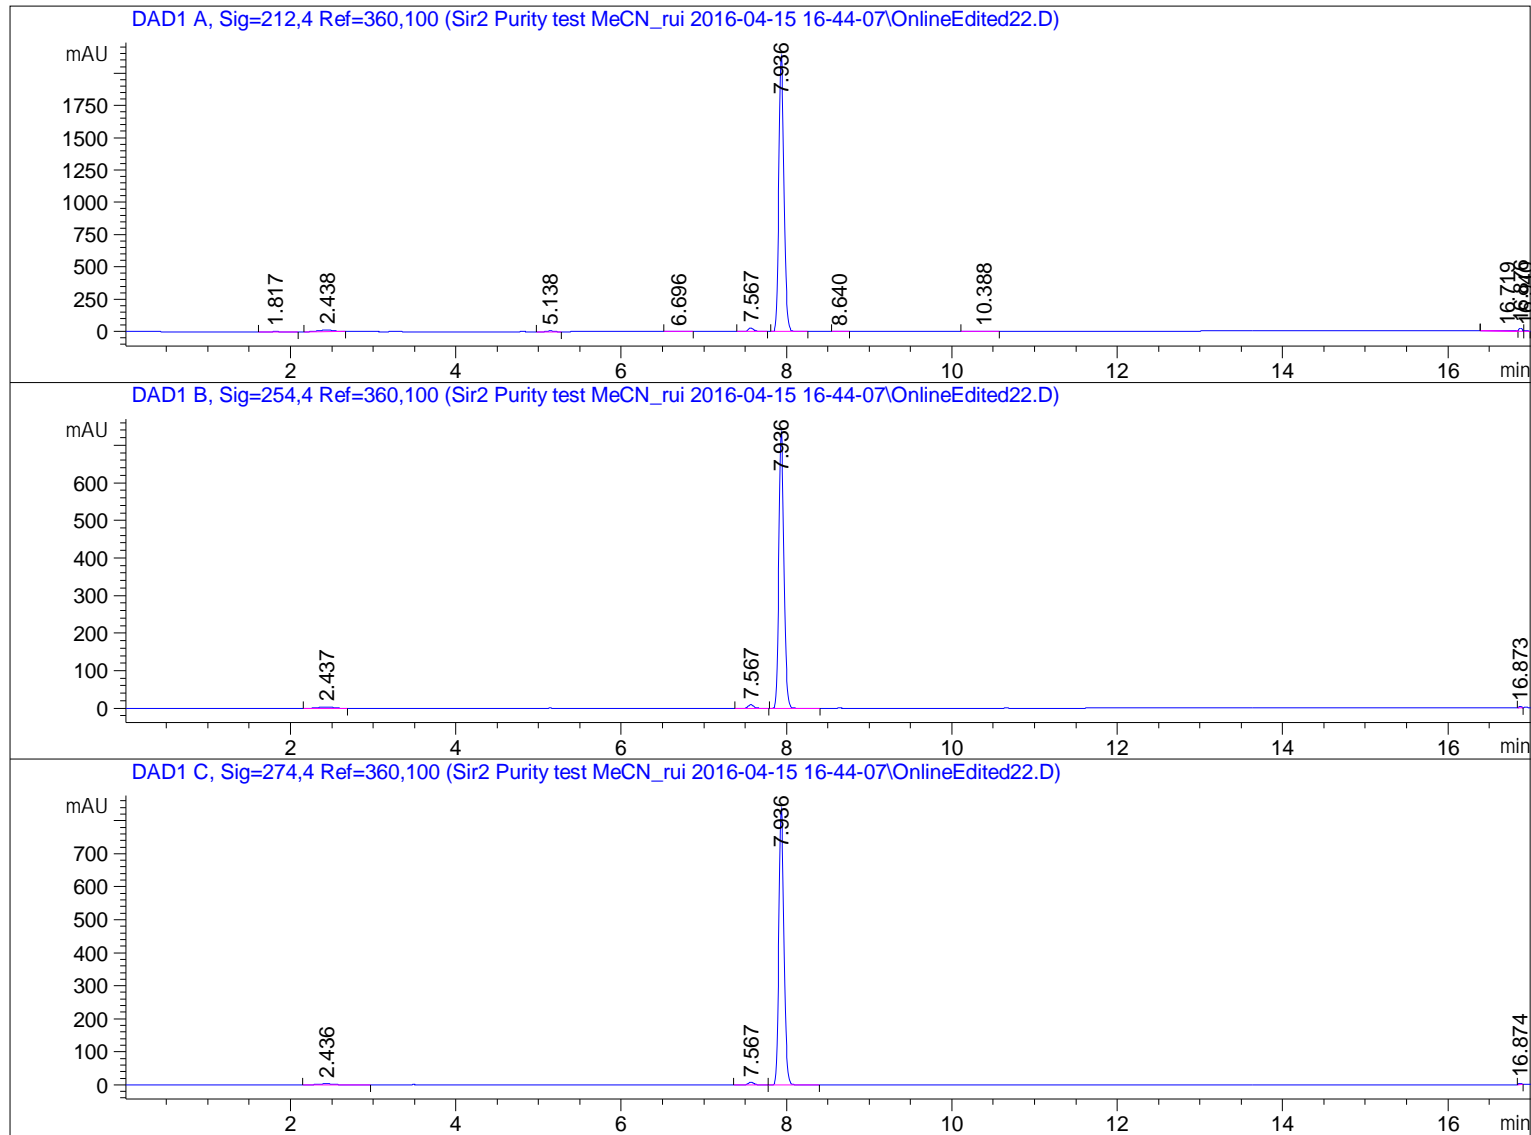

=====  
**Area Percent Report**  
=====

```
Sorted By      :      Signal
Multiplier     :      1.0000
Dilution       :      1.0000
Use Multiplier & Dilution Factor with ISTDs
```

Signal 1: DAD1 A, Sig=212,4 Ref=360,100

| Peak # | RetTime [min] | Type | Width [min] | Area [mAU*s] | Height [mAU] | Area %  |
|--------|---------------|------|-------------|--------------|--------------|---------|
| 1      | 1.817         | BB   | 0.1071      | 8.34913      | 1.06936      | 0.0866  |
| 2      | 2.438         | BB   | 0.1786      | 156.39441    | 12.44976     | 1.6224  |
| 3      | 5.138         | BB   | 0.0639      | 27.44308     | 6.69014      | 0.2847  |
| 4      | 6.696         | BB   | 0.0944      | 8.74076      | 1.30026      | 0.0907  |
| 5      | 7.567         | BB   | 0.0683      | 124.27000    | 27.69481     | 1.2892  |
| 6      | 7.936         | BB   | 0.0661      | 9186.12988   | 2137.25757   | 95.2963 |
| 7      | 8.640         | BB   | 0.0716      | 5.58220      | 1.21518      | 0.0579  |
| 8      | 10.388        | BB   | 0.0799      | 5.98445      | 1.09215      | 0.0621  |
| 9      | 16.719        | BV E | 0.2247      | 50.04313     | 3.34234      | 0.5191  |
| 10     | 16.876        | VB R | 0.0405      | 60.47182     | 24.72046     | 0.6273  |
| 11     | 16.940        | BBA  | 0.0380      | 6.13327      | 2.55244      | 0.0636  |

Totals : 9639.54214 2219.38447

Signal 2: DAD1 B, Sig=254,4 Ref=360,100

| Peak # | RetTime [min] | Type | Width [min] | Area [mAU*s] | Height [mAU] | Area %  |
|--------|---------------|------|-------------|--------------|--------------|---------|
| 1      | 2.437         | BB   | 0.1803      | 46.18706     | 3.63339      | 1.4268  |
| 2      | 7.567         | BB   | 0.0679      | 43.50428     | 9.77919      | 1.3439  |
| 3      | 7.936         | BB   | 0.0658      | 3138.62915   | 735.91669    | 96.9569 |
| 4      | 16.873        | BB   | 0.0369      | 8.81914      | 4.13848      | 0.2724  |

Totals : 3237.13963 753.46774

Signal 3: DAD1 C, Sig=274,4 Ref=360,100

| Peak # | RetTime [min] | Type | Width [min] | Area [mAU*s] | Height [mAU] | Area %  |
|--------|---------------|------|-------------|--------------|--------------|---------|
| 1      | 2.436         | BB   | 0.1981      | 42.43031     | 3.13097      | 1.1595  |
| 2      | 7.567         | BB   | 0.0684      | 35.63557     | 7.92784      | 0.9738  |
| 3      | 7.936         | BB   | 0.0657      | 3572.46753   | 837.79974    | 97.6231 |
| 4      | 16.874        | BV   | 0.0369      | 8.91385      | 3.86035      | 0.2436  |

Totals : 3659.44725 852.71890

\*\*\* End of Report \*\*\*

Sample Name: LC0524

**Compound 16b**

```
=====
Acq. Operator   : SYSTEM                      Seq. Line :   23
Acq. Instrument : CDD                        Location  :   P1-C-05
Injection Date  : 4/15/2016 11:19:51 PM      Inj       :    1
                                           Inj Volume: 10.000 µl
Method          : C:\Chem32\1\Data\Sir2 Purity test MeCN_rui 2016-04-15 16-44-07\Sir2 purity_
                  30-100%MeCN.M (Sequence Method)
Last changed    : 4/15/2016 4:44:07 PM by SYSTEM
Method Info     : test
=====
```

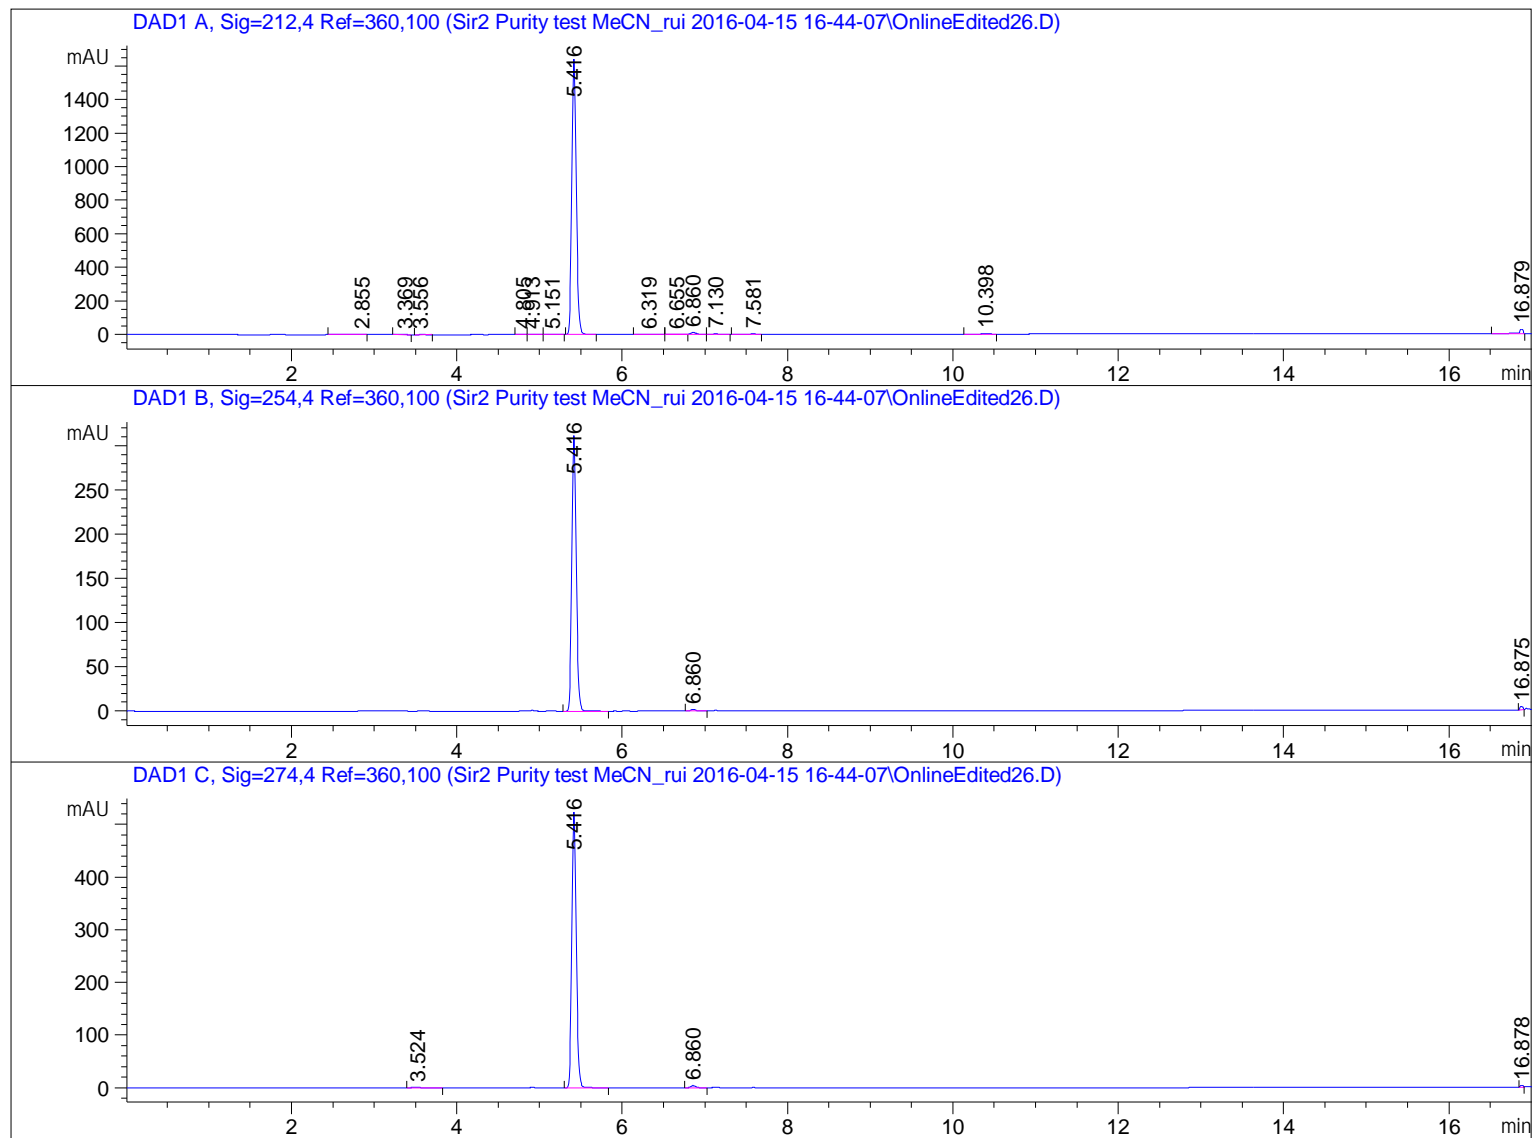

=====  
Area Percent Report  
=====

```
Sorted By      :      Signal
Multiplier     :      1.0000
Dilution       :      1.0000
Use Multiplier & Dilution Factor with ISTDs
```

Signal 1: DAD1 A, Sig=212,4 Ref=360,100

| Peak # | RetTime [min] | Type | Width [min] | Area [mAU*s] | Height [mAU] | Area %  |
|--------|---------------|------|-------------|--------------|--------------|---------|
| 1      | 2.855         | BV   | 0.1355      | 13.95104     | 1.36222      | 0.2133  |
| 2      | 3.369         | BB   | 0.0876      | 13.23471     | 2.09846      | 0.2024  |
| 3      | 3.556         | BB   | 0.0840      | 8.64549      | 1.44134      | 0.1322  |
| 4      | 4.805         | BV   | 0.0621      | 5.26367      | 1.33143      | 0.0805  |
| 5      | 4.913         | VB   | 0.0646      | 12.91914     | 2.97798      | 0.1976  |
| 6      | 5.151         | BB   | 0.0692      | 12.56777     | 2.75616      | 0.1922  |
| 7      | 5.416         | BB   | 0.0603      | 6271.46436   | 1651.32056   | 95.8999 |
| 8      | 6.319         | BV R | 0.0843      | 12.04557     | 2.05665      | 0.1842  |
| 9      | 6.655         | BV E | 0.0936      | 10.35916     | 1.59962      | 0.1584  |
| 10     | 6.860         | VV R | 0.0688      | 49.76157     | 11.00259     | 0.7609  |
| 11     | 7.130         | VB   | 0.0747      | 11.58895     | 2.30435      | 0.1772  |
| 12     | 7.581         | BB   | 0.0862      | 10.22757     | 1.80265      | 0.1564  |
| 13     | 10.398        | BB   | 0.0749      | 6.70023      | 1.37479      | 0.1025  |
| 14     | 16.879        | BB   | 0.0532      | 100.86498    | 28.54153     | 1.5424  |

Totals : 6539.59422 1711.97033

Signal 2: DAD1 B, Sig=254,4 Ref=360,100

| Peak # | RetTime [min] | Type | Width [min] | Area [mAU*s] | Height [mAU] | Area %  |
|--------|---------------|------|-------------|--------------|--------------|---------|
| 1      | 5.416         | BB   | 0.0600      | 1183.16003   | 313.51331    | 98.5178 |
| 2      | 6.860         | BB   | 0.0653      | 8.74658      | 2.07185      | 0.7283  |
| 3      | 16.875        | BV   | 0.0380      | 9.05458      | 4.07071      | 0.7539  |

Totals : 1200.96119 319.65586

Signal 3: DAD1 C, Sig=274,4 Ref=360,100

| Peak # | RetTime [min] | Type | Width [min] | Area [mAU*s] | Height [mAU] | Area %  |
|--------|---------------|------|-------------|--------------|--------------|---------|
| 1      | 3.524         | BB   | 0.1067      | 7.60098      | 1.02254      | 0.3763  |
| 2      | 5.416         | BB   | 0.0600      | 1986.40198   | 526.51404    | 98.3331 |
| 3      | 6.860         | BB   | 0.0651      | 17.04157     | 4.04902      | 0.8436  |
| 4      | 16.878        | BV   | 0.0404      | 9.02906      | 3.70552      | 0.4470  |

Totals : 2020.07358 535.29111

=====  
\*\*\* End of Report \*\*\*

Sample Name: LC0480

## Compound 17

```
=====
Acq. Operator   : SYSTEM                      Seq. Line :   25
Acq. Instrument : CDD                        Location  : P1-C-07
Injection Date  : 4/15/2016 11:55:45 PM      Inj       :    1
                                           Inj Volume: 10.000 µl
Method          : C:\Chem32\1\Data\Sir2 Purity test MeCN_rui 2016-04-15 16-44-07\Sir2 purity_
                  30-100%MeCN.M (Sequence Method)
Last changed    : 4/15/2016 4:44:07 PM by SYSTEM
Method Info     : test
=====
```

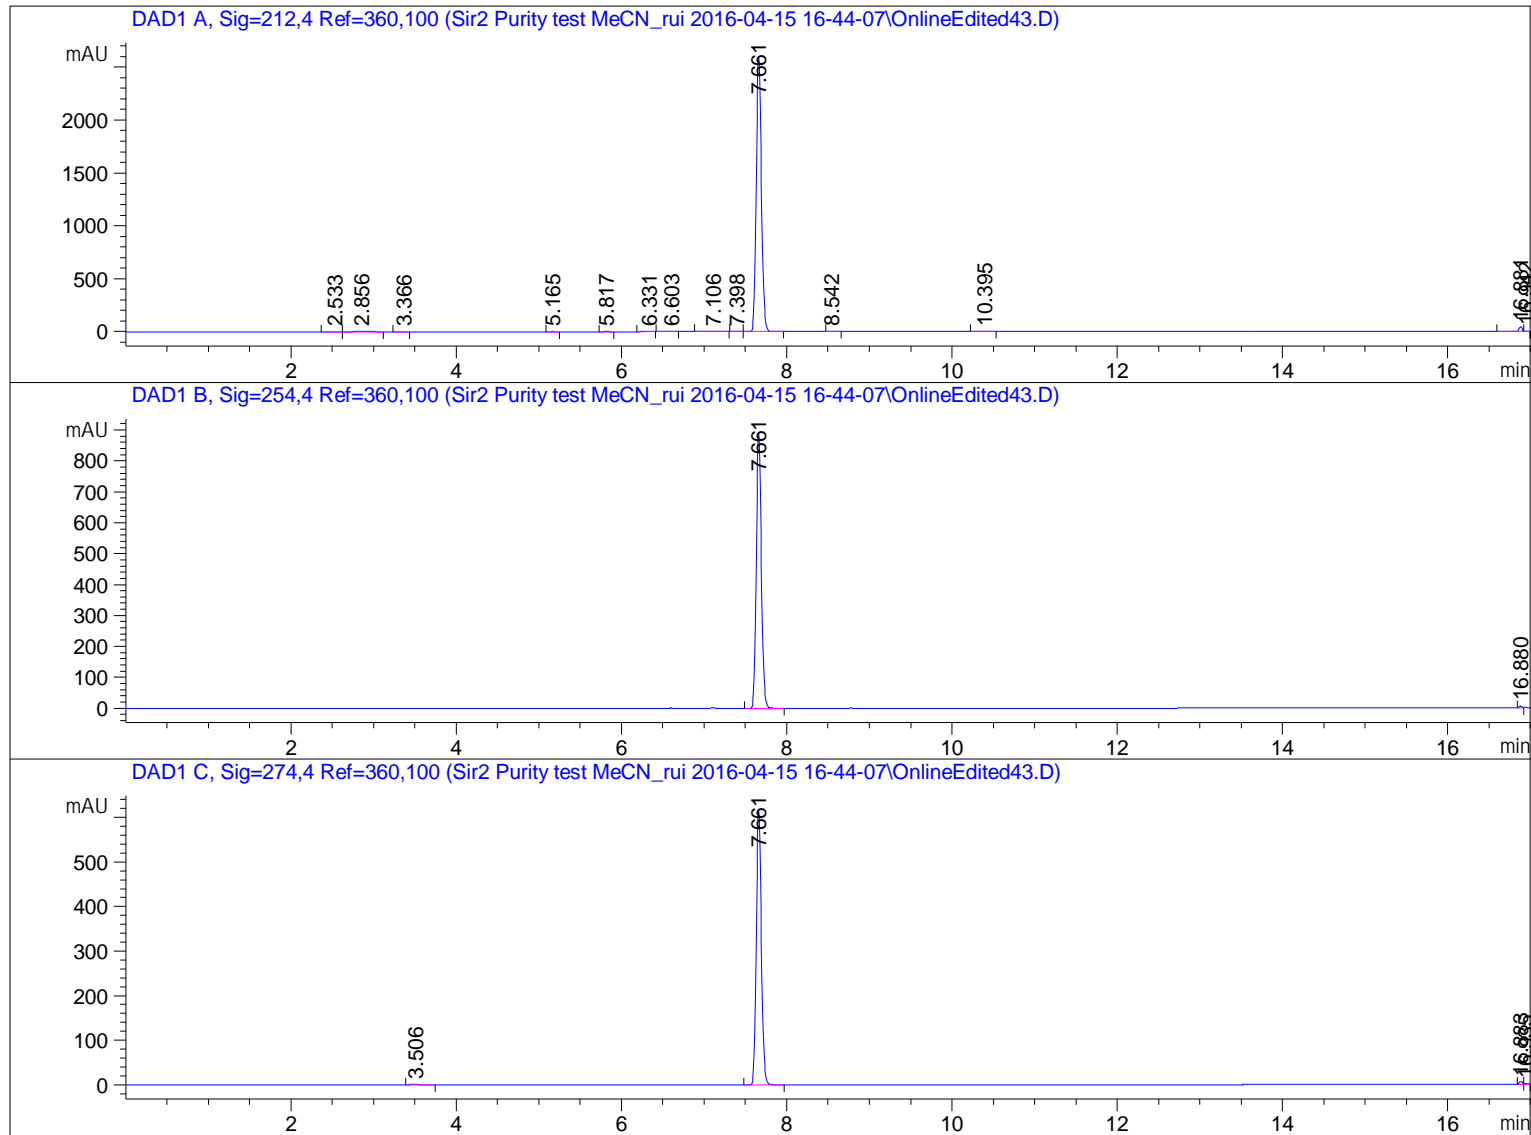

```
=====
Area Percent Report
=====
```

```
Sorted By      :      Signal
Multiplier     :      1.0000
Dilution       :      1.0000
Use Multiplier & Dilution Factor with ISTDs
```

Signal 1: DAD1 A, Sig=212,4 Ref=360,100

| Peak # | RetTime [min] | Type | Width [min] | Area [mAU*s] | Height [mAU] | Area %  |
|--------|---------------|------|-------------|--------------|--------------|---------|
| 1      | 2.533         | BB   | 0.1374      | 10.82505     | 1.17542      | 0.0944  |
| 2      | 2.856         | BB   | 0.1674      | 31.36349     | 2.44848      | 0.2735  |
| 3      | 3.366         | BB   | 0.0810      | 9.74245      | 1.69582      | 0.0849  |
| 4      | 5.165         | BB   | 0.0605      | 5.25805      | 1.37989      | 0.0458  |
| 5      | 5.817         | BB   | 0.0614      | 6.62249      | 1.70313      | 0.0577  |
| 6      | 6.331         | BB   | 0.0750      | 15.37029     | 2.94093      | 0.1340  |
| 7      | 6.603         | BB   | 0.0735      | 5.56755      | 1.17103      | 0.0485  |
| 8      | 7.106         | BB   | 0.1549      | 13.94558     | 1.36786      | 0.1216  |
| 9      | 7.398         | BV   | 0.0664      | 5.39589      | 1.24896      | 0.0470  |
| 10     | 7.661         | VB   | 0.0683      | 1.12362e4    | 2604.29736   | 97.9673 |
| 11     | 8.542         | VV   | 0.0703      | 5.03728      | 1.08239      | 0.0439  |
| 12     | 10.395        | BB   | 0.0781      | 7.30391      | 1.41779      | 0.0637  |
| 13     | 16.881        | BV R | 0.0443      | 110.94479    | 40.02087     | 0.9673  |
| 14     | 16.942        | VBAE | 0.0394      | 5.76435      | 2.28741      | 0.0503  |

Totals : 1.14693e4 2664.23733

Signal 2: DAD1 B, Sig=254,4 Ref=360,100

| Peak # | RetTime [min] | Type | Width [min] | Area [mAU*s] | Height [mAU] | Area %  |
|--------|---------------|------|-------------|--------------|--------------|---------|
| 1      | 7.661         | BB   | 0.0652      | 3763.15649   | 891.51782    | 99.6372 |
| 2      | 16.880        | BV   | 0.0406      | 13.70383     | 5.58914      | 0.3628  |

Totals : 3776.86033 897.10696

Signal 3: DAD1 C, Sig=274,4 Ref=360,100

| Peak # | RetTime [min] | Type | Width [min] | Area [mAU*s] | Height [mAU] | Area %  |
|--------|---------------|------|-------------|--------------|--------------|---------|
| 1      | 3.506         | BB   | 0.1018      | 8.71410      | 1.30743      | 0.3299  |
| 2      | 7.661         | BB   | 0.0652      | 2611.00195   | 618.83527    | 98.8456 |
| 3      | 16.883        | BV   | 0.0419      | 16.25802     | 6.34089      | 0.6155  |
| 4      | 16.935        | VBA  | 0.0420      | 5.52143      | 1.89621      | 0.2090  |

Totals : 2641.49550 628.37979

=====  
\*\*\* End of Report \*\*\*



Sample Name: LC0478

**Compound 18**

```
=====
Acq. Operator   : SYSTEM                      Seq. Line :   29
Acq. Instrument : CDD                        Location  :   Pl-D-02
Injection Date  : 4/16/2016 1:07:30 AM        Inj       :    1
                                           Inj Volume: 10.000 µl
Method          : C:\Chem32\1\Data\Sir2 Purity test MeCN_rui 2016-04-15 16-44-07\Sir2 purity_
                  30-100%MeCN.M (Sequence Method)
Last changed    : 4/15/2016 4:44:07 PM by SYSTEM
Method Info     : test
=====
```

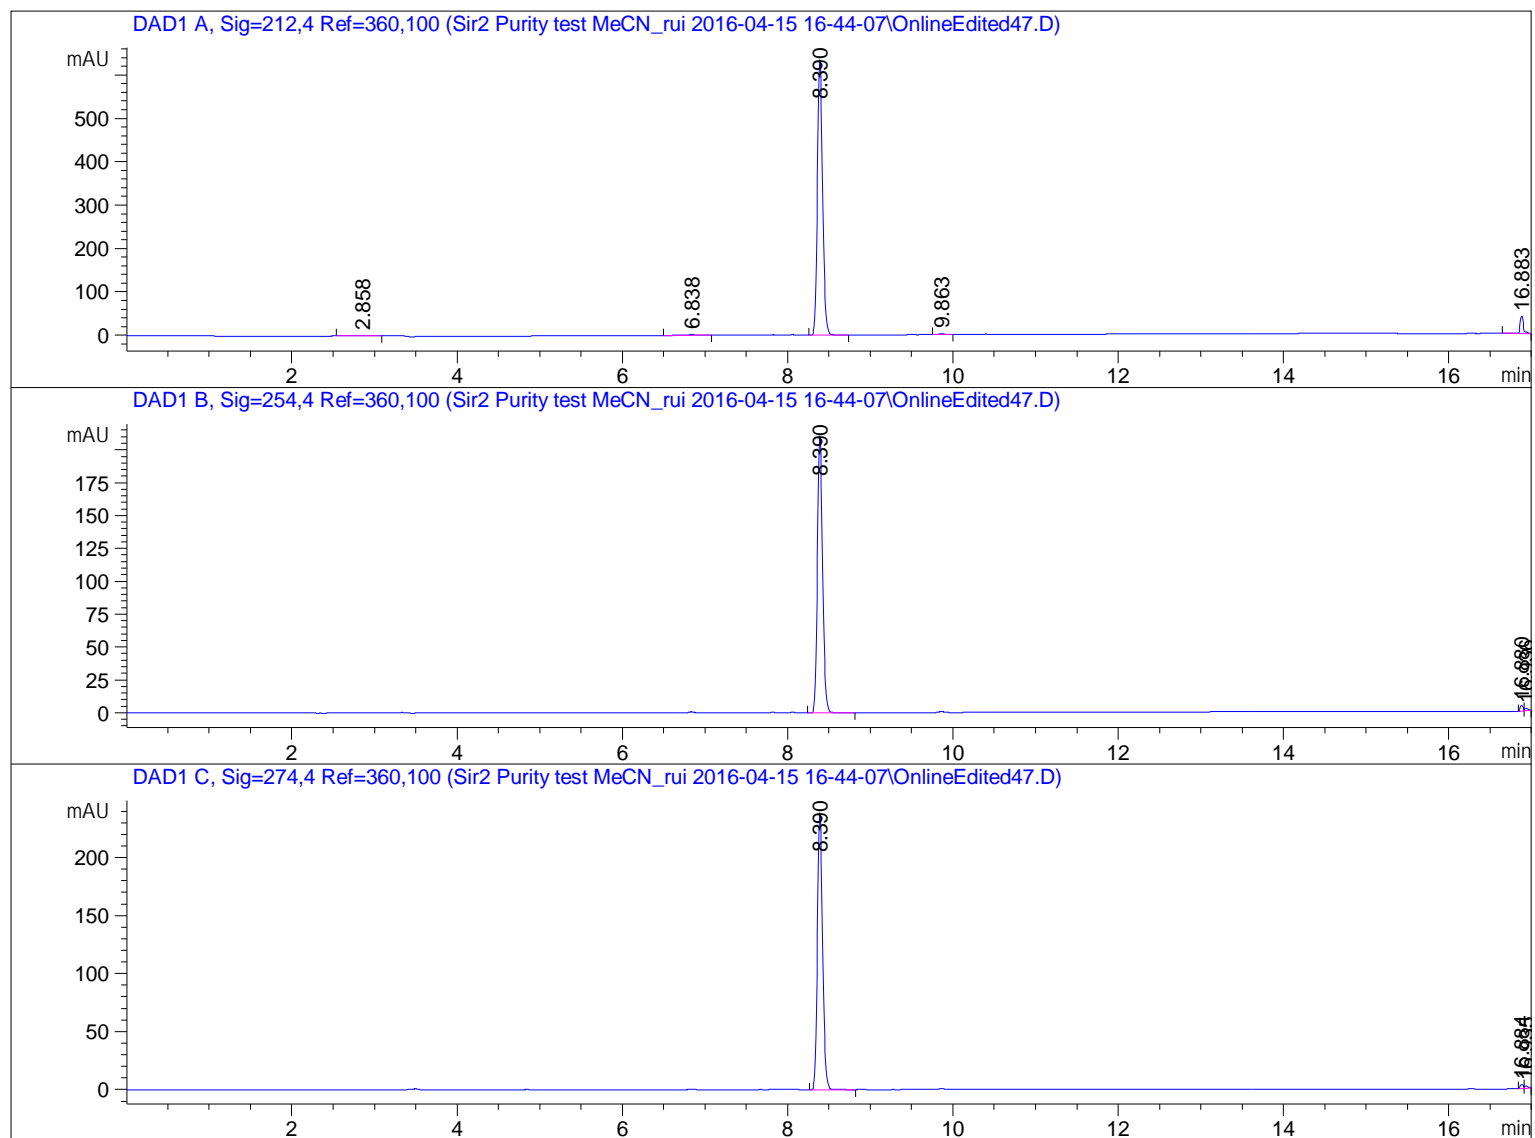

=====  
Area Percent Report  
=====

```
Sorted By      :      Signal
Multiplier     :      1.0000
Dilution       :      1.0000
Use Multiplier & Dilution Factor with ISTDs
```

Signal 1: DAD1 A, Sig=212,4 Ref=360,100

| Peak # | RetTime [min] | Type | Width [min] | Area [mAU*s] | Height [mAU] | Area %  |
|--------|---------------|------|-------------|--------------|--------------|---------|
| 1      | 2.858         | BB   | 0.1603      | 13.84749     | 1.13495      | 0.4714  |
| 2      | 6.838         | BB   | 0.1042      | 16.57284     | 2.19201      | 0.5642  |
| 3      | 8.390         | BB   | 0.0671      | 2779.38135   | 633.97571    | 94.6166 |
| 4      | 9.863         | BB   | 0.0746      | 11.82981     | 2.43675      | 0.4027  |
| 5      | 16.883        | BV R | 0.0459      | 115.88936    | 39.82915     | 3.9451  |

Totals : 2937.52084 679.56856

Signal 2: DAD1 B, Sig=254,4 Ref=360,100

| Peak # | RetTime [min] | Type | Width [min] | Area [mAU*s] | Height [mAU] | Area %  |
|--------|---------------|------|-------------|--------------|--------------|---------|
| 1      | 8.390         | BB   | 0.0671      | 920.82233    | 210.15198    | 98.3385 |
| 2      | 16.880        | BV   | 0.0415      | 10.31760     | 4.08629      | 1.1019  |
| 3      | 16.936        | VBA  | 0.0412      | 5.24007      | 1.84270      | 0.5596  |

Totals : 936.38000 216.08097

Signal 3: DAD1 C, Sig=274,4 Ref=360,100

| Peak # | RetTime [min] | Type | Width [min] | Area [mAU*s] | Height [mAU] | Area %  |
|--------|---------------|------|-------------|--------------|--------------|---------|
| 1      | 8.390         | BB   | 0.0671      | 1044.88550   | 238.48172    | 98.6094 |
| 2      | 16.884        | BV   | 0.0426      | 9.10065      | 3.47359      | 0.8589  |
| 3      | 16.935        | VBA  | 0.0418      | 5.63447      | 1.94589      | 0.5317  |

Totals : 1059.62063 243.90120

=====  
\*\*\* End of Report \*\*\*

Sample Name: LC0533

**Compound 19a**

```
=====
Acq. Operator   : SYSTEM                      Seq. Line :   33
Acq. Instrument : CDD                        Location  :   P1-D-06
Injection Date  : 4/16/2016 2:19:14 AM        Inj       :    1
                                           Inj Volume: 10.000 µl
Method          : C:\Chem32\1\Data\Sir2 Purity test MeCN_rui 2016-04-15 16-44-07\Sir2 purity_
                  30-100%MeCN.M (Sequence Method)
Last changed    : 4/15/2016 4:44:07 PM by SYSTEM
Method Info     : test
=====
```

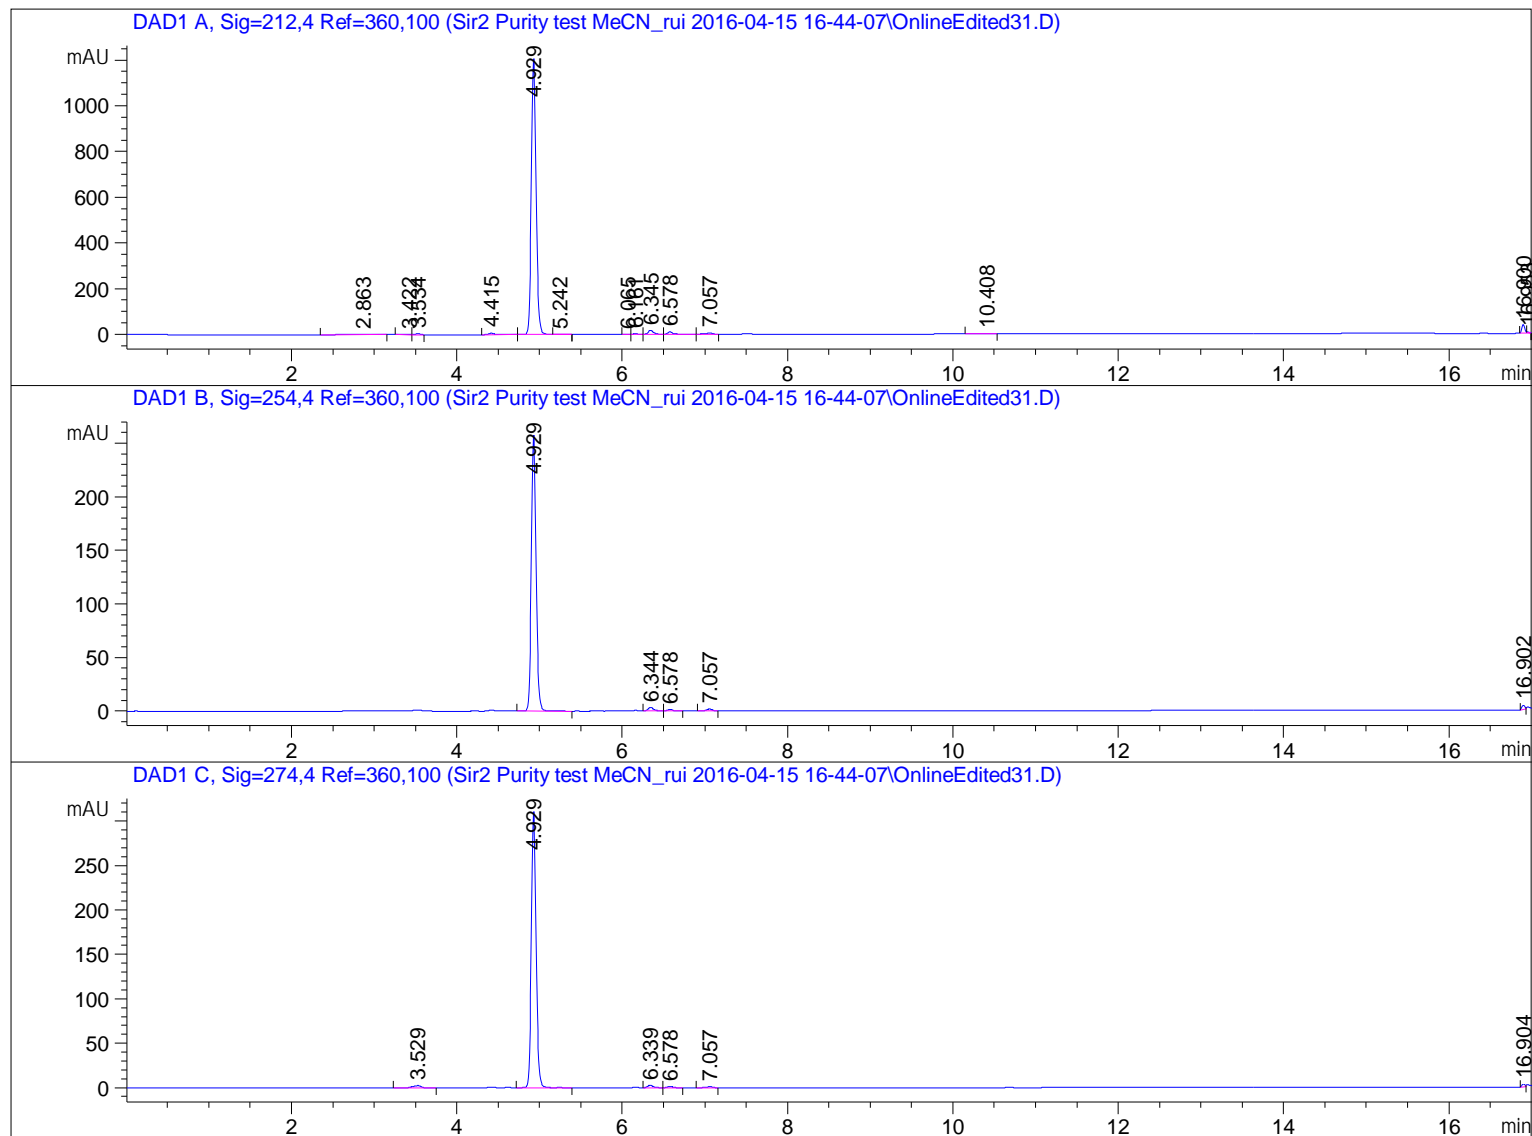

=====  
Area Percent Report  
=====

```
Sorted By      :      Signal
Multiplier     :      1.0000
Dilution       :      1.0000
Use Multiplier & Dilution Factor with ISTDs
```

Signal 1: DAD1 A, Sig=212,4 Ref=360,100

| Peak # | RetTime [min] | Type | Width [min] | Area [mAU*s] | Height [mAU] | Area %  |
|--------|---------------|------|-------------|--------------|--------------|---------|
| 1      | 2.863         | BB   | 0.3242      | 53.02539     | 2.07443      | 1.0007  |
| 2      | 3.422         | BV   | 0.0840      | 7.12159      | 1.18677      | 0.1344  |
| 3      | 3.534         | VB   | 0.0712      | 19.54276     | 4.12819      | 0.3688  |
| 4      | 4.415         | BV R | 0.0859      | 38.51936     | 6.42624      | 0.7269  |
| 5      | 4.929         | VV R | 0.0629      | 4885.66162   | 1215.51758   | 92.2014 |
| 6      | 5.242         | VB E | 0.0693      | 6.95860      | 1.52308      | 0.1313  |
| 7      | 6.065         | VV   | 0.0575      | 5.04428      | 1.35359      | 0.0952  |
| 8      | 6.161         | VB   | 0.0643      | 10.59871     | 2.55853      | 0.2000  |
| 9      | 6.345         | BB   | 0.0698      | 78.24517     | 16.98199     | 1.4766  |
| 10     | 6.578         | BV R | 0.0737      | 50.41822     | 10.19941     | 0.9515  |
| 11     | 7.057         | VB   | 0.0795      | 29.23104     | 5.37130      | 0.5516  |
| 12     | 10.408        | BB   | 0.0746      | 6.84824      | 1.41264      | 0.1292  |
| 13     | 16.900        | BV R | 0.0430      | 102.31124    | 38.50151     | 1.9308  |
| 14     | 16.953        | VBAE | 0.0351      | 5.37804      | 2.50199      | 0.1015  |

Totals : 5298.90427 1309.73725

Signal 2: DAD1 B, Sig=254,4 Ref=360,100

| Peak # | RetTime [min] | Type | Width [min] | Area [mAU*s] | Height [mAU] | Area %  |
|--------|---------------|------|-------------|--------------|--------------|---------|
| 1      | 4.929         | BV R | 0.0627      | 1038.17200   | 259.26132    | 96.2048 |
| 2      | 6.344         | BV   | 0.0714      | 15.70346     | 3.30841      | 1.4552  |
| 3      | 6.578         | VB   | 0.0658      | 6.62663      | 1.55214      | 0.6141  |
| 4      | 7.057         | BB   | 0.0717      | 8.63590      | 1.80742      | 0.8003  |
| 5      | 16.902        | BV   | 0.0420      | 9.98896      | 3.88999      | 0.9257  |

Totals : 1079.12694 269.81928

Signal 3: DAD1 C, Sig=274,4 Ref=360,100

| Peak # | RetTime [min] | Type | Width [min] | Area [mAU*s] | Height [mAU] | Area %  |
|--------|---------------|------|-------------|--------------|--------------|---------|
| 1      | 3.529         | BB   | 0.1041      | 16.93034     | 2.46611      | 1.3016  |
| 2      | 4.929         | BV R | 0.0627      | 1251.75537   | 312.48953    | 96.2378 |
| 3      | 6.339         | BV   | 0.0706      | 12.35552     | 2.73845      | 0.9499  |
| 4      | 6.578         | VB   | 0.0647      | 6.27346      | 1.50189      | 0.4823  |
| 5      | 7.057         | BB   | 0.0736      | 5.58472      | 1.13167      | 0.4294  |
| 6      | 16.904        | BV   | 0.0426      | 7.79049      | 2.97347      | 0.5990  |

Totals : 1300.68990 323.30113

=====  
\*\*\* End of Report \*\*\*

Sample Name: LC0540

**Compound 19b**

```
=====
Acq. Operator   : SYSTEM                      Seq. Line :   34
Acq. Instrument : CDD                        Location  :   Pl-D-07
Injection Date  : 4/16/2016 2:37:12 AM        Inj       :    1
                                           Inj Volume: 10.000 µl
Method         : C:\Chem32\1\Data\Sir2 Purity test MeCN_rui 2016-04-15 16-44-07\Sir2 purity_
                30-100%MeCN.M (Sequence Method)
Last changed    : 4/15/2016 4:44:07 PM by SYSTEM
Method Info     : test
=====
```

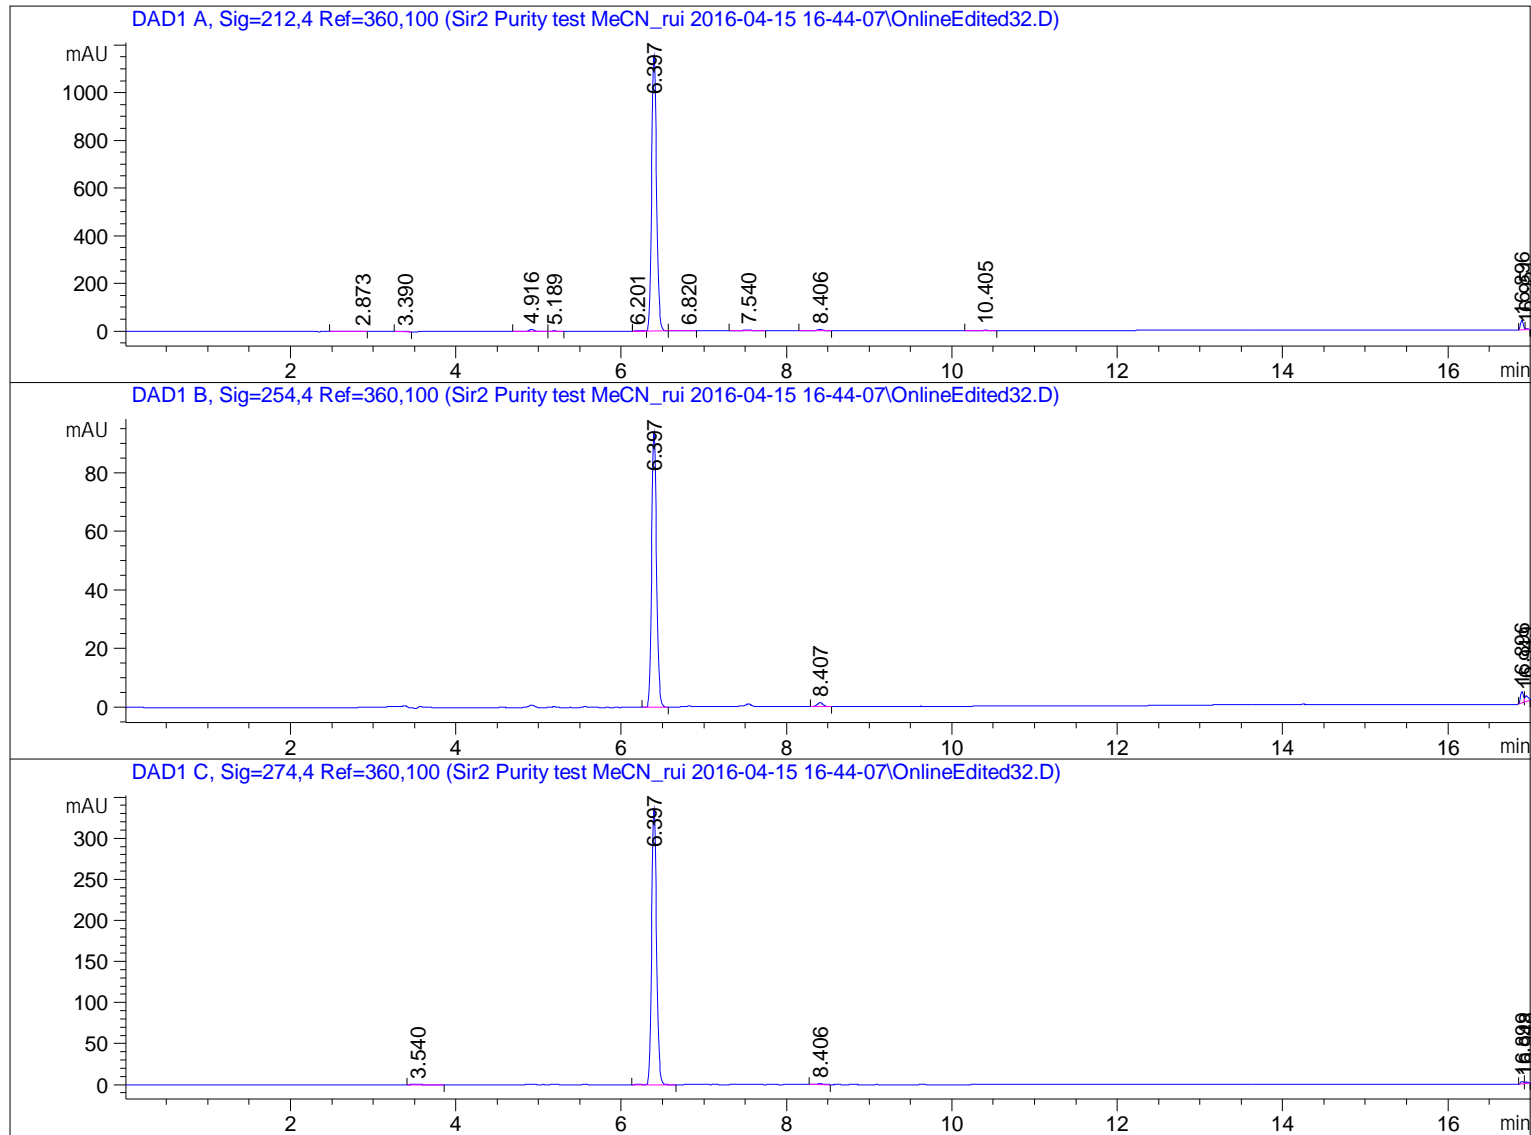

=====  
Area Percent Report  
=====

```
Sorted By      :      Signal
Multiplier     :      1.0000
Dilution       :      1.0000
Use Multiplier & Dilution Factor with ISTDs
```

Signal 1: DAD1 A, Sig=212,4 Ref=360,100

| Peak # | RetTime [min] | Type | Width [min] | Area [mAU*s] | Height [mAU] | Area %  |
|--------|---------------|------|-------------|--------------|--------------|---------|
| 1      | 2.873         | BV   | 0.1379      | 14.12148     | 1.37437      | 0.2843  |
| 2      | 3.390         | BB   | 0.0870      | 13.01250     | 2.13705      | 0.2620  |
| 3      | 4.916         | BV R | 0.0723      | 36.58270     | 7.58489      | 0.7366  |
| 4      | 5.189         | VB   | 0.0668      | 7.87881      | 1.80839      | 0.1586  |
| 5      | 6.201         | BV E | 0.0624      | 8.82808      | 2.13006      | 0.1777  |
| 6      | 6.397         | VB R | 0.0635      | 4702.12256   | 1155.73206   | 94.6727 |
| 7      | 6.820         | BV   | 0.1031      | 11.27499     | 1.66391      | 0.2270  |
| 8      | 7.540         | VV R | 0.1107      | 29.21206     | 3.59896      | 0.5882  |
| 9      | 8.406         | BB   | 0.0778      | 25.77858     | 5.02815      | 0.5190  |
| 10     | 10.405        | BB   | 0.0757      | 6.81076      | 1.37705      | 0.1371  |
| 11     | 16.896        | BV R | 0.0416      | 101.61607    | 40.05394     | 2.0459  |
| 12     | 16.951        | VBAE | 0.0377      | 9.47649      | 3.98946      | 0.1908  |

Totals : 4966.71510 1226.47829

Signal 2: DAD1 B, Sig=254,4 Ref=360,100

| Peak # | RetTime [min] | Type | Width [min] | Area [mAU*s] | Height [mAU] | Area %  |
|--------|---------------|------|-------------|--------------|--------------|---------|
| 1      | 6.397         | BB   | 0.0632      | 380.62216    | 94.03521     | 94.7648 |
| 2      | 8.407         | BB   | 0.0732      | 6.19297      | 1.30965      | 1.5419  |
| 3      | 16.896        | BV   | 0.0418      | 9.75478      | 3.81336      | 2.4287  |
| 4      | 16.949        | VBA  | 0.0410      | 5.07924      | 1.91417      | 1.2646  |

Totals : 401.64915 101.07239

Signal 3: DAD1 C, Sig=274,4 Ref=360,100

| Peak # | RetTime [min] | Type | Width [min] | Area [mAU*s] | Height [mAU] | Area %  |
|--------|---------------|------|-------------|--------------|--------------|---------|
| 1      | 3.540         | BB   | 0.1247      | 7.50122      | 1.00989      | 0.5389  |
| 2      | 6.397         | VB R | 0.0634      | 1366.12732   | 336.39005    | 98.1536 |
| 3      | 8.406         | BB   | 0.0743      | 5.71022      | 1.18403      | 0.4103  |
| 4      | 16.899        | BV   | 0.0428      | 7.44843      | 2.82314      | 0.5352  |
| 5      | 16.948        | VBA  | 0.0418      | 5.03917      | 1.85060      | 0.3621  |

Totals : 1391.82636 343.25771

=====  
\*\*\* End of Report \*\*\*

Sample Name: LC0535

**Compound 19c**

=====

|                 |                                                                                                              |            |             |
|-----------------|--------------------------------------------------------------------------------------------------------------|------------|-------------|
| Acq. Operator   | : SYSTEM                                                                                                     | Seq. Line  | : 4         |
| Acq. Instrument | : CDD                                                                                                        | Location   | : P1-F-04   |
| Injection Date  | : 4/18/2016 9:20:44 PM                                                                                       | Inj        | : 1         |
|                 |                                                                                                              | Inj Volume | : 10.000 µl |
| Method          | : C:\Chem32\1\Data\Sir2 Purity test MeCN_rui 2016-04-18 20-25-03\Sir2 purity_30-100%MeCN.M (Sequence Method) |            |             |
| Last changed    | : 4/18/2016 8:25:03 PM by SYSTEM                                                                             |            |             |
| Method Info     | : test                                                                                                       |            |             |

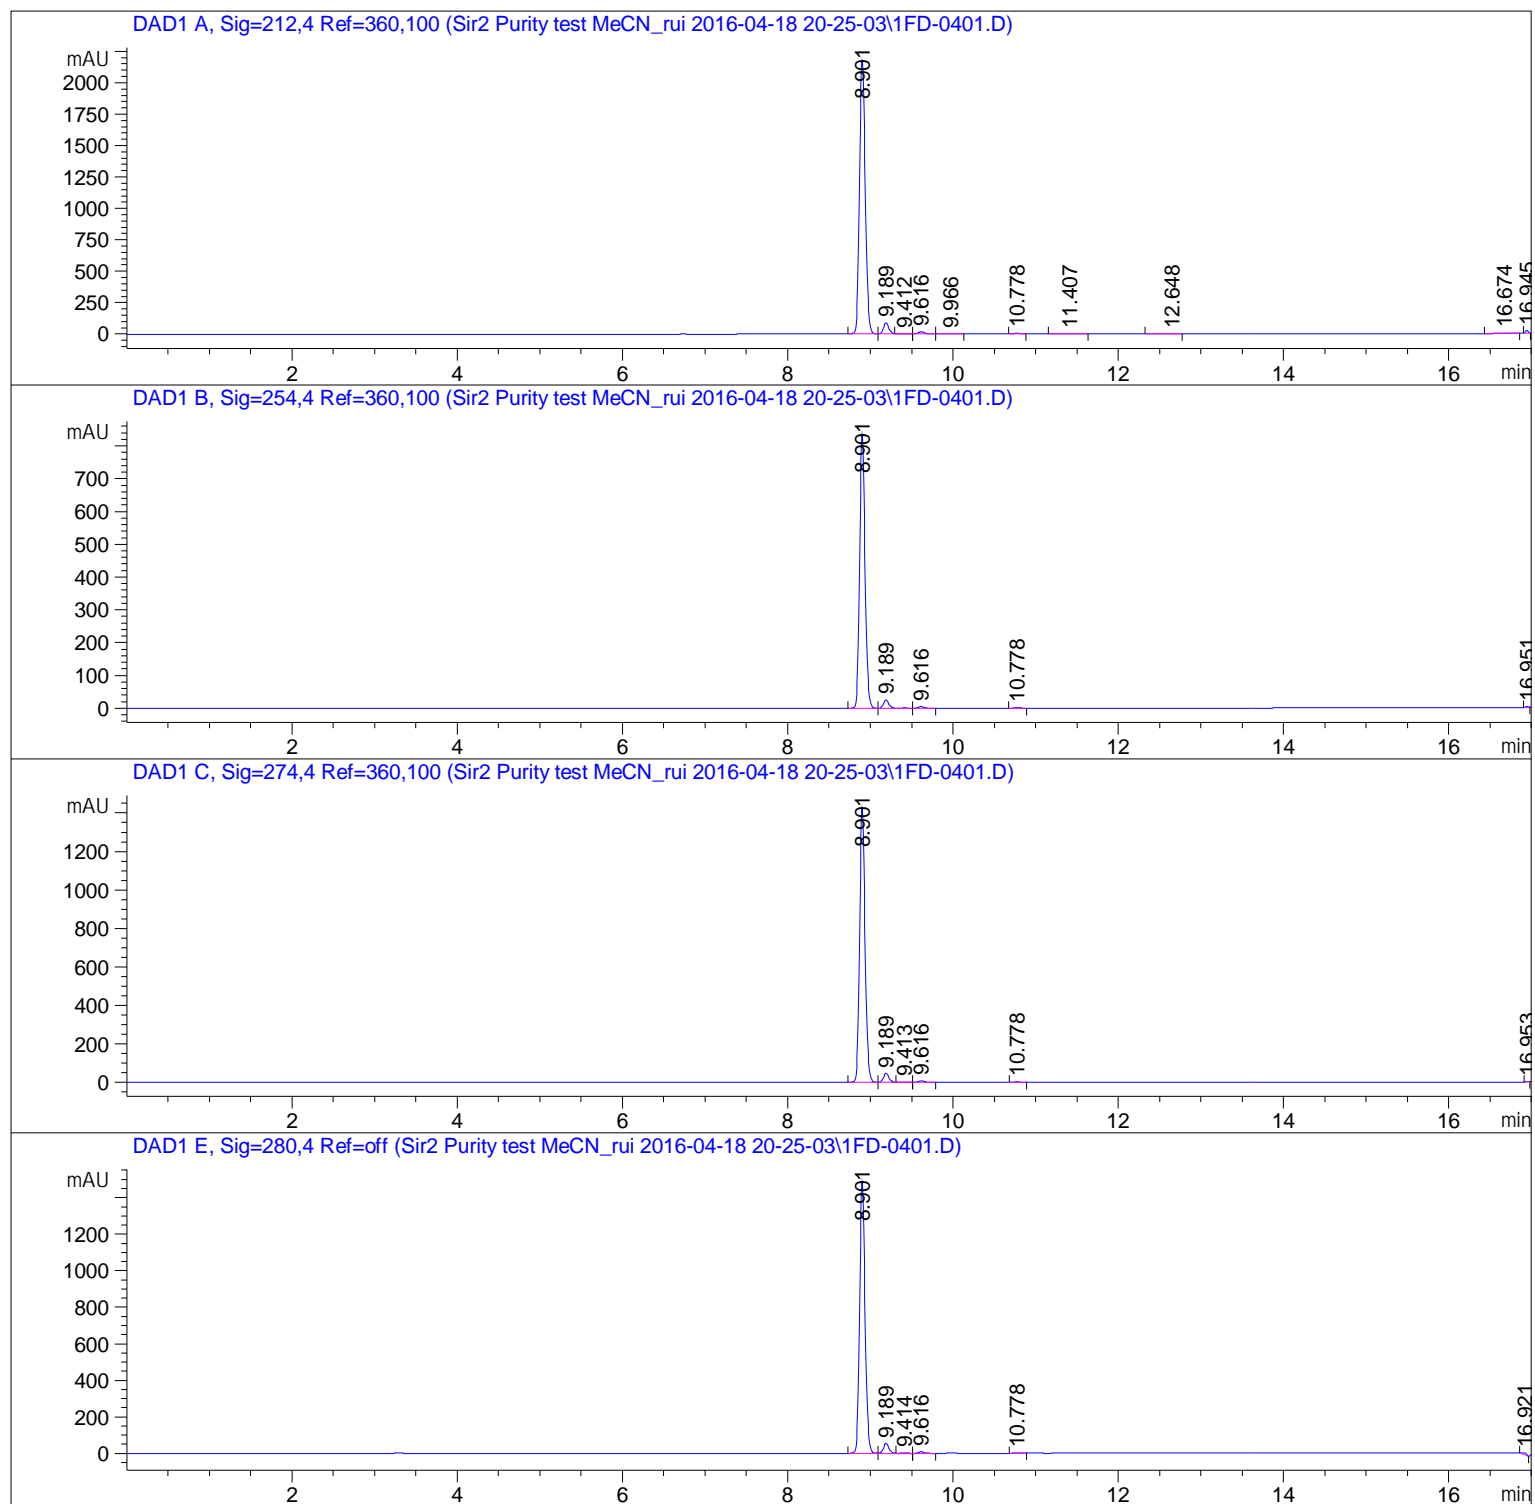

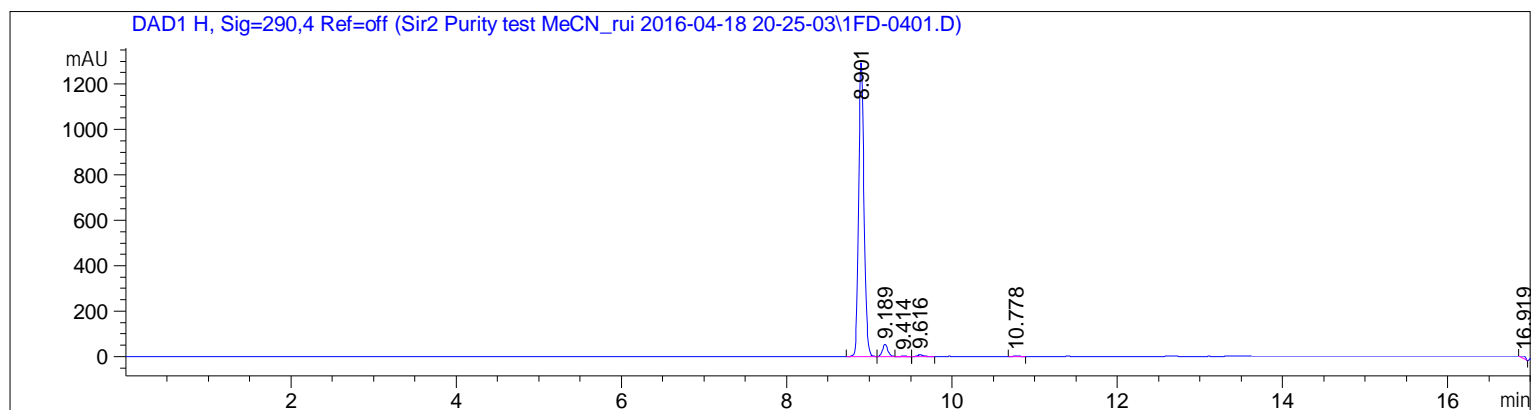

Area Percent Report

Sorted By : Signal  
Multiplier : 1.0000  
Dilution : 1.0000  
Use Multiplier & Dilution Factor with ISTDs

Signal 1: DAD1 A, Sig=212,4 Ref=360,100

| Peak # | RetTime [min] | Type | Width [min] | Area [mAU*s] | Height [mAU] | Area %  |
|--------|---------------|------|-------------|--------------|--------------|---------|
| 1      | 8.901         | BV   | 0.0770      | 1.06217e4    | 2173.48511   | 94.2936 |
| 2      | 9.189         | VV R | 0.0718      | 406.39020    | 88.16858     | 3.6077  |
| 3      | 9.412         | VB E | 0.0741      | 16.09970     | 3.34966      | 0.1429  |
| 4      | 9.616         | BB   | 0.0735      | 84.63209     | 17.78101     | 0.7513  |
| 5      | 9.966         | BB   | 0.0990      | 10.91131     | 1.57113      | 0.0969  |
| 6      | 10.778        | BB   | 0.0751      | 21.68983     | 4.59571      | 0.1926  |
| 7      | 11.407        | BB   | 0.1269      | 11.40628     | 1.24444      | 0.1013  |
| 8      | 12.648        | BB   | 0.1094      | 14.39342     | 1.83672      | 0.1278  |
| 9      | 16.674        | BB   | 0.1529      | 23.59062     | 2.20396      | 0.2094  |
| 10     | 16.945        | BBA  | 0.0398      | 53.68252     | 22.52287     | 0.4766  |

Totals : 1.12645e4 2316.75919

Signal 2: DAD1 B, Sig=254,4 Ref=360,100

| Peak # | RetTime [min] | Type | Width [min] | Area [mAU*s] | Height [mAU] | Area %  |
|--------|---------------|------|-------------|--------------|--------------|---------|
| 1      | 8.901         | BV   | 0.0712      | 3802.88037   | 833.86719    | 95.9560 |
| 2      | 9.189         | VV R | 0.0740      | 120.63305    | 25.12811     | 3.0439  |
| 3      | 9.616         | BB   | 0.0737      | 23.43620     | 4.90456      | 0.5914  |
| 4      | 10.778        | BB   | 0.0758      | 8.79339      | 1.83971      | 0.2219  |
| 5      | 16.951        | BB   | 0.0396      | 7.40627      | 3.13137      | 0.1869  |

Totals : 3963.14928 868.87094



Signal 3: DAD1 C, Sig=274,4 Ref=360,100

| Peak # | RetTime [min] | Type | Width [min] | Area [mAU*s] | Height [mAU] | Area %  |
|--------|---------------|------|-------------|--------------|--------------|---------|
| 1      | 8.901         | BV   | 0.0713      | 6504.47266   | 1422.51550   | 95.9255 |
| 2      | 9.189         | VV R | 0.0718      | 216.89243    | 47.06205     | 3.1986  |
| 3      | 9.413         | VB E | 0.0742      | 7.38368      | 1.53145      | 0.1089  |
| 4      | 9.616         | BB   | 0.0737      | 35.77792     | 7.49066      | 0.5276  |
| 5      | 10.778        | BB   | 0.0755      | 9.55797      | 2.01080      | 0.1410  |
| 6      | 16.953        | BB   | 0.0398      | 6.67313      | 2.80312      | 0.0984  |

Totals : 6780.75777 1483.41359

Signal 4: DAD1 E, Sig=280,4 Ref=off

| Peak # | RetTime [min] | Type | Width [min] | Area [mAU*s] | Height [mAU] | Area %  |
|--------|---------------|------|-------------|--------------|--------------|---------|
| 1      | 8.901         | BV   | 0.0714      | 6788.86035   | 1482.45166   | 95.2473 |
| 2      | 9.189         | VV R | 0.0717      | 246.16814    | 53.47733     | 3.4537  |
| 3      | 9.414         | VB E | 0.0742      | 7.49099      | 1.55474      | 0.1051  |
| 4      | 9.616         | BB   | 0.0737      | 37.93104     | 7.93981      | 0.5322  |
| 5      | 10.778        | BB   | 0.0756      | 9.53864      | 2.00186      | 0.1338  |
| 6      | 16.921        | BB   | 0.0565      | 37.62646     | 11.10863     | 0.5279  |

Totals : 7127.61561 1558.53403

Signal 5: DAD1 H, Sig=290,4 Ref=off

| Peak # | RetTime [min] | Type | Width [min] | Area [mAU*s] | Height [mAU] | Area %  |
|--------|---------------|------|-------------|--------------|--------------|---------|
| 1      | 8.901         | BV   | 0.0714      | 5929.82666   | 1294.46326   | 94.7530 |
| 2      | 9.189         | VV R | 0.0716      | 242.29263    | 52.69270     | 3.8716  |
| 3      | 9.414         | VB E | 0.0735      | 6.37546      | 1.33959      | 0.1019  |
| 4      | 9.616         | BB   | 0.0737      | 34.72555     | 7.26909      | 0.5549  |
| 5      | 10.778        | BB   | 0.0753      | 8.14623      | 1.71871      | 0.1302  |
| 6      | 16.919        | BB   | 0.0547      | 36.82909     | 11.21660     | 0.5885  |

Totals : 6258.19563 1368.69995

=====  
\*\*\* End of Report \*\*\*

Sample Name: LC0541

**Compound 20a**

```
=====
Acq. Operator   : SYSTEM                      Seq. Line :   36
Acq. Instrument : CDD                        Location  :   Pl-D-09
Injection Date  : 4/16/2016 3:13:05 AM        Inj       :    1
                                           Inj Volume: 10.000 µl
Method          : C:\Chem32\1\Data\Sir2 Purity test MeCN_rui 2016-04-15 16-44-07\Sir2 purity_
                  30-100%MeCN.M (Sequence Method)
Last changed    : 4/15/2016 4:44:07 PM by SYSTEM
Method Info     : test
=====
```

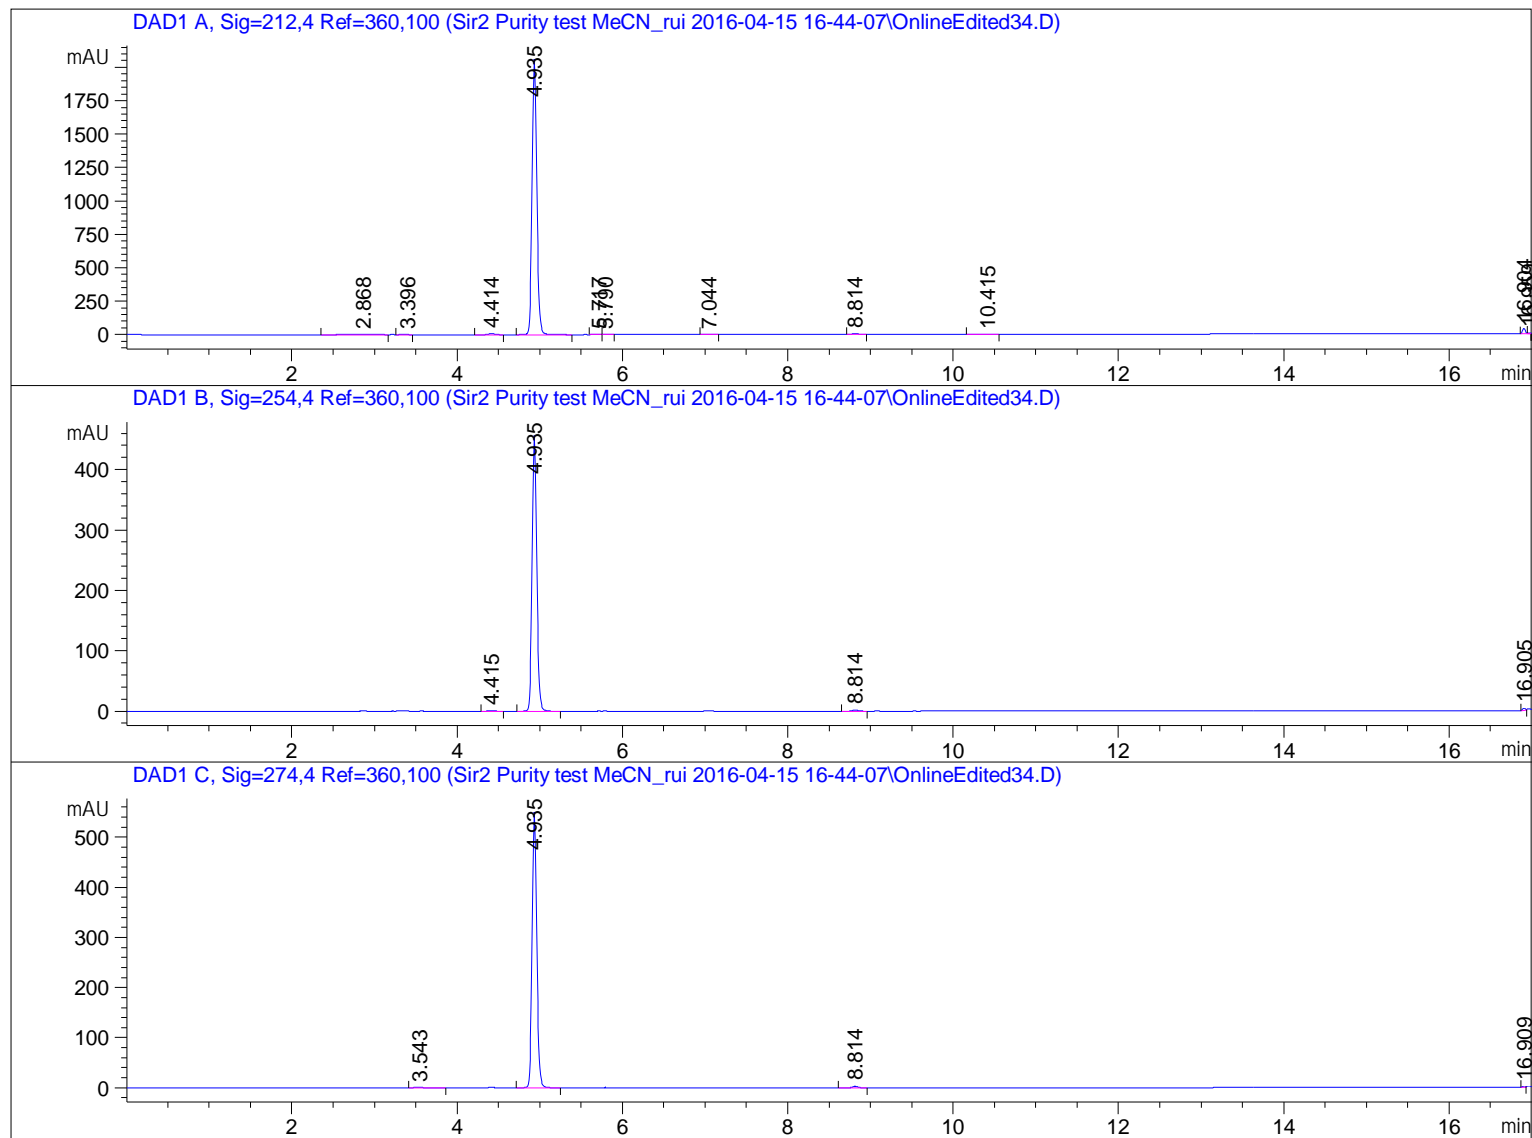

=====  
Area Percent Report  
=====

```
Sorted By      :      Signal
Multiplier     :      1.0000
Dilution       :      1.0000
Use Multiplier & Dilution Factor with ISTDs
```

Signal 1: DAD1 A, Sig=212,4 Ref=360,100

| Peak # | RetTime [min] | Type | Width [min] | Area [mAU*s] | Height [mAU] | Area %  |
|--------|---------------|------|-------------|--------------|--------------|---------|
| 1      | 2.868         | BB   | 0.3395      | 65.97676     | 2.39425      | 0.7685  |
| 2      | 3.396         | BB   | 0.0837      | 11.13997     | 1.86584      | 0.1298  |
| 3      | 4.414         | BB   | 0.0735      | 37.01006     | 7.77628      | 0.4311  |
| 4      | 4.935         | BB   | 0.0629      | 8301.71875   | 2065.33374   | 96.7016 |
| 5      | 5.717         | BV   | 0.0535      | 6.47774      | 1.82222      | 0.0755  |
| 6      | 5.790         | VV   | 0.0608      | 8.82790      | 2.11093      | 0.1028  |
| 7      | 7.044         | BB   | 0.0975      | 11.83717     | 1.98621      | 0.1379  |
| 8      | 8.814         | BB   | 0.0679      | 25.46918     | 5.72301      | 0.2967  |
| 9      | 10.415        | BB   | 0.0749      | 6.95381      | 1.42501      | 0.0810  |
| 10     | 16.904        | BV R | 0.0414      | 104.25413    | 41.33171     | 1.2144  |
| 11     | 16.959        | VBAE | 0.0321      | 5.21862      | 2.71218      | 0.0608  |

Totals : 8584.88408 2134.48137

Signal 2: DAD1 B, Sig=254,4 Ref=360,100

| Peak # | RetTime [min] | Type | Width [min] | Area [mAU*s] | Height [mAU] | Area %  |
|--------|---------------|------|-------------|--------------|--------------|---------|
| 1      | 4.415         | BB   | 0.0741      | 5.96790      | 1.24008      | 0.3256  |
| 2      | 4.935         | BB   | 0.0622      | 1809.89917   | 456.98740    | 98.7525 |
| 3      | 8.814         | BB   | 0.0682      | 8.10324      | 1.80988      | 0.4421  |
| 4      | 16.905        | BV   | 0.0418      | 8.79244      | 3.43676      | 0.4797  |

Totals : 1832.76276 463.47413

Signal 3: DAD1 C, Sig=274,4 Ref=360,100

| Peak # | RetTime [min] | Type | Width [min] | Area [mAU*s] | Height [mAU] | Area %  |
|--------|---------------|------|-------------|--------------|--------------|---------|
| 1      | 3.543         | BB   | 0.1258      | 8.93170      | 1.18716      | 0.4041  |
| 2      | 4.935         | BB   | 0.0622      | 2181.22754   | 550.86676    | 98.6808 |
| 3      | 8.814         | BB   | 0.0684      | 13.88230     | 3.09290      | 0.6280  |
| 4      | 16.909        | BV   | 0.0425      | 6.34632      | 2.42631      | 0.2871  |

Totals : 2210.38786 557.57313

=====  
\*\*\* End of Report \*\*\*

Sample Name: LC0556

**Compound 20b**

```
=====
Acq. Operator   : SYSTEM                      Seq. Line :   37
Acq. Instrument : CDD                        Location  :   Pl-E-01
Injection Date  : 4/16/2016 3:31:02 AM        Inj       :    1
                                           Inj Volume: 10.000 µl
Method         : C:\Chem32\1\Data\Sir2 Purity test MeCN_rui 2016-04-15 16-44-07\Sir2 purity_
                30-100%MeCN.M (Sequence Method)
Last changed    : 4/15/2016 4:44:07 PM by SYSTEM
Method Info     : test
=====
```

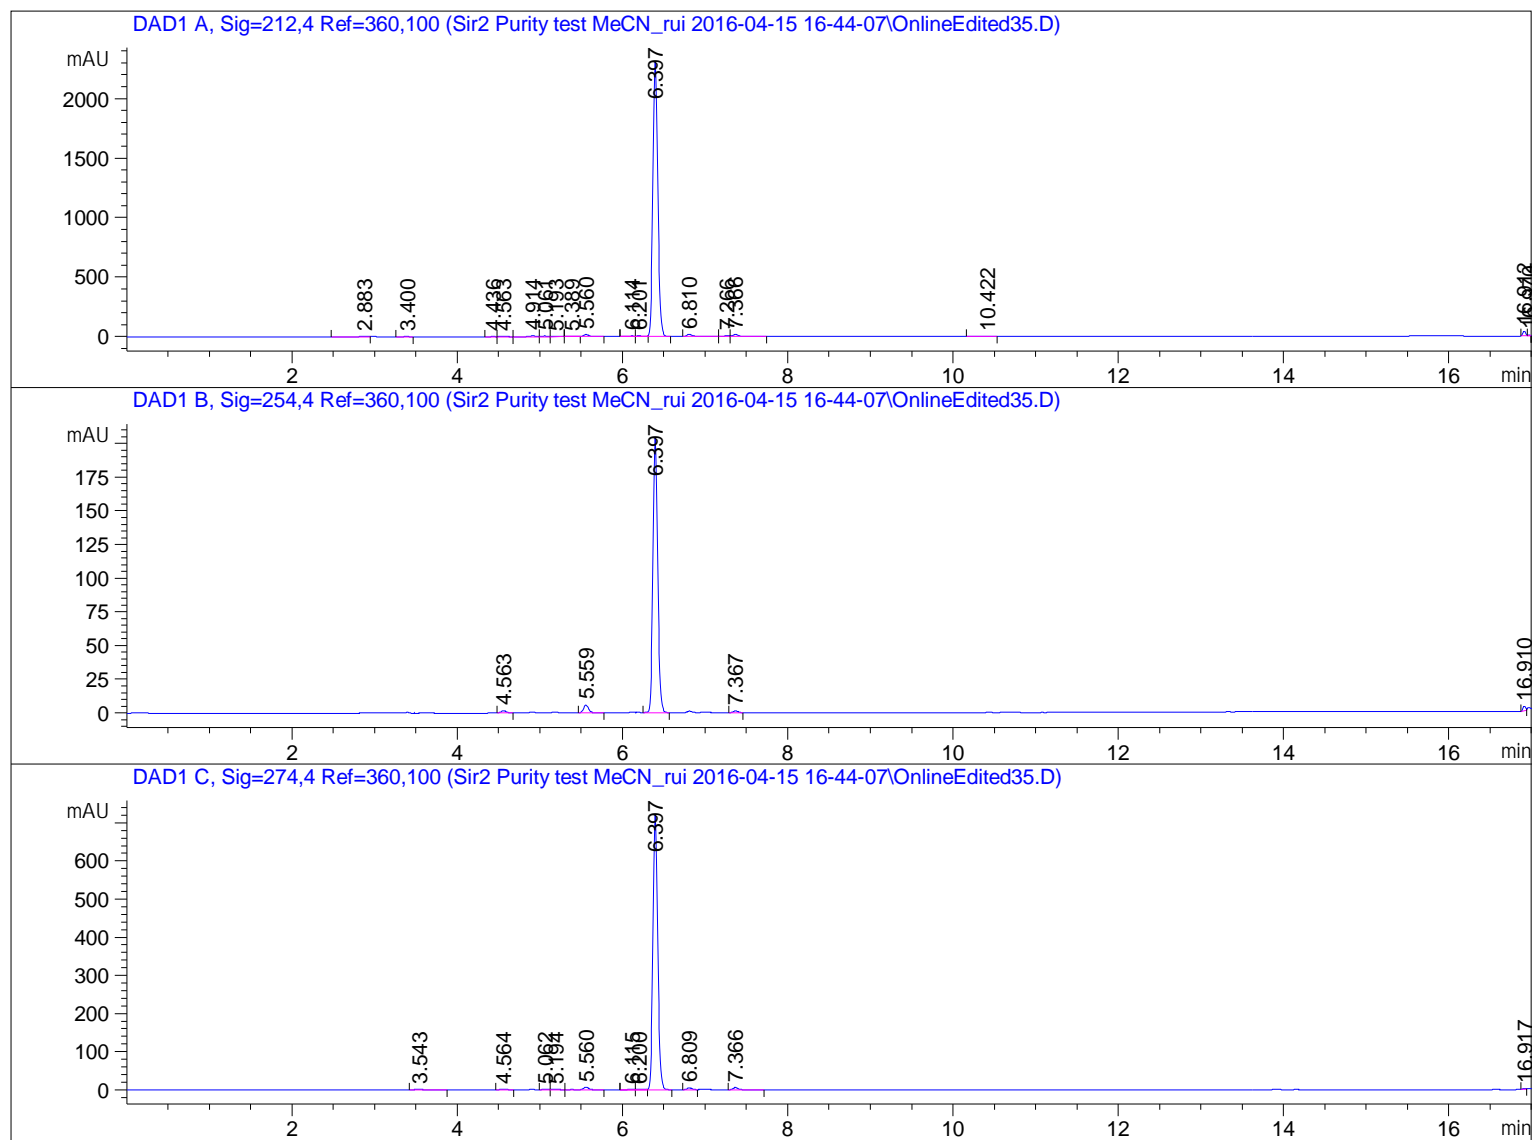

```
=====
                        Area Percent Report
=====
```

```
Sorted By       :      Signal
Multiplier      :      1.0000
Dilution        :      1.0000
Use Multiplier & Dilution Factor with ISTDs
```

Signal 1: DAD1 A, Sig=212,4 Ref=360,100

| Peak # | RetTime [min] | Type | Width [min] | Area [mAU*s] | Height [mAU] | Area %  |
|--------|---------------|------|-------------|--------------|--------------|---------|
| 1      | 2.883         | BV   | 0.1543      | 16.79104     | 1.43720      | 0.1639  |
| 2      | 3.400         | BB   | 0.0903      | 11.91254     | 1.97618      | 0.1163  |
| 3      | 4.436         | BV   | 0.0757      | 5.84956      | 1.22595      | 0.0571  |
| 4      | 4.563         | VB   | 0.0736      | 23.70037     | 4.97365      | 0.2314  |
| 5      | 4.914         | BV   | 0.0661      | 31.54052     | 7.34483      | 0.3080  |
| 6      | 5.061         | VV   | 0.0602      | 23.88740     | 6.03366      | 0.2332  |
| 7      | 5.193         | VV   | 0.0767      | 22.21590     | 4.41552      | 0.2169  |
| 8      | 5.389         | VV E | 0.0790      | 8.48833      | 1.57082      | 0.0829  |
| 9      | 5.560         | VB R | 0.0727      | 78.96269     | 16.85054     | 0.7710  |
| 10     | 6.114         | BV E | 0.0751      | 23.15332     | 4.57408      | 0.2261  |
| 11     | 6.201         | VV E | 0.0788      | 28.88398     | 5.19916      | 0.2820  |
| 12     | 6.397         | VB R | 0.0644      | 9667.82422   | 2329.07349   | 94.3974 |
| 13     | 6.810         | BV R | 0.0727      | 81.48457     | 16.77758     | 0.7956  |
| 14     | 7.266         | BV   | 0.0608      | 22.20163     | 5.53192      | 0.2168  |
| 15     | 7.366         | VB   | 0.0718      | 82.19278     | 17.19473     | 0.8025  |
| 16     | 10.422        | BB   | 0.0746      | 6.85558      | 1.41209      | 0.0669  |
| 17     | 16.912        | BV R | 0.0403      | 99.71455     | 41.16579     | 0.9736  |
| 18     | 16.970        | VBAE | 0.0318      | 5.96324      | 3.12992      | 0.0582  |

Totals : 1.02416e4 2469.88710

Signal 2: DAD1 B, Sig=254,4 Ref=360,100

| Peak # | RetTime [min] | Type | Width [min] | Area [mAU*s] | Height [mAU] | Area %  |
|--------|---------------|------|-------------|--------------|--------------|---------|
| 1      | 4.563         | BB   | 0.0701      | 7.72457      | 1.72887      | 0.8826  |
| 2      | 5.559         | BB   | 0.0680      | 25.69799     | 5.76098      | 2.9363  |
| 3      | 6.397         | BB   | 0.0629      | 827.57452    | 205.72047    | 94.5603 |
| 4      | 7.367         | BB   | 0.0658      | 5.94078      | 1.39272      | 0.6788  |
| 5      | 16.910        | BV   | 0.0404      | 8.24393      | 3.38779      | 0.9420  |

Totals : 875.18180 217.99084

Signal 3: DAD1 C, Sig=274,4 Ref=360,100

| Peak # | RetTime [min] | Type | Width [min] | Area [mAU*s] | Height [mAU] | Area %  |
|--------|---------------|------|-------------|--------------|--------------|---------|
| 1      | 3.543         | BB   | 0.1231      | 8.46486      | 1.16108      | 0.2753  |
| 2      | 4.564         | BB   | 0.0715      | 9.53507      | 2.08124      | 0.3101  |
| 3      | 5.062         | BV   | 0.0627      | 5.85406      | 1.40154      | 0.1904  |
| 4      | 5.194         | VV   | 0.0784      | 9.37281      | 1.80904      | 0.3048  |
| 5      | 5.560         | VB R | 0.0768      | 33.88279     | 6.72347      | 1.1019  |
| 6      | 6.115         | BV E | 0.0765      | 7.77982      | 1.50102      | 0.2530  |
| 7      | 6.200         | VV E | 0.0687      | 7.16804      | 1.47553      | 0.2331  |
| 8      | 6.397         | VB R | 0.0631      | 2940.04883   | 727.78058    | 95.6173 |

| Peak # | RetTime [min] | Type | Width [min] | Area [mAU*s] | Height [mAU] | Area % |
|--------|---------------|------|-------------|--------------|--------------|--------|
| 9      | 6.809         | BB   | 0.0625      | 18.55397     | 4.65546      | 0.6034 |
| 10     | 7.366         | BB   | 0.0718      | 28.15342     | 5.88808      | 0.9156 |
| 11     | 16.917        | BV   | 0.0421      | 5.99340      | 2.31978      | 0.1949 |

Totals : 3074.80706 756.79680

=====  
\*\*\* End of Report \*\*\*

Sample Name: LC0561

**Compound 20c**

=====

Acq. Operator : SYSTEM Seq. Line : 2  
Acq. Instrument : CDD Location : P1-F-06  
Injection Date : 4/19/2016 7:54:27 PM Inj : 1  
Inj Volume : 10.000 µl

Method : C:\Chem32\1\Data\Sir2 Purity test MeCN\_rui 2016-04-19 19-34-54\Sir2 purity\_  
30-100%MeCN.M (Sequence Method)

Last changed : 4/19/2016 7:34:54 PM by SYSTEM

Method Info : test

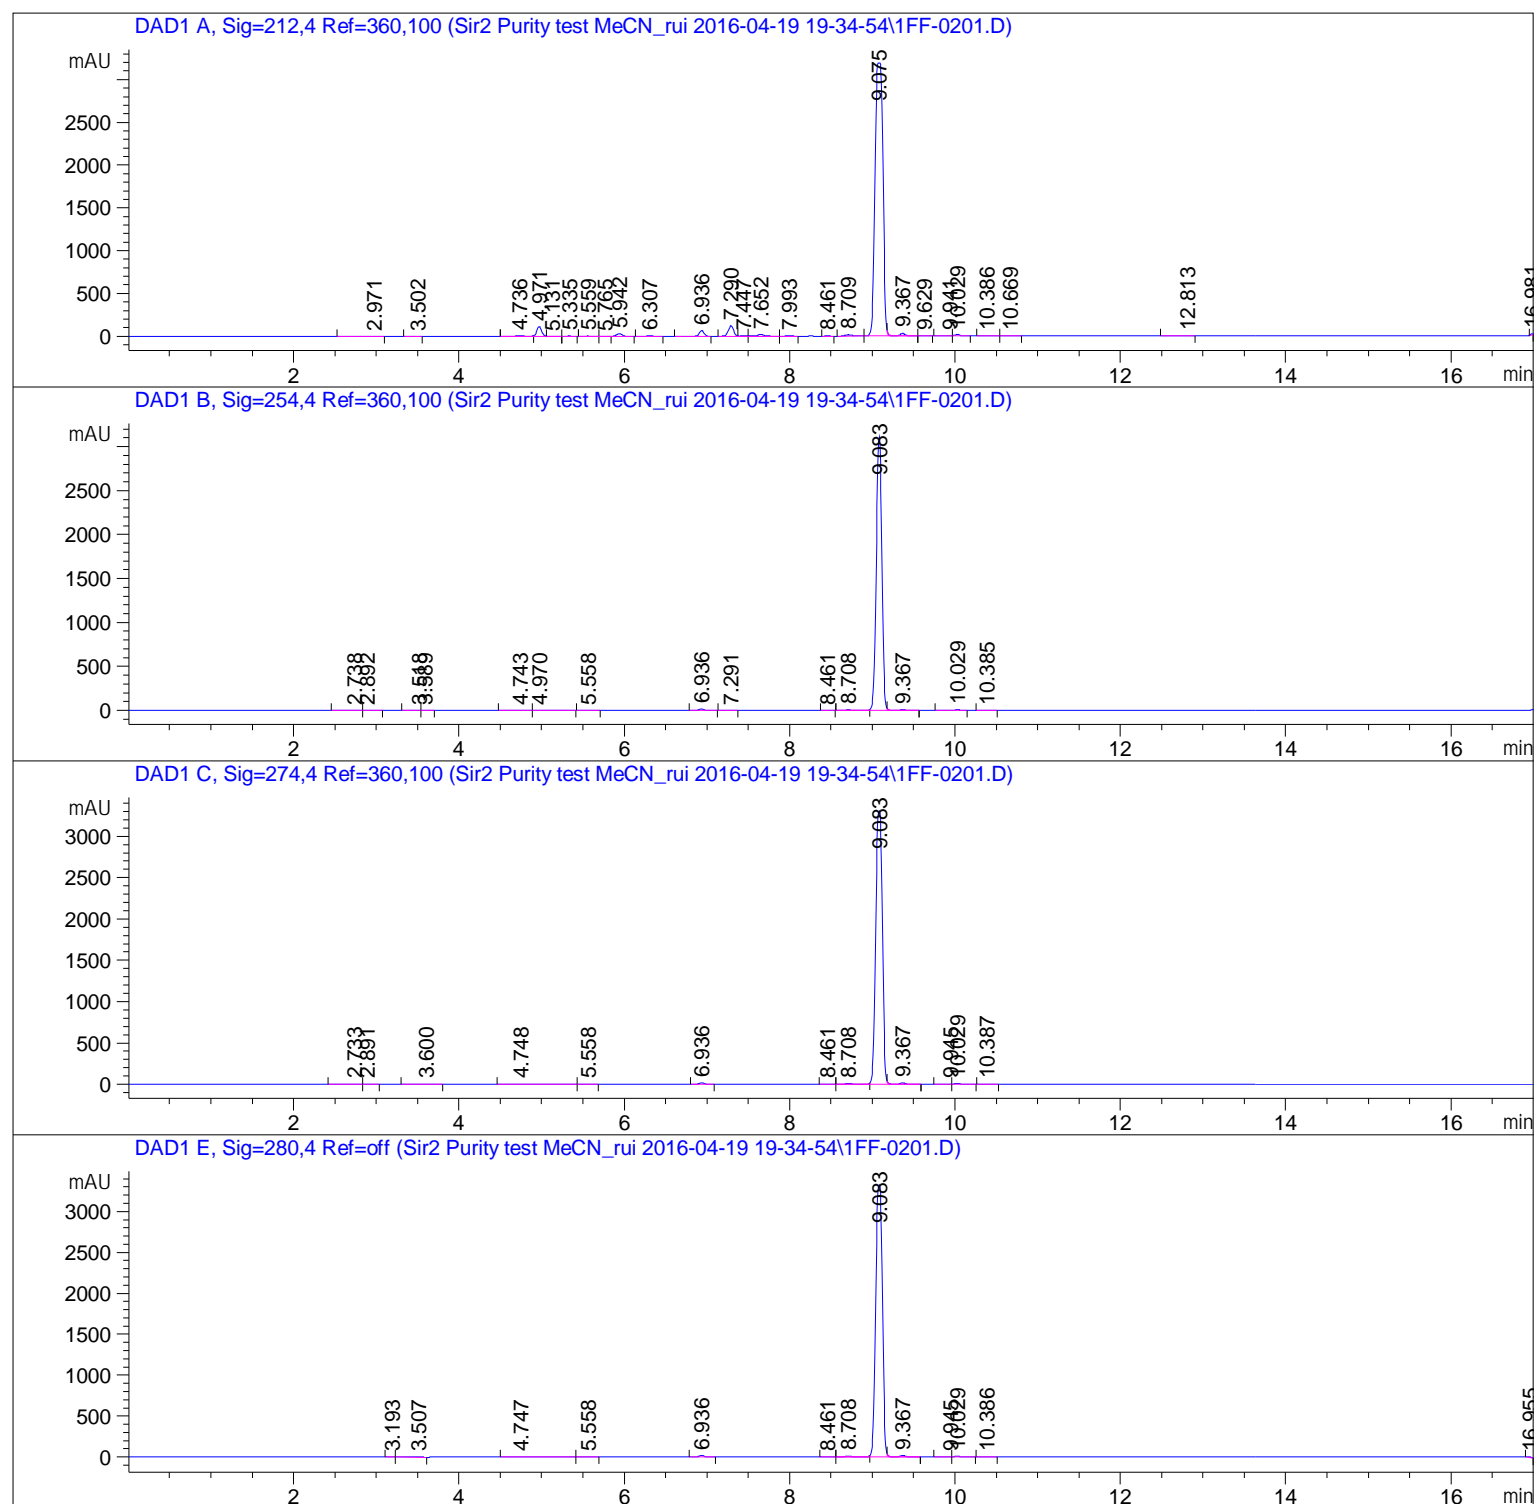

Sample Name: LC0561

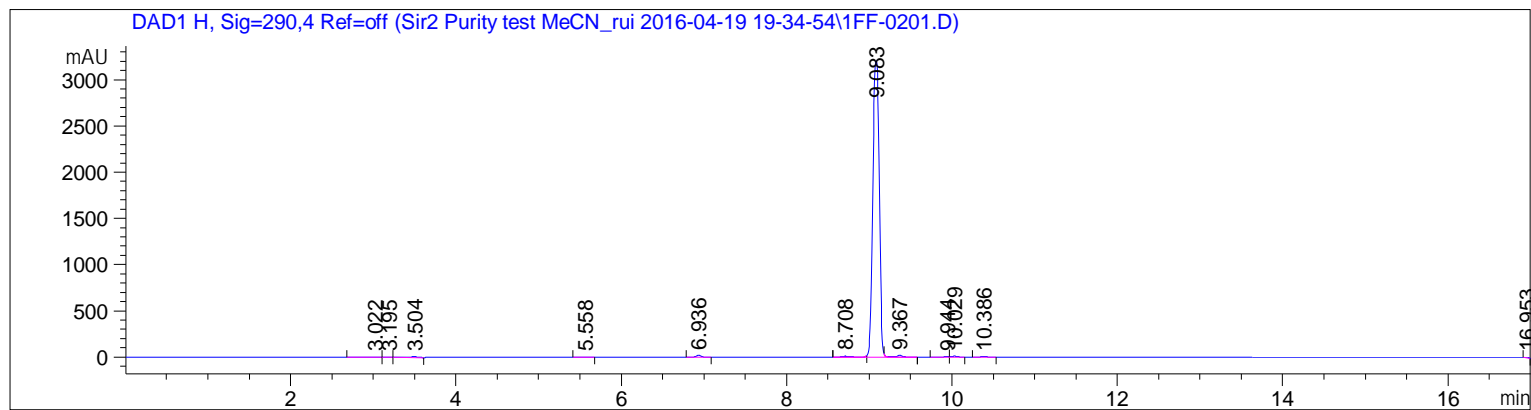

=====  
 Area Percent Report  
 =====

Sorted By : Signal  
 Multiplier : 1.0000  
 Dilution : 1.0000  
 Use Multiplier & Dilution Factor with ISTDs

Signal 1: DAD1 A, Sig=212,4 Ref=360,100

| Peak # | RetTime [min] | Type | Width [min] | Area [mAU*s] | Height [mAU] | Area %  |
|--------|---------------|------|-------------|--------------|--------------|---------|
| 1      | 2.971         | BB   | 0.2929      | 23.97148     | 1.08872      | 0.1032  |
| 2      | 3.502         | BB   | 0.0899      | 14.01491     | 2.27523      | 0.0604  |
| 3      | 4.736         | BV E | 0.0972      | 62.34415     | 8.96105      | 0.2685  |
| 4      | 4.971         | VV R | 0.0648      | 479.99155    | 114.85512    | 2.0669  |
| 5      | 5.131         | VB E | 0.0716      | 7.13292      | 1.44495      | 0.0307  |
| 6      | 5.335         | BB   | 0.0632      | 14.15882     | 3.49929      | 0.0610  |
| 7      | 5.559         | BV E | 0.0731      | 16.05919     | 3.27905      | 0.0692  |
| 8      | 5.765         | VV E | 0.0624      | 8.85818      | 2.13411      | 0.0381  |
| 9      | 5.942         | VB R | 0.0690      | 140.88983    | 31.04236     | 0.6067  |
| 10     | 6.307         | BB   | 0.0856      | 25.62046     | 4.42252      | 0.1103  |
| 11     | 6.936         | BB   | 0.0619      | 262.16064    | 66.60017     | 1.1289  |
| 12     | 7.290         | BV R | 0.0702      | 548.85016    | 122.67003    | 2.3635  |
| 13     | 7.447         | VV E | 0.0693      | 18.03903     | 3.95026      | 0.0777  |
| 14     | 7.652         | VB E | 0.0833      | 114.17487    | 20.39448     | 0.4917  |
| 15     | 7.993         | BB   | 0.0828      | 16.12177     | 2.99473      | 0.0694  |
| 16     | 8.461         | VB   | 0.0616      | 7.01831      | 1.79733      | 0.0302  |
| 17     | 8.709         | BB   | 0.0895      | 89.84274     | 15.08728     | 0.3869  |
| 18     | 9.075         | BV R | 0.0928      | 2.10154e4    | 3192.60181   | 90.4962 |
| 19     | 9.367         | VB E | 0.0799      | 163.21011    | 29.80590     | 0.7028  |
| 20     | 9.629         | BB   | 0.0799      | 5.86247      | 1.18199      | 0.0252  |
| 21     | 9.941         | BV   | 0.0698      | 33.67329     | 7.03749      | 0.1450  |
| 22     | 10.029        | VB   | 0.0734      | 80.61089     | 16.98809     | 0.3471  |
| 23     | 10.386        | BV   | 0.0794      | 24.73715     | 4.69921      | 0.1065  |
| 24     | 10.669        | VB   | 0.0935      | 11.22548     | 1.73477      | 0.0483  |
| 25     | 12.813        | BB   | 0.1532      | 13.95376     | 1.20395      | 0.0601  |
| 26     | 16.981        | BBA  | 0.0329      | 24.48950     | 12.39571     | 0.1055  |

Totals : 2.32224e4 3674.14560



Signal 2: DAD1 B, Sig=254,4 Ref=360,100

| Peak # | RetTime [min] | Type | Width [min] | Area [mAU*s] | Height [mAU] | Area %  |
|--------|---------------|------|-------------|--------------|--------------|---------|
| 1      | 2.738         | BV   | 0.1971      | 31.17409     | 2.07719      | 0.2091  |
| 2      | 2.892         | VB   | 0.1095      | 12.24975     | 1.71201      | 0.0822  |
| 3      | 3.518         | BV   | 0.0703      | 13.80363     | 2.86024      | 0.0926  |
| 4      | 3.589         | VB   | 0.0976      | 22.42932     | 3.65286      | 0.1504  |
| 5      | 4.743         | BV   | 0.1834      | 29.45404     | 2.36261      | 0.1976  |
| 6      | 4.970         | VB   | 0.1071      | 27.11887     | 3.40005      | 0.1819  |
| 7      | 5.558         | BB   | 0.0609      | 6.04995      | 1.50622      | 0.0406  |
| 8      | 6.936         | BB   | 0.0612      | 62.34792     | 16.10277     | 0.4182  |
| 9      | 7.291         | BB   | 0.0688      | 11.20710     | 2.57348      | 0.0752  |
| 10     | 8.461         | BB   | 0.0622      | 5.47523      | 1.38207      | 0.0367  |
| 11     | 8.708         | BV E | 0.0989      | 35.39451     | 5.23376      | 0.2374  |
| 12     | 9.083         | VV R | 0.0746      | 1.45586e4    | 3113.62842   | 97.6470 |
| 13     | 9.367         | VB E | 0.0851      | 49.32701     | 8.32594      | 0.3308  |
| 14     | 10.029        | BB   | 0.0905      | 35.51141     | 5.71699      | 0.2382  |
| 15     | 10.385        | BB   | 0.0749      | 9.27129      | 1.90181      | 0.0622  |

Totals : 1.49094e4 3172.43642

Signal 3: DAD1 C, Sig=274,4 Ref=360,100

| Peak # | RetTime [min] | Type | Width [min] | Area [mAU*s] | Height [mAU] | Area %  |
|--------|---------------|------|-------------|--------------|--------------|---------|
| 1      | 2.733         | BV   | 0.2013      | 34.67241     | 2.23154      | 0.1838  |
| 2      | 2.891         | VB   | 0.1110      | 12.65983     | 1.82239      | 0.0671  |
| 3      | 3.600         | BB   | 0.1253      | 40.47093     | 4.75257      | 0.2145  |
| 4      | 4.748         | BB   | 0.2824      | 51.86138     | 2.51643      | 0.2749  |
| 5      | 5.558         | BB   | 0.0600      | 5.85442      | 1.48354      | 0.0310  |
| 6      | 6.936         | BB   | 0.0613      | 78.48625     | 20.23083     | 0.4160  |
| 7      | 8.461         | VB   | 0.0629      | 6.65946      | 1.65669      | 0.0353  |
| 8      | 8.708         | BV E | 0.0993      | 57.54268     | 8.46605      | 0.3050  |
| 9      | 9.083         | VV R | 0.0909      | 1.84154e4    | 3309.42480   | 97.6167 |
| 10     | 9.367         | VB E | 0.0826      | 88.95346     | 15.57627     | 0.4715  |
| 11     | 9.945         | BV   | 0.0608      | 14.37816     | 3.43916      | 0.0762  |
| 12     | 10.029        | VB   | 0.0735      | 46.85403     | 9.84088      | 0.2484  |
| 13     | 10.387        | BB   | 0.0786      | 11.20825     | 2.23237      | 0.0594  |

Totals : 1.88650e4 3383.67351

Signal 4: DAD1 E, Sig=280,4 Ref=off

| Peak # | RetTime [min] | Type | Width [min] | Area [mAU*s] | Height [mAU] | Area % |
|--------|---------------|------|-------------|--------------|--------------|--------|
| 1      | 3.193         | BV   | 0.0718      | 7.22377      | 1.45836      | 0.0377 |
| 2      | 3.507         | VB   | 0.1553      | 75.71667     | 6.43261      | 0.3946 |
| 3      | 4.747         | BB   | 0.2898      | 42.30599     | 2.02454      | 0.2205 |

| Peak # | RetTime [min] | Type | Width [min] | Area [mAU*s] | Height [mAU] | Area %  |
|--------|---------------|------|-------------|--------------|--------------|---------|
| 4      | 5.558         | BB   | 0.0604      | 7.26961      | 1.82726      | 0.0379  |
| 5      | 6.936         | BB   | 0.0613      | 81.83537     | 21.06169     | 0.4265  |
| 6      | 8.461         | VB   | 0.0626      | 6.08404      | 1.52410      | 0.0317  |
| 7      | 8.708         | BV E | 0.0995      | 61.95412     | 9.09416      | 0.3229  |
| 8      | 9.083         | VV R | 0.0935      | 1.86966e4    | 3328.13403   | 97.4499 |
| 9      | 9.367         | VB E | 0.0813      | 98.97906     | 17.69429     | 0.5159  |
| 10     | 9.945         | BV   | 0.0609      | 15.44033     | 3.68574      | 0.0805  |
| 11     | 10.029        | VB   | 0.0734      | 48.94416     | 10.29948     | 0.2551  |
| 12     | 10.386        | BB   | 0.0753      | 15.74745     | 3.20423      | 0.0821  |
| 13     | 16.955        | BBA  | 0.0423      | 27.76842     | 9.45545      | 0.1447  |

Totals : 1.91859e4 3415.89594

Signal 5: DAD1 H, Sig=290,4 Ref=off

| Peak # | RetTime [min] | Type | Width [min] | Area [mAU*s] | Height [mAU] | Area %  |
|--------|---------------|------|-------------|--------------|--------------|---------|
| 1      | 3.022         | BV   | 0.1953      | 47.24429     | 3.18072      | 0.2635  |
| 2      | 3.195         | VV   | 0.0964      | 31.49477     | 4.45747      | 0.1757  |
| 3      | 3.504         | VB   | 0.2045      | 116.55663    | 7.44996      | 0.6501  |
| 4      | 5.558         | BB   | 0.0603      | 7.24010      | 1.82488      | 0.0404  |
| 5      | 6.936         | BB   | 0.0614      | 73.50731     | 18.90821     | 0.4100  |
| 6      | 8.708         | BV E | 0.0996      | 60.04515     | 8.80069      | 0.3349  |
| 7      | 9.083         | VV R | 0.0893      | 1.73973e4    | 3207.60718   | 97.0399 |
| 8      | 9.367         | VB E | 0.0793      | 94.28597     | 17.37395     | 0.5259  |
| 9      | 9.944         | BV   | 0.0608      | 14.10291     | 3.37004      | 0.0787  |
| 10     | 10.029        | VB   | 0.0731      | 42.58501     | 9.01387      | 0.2375  |
| 11     | 10.386        | BB   | 0.0752      | 16.70947     | 3.40845      | 0.0932  |
| 12     | 16.953        | BBA  | 0.0488      | 26.91956     | 9.19387      | 0.1502  |

Totals : 1.79280e4 3294.58930

=====  
\*\*\* End of Report \*\*\*

Sample Name: LC0542

**Compound 21a**

```
=====
Acq. Operator   : SYSTEM                      Seq. Line :   39
Acq. Instrument : CDD                        Location  :   Pl-E-03
Injection Date  : 4/16/2016 4:06:52 AM        Inj       :    1
                                           Inj Volume: 10.000 µl
Method         : C:\Chem32\1\Data\Sir2 Purity test MeCN_rui 2016-04-15 16-44-07\Sir2 purity_
                30-100%MeCN.M (Sequence Method)
Last changed    : 4/15/2016 4:44:07 PM by SYSTEM
Method Info     : test
=====
```

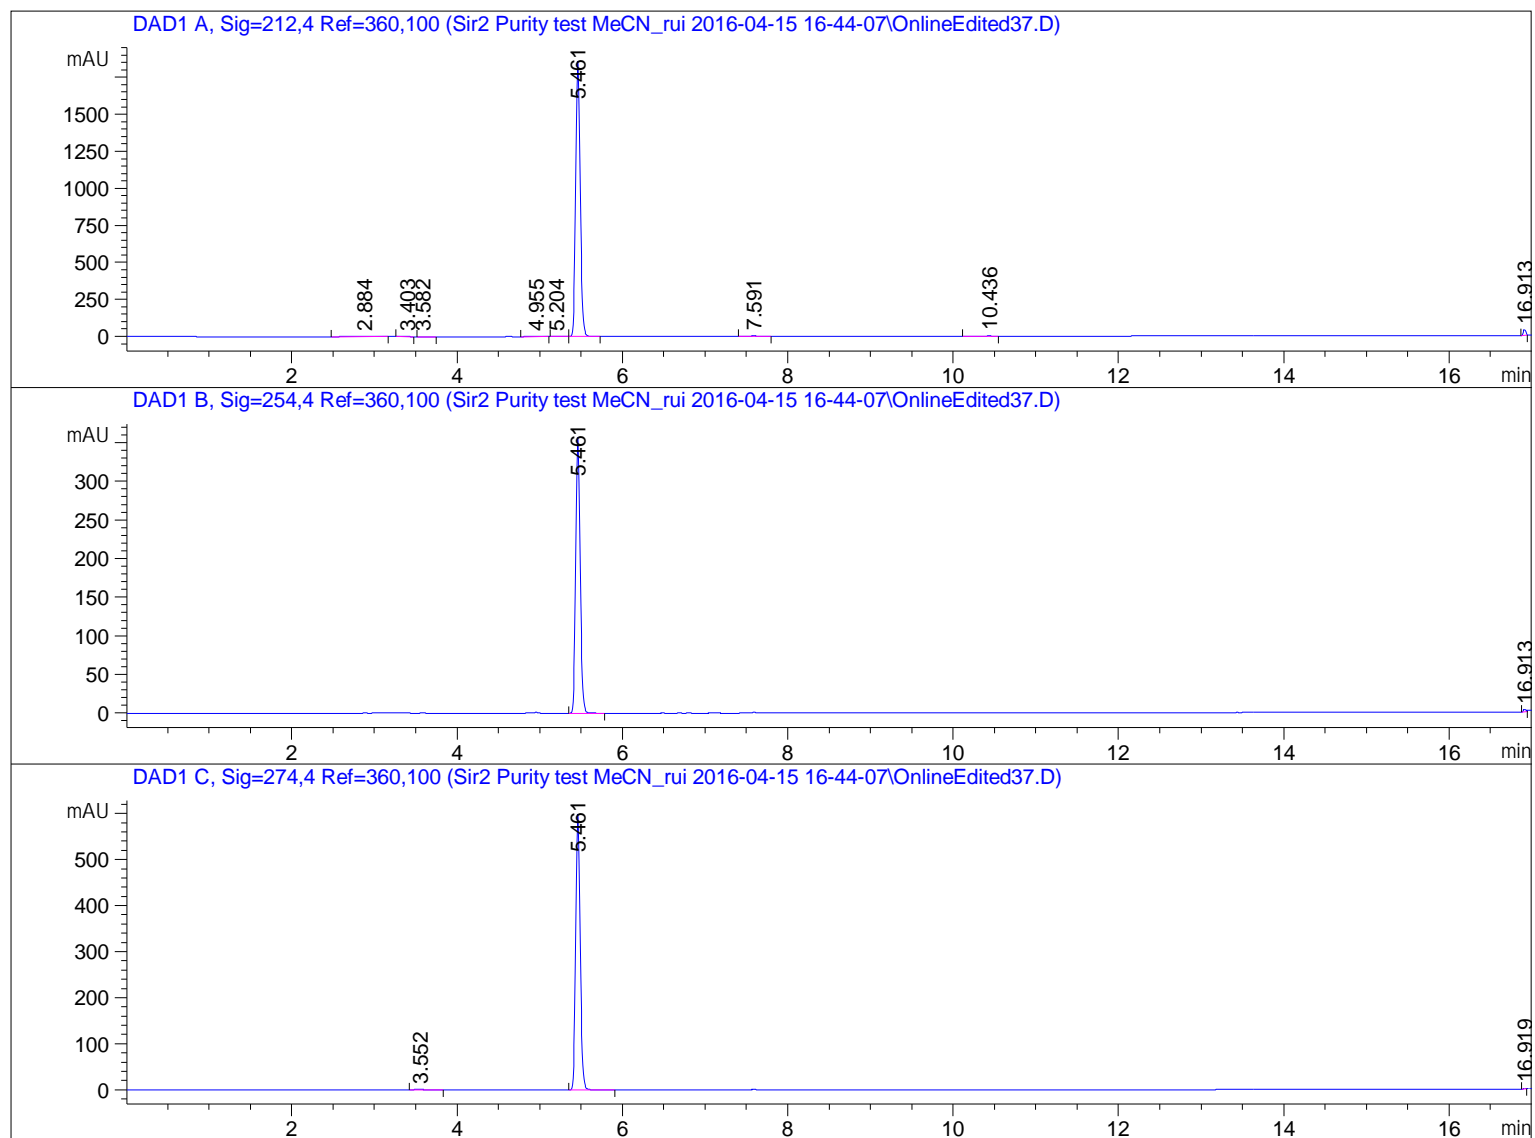

=====  
Area Percent Report  
=====

```
Sorted By      :      Signal
Multiplier     :      1.0000
Dilution       :      1.0000
Use Multiplier & Dilution Factor with ISTDs
```

Signal 1: DAD1 A, Sig=212,4 Ref=360,100

| Peak # | RetTime [min] | Type | Width [min] | Area [mAU*s] | Height [mAU] | Area %  |
|--------|---------------|------|-------------|--------------|--------------|---------|
| 1      | 2.884         | BB   | 0.2049      | 22.44945     | 1.40167      | 0.3042  |
| 2      | 3.403         | BB   | 0.0911      | 13.65471     | 2.17994      | 0.1850  |
| 3      | 3.582         | BB   | 0.0899      | 9.84433      | 1.51260      | 0.1334  |
| 4      | 4.955         | VB R | 0.0719      | 17.40546     | 3.63516      | 0.2358  |
| 5      | 5.204         | BB   | 0.0622      | 6.94315      | 1.67997      | 0.0941  |
| 6      | 5.461         | BB   | 0.0610      | 7194.17529   | 1866.08276   | 97.4777 |
| 7      | 7.591         | BB   | 0.0776      | 15.78719     | 3.09088      | 0.2139  |
| 8      | 10.436        | BB   | 0.0740      | 6.78692      | 1.41333      | 0.0920  |
| 9      | 16.913        | BB   | 0.0394      | 93.27946     | 39.74961     | 1.2639  |

Totals : 7380.32596 1920.74593

Signal 2: DAD1 B, Sig=254,4 Ref=360,100

| Peak # | RetTime [min] | Type | Width [min] | Area [mAU*s] | Height [mAU] | Area %  |
|--------|---------------|------|-------------|--------------|--------------|---------|
| 1      | 5.461         | BB   | 0.0605      | 1366.16907   | 357.88062    | 99.4488 |
| 2      | 16.913        | BV   | 0.0405      | 7.57207      | 3.10375      | 0.5512  |

Totals : 1373.74114 360.98436

Signal 3: DAD1 C, Sig=274,4 Ref=360,100

| Peak # | RetTime [min] | Type | Width [min] | Area [mAU*s] | Height [mAU] | Area %  |
|--------|---------------|------|-------------|--------------|--------------|---------|
| 1      | 3.552         | BB   | 0.1263      | 8.07735      | 1.06699      | 0.3501  |
| 2      | 5.461         | BB   | 0.0605      | 2293.74487   | 600.84644    | 99.4152 |
| 3      | 16.919        | BV   | 0.0426      | 5.41542      | 2.06471      | 0.2347  |

Totals : 2307.23765 603.97814

\*\*\* End of Report \*\*\*

Sample Name: LC0539

## Compound 21b

```
=====
Acq. Operator   : SYSTEM                      Seq. Line :   40
Acq. Instrument : CDD                        Location  :   Pl-E-04
Injection Date  : 4/16/2016 4:24:47 AM        Inj       :    1
                                           Inj Volume: 10.000 µl
Method          : C:\Chem32\1\Data\Sir2 Purity test MeCN_rui 2016-04-15 16-44-07\Sir2 purity_
                  30-100%MeCN.M (Sequence Method)
Last changed    : 4/15/2016 4:44:07 PM by SYSTEM
Method Info     : test
=====
```

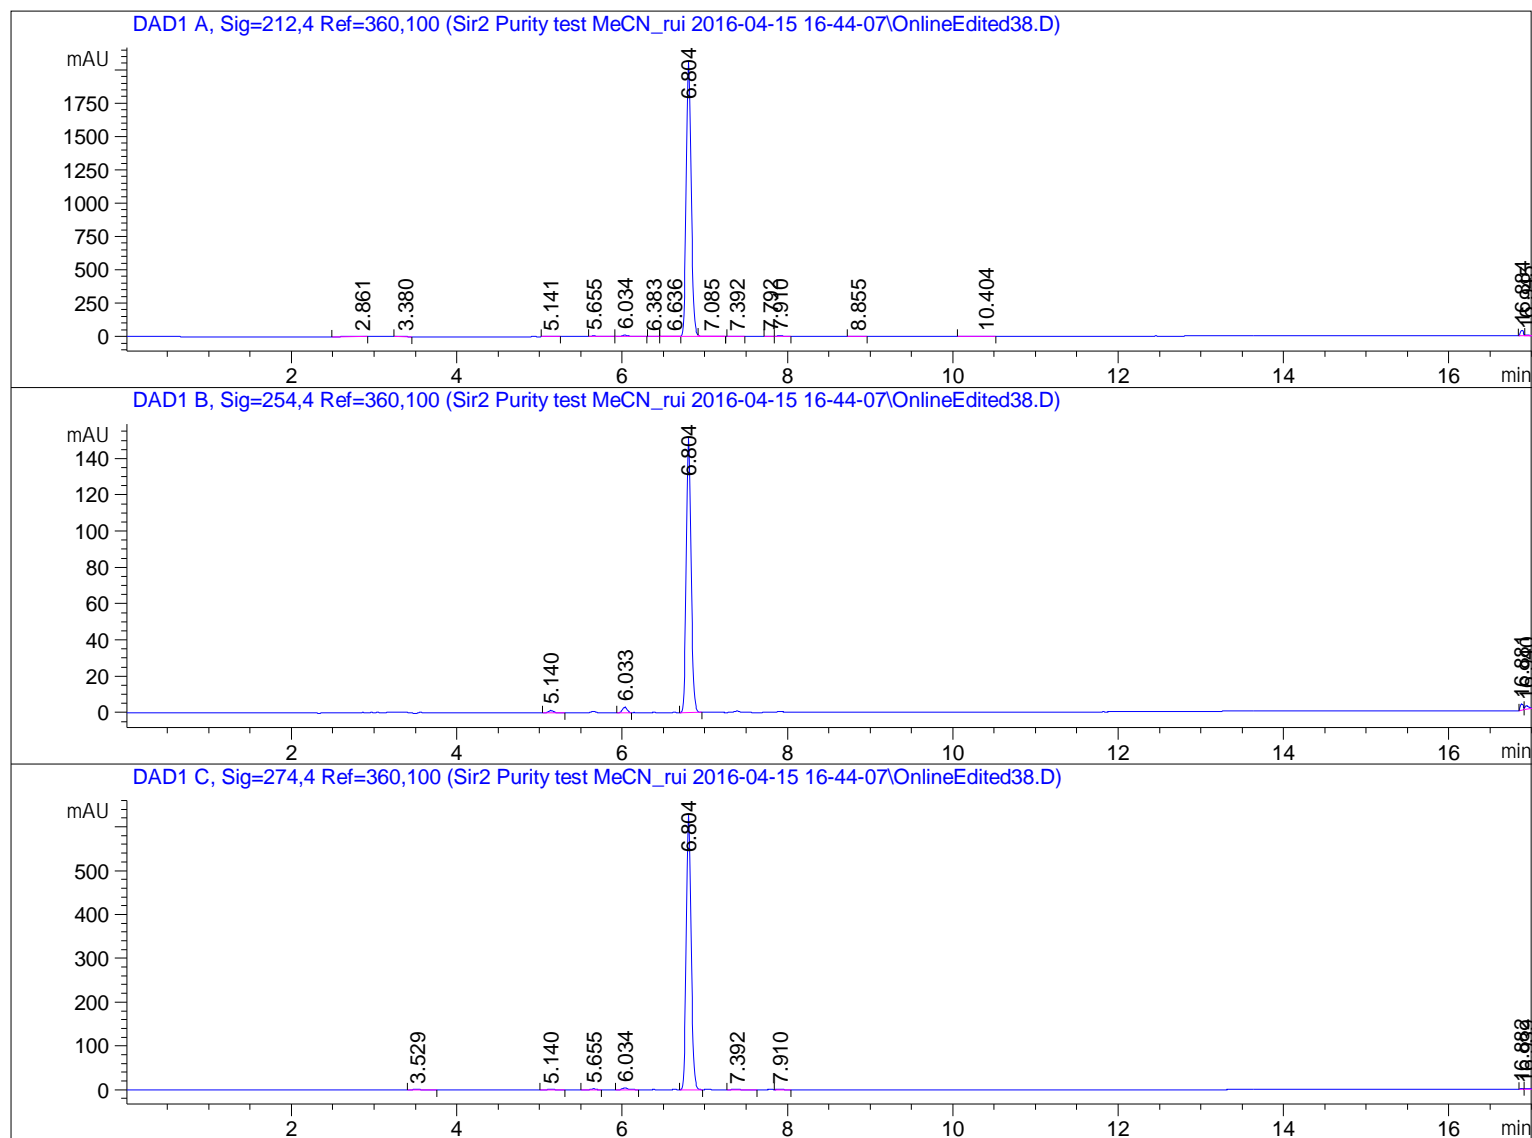

```
=====
Area Percent Report
=====
```

```
Sorted By      :      Signal
Multiplier     :      1.0000
Dilution       :      1.0000
Use Multiplier & Dilution Factor with ISTDs
```

Signal 1: DAD1 A, Sig=212,4 Ref=360,100

| Peak # | RetTime [min] | Type | Width [min] | Area [mAU*s] | Height [mAU] | Area %  |
|--------|---------------|------|-------------|--------------|--------------|---------|
| 1      | 2.861         | BV   | 0.1160      | 10.39958     | 1.23792      | 0.1149  |
| 2      | 3.380         | BB   | 0.0880      | 13.33332     | 2.16097      | 0.1474  |
| 3      | 5.141         | BB   | 0.0693      | 17.57088     | 3.99485      | 0.1942  |
| 4      | 5.655         | VV R | 0.0728      | 26.43756     | 5.43317      | 0.2922  |
| 5      | 6.034         | BV R | 0.0865      | 58.50658     | 9.95825      | 0.6466  |
| 6      | 6.383         | BB   | 0.0601      | 5.82342      | 1.54158      | 0.0644  |
| 7      | 6.636         | BV E | 0.0668      | 11.84626     | 2.72000      | 0.1309  |
| 8      | 6.804         | VV R | 0.0651      | 8729.20703   | 2073.64307   | 96.4724 |
| 9      | 7.085         | VB E | 0.1342      | 12.77665     | 1.24056      | 0.1412  |
| 10     | 7.392         | BB   | 0.0741      | 10.24076     | 1.98763      | 0.1132  |
| 11     | 7.792         | BV   | 0.0646      | 6.37903      | 1.53234      | 0.0705  |
| 12     | 7.910         | VB   | 0.0702      | 20.19344     | 4.34787      | 0.2232  |
| 13     | 8.855         | BB   | 0.0824      | 5.35865      | 1.00208      | 0.0592  |
| 14     | 10.404        | BB   | 0.0729      | 7.19528      | 1.47652      | 0.0795  |
| 15     | 16.884        | BV R | 0.0404      | 101.00175    | 41.43216     | 1.1162  |
| 16     | 16.945        | VBAE | 0.0436      | 12.12395     | 4.47588      | 0.1340  |

Totals : 9048.39415 2158.18483

Signal 2: DAD1 B, Sig=254,4 Ref=360,100

| Peak # | RetTime [min] | Type | Width [min] | Area [mAU*s] | Height [mAU] | Area %  |
|--------|---------------|------|-------------|--------------|--------------|---------|
| 1      | 5.140         | BB   | 0.0685      | 5.67379      | 1.31106      | 0.8668  |
| 2      | 6.033         | BB   | 0.0647      | 12.09474     | 3.02032      | 1.8478  |
| 3      | 6.804         | BB   | 0.0637      | 622.72363    | 152.32570    | 95.1385 |
| 4      | 16.881        | BV   | 0.0400      | 8.23631      | 3.43242      | 1.2583  |
| 5      | 16.940        | VBA  | 0.0446      | 5.81608      | 1.96173      | 0.8886  |

Totals : 654.54455 162.05124

Signal 3: DAD1 C, Sig=274,4 Ref=360,100

| Peak # | RetTime [min] | Type | Width [min] | Area [mAU*s] | Height [mAU] | Area %  |
|--------|---------------|------|-------------|--------------|--------------|---------|
| 1      | 3.529         | BB   | 0.1036      | 7.18098      | 1.02688      | 0.2684  |
| 2      | 5.140         | BB   | 0.0685      | 8.15334      | 1.88176      | 0.3048  |
| 3      | 5.655         | BB   | 0.0698      | 10.34470     | 2.24309      | 0.3867  |
| 4      | 6.034         | BB   | 0.0729      | 20.36735     | 4.33076      | 0.7613  |
| 5      | 6.804         | BB   | 0.0641      | 2603.33862   | 631.55505    | 97.3090 |
| 6      | 7.392         | BB   | 0.0936      | 6.77986      | 1.01962      | 0.2534  |
| 7      | 7.910         | VB   | 0.0715      | 6.72201      | 1.41386      | 0.2513  |
| 8      | 16.882        | BV   | 0.0411      | 6.44055      | 2.57811      | 0.2407  |
| 9      | 16.939        | VBA  | 0.0453      | 6.00471      | 1.98177      | 0.2244  |

Totals : 2675.33212 648.03090

=====  
\*\*\* End of Report \*\*\*

Sample Name: LC0538

**Compound 21c**

```
=====
Acq. Operator   : SYSTEM                      Seq. Line :   41
Acq. Instrument : CDD                        Location  :   P1-E-05
Injection Date  : 4/16/2016 4:42:43 AM        Inj       :    1
                                           Inj Volume: 10.000 µl
Method         : C:\Chem32\1\Data\Sir2 Purity test MeCN_rui 2016-04-15 16-44-07\Sir2 purity_
                  30-100%MeCN.M (Sequence Method)
Last changed    : 4/15/2016 4:44:07 PM by SYSTEM
Method Info     : test
=====
```

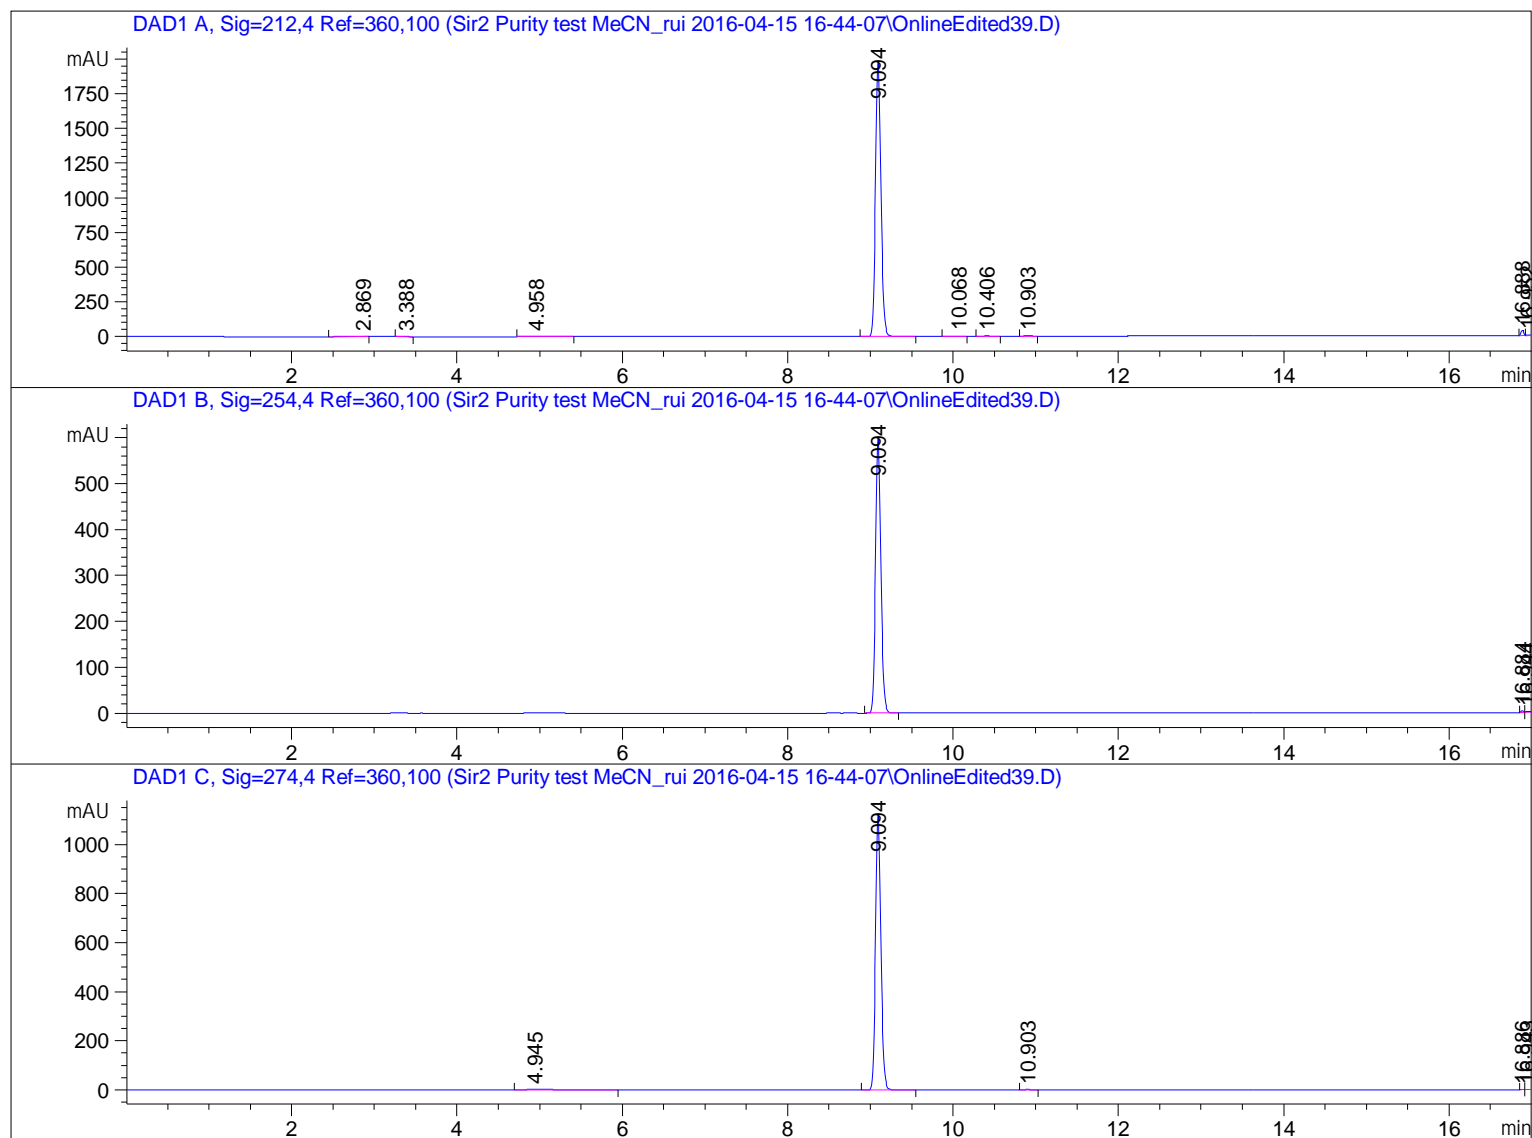

=====  
Area Percent Report  
=====

```
Sorted By      :      Signal
Multiplier     :      1.0000
Dilution       :      1.0000
Use Multiplier & Dilution Factor with ISTDs
```



Signal 1: DAD1 A, Sig=212,4 Ref=360,100

| Peak # | RetTime [min] | Type | Width [min] | Area [mAU*s] | Height [mAU] | Area %  |
|--------|---------------|------|-------------|--------------|--------------|---------|
| 1      | 2.869         | BV   | 0.1364      | 14.32934     | 1.41219      | 0.1530  |
| 2      | 3.388         | BB   | 0.0854      | 13.45081     | 2.19805      | 0.1436  |
| 3      | 4.958         | BB   | 0.2725      | 41.55598     | 2.14042      | 0.4437  |
| 4      | 9.094         | BB   | 0.0716      | 9169.08691   | 1995.50012   | 97.9030 |
| 5      | 10.068        | BB   | 0.0699      | 5.63814      | 1.21998      | 0.0602  |
| 6      | 10.406        | BB   | 0.0733      | 6.83470      | 1.44200      | 0.0730  |
| 7      | 10.903        | BB   | 0.0776      | 13.00874     | 2.63465      | 0.1389  |
| 8      | 16.888        | BV R | 0.0398      | 93.03489     | 39.07999     | 0.9934  |
| 9      | 16.952        | VBAE | 0.0431      | 8.54230      | 3.30054      | 0.0912  |

Totals : 9365.48181 2048.92794

Signal 2: DAD1 B, Sig=254,4 Ref=360,100

| Peak # | RetTime [min] | Type | Width [min] | Area [mAU*s] | Height [mAU] | Area %  |
|--------|---------------|------|-------------|--------------|--------------|---------|
| 1      | 9.094         | BB   | 0.0686      | 2721.73901   | 603.20520    | 99.5438 |
| 2      | 16.884        | BV   | 0.0396      | 7.39990      | 3.12706      | 0.2706  |
| 3      | 16.944        | VBA  | 0.0423      | 5.07339      | 1.83032      | 0.1856  |

Totals : 2734.21231 608.16258

Signal 3: DAD1 C, Sig=274,4 Ref=360,100

| Peak # | RetTime [min] | Type | Width [min] | Area [mAU*s] | Height [mAU] | Area %  |
|--------|---------------|------|-------------|--------------|--------------|---------|
| 1      | 4.945         | BB   | 0.3006      | 40.42931     | 1.91236      | 0.7837  |
| 2      | 9.094         | BB   | 0.0687      | 5102.22266   | 1129.76135   | 98.8981 |
| 3      | 10.903        | BB   | 0.0777      | 5.36385      | 1.08452      | 0.1040  |
| 4      | 16.886        | BV   | 0.0409      | 5.80721      | 2.34419      | 0.1126  |
| 5      | 16.943        | VBA  | 0.0438      | 5.24997      | 1.81025      | 0.1018  |

Totals : 5159.07299 1136.91268

=====  
\*\*\* End of Report \*\*\*

Sample Name: LC0557

## Compound 22a

```
=====
Acq. Operator   : SYSTEM                      Seq. Line :   42
Acq. Instrument : CDD                        Location  :   Pl-E-06
Injection Date  : 4/16/2016 5:00:39 AM        Inj       :    1
                                           Inj Volume: 10.000 µl
Method          : C:\Chem32\1\Data\Sir2 Purity test MeCN_rui 2016-04-15 16-44-07\Sir2 purity_
                  30-100%MeCN.M (Sequence Method)
Last changed    : 4/15/2016 4:44:07 PM by SYSTEM
Method Info     : test
=====
```

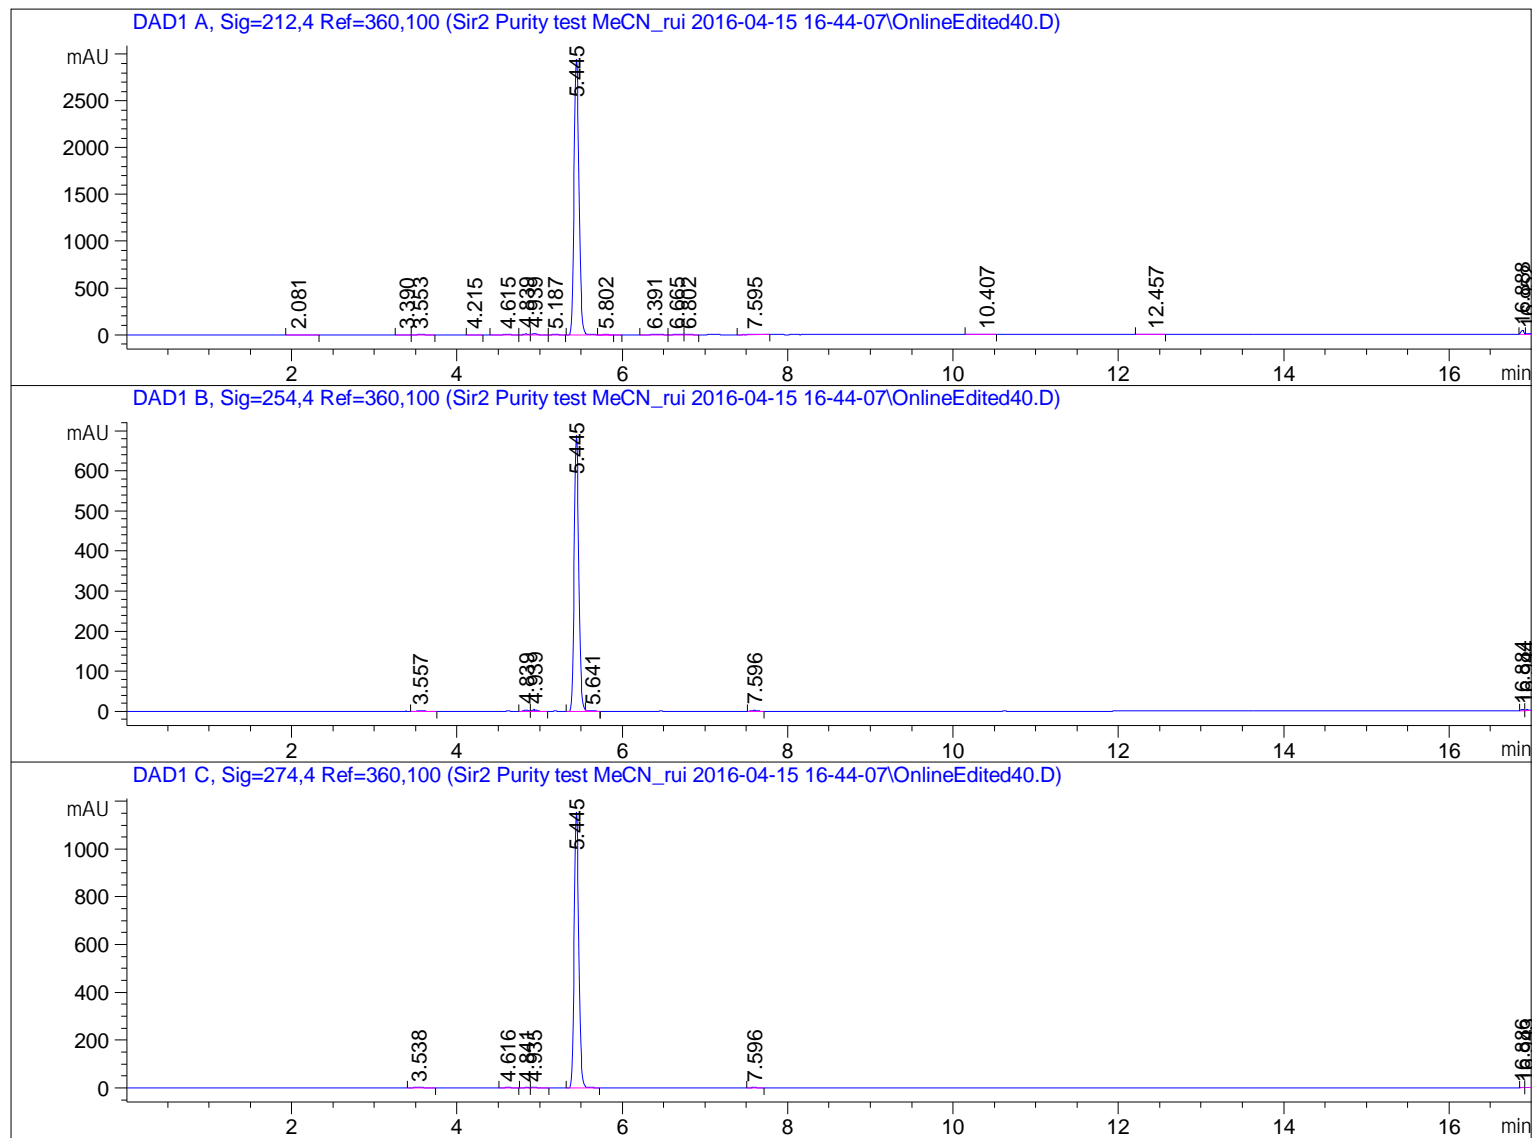

```
=====
Area Percent Report
=====
```

```
Sorted By      :      Signal
Multiplier     :      1.0000
Dilution       :      1.0000
Use Multiplier & Dilution Factor with ISTDs
```

Signal 1: DAD1 A, Sig=212,4 Ref=360,100

| Peak # | RetTime [min] | Type | Width [min] | Area [mAU*s] | Height [mAU] | Area %  |
|--------|---------------|------|-------------|--------------|--------------|---------|
| 1      | 2.081         | BB   | 0.2107      | 18.63899     | 1.17749      | 0.1469  |
| 2      | 3.390         | BB   | 0.0695      | 6.96049      | 1.46227      | 0.0549  |
| 3      | 3.553         | BB   | 0.0985      | 26.55713     | 3.75329      | 0.2093  |
| 4      | 4.215         | BB   | 0.0832      | 9.00953      | 1.71706      | 0.0710  |
| 5      | 4.615         | VB R | 0.0783      | 35.13869     | 6.37819      | 0.2769  |
| 6      | 4.839         | BV   | 0.0585      | 36.77551     | 9.64666      | 0.2898  |
| 7      | 4.939         | VB   | 0.0639      | 53.78519     | 12.57866     | 0.4239  |
| 8      | 5.187         | BB   | 0.0623      | 29.27809     | 7.37749      | 0.2307  |
| 9      | 5.445         | BV R | 0.0665      | 1.22702e4    | 2950.33887   | 96.7052 |
| 10     | 5.802         | VV E | 0.0846      | 9.39793      | 1.64654      | 0.0741  |
| 11     | 6.391         | BV   | 0.0800      | 23.53324     | 4.28727      | 0.1855  |
| 12     | 6.665         | VV   | 0.1029      | 8.64895      | 1.34788      | 0.0682  |
| 13     | 6.802         | VB   | 0.0720      | 6.15820      | 1.28264      | 0.0485  |
| 14     | 7.595         | BB   | 0.0792      | 34.23397     | 6.74761      | 0.2698  |
| 15     | 10.407        | BV   | 0.0794      | 7.75513      | 1.47378      | 0.0611  |
| 16     | 12.457        | BB   | 0.1073      | 8.57940      | 1.12066      | 0.0676  |
| 17     | 16.888        | BV R | 0.0397      | 96.00304     | 40.37093     | 0.7566  |
| 18     | 16.952        | VBAE | 0.0429      | 7.60337      | 2.95185      | 0.0599  |

Totals : 1.26883e4 3055.65915

Signal 2: DAD1 B, Sig=254,4 Ref=360,100

| Peak # | RetTime [min] | Type | Width [min] | Area [mAU*s] | Height [mAU] | Area %  |
|--------|---------------|------|-------------|--------------|--------------|---------|
| 1      | 3.557         | BB   | 0.0938      | 7.10773      | 1.06640      | 0.2616  |
| 2      | 4.839         | BV   | 0.0591      | 12.27004     | 3.17701      | 0.4516  |
| 3      | 4.939         | VB   | 0.0652      | 15.84724     | 3.75558      | 0.5832  |
| 4      | 5.445         | BV R | 0.0589      | 2653.37476   | 688.85657    | 97.6503 |
| 5      | 5.641         | VB E | 0.0689      | 5.96602      | 1.26890      | 0.2196  |
| 6      | 7.596         | BB   | 0.0729      | 9.77822      | 2.07857      | 0.3599  |
| 7      | 16.884        | BV   | 0.0397      | 7.67684      | 3.22997      | 0.2825  |
| 8      | 16.944        | VBA  | 0.0423      | 5.20053      | 1.87843      | 0.1914  |

Totals : 2717.22138 705.31143

Signal 3: DAD1 C, Sig=274,4 Ref=360,100

| Peak # | RetTime [min] | Type | Width [min] | Area [mAU*s] | Height [mAU] | Area %  |
|--------|---------------|------|-------------|--------------|--------------|---------|
| 1      | 3.538         | BB   | 0.1142      | 17.50183     | 2.16856      | 0.3872  |
| 2      | 4.616         | BB   | 0.0652      | 12.06503     | 2.75044      | 0.2669  |
| 3      | 4.841         | BV   | 0.0591      | 5.55454      | 1.43643      | 0.1229  |
| 4      | 4.935         | VB   | 0.0699      | 9.14992      | 1.90973      | 0.2024  |
| 5      | 5.445         | BV R | 0.0590      | 4457.62793   | 1155.63184   | 98.6066 |

| Peak<br># | RetTime<br>[min] | Type | Width<br>[min] | Area<br>[mAU*s] | Height<br>[mAU] | Area<br>% |
|-----------|------------------|------|----------------|-----------------|-----------------|-----------|
| 6         | 7.596            | BB   | 0.0737         | 7.18279         | 1.50464         | 0.1589    |
| 7         | 16.886           | BV   | 0.0410         | 6.19305         | 2.48742         | 0.1370    |
| 8         | 16.943           | VBA  | 0.0436         | 5.34298         | 1.85592         | 0.1182    |

Totals : 4520.61807 1169.74497

=====  
\*\*\* End of Report \*\*\*

Sample Name: LC0537

**Compound 22b**

```
=====
Acq. Operator   : SYSTEM                      Seq. Line :   43
Acq. Instrument : CDD                        Location  :   Pl-E-07
Injection Date  : 4/16/2016 5:18:37 AM        Inj       :    1
                                           Inj Volume: 10.000 µl
Method         : C:\Chem32\1\Data\Sir2 Purity test MeCN_rui 2016-04-15 16-44-07\Sir2 purity_
                30-100%MeCN.M (Sequence Method)
Last changed    : 4/15/2016 4:44:07 PM by SYSTEM
Method Info     : test
=====
```

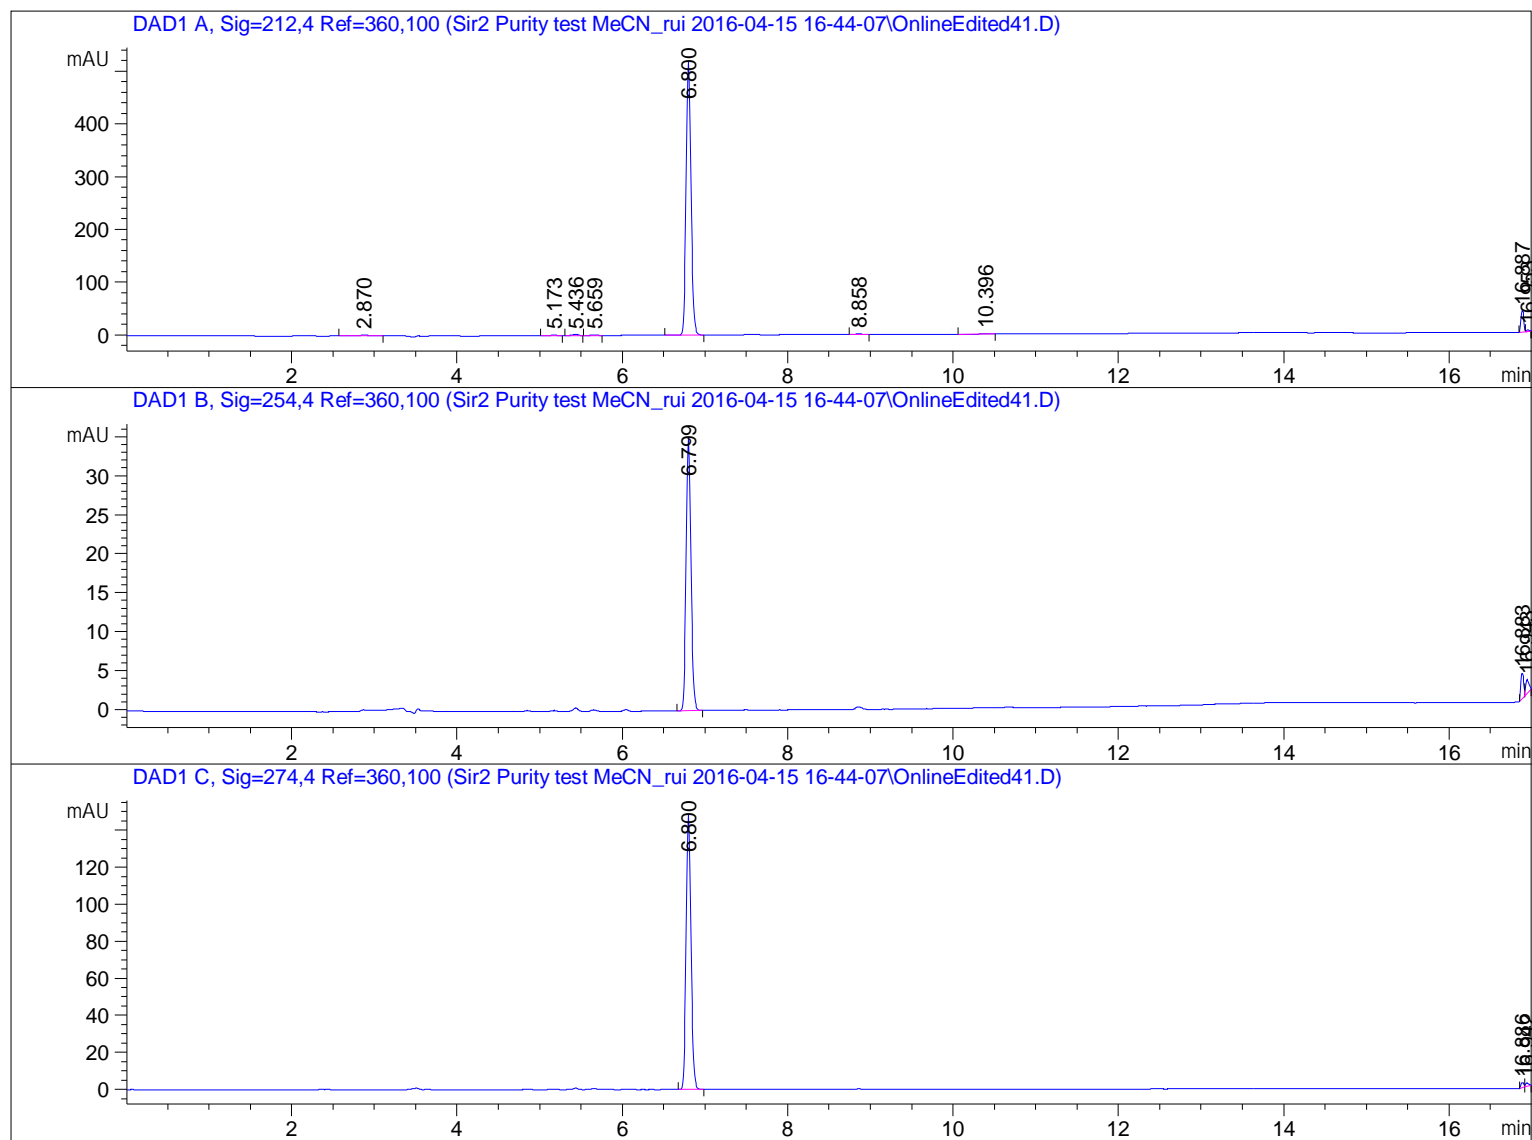

=====  
Area Percent Report  
=====

```
Sorted By      :      Signal
Multiplier     :      1.0000
Dilution       :      1.0000
Use Multiplier & Dilution Factor with ISTDs
```

Signal 1: DAD1 A, Sig=212,4 Ref=360,100

| Peak # | RetTime [min] | Type | Width [min] | Area [mAU*s] | Height [mAU] | Area %  |
|--------|---------------|------|-------------|--------------|--------------|---------|
| 1      | 2.870         | BB   | 0.1529      | 12.29305     | 1.04776      | 0.5300  |
| 2      | 5.173         | BB   | 0.0687      | 5.20754      | 1.15230      | 0.2245  |
| 3      | 5.436         | BB   | 0.0670      | 11.32366     | 2.49043      | 0.4882  |
| 4      | 5.659         | BB   | 0.0670      | 6.06941      | 1.38963      | 0.2617  |
| 5      | 6.800         | BB   | 0.0645      | 2168.57202   | 521.86249    | 93.4907 |
| 6      | 8.858         | BB   | 0.0821      | 7.22017      | 1.40258      | 0.3113  |
| 7      | 10.396        | BB   | 0.0749      | 5.05013      | 1.03606      | 0.2177  |
| 8      | 16.887        | BV R | 0.0397      | 96.88270     | 40.85967     | 4.1768  |
| 9      | 16.953        | VBAE | 0.0434      | 6.93944      | 2.66257      | 0.2992  |

Totals : 2319.55813 573.90349

Signal 2: DAD1 B, Sig=254,4 Ref=360,100

| Peak # | RetTime [min] | Type | Width [min] | Area [mAU*s] | Height [mAU] | Area %  |
|--------|---------------|------|-------------|--------------|--------------|---------|
| 1      | 6.799         | BB   | 0.0642      | 145.36461    | 35.20002     | 91.7995 |
| 2      | 16.883        | BV   | 0.0396      | 7.82808      | 3.30787      | 4.9435  |
| 3      | 16.943        | VBA  | 0.0425      | 5.15743      | 1.85331      | 3.2570  |

Totals : 158.35012 40.36121

Signal 3: DAD1 C, Sig=274,4 Ref=360,100

| Peak # | RetTime [min] | Type | Width [min] | Area [mAU*s] | Height [mAU] | Area %  |
|--------|---------------|------|-------------|--------------|--------------|---------|
| 1      | 6.800         | BB   | 0.0643      | 618.88312    | 149.54994    | 98.1144 |
| 2      | 16.886        | BV   | 0.0411      | 6.52207      | 2.61409      | 1.0340  |
| 3      | 16.942        | VBA  | 0.0439      | 5.37177      | 1.84815      | 0.8516  |

Totals : 630.77696 154.01217

=====  
\*\*\* End of Report \*\*\*

Sample Name: LC0534

**Compound 22c**

```
=====
Acq. Operator   : SYSTEM                      Seq. Line :   44
Acq. Instrument : CDD                        Location  :   Pl-E-08
Injection Date  : 4/16/2016 5:36:33 AM        Inj       :    1
                                           Inj Volume: 10.000 µl
Method          : C:\Chem32\1\Data\Sir2 Purity test MeCN_rui 2016-04-15 16-44-07\Sir2 purity_
                  30-100%MeCN.M (Sequence Method)
Last changed    : 4/15/2016 4:44:07 PM by SYSTEM
Method Info     : test
=====
```

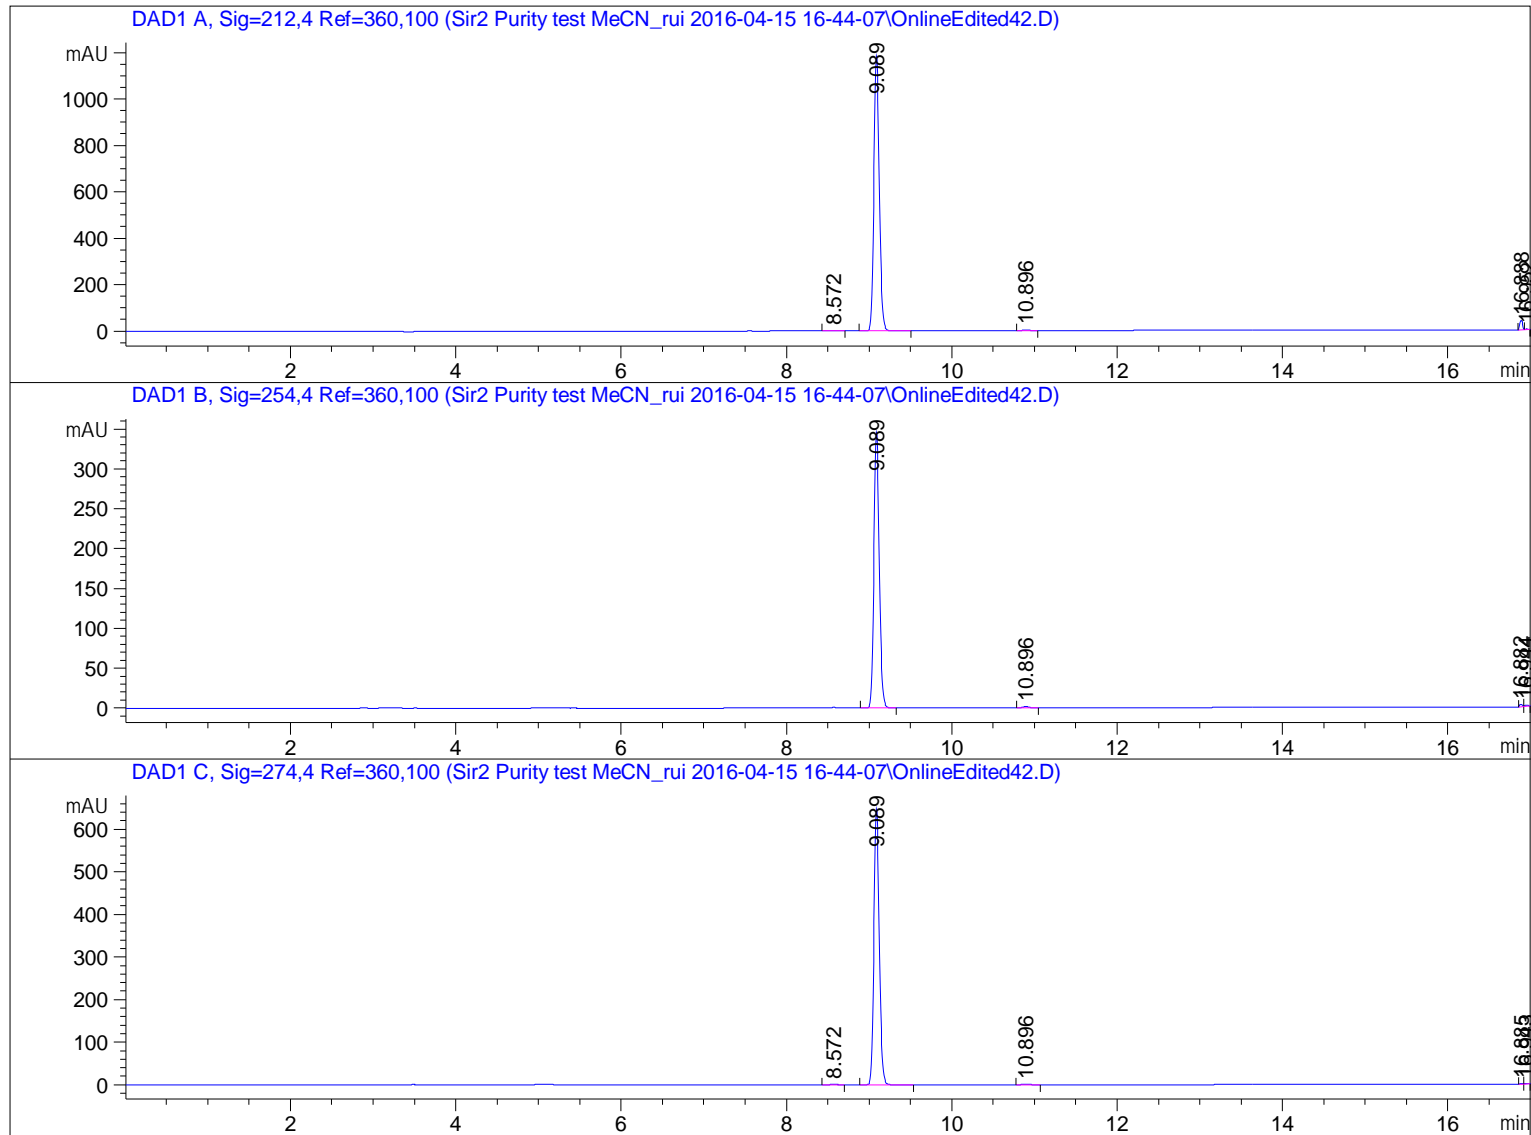

=====  
**Area Percent Report**  
=====

```
Sorted By      :      Signal
Multiplier     :      1.0000
Dilution       :      1.0000
Use Multiplier & Dilution Factor with ISTDs
```

Signal 1: DAD1 A, Sig=212,4 Ref=360,100

| Peak # | RetTime [min] | Type | Width [min] | Area [mAU*s] | Height [mAU] | Area %  |
|--------|---------------|------|-------------|--------------|--------------|---------|
| 1      | 8.572         | BB   | 0.0683      | 8.76043      | 1.95366      | 0.1595  |
| 2      | 9.089         | BB   | 0.0707      | 5364.50439   | 1187.35706   | 97.6449 |
| 3      | 10.896        | BB   | 0.0789      | 19.68862     | 3.89664      | 0.3584  |
| 4      | 16.888        | BV R | 0.0397      | 94.65457     | 39.87001     | 1.7229  |
| 5      | 16.952        | VBAE | 0.0401      | 6.28480      | 2.43528      | 0.1144  |

Totals : 5493.89281 1235.51264

Signal 2: DAD1 B, Sig=254,4 Ref=360,100

| Peak # | RetTime [min] | Type | Width [min] | Area [mAU*s] | Height [mAU] | Area %  |
|--------|---------------|------|-------------|--------------|--------------|---------|
| 1      | 9.089         | BB   | 0.0683      | 1554.30615   | 346.53513    | 98.7372 |
| 2      | 10.896        | BB   | 0.0782      | 7.43809      | 1.49114      | 0.4725  |
| 3      | 16.882        | BV   | 0.0364      | 7.31227      | 3.23424      | 0.4645  |
| 4      | 16.944        | VBA  | 0.0427      | 5.12803      | 1.83168      | 0.3258  |

Totals : 1574.18454 353.09219

Signal 3: DAD1 C, Sig=274,4 Ref=360,100

| Peak # | RetTime [min] | Type | Width [min] | Area [mAU*s] | Height [mAU] | Area %  |
|--------|---------------|------|-------------|--------------|--------------|---------|
| 1      | 8.572         | BB   | 0.0668      | 8.24654      | 1.89257      | 0.2802  |
| 2      | 9.089         | BB   | 0.0684      | 2914.98340   | 649.47290    | 99.0565 |
| 3      | 10.896        | BB   | 0.0792      | 8.10738      | 1.59682      | 0.2755  |
| 4      | 16.885        | BV   | 0.0408      | 6.10097      | 2.46982      | 0.2073  |
| 5      | 16.943        | VBA  | 0.0439      | 5.30889      | 1.82491      | 0.1804  |

Totals : 2942.74717 657.25702

\*\*\* End of Report \*\*\*



Sample Name: LC-0420

**Compound 15a**

```
=====
Acq. Operator   : SYSTEM                      Seq. Line :   13
Acq. Instrument : CDD                        Location  :   P1-B-05
Injection Date  : 7/20/2016 9:16:08 PM        Inj       :    1
                                           Inj Volume: 5.000 µl
Different Inj Volume from Sample Entry! Actual Inj Volume : 10.000 µl
Method          : C:\Chem32\1\Data\RD SIRT2 2016-07-20 16-41-09\RD VCP Methanol 40-100.M (
                  Sequence Method)
Last changed    : 7/20/2016 4:41:10 PM by SYSTEM
Method Info     : test
=====
```

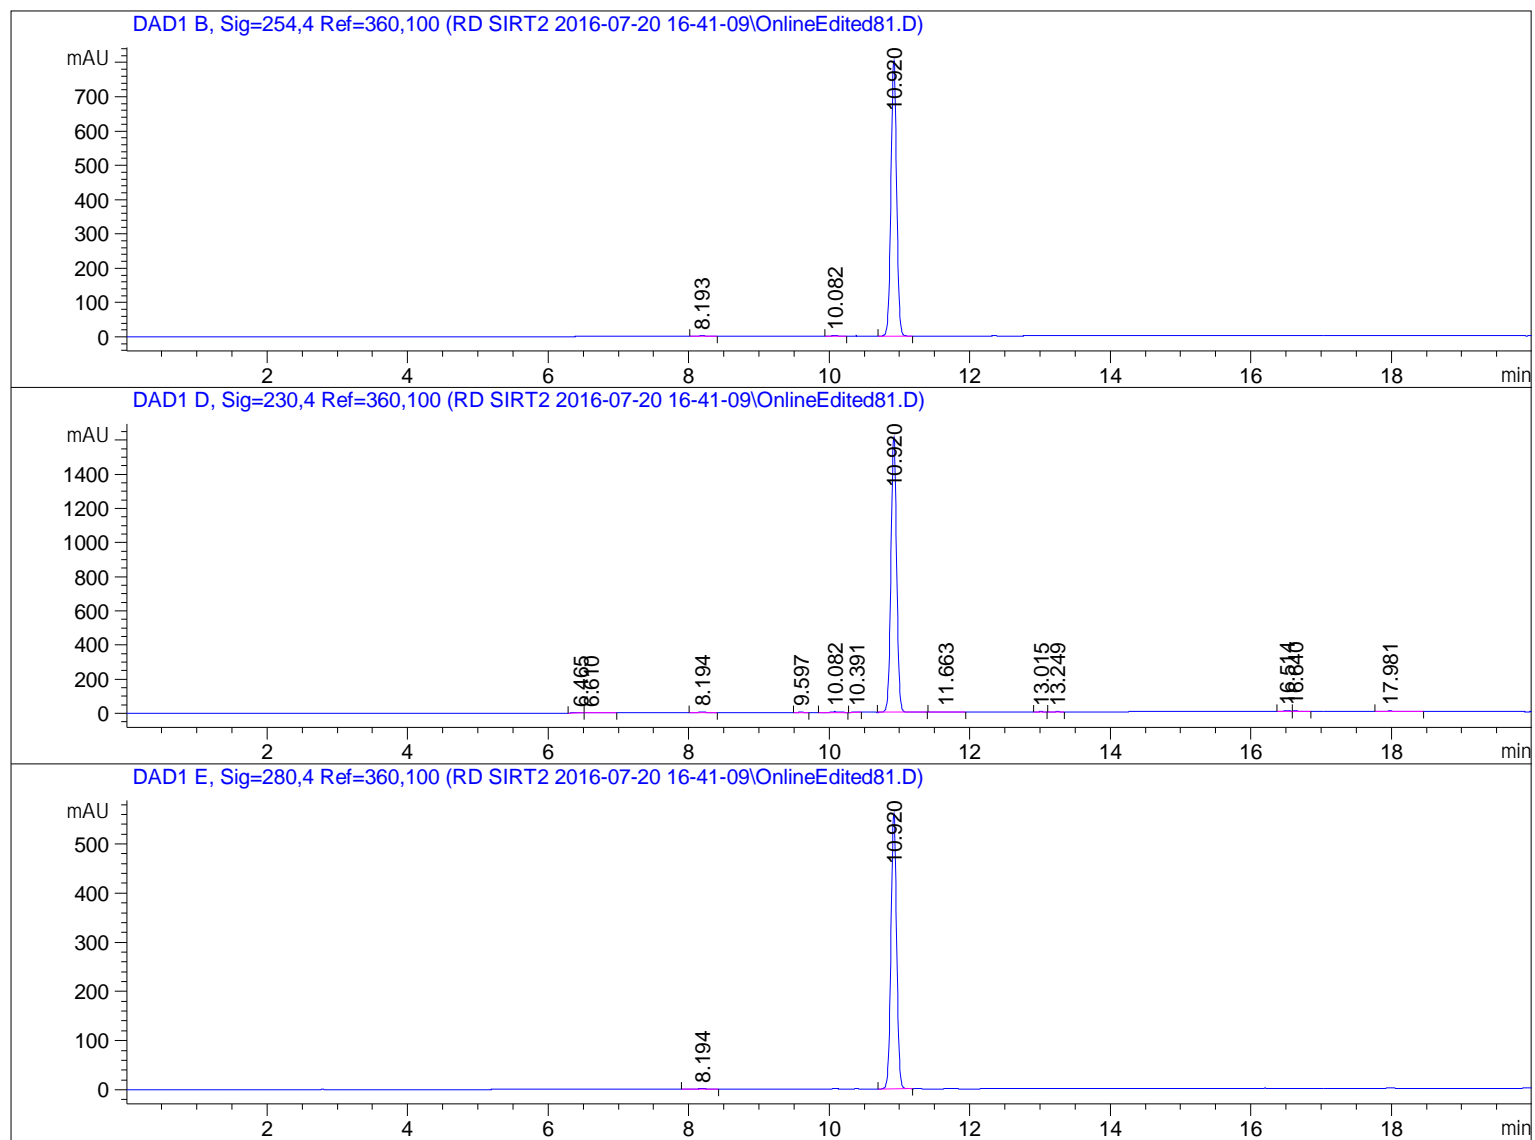

```
=====
                          Area Percent Report
=====
```

```
Sorted By      :      Signal
Multiplier     :      1.0000
Dilution       :      1.0000
Use Multiplier & Dilution Factor with ISTDs
```

Signal 1: DAD1 B, Sig=254,4 Ref=360,100

| Peak # | RetTime [min] | Type | Width [min] | Area [mAU*s] | Height [mAU] | Area %  |
|--------|---------------|------|-------------|--------------|--------------|---------|
| 1      | 8.193         | BB   | 0.1333      | 16.45846     | 1.93399      | 0.3623  |
| 2      | 10.082        | BB   | 0.0909      | 12.70294     | 2.14944      | 0.2796  |
| 3      | 10.920        | BB   | 0.0876      | 4513.63623   | 802.68030    | 99.3581 |

Totals : 4542.79764 806.76373

Signal 2: DAD1 D, Sig=230,4 Ref=360,100

| Peak # | RetTime [min] | Type | Width [min] | Area [mAU*s] | Height [mAU] | Area %  |
|--------|---------------|------|-------------|--------------|--------------|---------|
| 1      | 6.465         | BV   | 0.1063      | 11.40138     | 1.61681      | 0.1227  |
| 2      | 6.610         | VB   | 0.1375      | 25.43890     | 2.61543      | 0.2737  |
| 3      | 8.194         | BB   | 0.1337      | 33.99773     | 3.97887      | 0.3658  |
| 4      | 9.597         | BB   | 0.0800      | 7.47443      | 1.45241      | 0.0804  |
| 5      | 10.082        | BB   | 0.0949      | 27.36769     | 4.37919      | 0.2944  |
| 6      | 10.391        | BV   | 0.0794      | 10.41096     | 1.97964      | 0.1120  |
| 7      | 10.920        | BV R | 0.0879      | 9099.55176   | 1611.47351   | 97.9020 |
| 8      | 11.663        | BB   | 0.1141      | 14.82964     | 1.83820      | 0.1596  |
| 9      | 13.015        | BB   | 0.0813      | 8.72295      | 1.71700      | 0.0939  |
| 10     | 13.249        | BB   | 0.0806      | 6.95167      | 1.33881      | 0.0748  |
| 11     | 16.514        | BV   | 0.0917      | 17.31413     | 2.81722      | 0.1863  |
| 12     | 16.640        | VV   | 0.0987      | 14.22445     | 2.05569      | 0.1530  |
| 13     | 17.981        | BB   | 0.1122      | 16.86211     | 2.18123      | 0.1814  |

Totals : 9294.54777 1639.44400

Signal 3: DAD1 E, Sig=280,4 Ref=360,100

| Peak # | RetTime [min] | Type | Width [min] | Area [mAU*s] | Height [mAU] | Area %  |
|--------|---------------|------|-------------|--------------|--------------|---------|
| 1      | 8.194         | BB   | 0.1380      | 10.83641     | 1.21591      | 0.3433  |
| 2      | 10.920        | BB   | 0.0876      | 3145.68262   | 559.62396    | 99.6567 |

Totals : 3156.51903 560.83987

\*\*\* End of Report \*\*\*

Sample Name: LC-0511

**Compound 15b**

```
=====
Acq. Operator   : SYSTEM                      Seq. Line :   17
Acq. Instrument : CDD                        Location  :   Pl-B-09
Injection Date  : 7/20/2016 10:47:32 PM      Inj       :    1
                                           Inj Volume: 5.000 µl
Different Inj Volume from Sample Entry! Actual Inj Volume : 10.000 µl
Method          : C:\Chem32\1\Data\RD SIRT2 2016-07-20 16-41-09\RD VCP Methanol 40-100.M (
                  Sequence Method)
Last changed    : 7/20/2016 4:41:10 PM by SYSTEM
Method Info     : test
=====
```

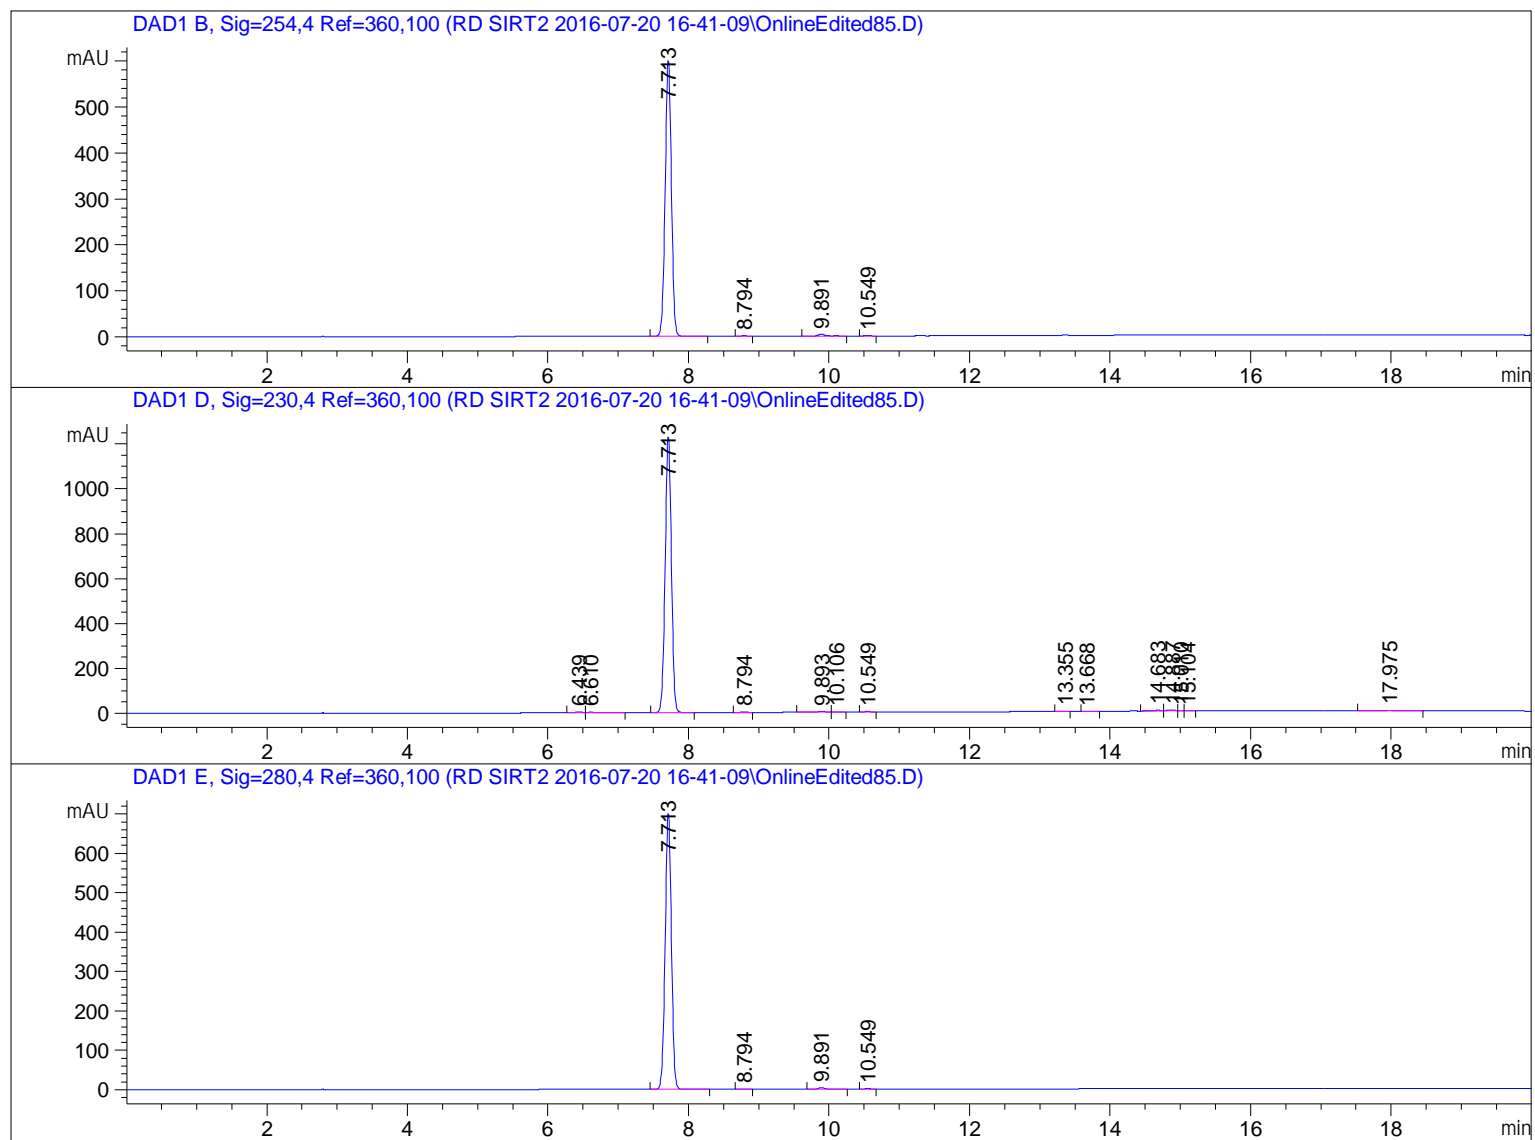

=====  
Area Percent Report  
=====

```
Sorted By      :      Signal
Multiplier     :      1.0000
Dilution       :      1.0000
Use Multiplier & Dilution Factor with ISTDs
```

Signal 1: DAD1 B, Sig=254,4 Ref=360,100

| Peak # | RetTime [min] | Type | Width [min] | Area [mAU*s] | Height [mAU] | Area %  |
|--------|---------------|------|-------------|--------------|--------------|---------|
| 1      | 7.713         | BB   | 0.0954      | 3672.45776   | 600.28931    | 98.8033 |
| 2      | 8.794         | BB   | 0.0924      | 6.48451      | 1.10619      | 0.1745  |
| 3      | 9.891         | BV R | 0.1081      | 31.98347     | 4.33566      | 0.8605  |
| 4      | 10.549        | BB   | 0.0859      | 6.01273      | 1.09859      | 0.1618  |

Totals : 3716.93847 606.82975

Signal 2: DAD1 D, Sig=230,4 Ref=360,100

| Peak # | RetTime [min] | Type | Width [min] | Area [mAU*s] | Height [mAU] | Area %  |
|--------|---------------|------|-------------|--------------|--------------|---------|
| 1      | 6.439         | BV   | 0.1095      | 29.11071     | 4.06732      | 0.3742  |
| 2      | 6.610         | VB   | 0.1483      | 28.07322     | 2.67843      | 0.3608  |
| 3      | 7.713         | BB   | 0.0956      | 7540.19092   | 1229.24573   | 96.9120 |
| 4      | 8.794         | BB   | 0.0916      | 12.91389     | 2.22866      | 0.1660  |
| 5      | 9.893         | BV   | 0.1100      | 31.86764     | 4.22698      | 0.4096  |
| 6      | 10.106        | VB   | 0.0950      | 12.03650     | 1.92238      | 0.1547  |
| 7      | 10.549        | BB   | 0.0856      | 13.79663     | 2.52960      | 0.1773  |
| 8      | 13.355        | BB   | 0.0949      | 8.88917      | 1.50563      | 0.1143  |
| 9      | 13.668        | BB   | 0.0807      | 6.69069      | 1.28567      | 0.0860  |
| 10     | 14.683        | VV R | 0.0844      | 23.69258     | 4.16170      | 0.3045  |
| 11     | 14.887        | VV   | 0.1025      | 38.59135     | 5.08497      | 0.4960  |
| 12     | 15.010        | VV   | 0.0632      | 7.26466      | 1.72143      | 0.0934  |
| 13     | 15.104        | VB   | 0.0695      | 9.19046      | 2.00427      | 0.1181  |
| 14     | 17.975        | BB   | 0.1179      | 18.14151     | 2.25320      | 0.2332  |

Totals : 7780.44993 1264.91597

Signal 3: DAD1 E, Sig=280,4 Ref=360,100

| Peak # | RetTime [min] | Type | Width [min] | Area [mAU*s] | Height [mAU] | Area %  |
|--------|---------------|------|-------------|--------------|--------------|---------|
| 1      | 7.713         | BB   | 0.0953      | 4285.66016   | 700.76459    | 99.0057 |
| 2      | 8.794         | BB   | 0.0919      | 6.03008      | 1.03662      | 0.1393  |
| 3      | 9.891         | BV R | 0.1115      | 30.03063     | 3.91259      | 0.6938  |
| 4      | 10.549        | BB   | 0.0853      | 6.97943      | 1.28651      | 0.1612  |

Totals : 4328.70030 707.00031

\*\*\* End of Report \*\*\*

Sample Name: LC-0424

**Compound 16a**

```
=====
Acq. Operator   : SYSTEM                      Seq. Line :    2
Acq. Instrument : CDD                        Location  : P1-F-02
Injection Date  : 7/21/2016 11:07:02 AM      Inj       :    1
                                           Inj Volume: 5.000 µl
Different Inj Volume from Sample Entry! Actual Inj Volume : 10.000 µl
Method          : C:\Chem32\1\Data\RD SIRT2 2016-07-21 10-43-19\RD VCP Methanol 40-100.M (
                  Sequence Method)
Last changed    : 7/21/2016 10:43:19 AM by SYSTEM
Method Info     : test
=====
```

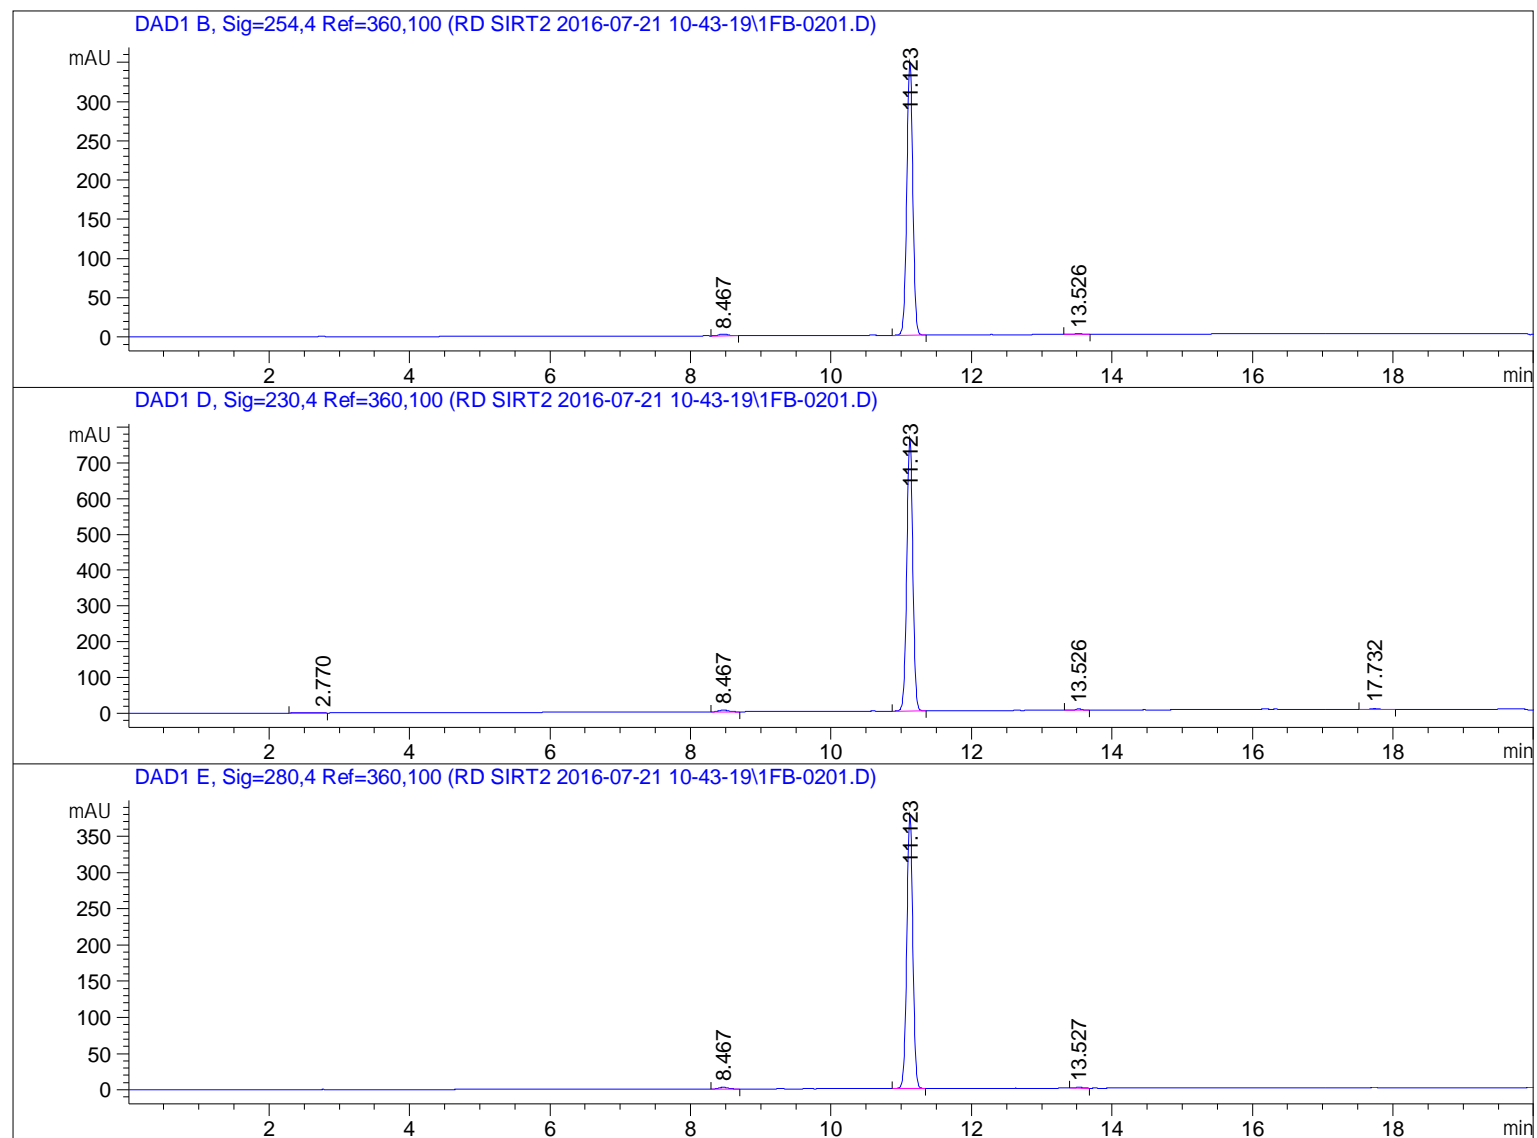

=====  
**Area Percent Report**  
=====

```
Sorted By      :      Signal
Multiplier     :      1.0000
Dilution       :      1.0000
Use Multiplier & Dilution Factor with ISTDs
```

Signal 1: DAD1 B, Sig=254,4 Ref=360,100

| Peak # | RetTime [min] | Type | Width [min] | Area [mAU*s] | Height [mAU] | Area %  |
|--------|---------------|------|-------------|--------------|--------------|---------|
| 1      | 8.467         | BB   | 0.1404      | 21.30717     | 2.38215      | 1.0071  |
| 2      | 11.123        | BB   | 0.0935      | 2085.70117   | 350.20624    | 98.5832 |
| 3      | 13.526        | BB   | 0.0959      | 8.66756      | 1.36777      | 0.4097  |

Totals : 2115.67590 353.95615

Signal 2: DAD1 D, Sig=230,4 Ref=360,100

| Peak # | RetTime [min] | Type | Width [min] | Area [mAU*s] | Height [mAU] | Area %  |
|--------|---------------|------|-------------|--------------|--------------|---------|
| 1      | 2.770         | BB   | 0.1110      | 9.60093      | 1.15483      | 0.2061  |
| 2      | 8.467         | BB   | 0.1406      | 43.64967     | 4.86856      | 0.9371  |
| 3      | 11.123        | BB   | 0.0936      | 4565.21387   | 765.50922    | 98.0070 |
| 4      | 13.526        | BB   | 0.0971      | 23.59867     | 3.66372      | 0.5066  |
| 5      | 17.732        | BB   | 0.1034      | 15.98425     | 2.34906      | 0.3432  |

Totals : 4658.04739 777.54538

Signal 3: DAD1 E, Sig=280,4 Ref=360,100

| Peak # | RetTime [min] | Type | Width [min] | Area [mAU*s] | Height [mAU] | Area %  |
|--------|---------------|------|-------------|--------------|--------------|---------|
| 1      | 8.467         | BB   | 0.1395      | 21.33203     | 2.35860      | 0.9319  |
| 2      | 11.123        | BB   | 0.0935      | 2259.36499   | 379.45120    | 98.6963 |
| 3      | 13.527        | BB   | 0.0902      | 8.51135      | 1.45588      | 0.3718  |

Totals : 2289.20837 383.26569

\*\*\* End of Report \*\*\*

Sample Name: LC-0524

**Compound 16b**

```
=====
Acq. Operator   : SYSTEM                      Seq. Line :   23
Acq. Instrument : CDD                        Location  : P1-C-06
Injection Date  : 7/21/2016 1:04:34 AM        Inj       :    1
                                           Inj Volume: 5.000 µl
Different Inj Volume from Sample Entry! Actual Inj Volume : 10.000 µl
Method          : C:\Chem32\1\Data\RD SIRT2 2016-07-20 16-41-09\RD VCP Methanol 40-100.M (
                  Sequence Method)
Last changed    : 7/20/2016 4:41:10 PM by SYSTEM
Method Info     : test
=====
```

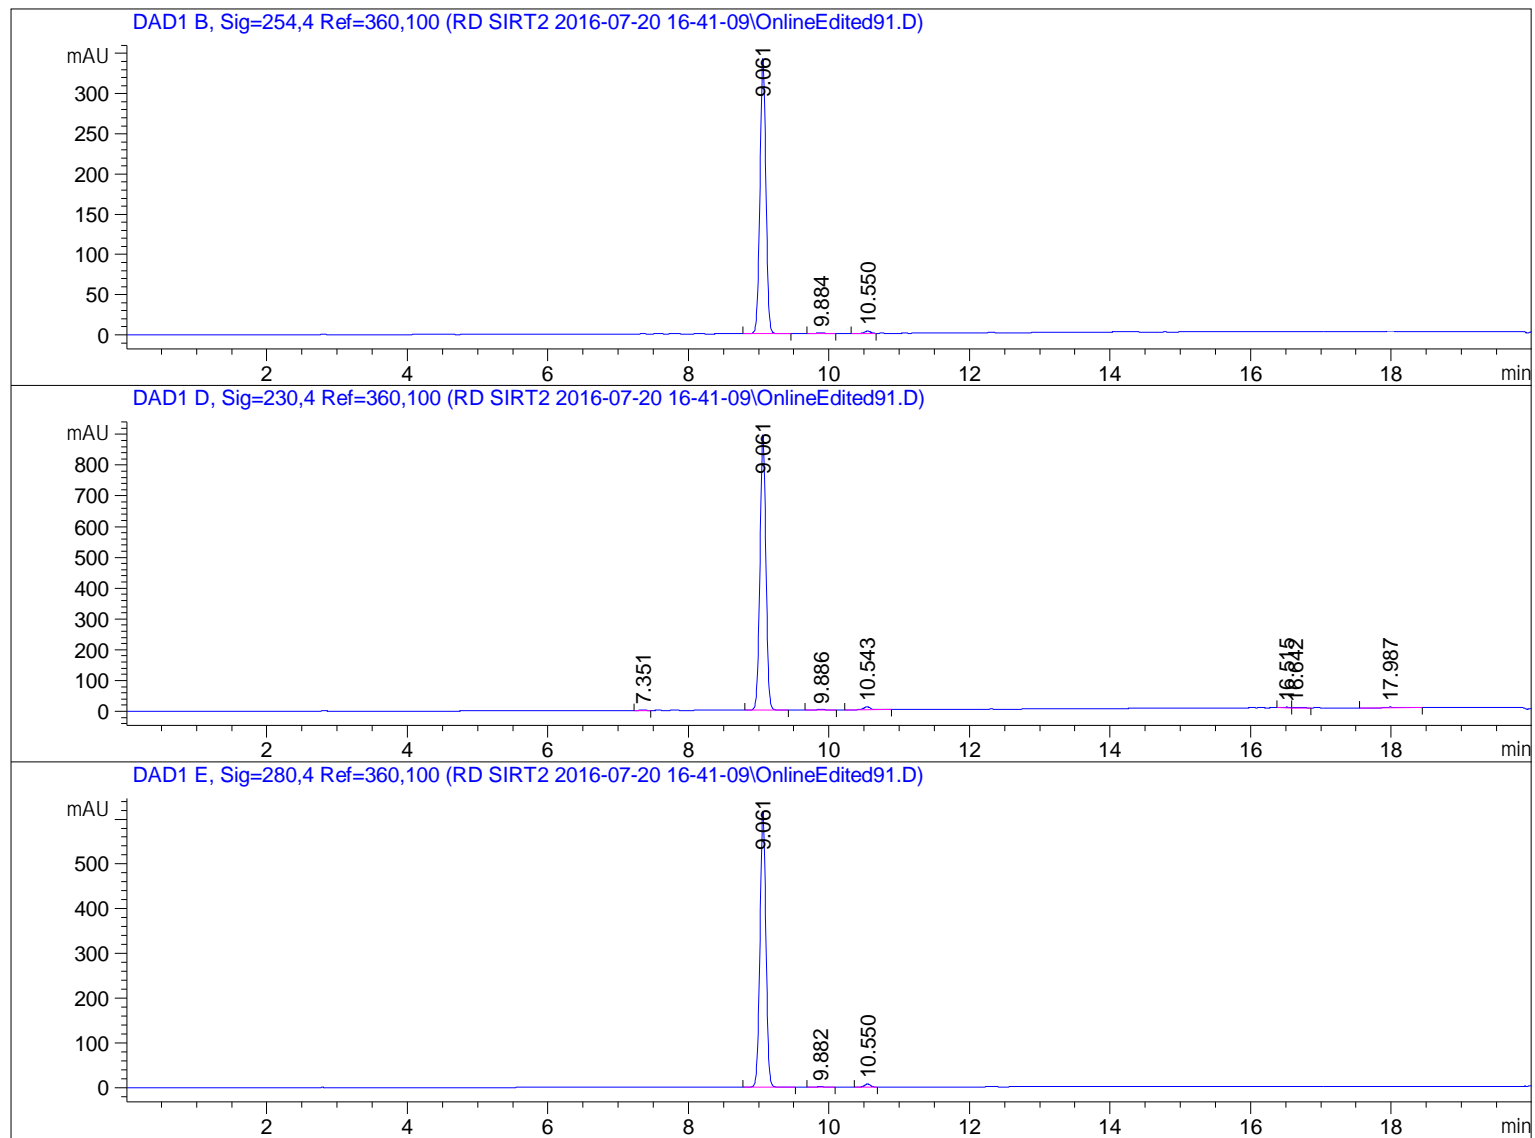

=====  
Area Percent Report  
=====

```
Sorted By      :      Signal
Multiplier     :      1.0000
Dilution       :      1.0000
Use Multiplier & Dilution Factor with ISTDs
```

Signal 1: DAD1 B, Sig=254,4 Ref=360,100

| Peak # | RetTime [min] | Type | Width [min] | Area [mAU*s] | Height [mAU] | Area %  |
|--------|---------------|------|-------------|--------------|--------------|---------|
| 1      | 9.061         | BB   | 0.0924      | 2008.87170   | 342.66144    | 98.8092 |
| 2      | 9.884         | BB   | 0.1035      | 8.07362      | 1.15530      | 0.3971  |
| 3      | 10.550        | BB   | 0.0893      | 16.13533     | 2.79606      | 0.7936  |

Totals : 2033.08065 346.61279

Signal 2: DAD1 D, Sig=230,4 Ref=360,100

| Peak # | RetTime [min] | Type | Width [min] | Area [mAU*s] | Height [mAU] | Area %  |
|--------|---------------|------|-------------|--------------|--------------|---------|
| 1      | 7.351         | BV   | 0.0944      | 8.76639      | 1.45276      | 0.1630  |
| 2      | 9.061         | BB   | 0.0925      | 5254.30908   | 894.71814    | 97.7054 |
| 3      | 9.886         | BB   | 0.1074      | 8.46663      | 1.13033      | 0.1574  |
| 4      | 10.543        | BV R | 0.1053      | 64.34174     | 9.23222      | 1.1965  |
| 5      | 16.515        | BV   | 0.0940      | 13.16004     | 2.13342      | 0.2447  |
| 6      | 16.642        | VV   | 0.1017      | 10.83476     | 1.54647      | 0.2015  |
| 7      | 17.987        | BB   | 0.1142      | 17.82999     | 2.25551      | 0.3316  |

Totals : 5377.70863 912.46885

Signal 3: DAD1 E, Sig=280,4 Ref=360,100

| Peak # | RetTime [min] | Type | Width [min] | Area [mAU*s] | Height [mAU] | Area %  |
|--------|---------------|------|-------------|--------------|--------------|---------|
| 1      | 9.061         | BB   | 0.0924      | 3614.99927   | 616.68585    | 98.7346 |
| 2      | 9.882         | BB   | 0.1117      | 8.33632      | 1.08426      | 0.2277  |
| 3      | 10.550        | BB   | 0.0892      | 37.99265     | 6.59852      | 1.0377  |

Totals : 3661.32824 624.36863

\*\*\* End of Report \*\*\*



Sample Name: LC-0480

**Compound 17**

```
=====
Acq. Operator   : SYSTEM                      Seq. Line :   25
Acq. Instrument : CDD                        Location  : P1-C-08
Injection Date  : 7/21/2016 1:50:16 AM      Inj       :    1
                                           Inj Volume: 5.000 µl
Different Inj Volume from Sample Entry! Actual Inj Volume : 10.000 µl
Method          : C:\Chem32\1\Data\RD SIRT2 2016-07-20 16-41-09\RD VCP Methanol 40-100.M (
                  Sequence Method)
Last changed    : 7/20/2016 4:41:10 PM by SYSTEM
Method Info     : test
=====
```

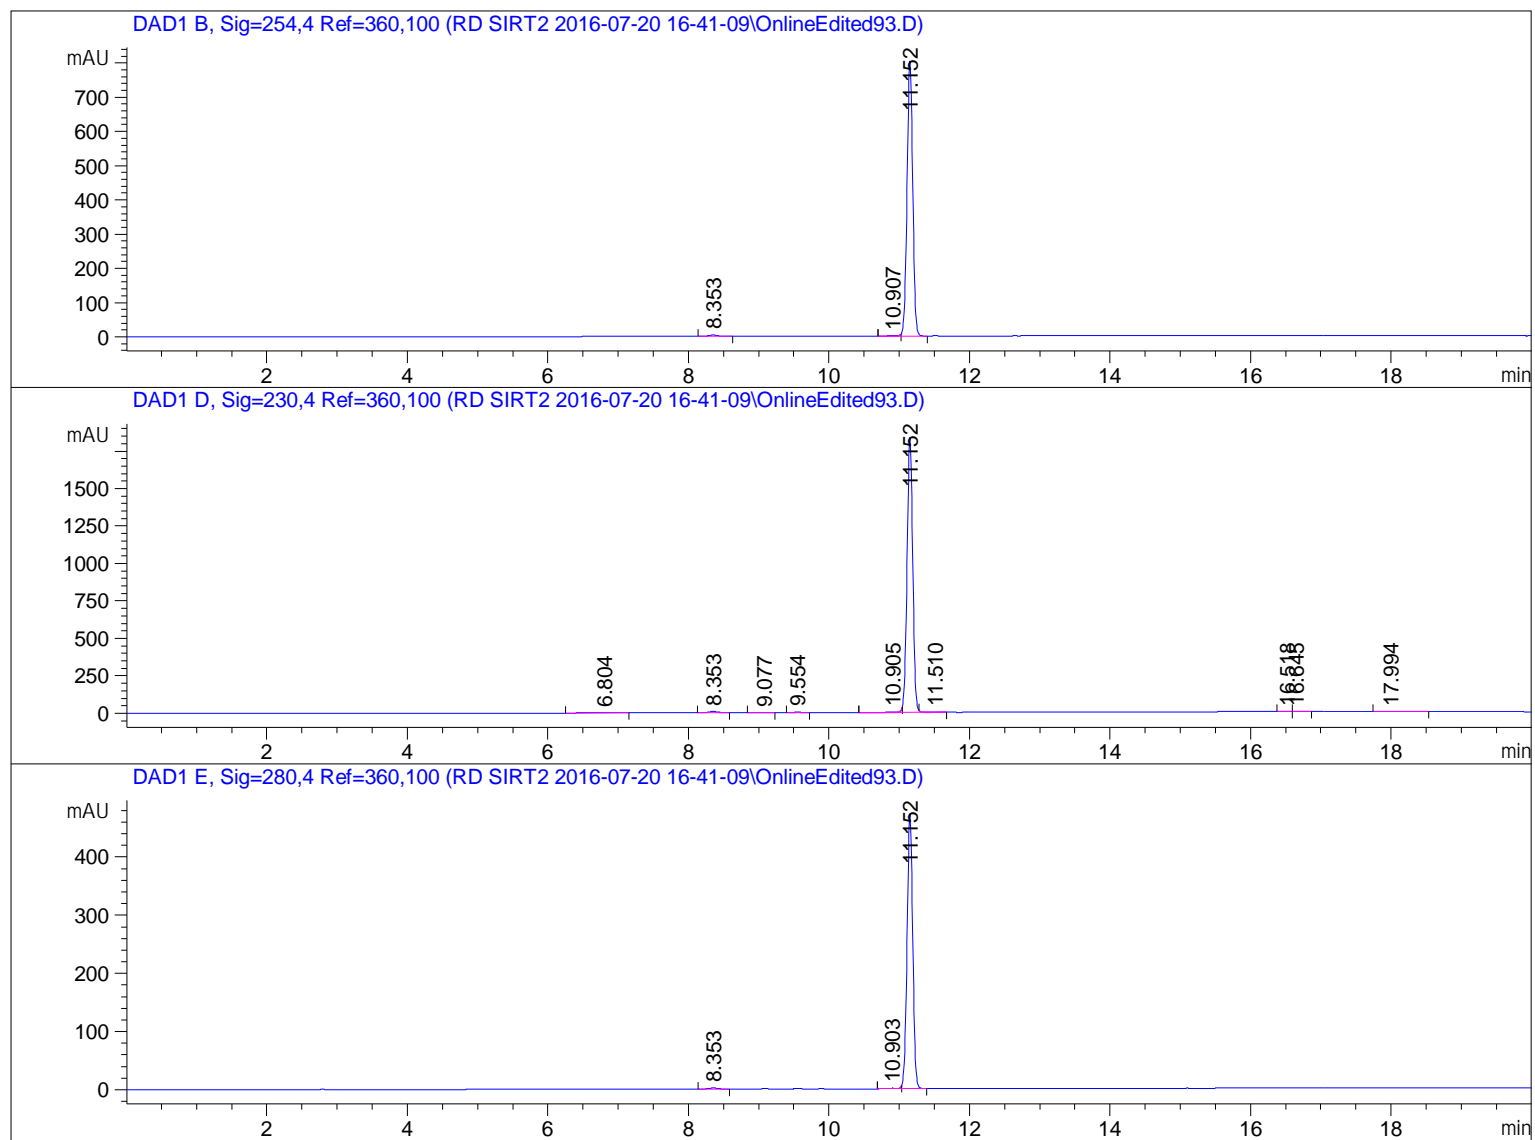

=====  
Area Percent Report  
=====

```
Sorted By      :      Signal
Multiplier     :      1.0000
Dilution       :      1.0000
Use Multiplier & Dilution Factor with ISTDs
```

Signal 1: DAD1 B, Sig=254,4 Ref=360,100

| Peak # | RetTime [min] | Type | Width [min] | Area [mAU*s] | Height [mAU] | Area %  |
|--------|---------------|------|-------------|--------------|--------------|---------|
| 1      | 8.353         | BB   | 0.1447      | 35.86850     | 3.84946      | 0.7873  |
| 2      | 10.907        | BV E | 0.1228      | 15.00904     | 1.80899      | 0.3294  |
| 3      | 11.152        | VB R | 0.0874      | 4504.97217   | 804.01068    | 98.8832 |

Totals : 4555.84971 809.66913

Signal 2: DAD1 D, Sig=230,4 Ref=360,100

| Peak # | RetTime [min] | Type | Width [min] | Area [mAU*s] | Height [mAU] | Area %  |
|--------|---------------|------|-------------|--------------|--------------|---------|
| 1      | 6.804         | BB   | 0.3358      | 28.12843     | 1.05258      | 0.2665  |
| 2      | 8.353         | BB   | 0.1461      | 82.78275     | 8.93699      | 0.7843  |
| 3      | 9.077         | BB   | 0.1077      | 13.94524     | 1.94402      | 0.1321  |
| 4      | 9.554         | BB   | 0.1123      | 15.12032     | 2.09304      | 0.1432  |
| 5      | 10.905        | BV E | 0.1435      | 32.72190     | 3.30415      | 0.3100  |
| 6      | 11.152        | VV R | 0.0876      | 1.03274e4    | 1836.41357   | 97.8390 |
| 7      | 11.510        | VB E | 0.1344      | 16.50437     | 1.74417      | 0.1564  |
| 8      | 16.518        | BV   | 0.0942      | 11.89883     | 1.92251      | 0.1127  |
| 9      | 16.645        | VV   | 0.0980      | 9.33234      | 1.36126      | 0.0884  |
| 10     | 17.994        | BB   | 0.1152      | 17.67356     | 2.26096      | 0.1674  |

Totals : 1.05555e4 1861.03326

Signal 3: DAD1 E, Sig=280,4 Ref=360,100

| Peak # | RetTime [min] | Type | Width [min] | Area [mAU*s] | Height [mAU] | Area %  |
|--------|---------------|------|-------------|--------------|--------------|---------|
| 1      | 8.353         | BB   | 0.1446      | 17.53759     | 1.88356      | 0.6567  |
| 2      | 10.903        | BV E | 0.1290      | 8.74528      | 1.01026      | 0.3275  |
| 3      | 11.152        | VB R | 0.0873      | 2644.43335   | 472.40259    | 99.0159 |

Totals : 2670.71623 475.29641

\*\*\* End of Report \*\*\*

Sample Name: LC-0478

**Compound 18**

```
=====
Acq. Operator   : SYSTEM                      Seq. Line :   29
Acq. Instrument : CDD                        Location  :   Pl-D-03
Injection Date  : 7/21/2016 3:21:37 AM        Inj       :    1
                                           Inj Volume: 5.000 µl
Different Inj Volume from Sample Entry! Actual Inj Volume : 10.000 µl
Method          : C:\Chem32\1\Data\RD SIRT2 2016-07-20 16-41-09\RD VCP Methanol 40-100.M (
                  Sequence Method)
Last changed    : 7/20/2016 4:41:10 PM by SYSTEM
Method Info     : test
=====
```

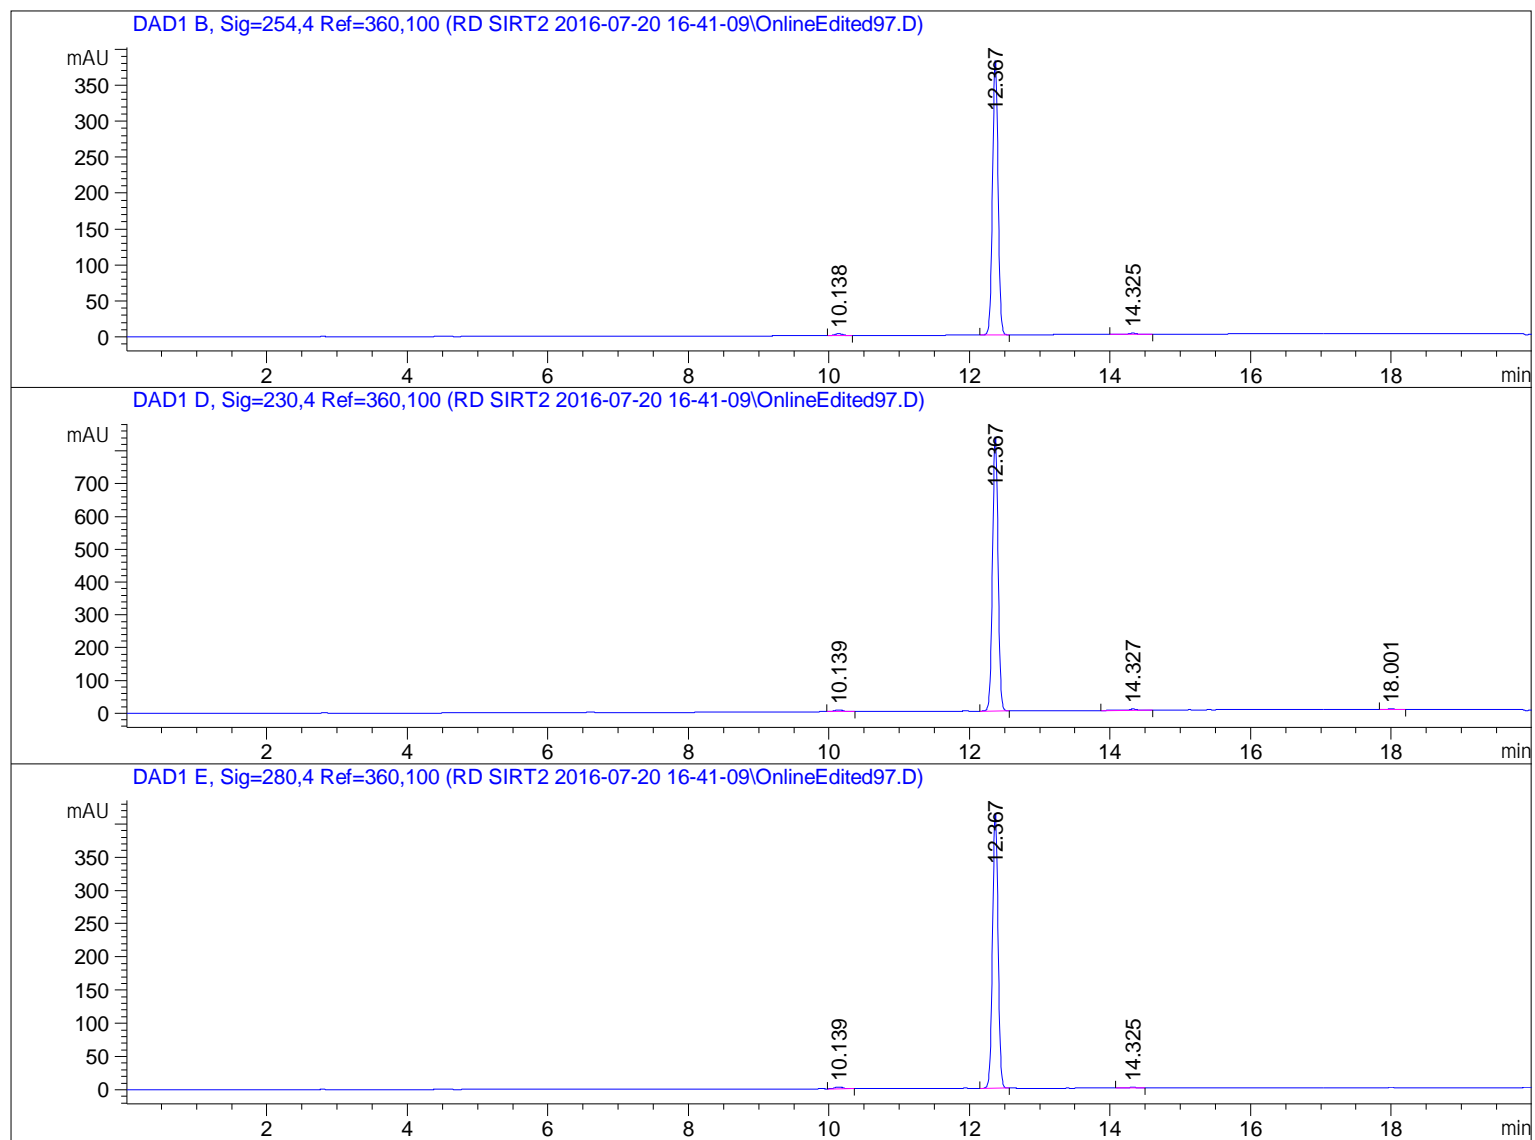

=====  
Area Percent Report  
=====

```
Sorted By      :      Signal
Multiplier     :      1.0000
Dilution       :      1.0000
Use Multiplier & Dilution Factor with ISTDs
```

Signal 1: DAD1 B, Sig=254,4 Ref=360,100

| Peak # | RetTime [min] | Type | Width [min] | Area [mAU*s] | Height [mAU] | Area %  |
|--------|---------------|------|-------------|--------------|--------------|---------|
| 1      | 10.138        | BB   | 0.1217      | 21.87729     | 2.78457      | 1.0299  |
| 2      | 12.367        | BB   | 0.0837      | 2086.56006   | 382.41519    | 98.2250 |
| 3      | 14.325        | BB   | 0.1275      | 15.82832     | 1.71855      | 0.7451  |

Totals : 2124.26567 386.91832

Signal 2: DAD1 D, Sig=230,4 Ref=360,100

| Peak # | RetTime [min] | Type | Width [min] | Area [mAU*s] | Height [mAU] | Area %  |
|--------|---------------|------|-------------|--------------|--------------|---------|
| 1      | 10.139        | BB   | 0.1231      | 44.62066     | 5.59220      | 0.9571  |
| 2      | 12.367        | BB   | 0.0837      | 4571.55225   | 836.88788    | 98.0604 |
| 3      | 14.327        | BV R | 0.1101      | 32.14836     | 4.16234      | 0.6896  |
| 4      | 18.001        | BB   | 0.0993      | 13.65461     | 2.11682      | 0.2929  |

Totals : 4661.97588 848.75923

Signal 3: DAD1 E, Sig=280,4 Ref=360,100

| Peak # | RetTime [min] | Type | Width [min] | Area [mAU*s] | Height [mAU] | Area %  |
|--------|---------------|------|-------------|--------------|--------------|---------|
| 1      | 10.139        | BB   | 0.1248      | 21.48736     | 2.70238      | 0.9374  |
| 2      | 12.367        | BB   | 0.0836      | 2260.22705   | 414.37790    | 98.6012 |
| 3      | 14.325        | BB   | 0.0971      | 10.57811     | 1.64299      | 0.4615  |

Totals : 2292.29252 418.72327

=====  
\*\*\* End of Report \*\*\*

Sample Name: LC-0533

## Compound 19a

```
=====
Acq. Operator   : SYSTEM                      Seq. Line :   33
Acq. Instrument : CDD                        Location  :   Pl-D-07
Injection Date  : 7/21/2016 4:52:58 AM       Inj       :    1
                                           Inj Volume: 5.000 µl
Different Inj Volume from Sample Entry! Actual Inj Volume : 10.000 µl
Method          : C:\Chem32\1\Data\RD SIRT2 2016-07-20 16-41-09\RD VCP Methanol 40-100.M (
                  Sequence Method)
Last changed    : 7/20/2016 4:41:10 PM by SYSTEM
Method Info     : test
=====
```

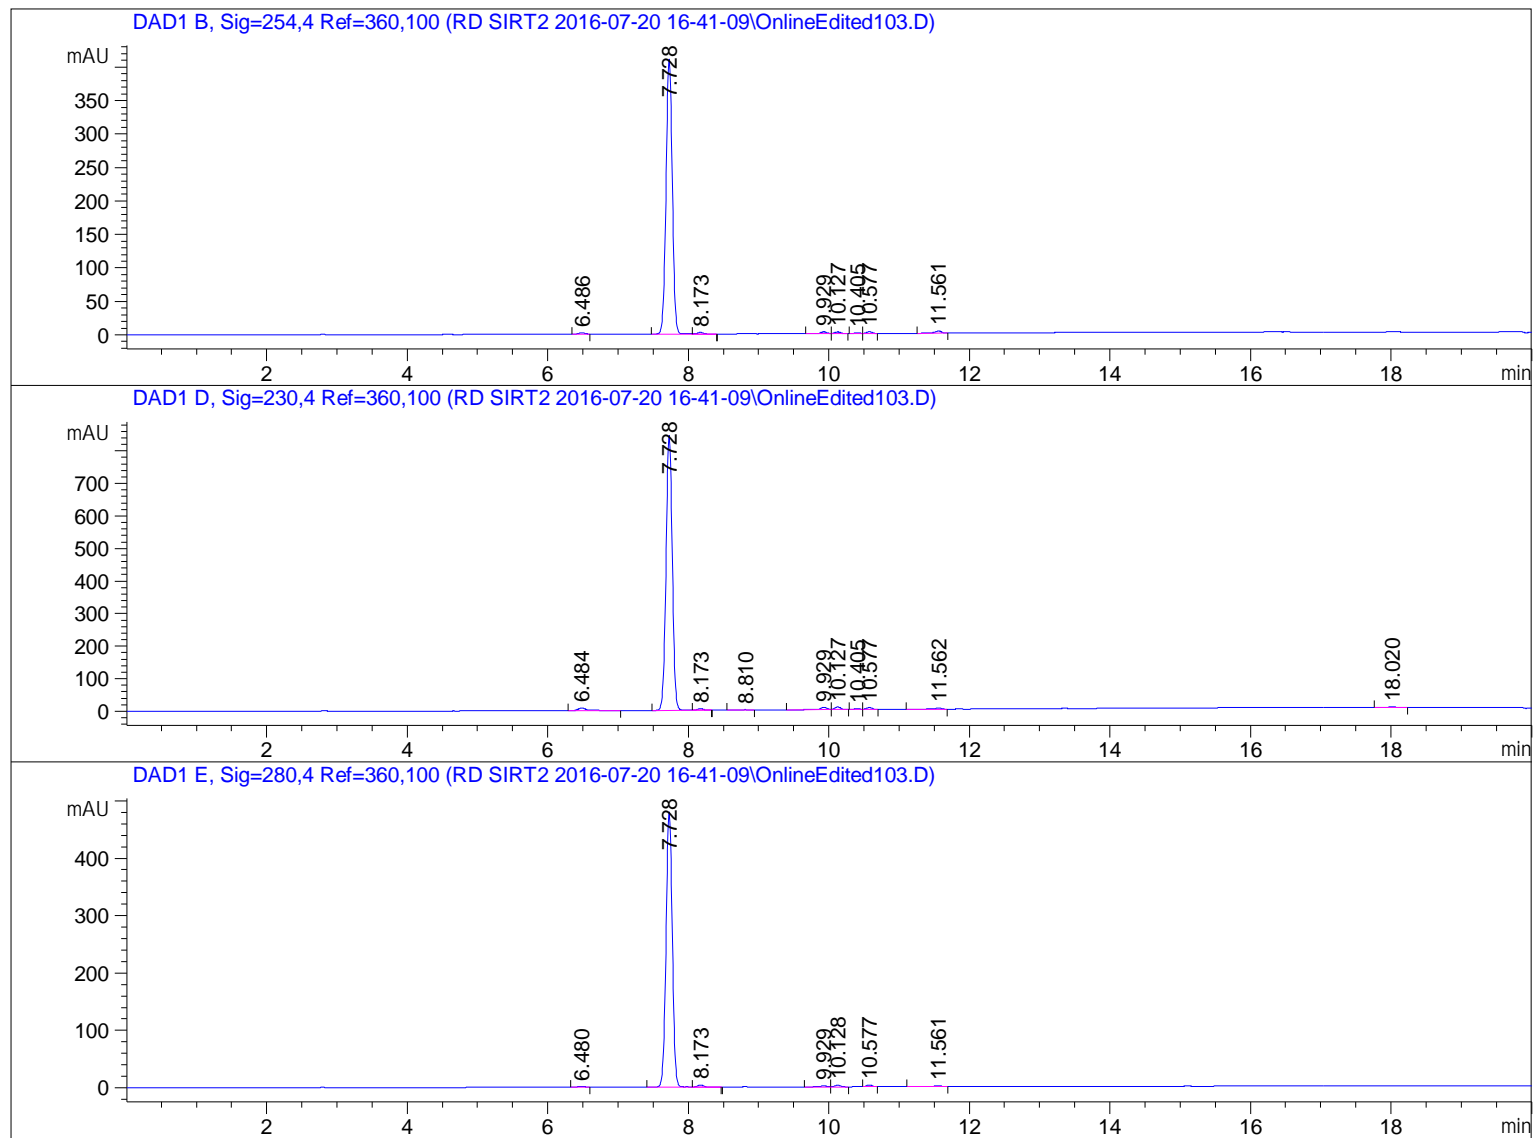

```
=====
Area Percent Report
=====
```

```
Sorted By      :      Signal
Multiplier     :      1.0000
Dilution       :      1.0000
Use Multiplier & Dilution Factor with ISTDs
```

Signal 1: DAD1 B, Sig=254,4 Ref=360,100

| Peak # | RetTime [min] | Type | Width [min] | Area [mAU*s] | Height [mAU] | Area %  |
|--------|---------------|------|-------------|--------------|--------------|---------|
| 1      | 6.486         | BB   | 0.1024      | 11.99584     | 1.88080      | 0.4556  |
| 2      | 7.728         | BV R | 0.0957      | 2528.10669   | 411.52805    | 96.0264 |
| 3      | 8.173         | VB E | 0.0903      | 13.36069     | 2.28385      | 0.5075  |
| 4      | 9.929         | BV   | 0.1004      | 18.06580     | 2.75793      | 0.6862  |
| 5      | 10.127        | VB   | 0.0894      | 14.78776     | 2.56105      | 0.5617  |
| 6      | 10.405        | BV   | 0.0903      | 6.68160      | 1.17548      | 0.2538  |
| 7      | 10.577        | VB   | 0.0899      | 15.07248     | 2.66767      | 0.5725  |
| 8      | 11.561        | BB   | 0.1122      | 24.64992     | 3.26016      | 0.9363  |

Totals : 2632.72078 428.11499

Signal 2: DAD1 D, Sig=230,4 Ref=360,100

| Peak # | RetTime [min] | Type | Width [min] | Area [mAU*s] | Height [mAU] | Area %  |
|--------|---------------|------|-------------|--------------|--------------|---------|
| 1      | 6.484         | BB   | 0.1388      | 79.07143     | 8.32814      | 1.4327  |
| 2      | 7.728         | BV R | 0.0958      | 5206.85645   | 845.69189    | 94.3404 |
| 3      | 8.173         | VB E | 0.0897      | 26.82261     | 4.62516      | 0.4860  |
| 4      | 8.810         | BB   | 0.1112      | 8.74934      | 1.17037      | 0.1585  |
| 5      | 9.929         | BV   | 0.1070      | 53.16010     | 7.29892      | 0.9632  |
| 6      | 10.127        | VB   | 0.0905      | 48.62735     | 8.27775      | 0.8811  |
| 7      | 10.405        | BV   | 0.0904      | 13.34979     | 2.34670      | 0.2419  |
| 8      | 10.577        | VB   | 0.0906      | 34.97092     | 6.12713      | 0.6336  |
| 9      | 11.562        | BB   | 0.1235      | 30.75161     | 3.60618      | 0.5572  |
| 10     | 18.020        | BB   | 0.0980      | 16.86144     | 2.58738      | 0.3055  |

Totals : 5519.22103 890.05962

Signal 3: DAD1 E, Sig=280,4 Ref=360,100

| Peak # | RetTime [min] | Type | Width [min] | Area [mAU*s] | Height [mAU] | Area %  |
|--------|---------------|------|-------------|--------------|--------------|---------|
| 1      | 6.480         | BB   | 0.1044      | 11.23754     | 1.71594      | 0.3691  |
| 2      | 7.728         | BV R | 0.0957      | 2950.54419   | 480.30511    | 96.9017 |
| 3      | 8.173         | VB E | 0.0901      | 20.63910     | 3.53737      | 0.6778  |
| 4      | 9.929         | BV   | 0.1043      | 13.56305     | 1.92282      | 0.4454  |
| 5      | 10.128        | VB   | 0.0900      | 16.89693     | 2.89942      | 0.5549  |
| 6      | 10.577        | VB   | 0.0904      | 17.68674     | 3.10874      | 0.5809  |
| 7      | 11.561        | BB   | 0.1138      | 14.31662     | 1.86088      | 0.4702  |

Totals : 3044.88416 495.35028

=====  
\*\*\* End of Report \*\*\*

Sample Name: LC-0540

**Compound 19b**

```
=====
Acq. Operator   : SYSTEM                      Seq. Line :   34
Acq. Instrument : CDD                        Location  :   P1-D-08
Injection Date  : 7/21/2016 5:15:49 AM      Inj       :    1
                                           Inj Volume: 5.000 µl
Different Inj Volume from Sample Entry! Actual Inj Volume : 10.000 µl
Method          : C:\Chem32\1\Data\RD SIRT2 2016-07-20 16-41-09\RD VCP Methanol 40-100.M (
                  Sequence Method)
Last changed    : 7/20/2016 4:41:10 PM by SYSTEM
Method Info     : test
=====
```

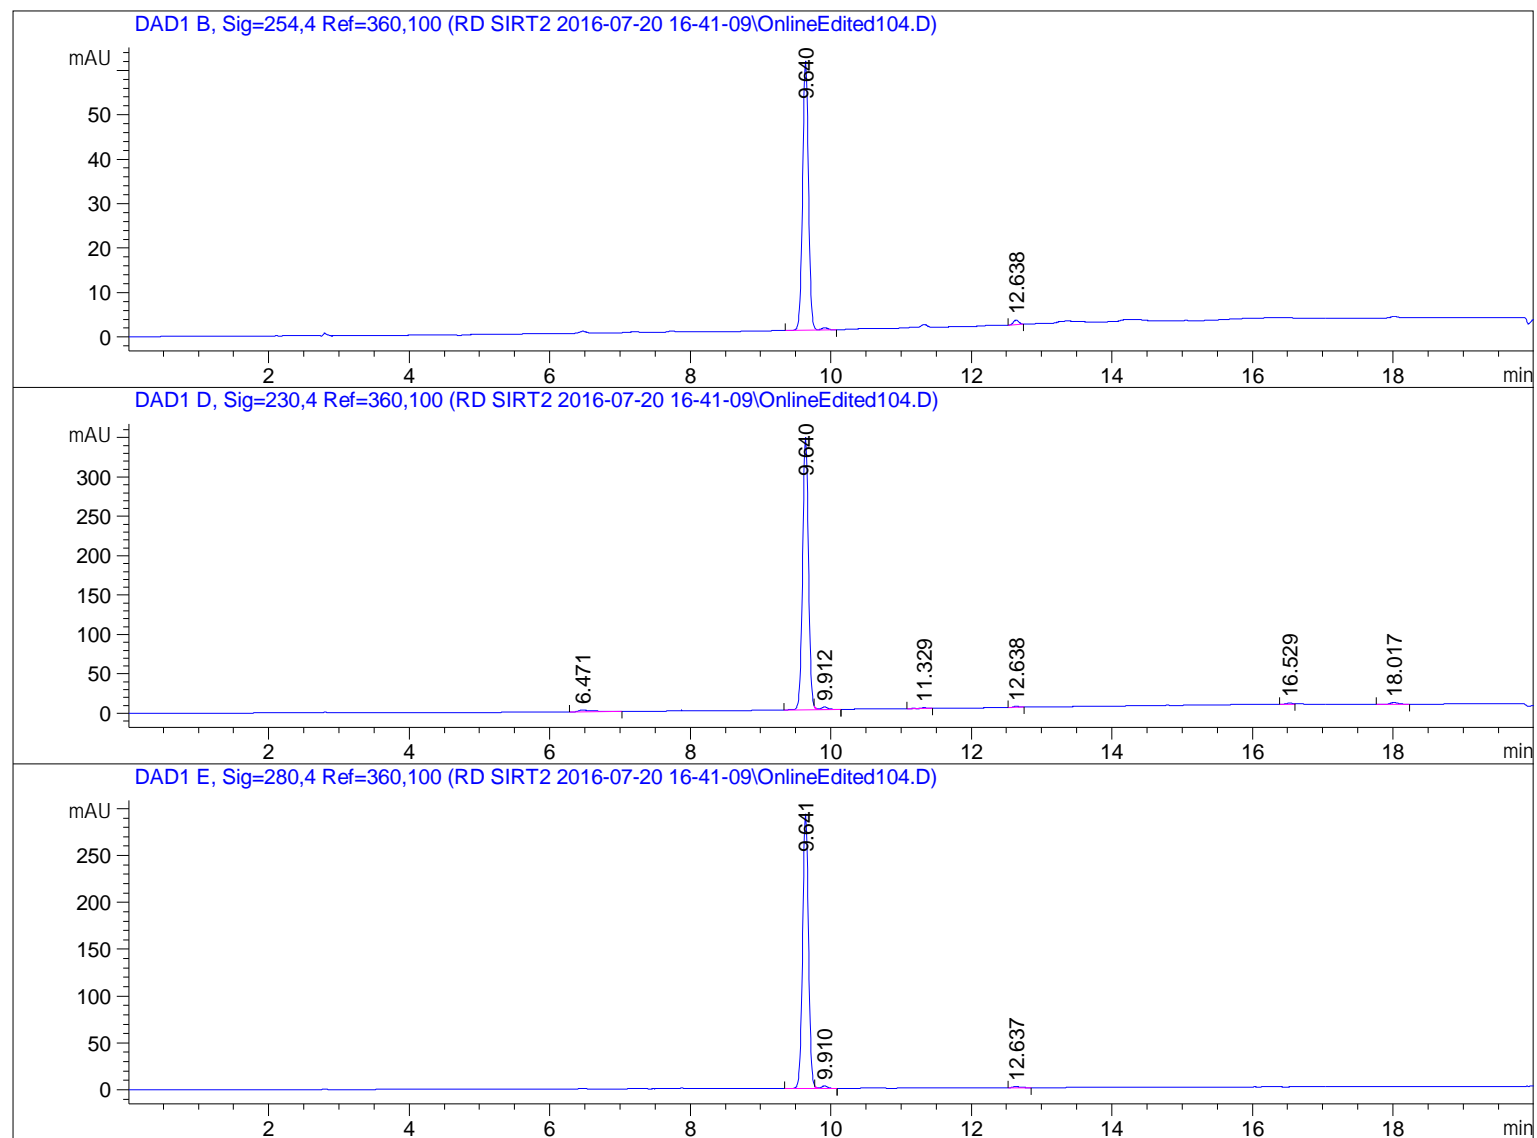

=====  
Area Percent Report  
=====

```
Sorted By      :      Signal
Multiplier     :      1.0000
Dilution       :      1.0000
Use Multiplier & Dilution Factor with ISTDs
```

Signal 1: DAD1 B, Sig=254,4 Ref=360,100

| Peak # | RetTime [min] | Type | Width [min] | Area [mAU*s] | Height [mAU] | Area %  |
|--------|---------------|------|-------------|--------------|--------------|---------|
| 1      | 9.640         | BV R | 0.0908      | 357.65024    | 60.62461     | 98.5311 |
| 2      | 12.638        | BB   | 0.0809      | 5.33194      | 1.02185      | 1.4689  |

Totals : 362.98218 61.64646

Signal 2: DAD1 D, Sig=230,4 Ref=360,100

| Peak # | RetTime [min] | Type | Width [min] | Area [mAU*s] | Height [mAU] | Area %  |
|--------|---------------|------|-------------|--------------|--------------|---------|
| 1      | 6.471         | BB   | 0.1748      | 32.09124     | 2.51630      | 1.5179  |
| 2      | 9.640         | BV R | 0.0903      | 2022.75220   | 345.73767    | 95.6763 |
| 3      | 9.912         | VB E | 0.0975      | 19.74686     | 3.05138      | 0.9340  |
| 4      | 11.329        | BB   | 0.1044      | 7.48140      | 1.05923      | 0.3539  |
| 5      | 12.638        | BB   | 0.0822      | 7.88355      | 1.47983      | 0.3729  |
| 6      | 16.529        | BV   | 0.0961      | 8.74571      | 1.37774      | 0.4137  |
| 7      | 18.017        | BB   | 0.1013      | 15.46028     | 2.33373      | 0.7313  |

Totals : 2114.16124 357.55588

Signal 3: DAD1 E, Sig=280,4 Ref=360,100

| Peak # | RetTime [min] | Type | Width [min] | Area [mAU*s] | Height [mAU] | Area %  |
|--------|---------------|------|-------------|--------------|--------------|---------|
| 1      | 9.641         | BV R | 0.0902      | 1712.82117   | 293.09143    | 98.6368 |
| 2      | 9.910         | VB E | 0.0929      | 15.87911     | 2.61360      | 0.9144  |
| 3      | 12.637        | BB   | 0.0917      | 7.79266      | 1.26766      | 0.4488  |

Totals : 1736.49294 296.97269

\*\*\* End of Report \*\*\*



Sample Name: LC-0535

**Compound 19c**

```
=====
Acq. Operator   : SYSTEM                      Seq. Line :    4
Acq. Instrument : CDD                        Location  : P1-F-04
Injection Date  : 7/21/2016 11:52:41 AM      Inj       :    1
                                           Inj Volume: 5.000 µl
Different Inj Volume from Sample Entry! Actual Inj Volume : 10.000 µl
Method          : C:\Chem32\1\Data\RD SIRT2 2016-07-21 10-43-19\RD VCP Methanol 40-100.M (
                  Sequence Method)
Last changed    : 7/21/2016 10:43:19 AM by SYSTEM
Method Info     : test
=====
```

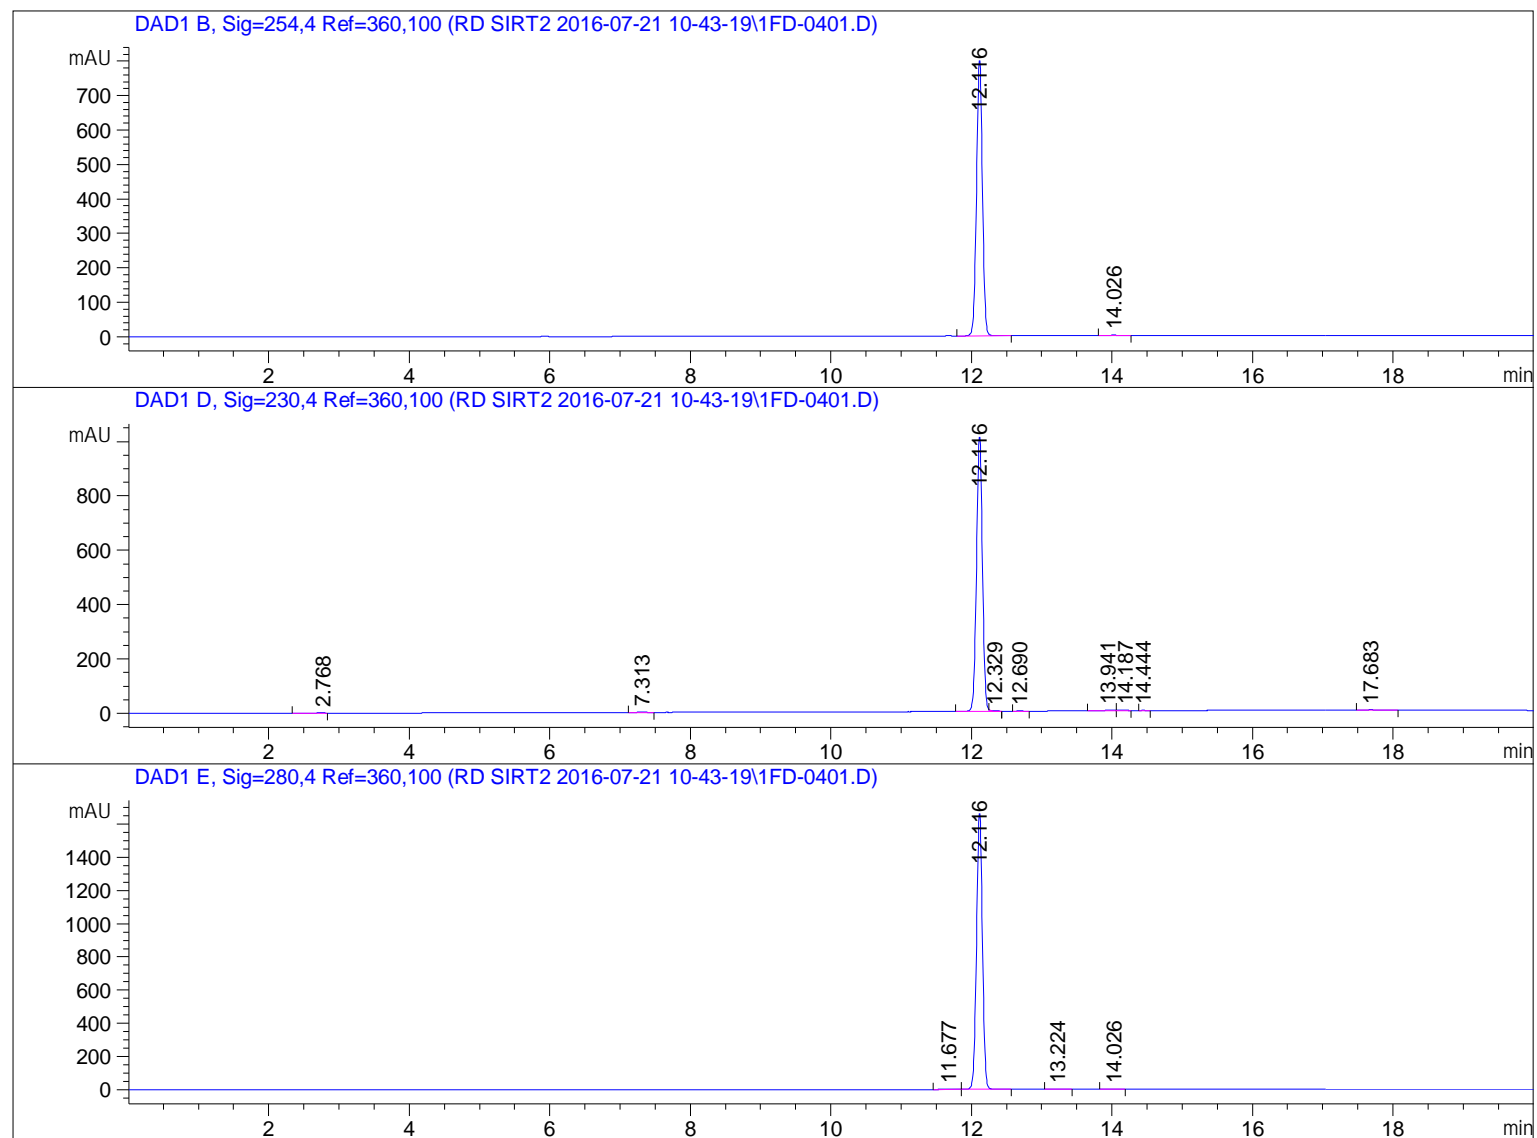

=====  
Area Percent Report  
=====

```
Sorted By      :      Signal
Multiplier     :      1.0000
Dilution       :      1.0000
Use Multiplier & Dilution Factor with ISTDs
```

Signal 1: DAD1 B, Sig=254,4 Ref=360,100

| Peak # | RetTime [min] | Type | Width [min] | Area [mAU*s] | Height [mAU] | Area %  |
|--------|---------------|------|-------------|--------------|--------------|---------|
| 1      | 12.116        | BB   | 0.0916      | 4636.44238   | 800.61377    | 99.7084 |
| 2      | 14.026        | BB   | 0.1059      | 13.55839     | 1.84174      | 0.2916  |

Totals : 4650.00077 802.45551

Signal 2: DAD1 D, Sig=230,4 Ref=360,100

| Peak # | RetTime [min] | Type | Width [min] | Area [mAU*s] | Height [mAU] | Area %  |
|--------|---------------|------|-------------|--------------|--------------|---------|
| 1      | 2.768         | BB   | 0.1049      | 8.82315      | 1.13259      | 0.1481  |
| 2      | 7.313         | BB   | 0.1045      | 7.48587      | 1.11323      | 0.1256  |
| 3      | 12.116        | BV R | 0.0916      | 5858.89453   | 1011.65424   | 98.3296 |
| 4      | 12.329        | VB E | 0.0796      | 7.75098      | 1.46916      | 0.1301  |
| 5      | 12.690        | BB   | 0.0794      | 5.97229      | 1.17264      | 0.1002  |
| 6      | 13.941        | BV   | 0.1073      | 23.02696     | 2.94097      | 0.3865  |
| 7      | 14.187        | VB   | 0.1101      | 24.69013     | 2.99834      | 0.4144  |
| 8      | 14.444        | VB   | 0.0698      | 5.99529      | 1.35079      | 0.1006  |
| 9      | 17.683        | BB   | 0.1032      | 15.78221     | 2.26720      | 0.2649  |

Totals : 5958.42142 1026.09916

Signal 3: DAD1 E, Sig=280,4 Ref=360,100

| Peak # | RetTime [min] | Type | Width [min] | Area [mAU*s] | Height [mAU] | Area %  |
|--------|---------------|------|-------------|--------------|--------------|---------|
| 1      | 11.677        | BB   | 0.1073      | 11.49272     | 1.57119      | 0.1186  |
| 2      | 12.116        | BB   | 0.0917      | 9655.46973   | 1665.05383   | 99.6822 |
| 3      | 13.224        | BB   | 0.0979      | 7.71723      | 1.15559      | 0.0797  |
| 4      | 14.026        | BB   | 0.0871      | 11.57047     | 2.07252      | 0.1195  |

Totals : 9686.25015 1669.85313

\*\*\* End of Report \*\*\*

Sample Name: LC-0541

**Compound 20a**

```
=====
Acq. Operator   : SYSTEM                      Seq. Line :   36
Acq. Instrument : CDD                        Location  :   Pl-E-01
Injection Date  : 7/21/2016 6:01:29 AM        Inj       :    1
                                           Inj Volume: 5.000 µl
Different Inj Volume from Sample Entry! Actual Inj Volume : 10.000 µl
Method          : C:\Chem32\1\Data\RD SIRT2 2016-07-20 16-41-09\RD VCP Methanol 40-100.M (
                  Sequence Method)
Last changed    : 7/20/2016 4:41:10 PM by SYSTEM
Method Info     : test
=====
```

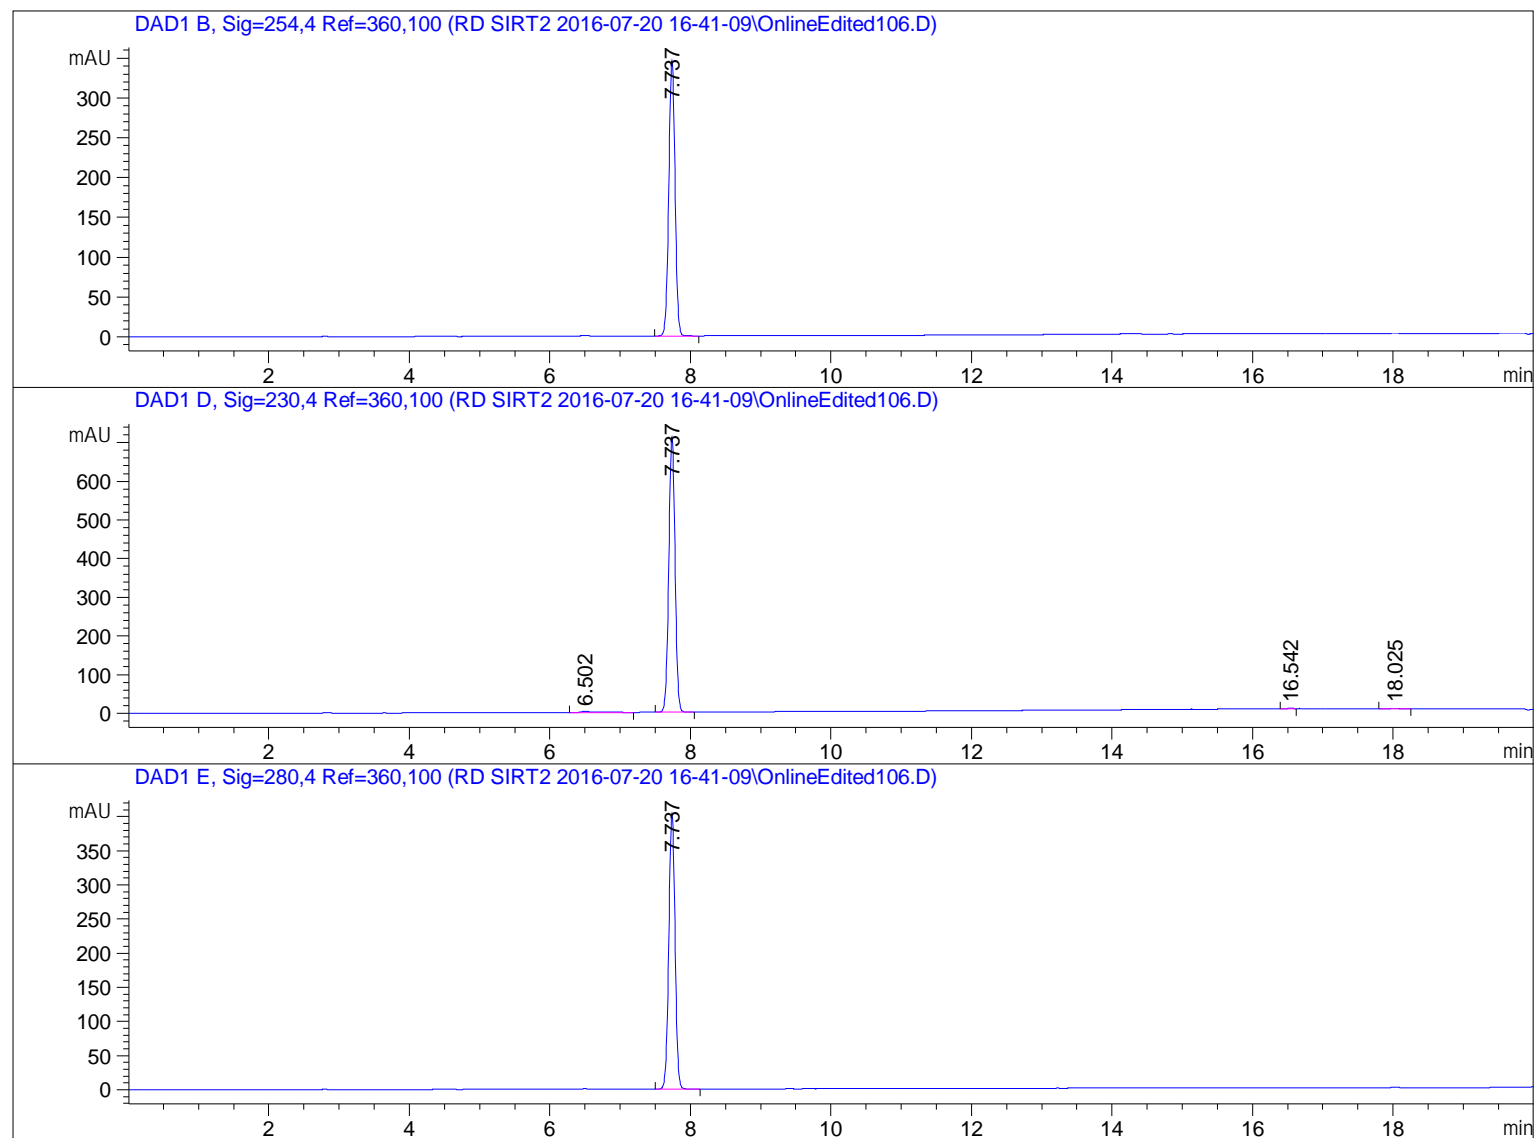

```
=====
                        Area Percent Report
=====
```

```
Sorted By      :      Signal
Multiplier     :      1.0000
Dilution       :      1.0000
Use Multiplier & Dilution Factor with ISTDs
```

Signal 1: DAD1 B, Sig=254,4 Ref=360,100

| Peak # | RetTime [min] | Type | Width [min] | Area [mAU*s] | Height [mAU] | Area %   |
|--------|---------------|------|-------------|--------------|--------------|----------|
| 1      | 7.737         | BB   | 0.0957      | 2123.18237   | 345.43533    | 100.0000 |

Totals : 2123.18237 345.43533

Signal 2: DAD1 D, Sig=230,4 Ref=360,100

| Peak # | RetTime [min] | Type | Width [min] | Area [mAU*s] | Height [mAU] | Area %  |
|--------|---------------|------|-------------|--------------|--------------|---------|
| 1      | 6.502         | BB   | 0.1744      | 46.79127     | 3.67814      | 1.0524  |
| 2      | 7.737         | BB   | 0.0958      | 4376.38916   | 710.96106    | 98.4326 |
| 3      | 16.542        | BV   | 0.0961      | 8.32808      | 1.31062      | 0.1873  |
| 4      | 18.025        | BB   | 0.0983      | 14.56958     | 2.22677      | 0.3277  |

Totals : 4446.07809 718.17659

Signal 3: DAD1 E, Sig=280,4 Ref=360,100

| Peak # | RetTime [min] | Type | Width [min] | Area [mAU*s] | Height [mAU] | Area %   |
|--------|---------------|------|-------------|--------------|--------------|----------|
| 1      | 7.737         | BB   | 0.0957      | 2477.27515   | 403.12604    | 100.0000 |

Totals : 2477.27515 403.12604

=====  
\*\*\* End of Report \*\*\*

Sample Name: LC-0556

**Compound 20b**

```
=====
Acq. Operator   : SYSTEM                      Seq. Line :   37
Acq. Instrument : CDD                        Location  :   Pl-E-02
Injection Date  : 7/21/2016 6:24:19 AM        Inj       :    1
                                           Inj Volume: 5.000 µl
Different Inj Volume from Sample Entry! Actual Inj Volume : 10.000 µl
Method          : C:\Chem32\1\Data\RD SIRT2 2016-07-20 16-41-09\RD VCP Methanol 40-100.M (
                  Sequence Method)
Last changed    : 7/20/2016 4:41:10 PM by SYSTEM
Method Info     : test
=====
```

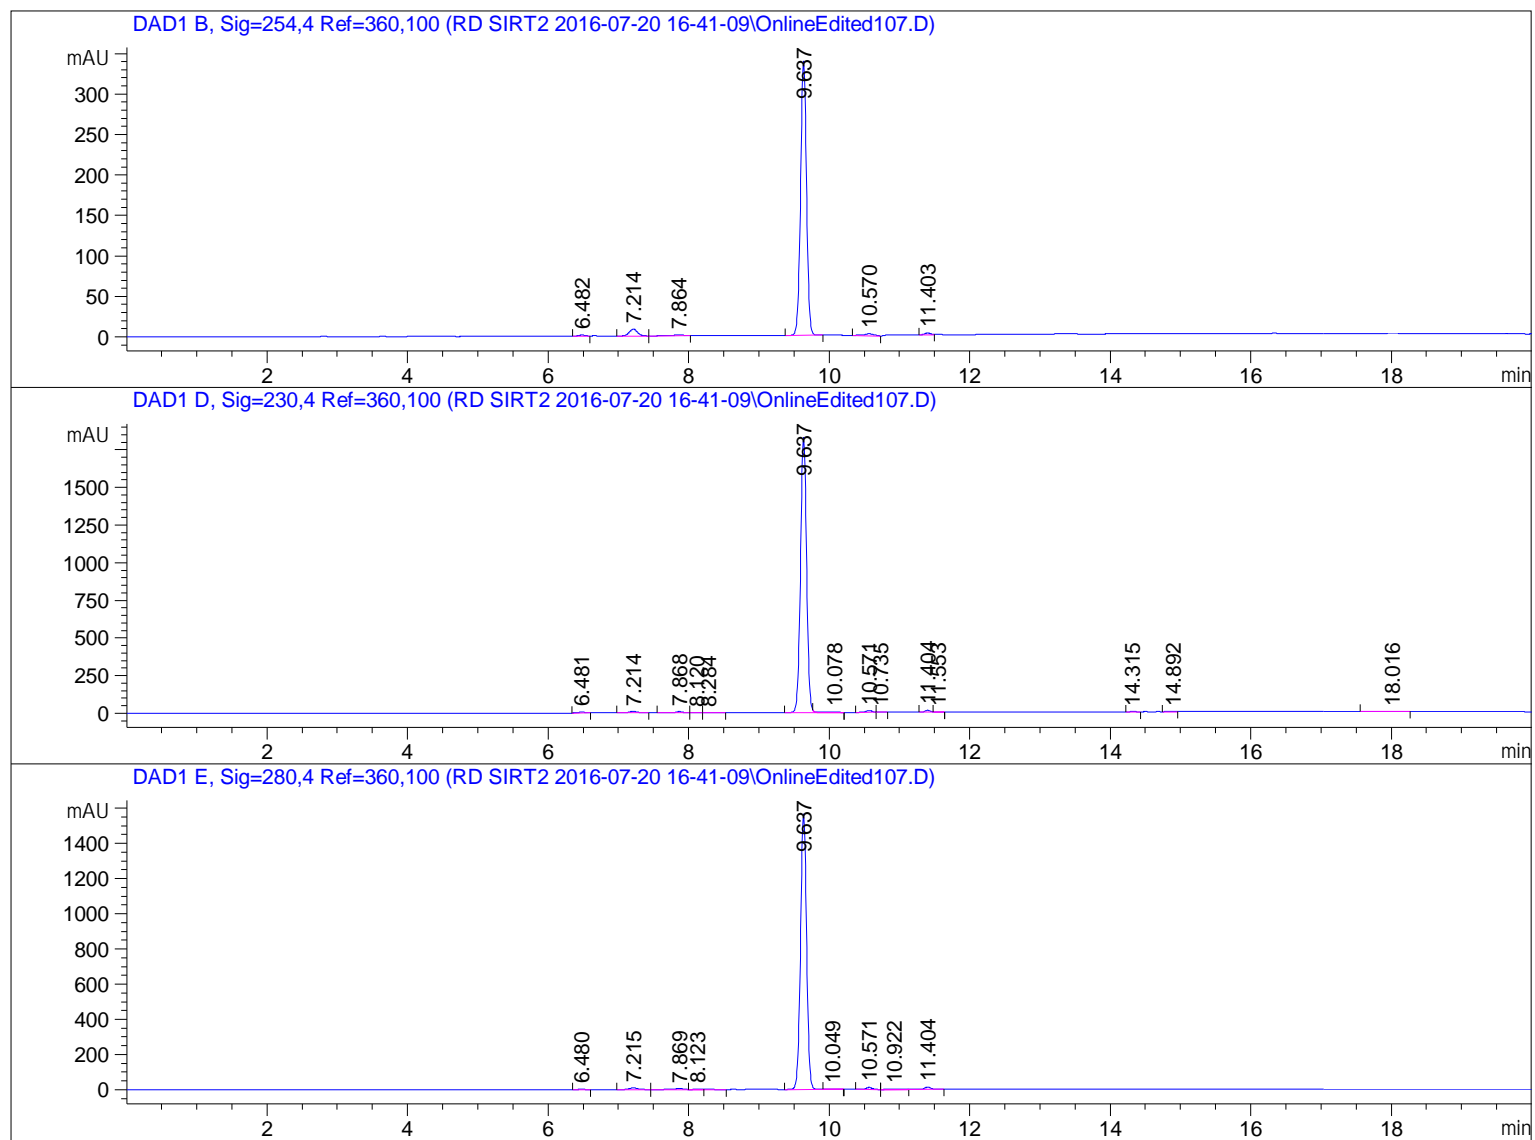

=====  
Area Percent Report  
=====

```
Sorted By      :      Signal
Multiplier     :      1.0000
Dilution       :      1.0000
Use Multiplier & Dilution Factor with ISTDs
```

Signal 1: DAD1 B, Sig=254,4 Ref=360,100

| Peak # | RetTime [min] | Type | Width [min] | Area [mAU*s] | Height [mAU] | Area %  |
|--------|---------------|------|-------------|--------------|--------------|---------|
| 1      | 6.482         | BB   | 0.0985      | 7.06549      | 1.13634      | 0.3320  |
| 2      | 7.214         | BB   | 0.1242      | 68.22322     | 8.44874      | 3.2053  |
| 3      | 7.864         | BB   | 0.1680      | 16.99800     | 1.43656      | 0.7986  |
| 4      | 9.637         | BB   | 0.0908      | 1999.68823   | 339.21512    | 93.9497 |
| 5      | 10.570        | BB   | 0.1339      | 23.19562     | 2.46303      | 1.0898  |
| 6      | 11.403        | BV   | 0.0891      | 13.29632     | 2.31204      | 0.6247  |

Totals : 2128.46688 355.01183

Signal 2: DAD1 D, Sig=230,4 Ref=360,100

| Peak # | RetTime [min] | Type | Width [min] | Area [mAU*s] | Height [mAU] | Area %  |
|--------|---------------|------|-------------|--------------|--------------|---------|
| 1      | 6.481         | BB   | 0.1024      | 35.25259     | 5.52707      | 0.3087  |
| 2      | 7.214         | BB   | 0.1272      | 78.76927     | 9.45400      | 0.6898  |
| 3      | 7.868         | BV   | 0.1152      | 60.45124     | 7.91050      | 0.5294  |
| 4      | 8.120         | VV   | 0.1006      | 7.61487      | 1.15981      | 0.0667  |
| 5      | 8.284         | VB   | 0.1178      | 10.86510     | 1.32322      | 0.0951  |
| 6      | 9.637         | BV R | 0.0942      | 1.10005e4    | 1827.47119   | 96.3303 |
| 7      | 10.078        | VB E | 0.2558      | 27.59331     | 1.54927      | 0.2416  |
| 8      | 10.571        | BV   | 0.0924      | 71.80737     | 11.89938     | 0.6288  |
| 9      | 10.735        | VB   | 0.0830      | 17.12562     | 3.17276      | 0.1500  |
| 10     | 11.404        | BV R | 0.0883      | 70.24521     | 12.36404     | 0.6151  |
| 11     | 11.553        | VB E | 0.0760      | 6.02960      | 1.25727      | 0.0528  |
| 12     | 14.315        | BV   | 0.0928      | 7.17471      | 1.14973      | 0.0628  |
| 13     | 14.892        | VV   | 0.1179      | 10.99280     | 1.25834      | 0.0963  |
| 14     | 18.016        | BB   | 0.1025      | 15.13963     | 2.19490      | 0.1326  |

Totals : 1.14196e4 1887.69149

Signal 3: DAD1 E, Sig=280,4 Ref=360,100

| Peak # | RetTime [min] | Type | Width [min] | Area [mAU*s] | Height [mAU] | Area %  |
|--------|---------------|------|-------------|--------------|--------------|---------|
| 1      | 6.480         | BB   | 0.1010      | 8.69016      | 1.38820      | 0.0890  |
| 2      | 7.215         | BB   | 0.1295      | 77.15298     | 9.04280      | 0.7906  |
| 3      | 7.869         | BV R | 0.1311      | 56.74624     | 6.29980      | 0.5815  |
| 4      | 8.123         | VV E | 0.1126      | 8.68707      | 1.17012      | 0.0890  |
| 5      | 9.637         | BV R | 0.0941      | 9408.98438   | 1566.49939   | 96.4107 |
| 6      | 10.049        | VB E | 0.1236      | 8.80943      | 1.12216      | 0.0903  |
| 7      | 10.571        | BB   | 0.0993      | 76.16367     | 11.49812     | 0.7804  |
| 8      | 10.922        | BV E | 0.1871      | 26.94633     | 1.92803      | 0.2761  |
| 9      | 11.404        | VB R | 0.0976      | 87.09547     | 13.44311     | 0.8924  |

Totals : 9759.27572 1612.39174

=====

\*\*\* End of Report \*\*\*

Sample Name: LC-0561

## Compound 20c

```
=====
Acq. Operator   : SYSTEM                      Seq. Line :   38
Acq. Instrument : CDD                        Location  :   P1-E-03
Injection Date  : 7/21/2016 6:47:09 AM        Inj       :    1
                                           Inj Volume: 5.000 µl
Different Inj Volume from Sample Entry! Actual Inj Volume : 10.000 µl
Method          : C:\Chem32\1\Data\RD SIRT2 2016-07-20 16-41-09\RD VCP Methanol 40-100.M (
                  Sequence Method)
Last changed    : 7/20/2016 4:41:10 PM by SYSTEM
Method Info     : test
=====
```

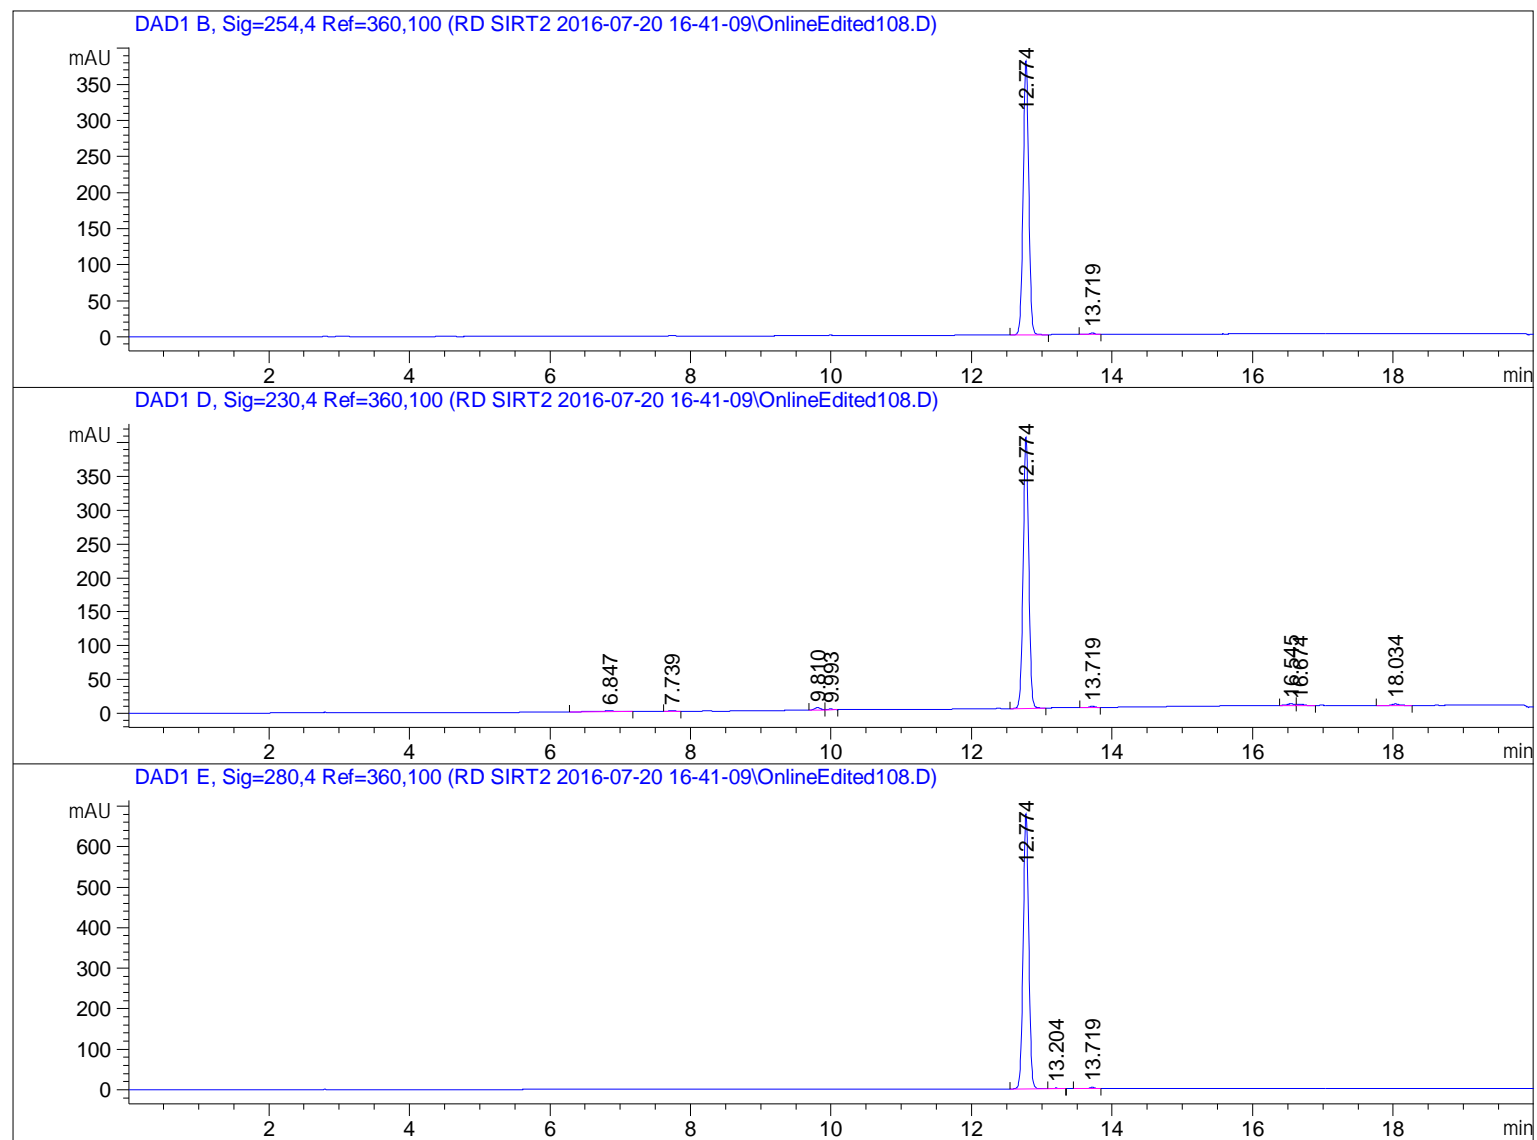

```
=====
                          Area Percent Report
=====
```

```
Sorted By           :      Signal
Multiplier          :      1.0000
Dilution            :      1.0000
Use Multiplier & Dilution Factor with ISTDs
```



Signal 1: DAD1 B, Sig=254,4 Ref=360,100

| Peak # | RetTime [min] | Type | Width [min] | Area [mAU*s] | Height [mAU] | Area %  |
|--------|---------------|------|-------------|--------------|--------------|---------|
| 1      | 12.774        | BB   | 0.0840      | 2090.93628   | 380.90067    | 99.5268 |
| 2      | 13.719        | BB   | 0.0806      | 9.94177      | 1.91527      | 0.4732  |

Totals : 2100.87805 382.81594

Signal 2: DAD1 D, Sig=230,4 Ref=360,100

| Peak # | RetTime [min] | Type | Width [min] | Area [mAU*s] | Height [mAU] | Area %  |
|--------|---------------|------|-------------|--------------|--------------|---------|
| 1      | 6.847         | BB   | 0.2140      | 33.59001     | 2.06222      | 1.4441  |
| 2      | 7.739         | BB   | 0.0951      | 7.82613      | 1.28368      | 0.3365  |
| 3      | 9.810         | BV   | 0.0925      | 20.14105     | 3.43261      | 0.8659  |
| 4      | 9.993         | VB   | 0.0801      | 6.33969      | 1.22992      | 0.2726  |
| 5      | 12.774        | BB   | 0.0841      | 2205.48584   | 401.50620    | 94.8173 |
| 6      | 13.719        | BB   | 0.0809      | 8.95713      | 1.71712      | 0.3851  |
| 7      | 16.545        | BV   | 0.0977      | 16.66931     | 2.56943      | 0.7166  |
| 8      | 16.674        | VV   | 0.0992      | 12.54076     | 1.84791      | 0.5391  |
| 9      | 18.034        | BB   | 0.1014      | 14.48838     | 2.18467      | 0.6229  |

Totals : 2326.03830 417.83375

Signal 3: DAD1 E, Sig=280,4 Ref=360,100

| Peak # | RetTime [min] | Type | Width [min] | Area [mAU*s] | Height [mAU] | Area %  |
|--------|---------------|------|-------------|--------------|--------------|---------|
| 1      | 12.774        | BV R | 0.0840      | 3734.02515   | 680.39209    | 99.2932 |
| 2      | 13.204        | VB E | 0.0838      | 8.70740      | 1.64330      | 0.2315  |
| 3      | 13.719        | BB   | 0.0812      | 17.87073     | 3.40702      | 0.4752  |

Totals : 3760.60327 685.44242

\*\*\* End of Report \*\*\*

Sample Name: LC-0542

**Compound 21a**

```
=====
Acq. Operator   : SYSTEM                      Seq. Line :   39
Acq. Instrument : CDD                        Location  :   Pl-E-04
Injection Date  : 7/21/2016 7:10:00 AM        Inj       :    1
                                           Inj Volume: 5.000 µl
Different Inj Volume from Sample Entry! Actual Inj Volume : 10.000 µl
Method         : C:\Chem32\1\Data\RD SIRT2 2016-07-20 16-41-09\RD VCP Methanol 40-100.M (
                Sequence Method)
Last changed    : 7/20/2016 4:41:10 PM by SYSTEM
Method Info     : test
=====
```

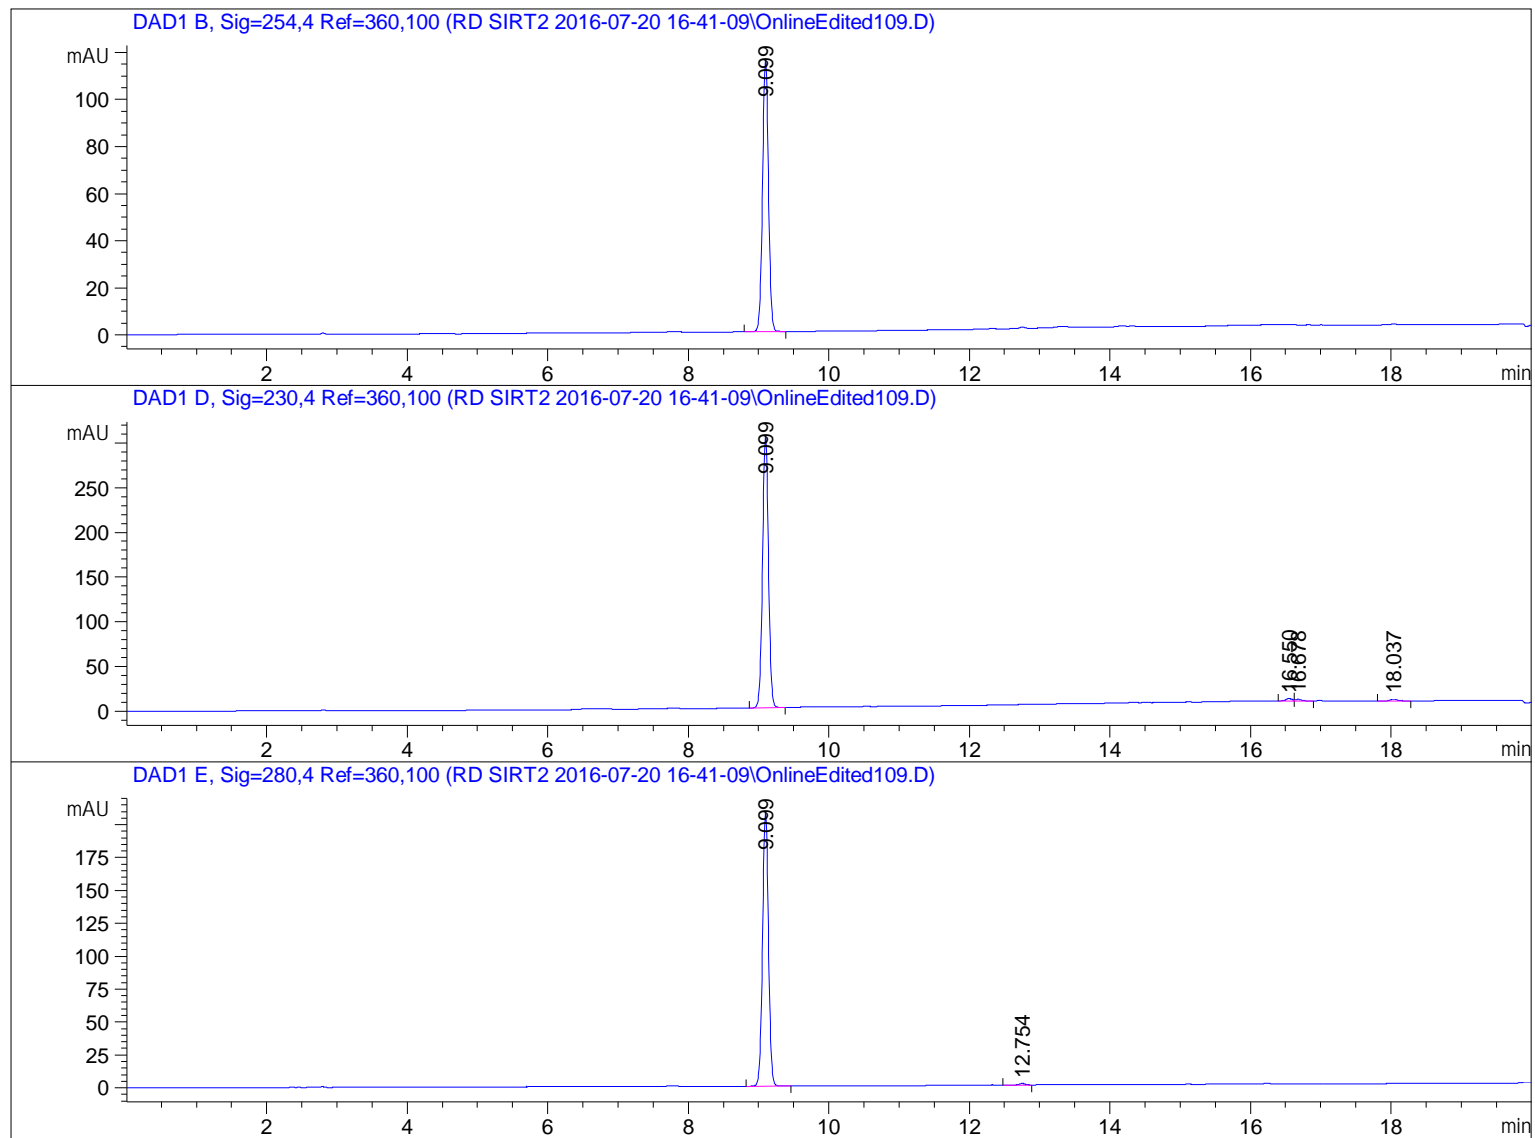

=====  
Area Percent Report  
=====

```
Sorted By      :      Signal
Multiplier     :      1.0000
Dilution       :      1.0000
Use Multiplier & Dilution Factor with ISTDs
```

Signal 1: DAD1 B, Sig=254,4 Ref=360,100

| Peak # | RetTime [min] | Type | Width [min] | Area [mAU*s] | Height [mAU] | Area %   |
|--------|---------------|------|-------------|--------------|--------------|----------|
| 1      | 9.099         | BB   | 0.0906      | 681.82251    | 115.90252    | 100.0000 |

Totals : 681.82251 115.90252

Signal 2: DAD1 D, Sig=230,4 Ref=360,100

| Peak # | RetTime [min] | Type | Width [min] | Area [mAU*s] | Height [mAU] | Area %  |
|--------|---------------|------|-------------|--------------|--------------|---------|
| 1      | 9.099         | BB   | 0.0906      | 1791.48523   | 304.45996    | 97.6799 |
| 2      | 16.550        | BV   | 0.0959      | 16.20405     | 2.55859      | 0.8835  |
| 3      | 16.678        | VV   | 0.1009      | 12.12503     | 1.74776      | 0.6611  |
| 4      | 18.037        | BB   | 0.1023      | 14.22153     | 2.11895      | 0.7754  |

Totals : 1834.03584 310.88526

Signal 3: DAD1 E, Sig=280,4 Ref=360,100

| Peak # | RetTime [min] | Type | Width [min] | Area [mAU*s] | Height [mAU] | Area %  |
|--------|---------------|------|-------------|--------------|--------------|---------|
| 1      | 9.099         | BB   | 0.0906      | 1226.75720   | 208.50642    | 99.4463 |
| 2      | 12.754        | BB   | 0.0869      | 6.83019      | 1.19077      | 0.5537  |

Totals : 1233.58739 209.69719

=====  
\*\*\* End of Report \*\*\*

Sample Name: LC-0539

**Compound 21b**

```
=====
Acq. Operator   : SYSTEM                      Seq. Line :   40
Acq. Instrument : CDD                        Location  :   P1-E-05
Injection Date  : 7/21/2016 7:32:49 AM       Inj       :    1
                                           Inj Volume: 5.000 µl
Different Inj Volume from Sample Entry! Actual Inj Volume : 10.000 µl
Method          : C:\Chem32\1\Data\RD SIRT2 2016-07-20 16-41-09\RD VCP Methanol 40-100.M (
                  Sequence Method)
Last changed    : 7/20/2016 4:41:10 PM by SYSTEM
Method Info     : test
=====
```

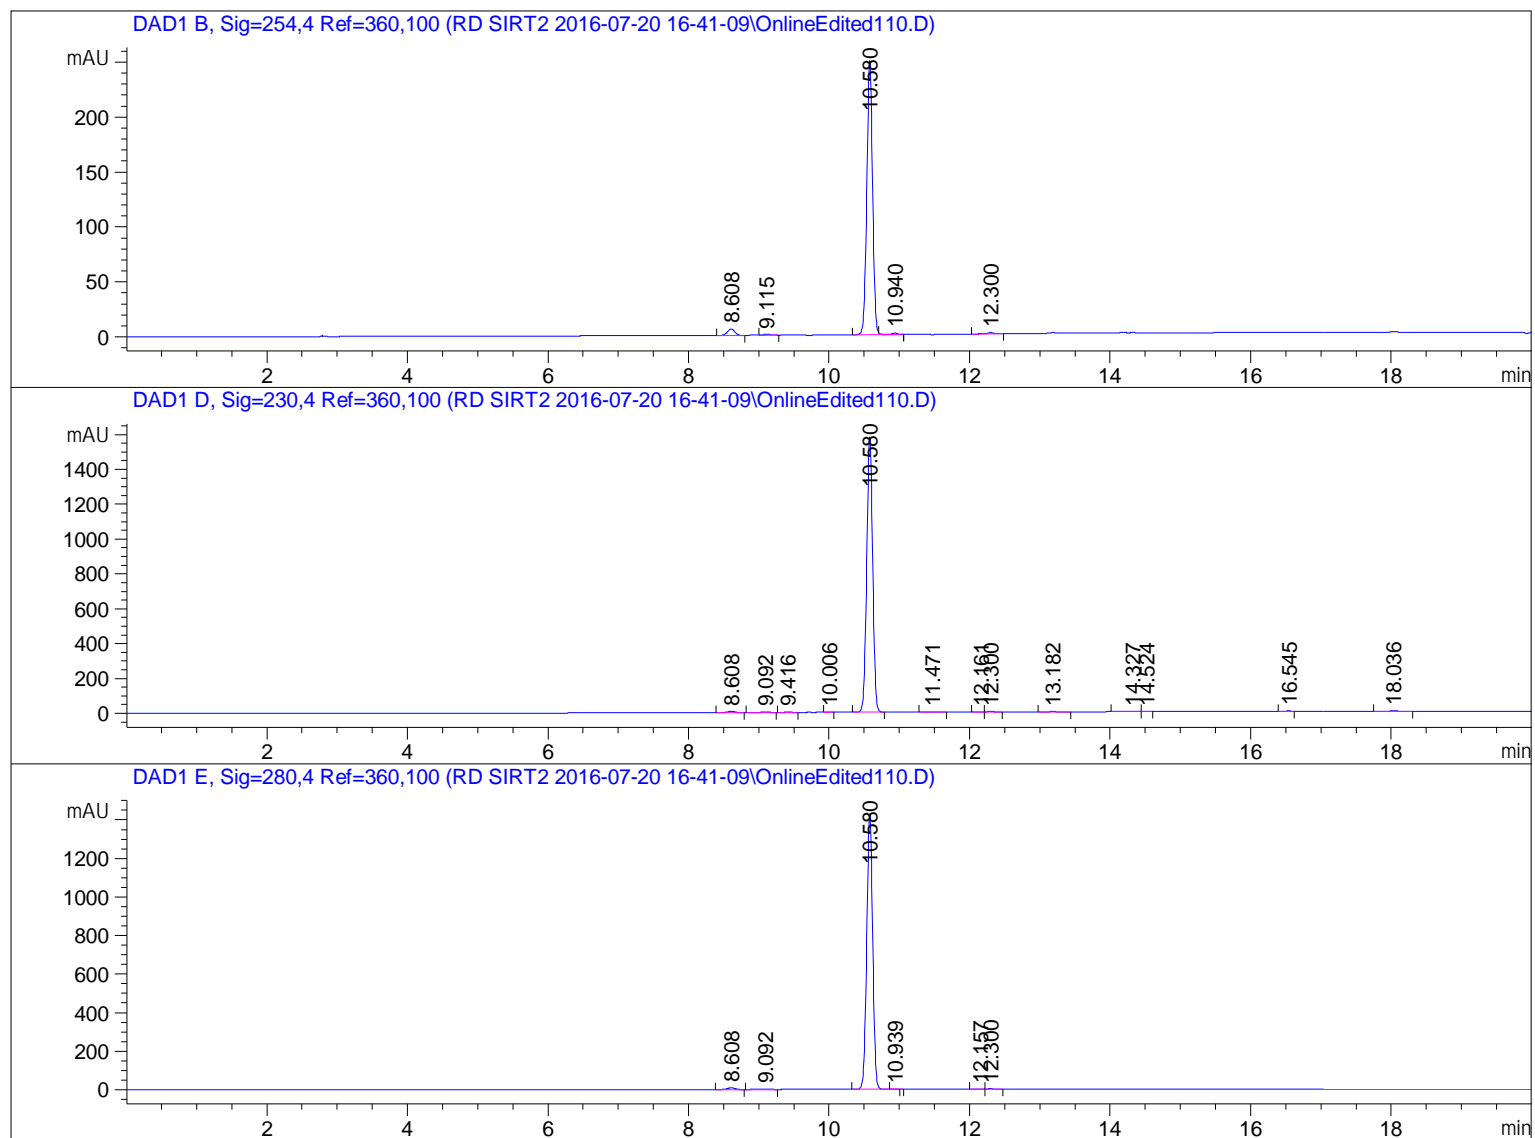

=====  
Area Percent Report  
=====

```
Sorted By      :      Signal
Multiplier     :      1.0000
Dilution       :      1.0000
Use Multiplier & Dilution Factor with ISTDs
```

Signal 1: DAD1 B, Sig=254,4 Ref=360,100

| Peak # | RetTime [min] | Type | Width [min] | Area [mAU*s] | Height [mAU] | Area %  |
|--------|---------------|------|-------------|--------------|--------------|---------|
| 1      | 8.608         | BB   | 0.1125      | 43.16435     | 5.95663      | 2.9140  |
| 2      | 9.115         | VB   | 0.1029      | 7.48319      | 1.10609      | 0.5052  |
| 3      | 10.580        | BV R | 0.0859      | 1412.17920   | 249.97800    | 95.3351 |
| 4      | 10.940        | VB E | 0.1119      | 10.10654     | 1.31170      | 0.6823  |
| 5      | 12.300        | BB   | 0.0999      | 8.34618      | 1.24943      | 0.5634  |

Totals : 1481.27946 259.60185

Signal 2: DAD1 D, Sig=230,4 Ref=360,100

| Peak # | RetTime [min] | Type | Width [min] | Area [mAU*s] | Height [mAU] | Area %  |
|--------|---------------|------|-------------|--------------|--------------|---------|
| 1      | 8.608         | BB   | 0.1126      | 57.09243     | 7.86936      | 0.6046  |
| 2      | 9.092         | BB   | 0.1139      | 30.90240     | 4.10267      | 0.3273  |
| 3      | 9.416         | BB   | 0.1195      | 9.66486      | 1.28929      | 0.1024  |
| 4      | 10.006        | VV   | 0.0900      | 6.10716      | 1.01720      | 0.0647  |
| 5      | 10.580        | BB   | 0.0922      | 9248.90625   | 1582.37256   | 97.9468 |
| 6      | 11.471        | BB   | 0.1342      | 11.20872     | 1.14522      | 0.1187  |
| 7      | 12.161        | BV   | 0.0838      | 6.52814      | 1.19430      | 0.0691  |
| 8      | 12.300        | VB   | 0.0896      | 25.34690     | 4.25019      | 0.2684  |
| 9      | 13.182        | BB   | 0.1270      | 9.02999      | 1.00291      | 0.0956  |
| 10     | 14.327        | BV   | 0.1030      | 8.76171      | 1.23206      | 0.0928  |
| 11     | 14.524        | VV   | 0.0835      | 5.76590      | 1.02630      | 0.0611  |
| 12     | 16.545        | BV   | 0.0977      | 8.43869      | 1.29980      | 0.0894  |
| 13     | 18.036        | BB   | 0.1055      | 15.03143     | 2.15064      | 0.1592  |

Totals : 9442.78459 1609.95251

Signal 3: DAD1 E, Sig=280,4 Ref=360,100

| Peak # | RetTime [min] | Type | Width [min] | Area [mAU*s] | Height [mAU] | Area %  |
|--------|---------------|------|-------------|--------------|--------------|---------|
| 1      | 8.608         | BB   | 0.1124      | 63.16225     | 8.72879      | 0.7418  |
| 2      | 9.092         | VB R | 0.1181      | 25.07605     | 3.17506      | 0.2945  |
| 3      | 10.580        | BV R | 0.0923      | 8393.91309   | 1434.25732   | 98.5845 |
| 4      | 10.939        | VB E | 0.0742      | 5.24810      | 1.17199      | 0.0616  |
| 5      | 12.157        | BV   | 0.0886      | 7.34116      | 1.24842      | 0.0862  |
| 6      | 12.300        | VB   | 0.0897      | 19.69093     | 3.39462      | 0.2313  |

Totals : 8514.43157 1451.97620

\*\*\* End of Report \*\*\*

Sample Name: LC-0538

**Compound 21c**

```
=====
Acq. Operator   : SYSTEM                      Seq. Line :   41
Acq. Instrument : CDD                        Location  :   P1-E-06
Injection Date  : 7/21/2016 7:55:39 AM       Inj       :    1
                                           Inj Volume: 5.000 µl
Different Inj Volume from Sample Entry! Actual Inj Volume : 10.000 µl
Method          : C:\Chem32\1\Data\RD SIRT2 2016-07-20 16-41-09\RD VCP Methanol 40-100.M (
                  Sequence Method)
Last changed    : 7/20/2016 4:41:10 PM by SYSTEM
Method Info     : test
=====
```

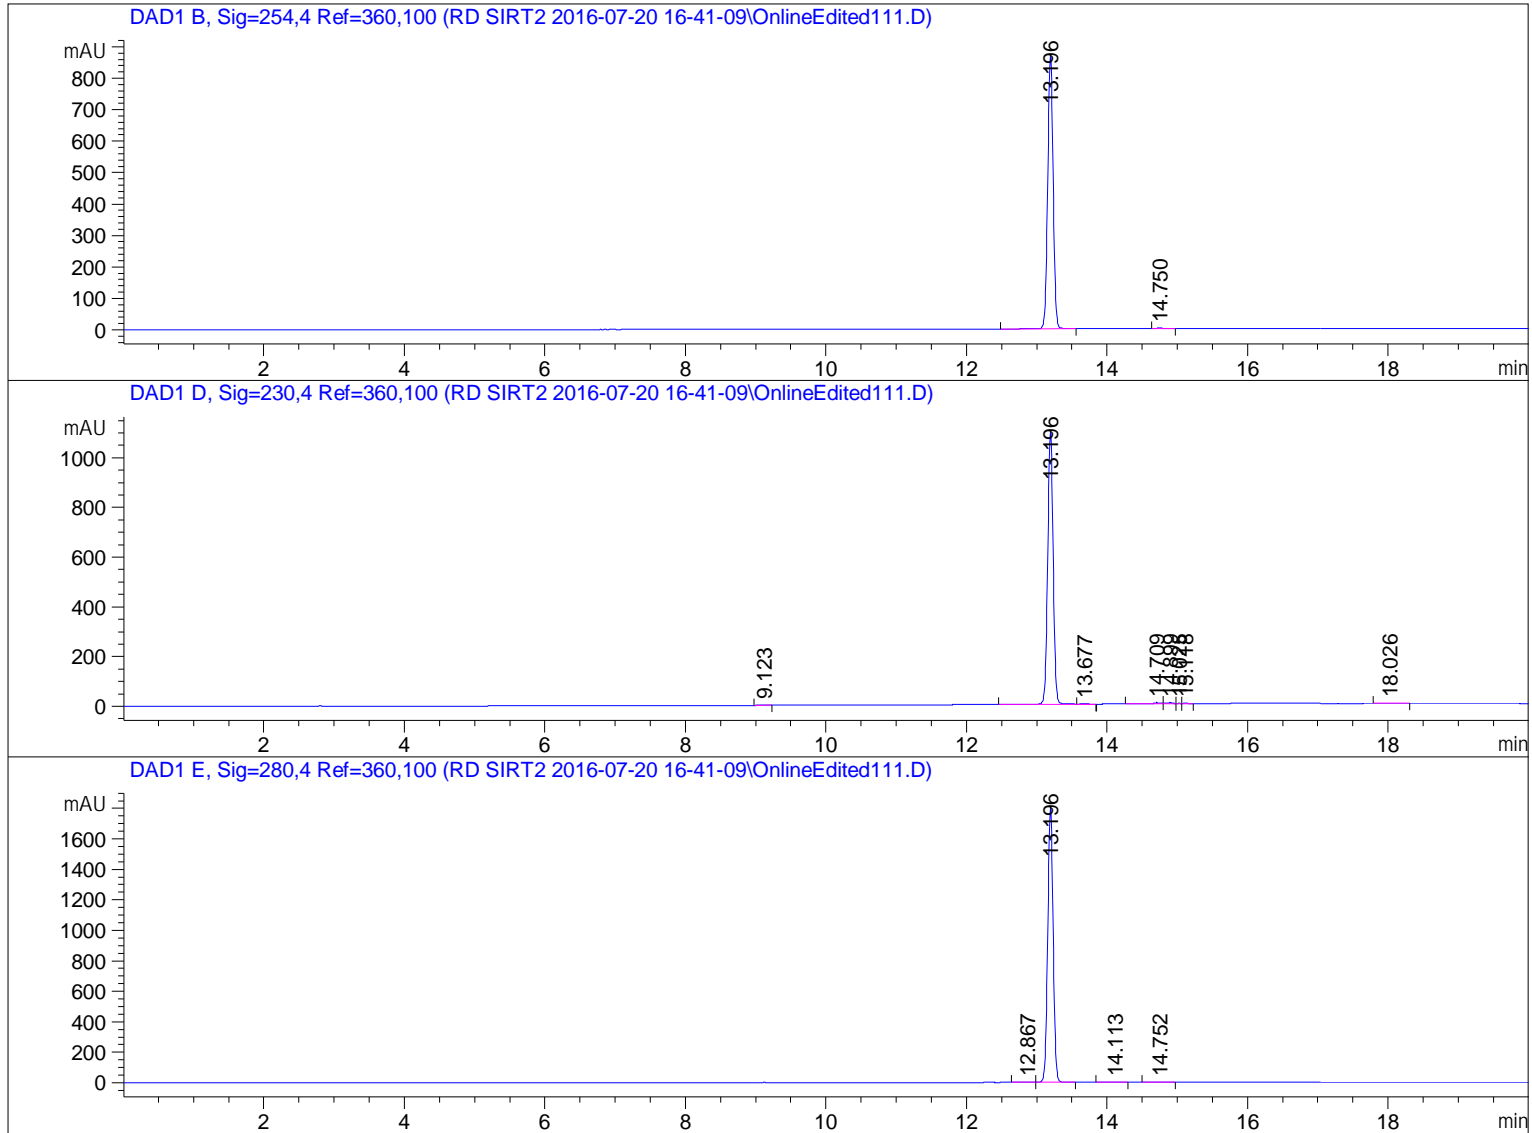

=====  
Area Percent Report  
=====

```
Sorted By      :      Signal
Multiplier     :      1.0000
Dilution       :      1.0000
Use Multiplier & Dilution Factor with ISTDs
```

Signal 1: DAD1 B, Sig=254,4 Ref=360,100

| Peak # | RetTime [min] | Type | Width [min] | Area [mAU*s] | Height [mAU] | Area %  |
|--------|---------------|------|-------------|--------------|--------------|---------|
| 1      | 13.196        | VB R | 0.0824      | 4682.74854   | 876.19794    | 99.7448 |
| 2      | 14.750        | BB   | 0.0925      | 11.97920     | 1.92716      | 0.2552  |

Totals : 4694.72773 878.12510

Signal 2: DAD1 D, Sig=230,4 Ref=360,100

| Peak # | RetTime [min] | Type | Width [min] | Area [mAU*s] | Height [mAU] | Area %  |
|--------|---------------|------|-------------|--------------|--------------|---------|
| 1      | 9.123         | BB   | 0.0890      | 7.01888      | 1.22221      | 0.1159  |
| 2      | 13.196        | VV R | 0.0828      | 5943.80762   | 1104.84973   | 98.1756 |
| 3      | 13.677        | VB E | 0.0853      | 7.46227      | 1.33303      | 0.1233  |
| 4      | 14.709        | BV   | 0.1267      | 37.53565     | 4.10232      | 0.6200  |
| 5      | 14.899        | VV   | 0.1047      | 30.74249     | 3.95327      | 0.5078  |
| 6      | 15.025        | VV   | 0.0631      | 5.30016      | 1.25890      | 0.0875  |
| 7      | 15.118        | VB   | 0.0708      | 8.10740      | 1.72679      | 0.1339  |
| 8      | 18.026        | BB   | 0.1015      | 14.28895     | 2.09739      | 0.2360  |

Totals : 6054.26342 1120.54363

Signal 3: DAD1 E, Sig=280,4 Ref=360,100

| Peak # | RetTime [min] | Type | Width [min] | Area [mAU*s] | Height [mAU] | Area %  |
|--------|---------------|------|-------------|--------------|--------------|---------|
| 1      | 12.867        | BV   | 0.0981      | 12.18941     | 1.82092      | 0.1255  |
| 2      | 13.196        | VB   | 0.0824      | 9681.74023   | 1811.56824   | 99.6431 |
| 3      | 14.113        | BB   | 0.1002      | 9.21157      | 1.37466      | 0.0948  |
| 4      | 14.752        | VB R | 0.0873      | 13.27586     | 2.23474      | 0.1366  |

Totals : 9716.41707 1816.99856

\*\*\* End of Report \*\*\*

Sample Name: LC-0557

**Compound 22a**

```
=====
Acq. Operator   : SYSTEM                      Seq. Line :   42
Acq. Instrument : CDD                        Location  :   Pl-E-07
Injection Date  : 7/21/2016 8:18:30 AM        Inj       :    1
                                           Inj Volume: 5.000 µl
Different Inj Volume from Sample Entry! Actual Inj Volume : 10.000 µl
Method          : C:\Chem32\1\Data\RD SIRT2 2016-07-20 16-41-09\RD VCP Methanol 40-100.M (
                  Sequence Method)
Last changed    : 7/20/2016 4:41:10 PM by SYSTEM
Method Info     : test
=====
```

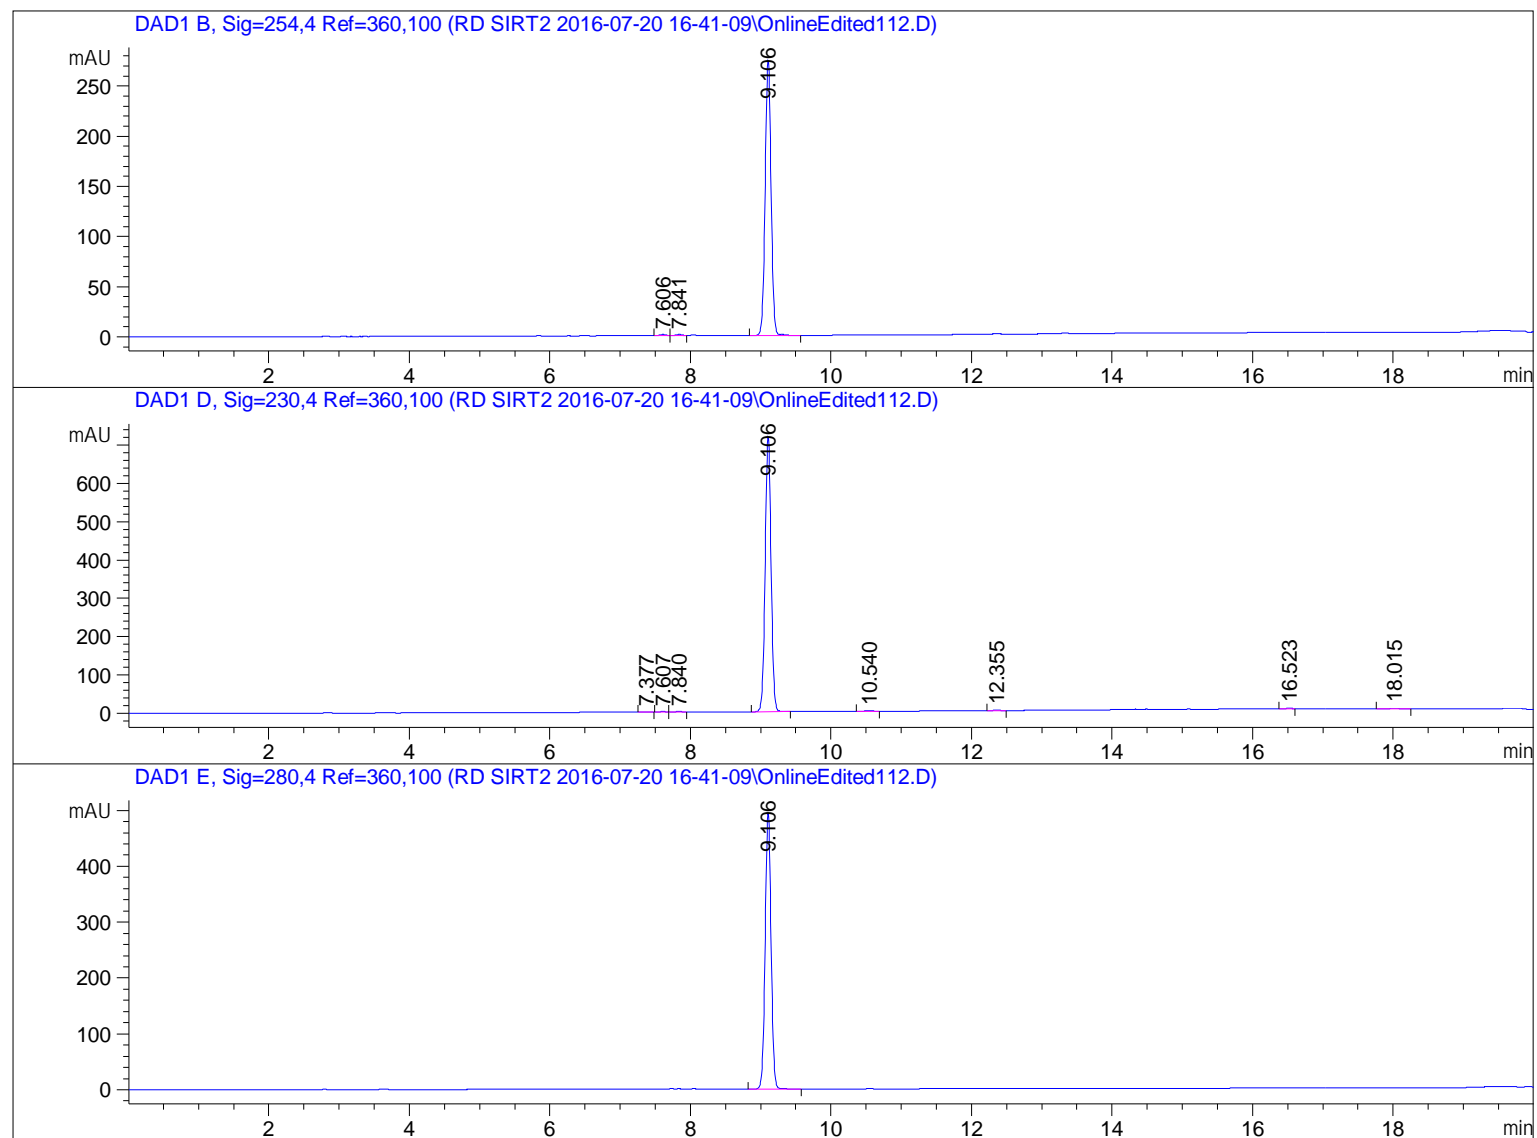

=====  
Area Percent Report  
=====

```
Sorted By      :      Signal
Multiplier     :      1.0000
Dilution       :      1.0000
Use Multiplier & Dilution Factor with ISTDs
```



Signal 1: DAD1 B, Sig=254,4 Ref=360,100

| Peak # | RetTime [min] | Type | Width [min] | Area [mAU*s] | Height [mAU] | Area %  |
|--------|---------------|------|-------------|--------------|--------------|---------|
| 1      | 7.606         | BB   | 0.0914      | 6.02495      | 1.04301      | 0.3727  |
| 2      | 7.841         | BB   | 0.0892      | 6.19659      | 1.10918      | 0.3834  |
| 3      | 9.106         | BB   | 0.0903      | 1604.17664   | 273.87274    | 99.2439 |

Totals : 1616.39818 276.02493

Signal 2: DAD1 D, Sig=230,4 Ref=360,100

| Peak # | RetTime [min] | Type | Width [min] | Area [mAU*s] | Height [mAU] | Area %  |
|--------|---------------|------|-------------|--------------|--------------|---------|
| 1      | 7.377         | BB   | 0.0900      | 7.79954      | 1.37804      | 0.1830  |
| 2      | 7.607         | BB   | 0.0853      | 7.24946      | 1.33699      | 0.1701  |
| 3      | 7.840         | BB   | 0.0906      | 9.60503      | 1.63234      | 0.2254  |
| 4      | 9.106         | BB   | 0.0903      | 4192.09863   | 716.41174    | 98.3712 |
| 5      | 10.540        | BB   | 0.0935      | 12.47423     | 2.03410      | 0.2927  |
| 6      | 12.355        | BB   | 0.1147      | 7.26462      | 1.02450      | 0.1705  |
| 7      | 16.523        | BV   | 0.0998      | 8.53197      | 1.31391      | 0.2002  |
| 8      | 18.015        | BB   | 0.1022      | 16.48679     | 2.45886      | 0.3869  |

Totals : 4261.51027 727.59050

Signal 3: DAD1 E, Sig=280,4 Ref=360,100

| Peak # | RetTime [min] | Type | Width [min] | Area [mAU*s] | Height [mAU] | Area %   |
|--------|---------------|------|-------------|--------------|--------------|----------|
| 1      | 9.106         | BB   | 0.0902      | 2883.72827   | 493.02127    | 100.0000 |

Totals : 2883.72827 493.02127

=====  
\*\*\* End of Report \*\*\*

Sample Name: LC-0537

## Compound 22b

```
=====
Acq. Operator   : SYSTEM                      Seq. Line :   43
Acq. Instrument : CDD                        Location  :   Pl-E-08
Injection Date  : 7/21/2016 8:41:20 AM        Inj       :    1
                                           Inj Volume: 5.000 µl
Different Inj Volume from Sample Entry! Actual Inj Volume : 10.000 µl
Method         : C:\Chem32\1\Data\RD SIRT2 2016-07-20 16-41-09\RD VCP Methanol 40-100.M (
                Sequence Method)
Last changed    : 7/20/2016 4:41:10 PM by SYSTEM
Method Info     : test
=====
```

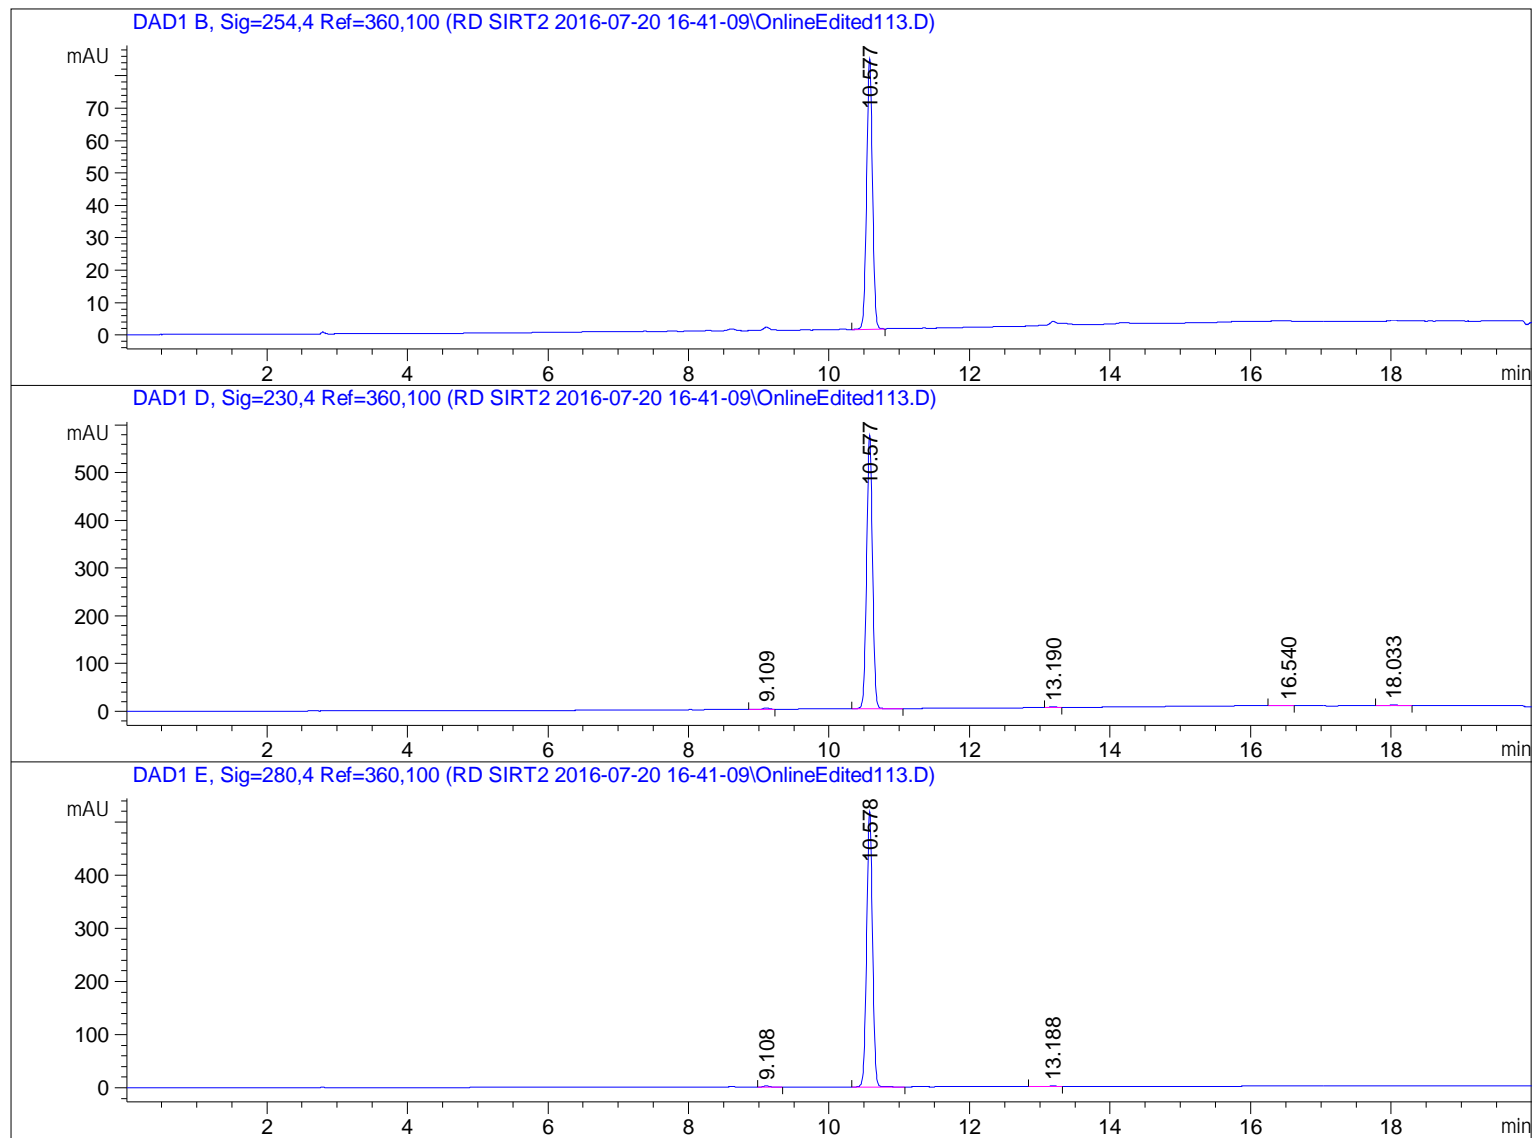

```
=====
Area Percent Report
=====
```

```
Sorted By      :      Signal
Multiplier     :      1.0000
Dilution       :      1.0000
Use Multiplier & Dilution Factor with ISTDs
```

Signal 1: DAD1 B, Sig=254,4 Ref=360,100

| Peak # | RetTime [min] | Type | Width [min] | Area [mAU*s] | Height [mAU] | Area %   |
|--------|---------------|------|-------------|--------------|--------------|----------|
| 1      | 10.577        | BB   | 0.0889      | 478.08603    | 83.41353     | 100.0000 |

Totals : 478.08603 83.41353

Signal 2: DAD1 D, Sig=230,4 Ref=360,100

| Peak # | RetTime [min] | Type | Width [min] | Area [mAU*s] | Height [mAU] | Area %  |
|--------|---------------|------|-------------|--------------|--------------|---------|
| 1      | 9.109         | BB   | 0.0926      | 16.32789     | 2.77571      | 0.4867  |
| 2      | 10.577        | BB   | 0.0893      | 3306.40918   | 573.17480    | 98.5506 |
| 3      | 13.190        | BB   | 0.0875      | 8.59849      | 1.53138      | 0.2563  |
| 4      | 16.540        | BV   | 0.1163      | 9.56588      | 1.15925      | 0.2851  |
| 5      | 18.033        | BB   | 0.1026      | 14.13674     | 2.09842      | 0.4214  |

Totals : 3355.03818 580.73956

Signal 3: DAD1 E, Sig=280,4 Ref=360,100

| Peak # | RetTime [min] | Type | Width [min] | Area [mAU*s] | Height [mAU] | Area %  |
|--------|---------------|------|-------------|--------------|--------------|---------|
| 1      | 9.108         | BB   | 0.0965      | 12.33896     | 1.98497      | 0.4105  |
| 2      | 10.578        | BB   | 0.0893      | 2986.01172   | 517.88837    | 99.3293 |
| 3      | 13.188        | BB   | 0.0925      | 7.82428      | 1.29566      | 0.2603  |

Totals : 3006.17495 521.16900

=====  
\*\*\* End of Report \*\*\*

Sample Name: LC-0534

## Compound 22c

```
=====
Acq. Operator   : SYSTEM                      Seq. Line :   44
Acq. Instrument : CDD                        Location  :   Pl-E-09
Injection Date  : 7/21/2016 9:04:09 AM        Inj       :    1
                                           Inj Volume: 5.000 µl
Different Inj Volume from Sample Entry! Actual Inj Volume : 10.000 µl
Method          : C:\Chem32\1\Data\RD SIRT2 2016-07-20 16-41-09\RD VCP Methanol 40-100.M (
                  Sequence Method)
Last changed    : 7/20/2016 4:41:10 PM by SYSTEM
Method Info     : test
=====
```

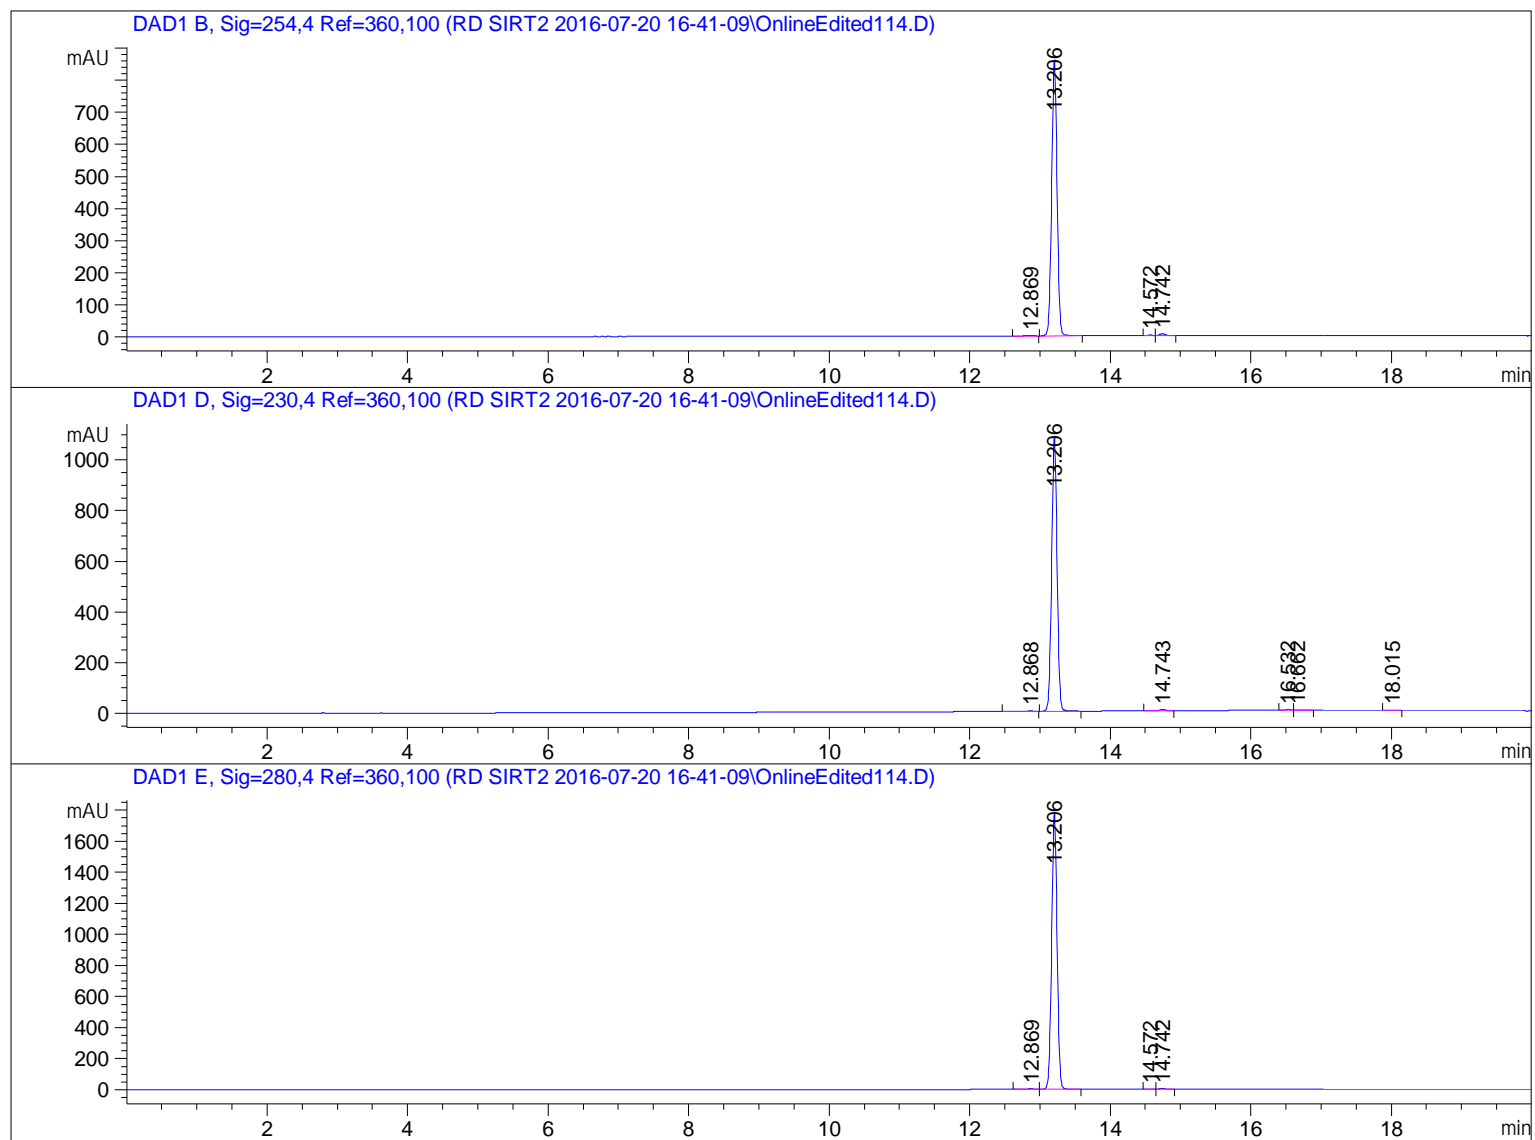

```
=====
                          Area Percent Report
=====
```

```
Sorted By           :      Signal
Multiplier          :      1.0000
Dilution            :      1.0000
Use Multiplier & Dilution Factor with ISTDs
```

Signal 1: DAD1 B, Sig=254,4 Ref=360,100

| Peak # | RetTime [min] | Type | Width [min] | Area [mAU*s] | Height [mAU] | Area %  |
|--------|---------------|------|-------------|--------------|--------------|---------|
| 1      | 12.869        | BB   | 0.0902      | 12.29304     | 2.04224      | 0.2657  |
| 2      | 13.206        | BB   | 0.0821      | 4575.25049   | 859.28052    | 98.8876 |
| 3      | 14.572        | BV   | 0.0763      | 8.16465      | 1.69185      | 0.1765  |
| 4      | 14.742        | VB   | 0.0809      | 31.01038     | 5.93868      | 0.6702  |

Totals : 4626.71856 868.95329

Signal 2: DAD1 D, Sig=230,4 Ref=360,100

| Peak # | RetTime [min] | Type | Width [min] | Area [mAU*s] | Height [mAU] | Area %  |
|--------|---------------|------|-------------|--------------|--------------|---------|
| 1      | 12.868        | BB   | 0.1018      | 13.54542     | 1.93116      | 0.2310  |
| 2      | 13.206        | BB   | 0.0822      | 5777.85645   | 1083.84375   | 98.5337 |
| 3      | 14.743        | VB R | 0.0864      | 28.74022     | 5.04623      | 0.4901  |
| 4      | 16.532        | VV   | 0.0997      | 18.02506     | 2.70627      | 0.3074  |
| 5      | 16.662        | VV   | 0.0995      | 13.36527     | 1.91238      | 0.2279  |
| 6      | 18.015        | BB   | 0.0953      | 12.30610     | 2.01241      | 0.2099  |

Totals : 5863.83851 1097.45220

Signal 3: DAD1 E, Sig=280,4 Ref=360,100

| Peak # | RetTime [min] | Type | Width [min] | Area [mAU*s] | Height [mAU] | Area %  |
|--------|---------------|------|-------------|--------------|--------------|---------|
| 1      | 12.869        | BB   | 0.0863      | 28.31993     | 4.98116      | 0.2963  |
| 2      | 13.206        | BB   | 0.0822      | 9481.54199   | 1778.20898   | 99.1996 |
| 3      | 14.572        | BV   | 0.0767      | 12.86234     | 2.64438      | 0.1346  |
| 4      | 14.742        | VB   | 0.0808      | 35.32034     | 6.77233      | 0.3695  |

Totals : 9558.04460 1792.60687

\*\*\* End of Report \*\*\*

|               |                      |             |                     |                 |                                            |                        |                      |
|---------------|----------------------|-------------|---------------------|-----------------|--------------------------------------------|------------------------|----------------------|
| Sample Name   | 2-32 hrms2           | Position    | 10                  | Instrument Name | Instrument 1                               | User Name              | Teng Ai              |
| Inj Vol       | 5                    | InjPosition |                     | SampleType      | Unknown                                    | IRM Calibration Status | Success              |
| Data Filename | 2-32 HRMS2-MMI_APCI_ | ACQ Method  | MMI_APCI_POSITIVE.M | Comment         | Easy-Access Method:<br>'MMI_APCI_POSITIVE' | Acquired Time          | 9/16/2011 3:33:42 PM |

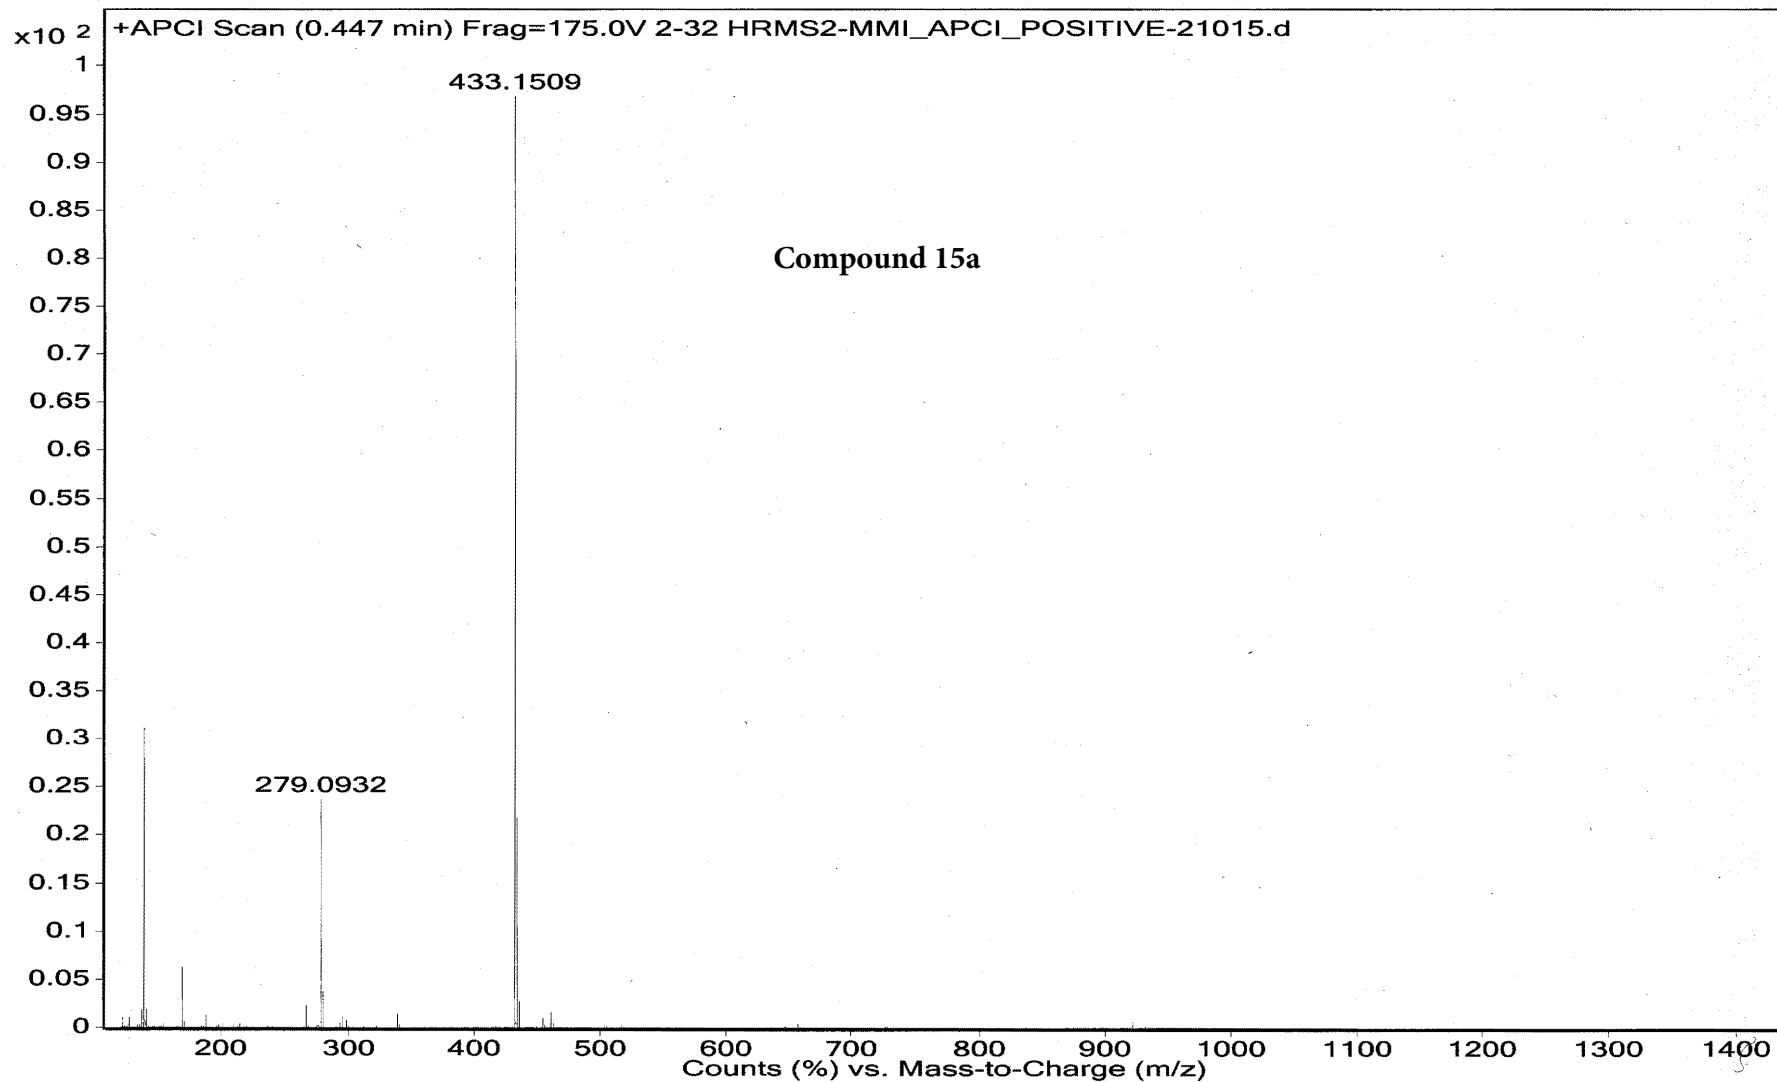

|               |                      |             |                     |                 |                                         |                        |                       |
|---------------|----------------------|-------------|---------------------|-----------------|-----------------------------------------|------------------------|-----------------------|
| Sample Name   | 3-91hmrs             | Position    | 59                  | Instrument Name | Instrument 1                            | User Name              | Teng Ai               |
| Inj Vol       | 5                    | InjPosition |                     | SampleType      | Unknown                                 | IRM Calibration Status | Success               |
| Data Filename | 3-91HMRS-MMI_APCI_PO | ACQ Method  | MMI_APCI_POSITIVE.M | Comment         | Easy-Access Method: 'MMI_APCI_POSITIVE' | Acquired Time          | 3/12/2012 10:26:50 AM |

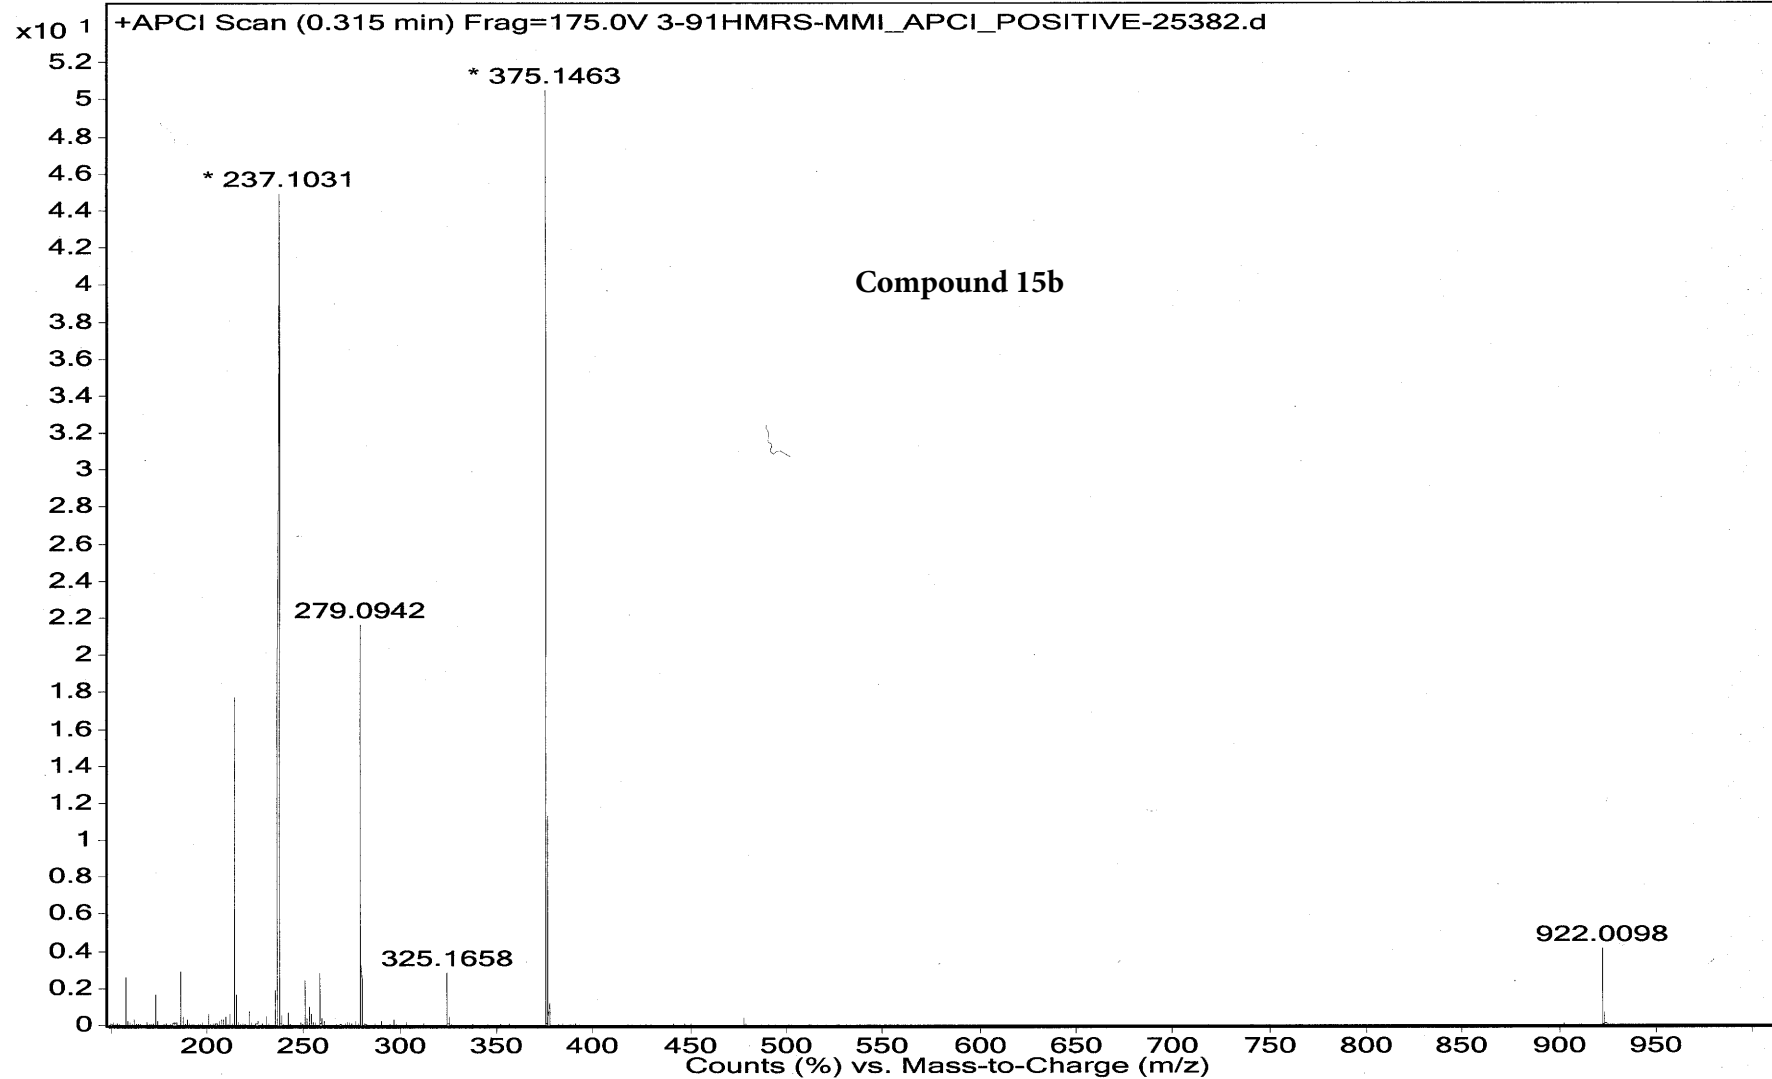

|               |                      |             |                     |                 |                                            |                        |                      |
|---------------|----------------------|-------------|---------------------|-----------------|--------------------------------------------|------------------------|----------------------|
| Sample Name   | 2-34 hrms2           | Position    | 11                  | Instrument Name | Instrument 1                               | User Name              | Teng Ai              |
| Inj Vol       | 5                    | InjPosition |                     | SampleType      | Unknown                                    | IRM Calibration Status | Success              |
| Data Filename | 2-34 HRMS2-MMI_APCI_ | ACQ Method  | MMI_APCI_POSITIVE.M | Comment         | Easy-Access Method:<br>'MMI_APCI_POSITIVE' | Acquired Time          | 9/16/2011 3:38:52 PM |

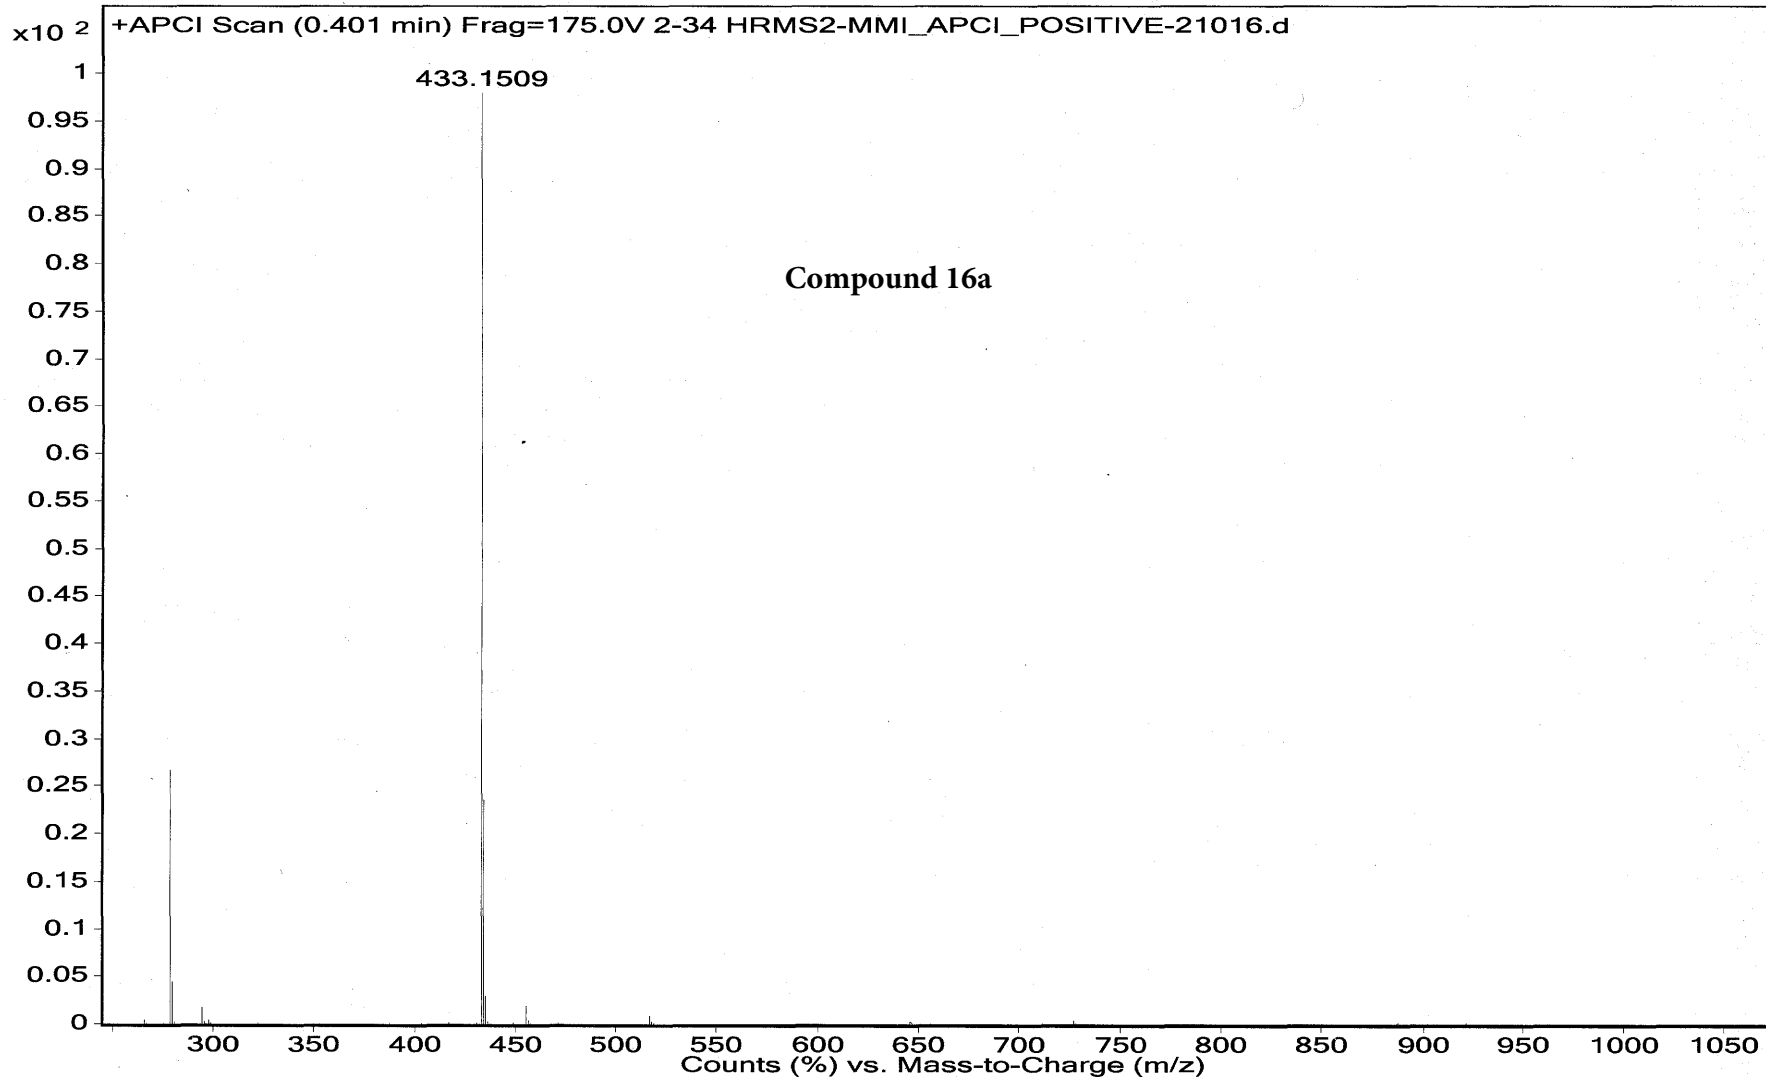



|                      |                          |                    |                     |                        |                                            |                               |                       |
|----------------------|--------------------------|--------------------|---------------------|------------------------|--------------------------------------------|-------------------------------|-----------------------|
| <b>Sample Name</b>   | 3-119hrms                | <b>Position</b>    | 16                  | <b>Instrument Name</b> | Instrument 1                               | <b>User Name</b>              | Teng Ai               |
| <b>Inj Vol</b>       | 10                       | <b>InjPosition</b> |                     | <b>SampleType</b>      | Unknown                                    | <b>IRM Calibration Status</b> | Success               |
| <b>Data Filename</b> | 3-119HRMS-<br>MMI_APCI_P | <b>ACQ Method</b>  | MMI_APCI_POSITIVE.M | <b>Comment</b>         | Easy-Access Method:<br>'MMI_APCI_POSITIVE' | <b>Acquired Time</b>          | 3/22/2012 12:51:11 PM |

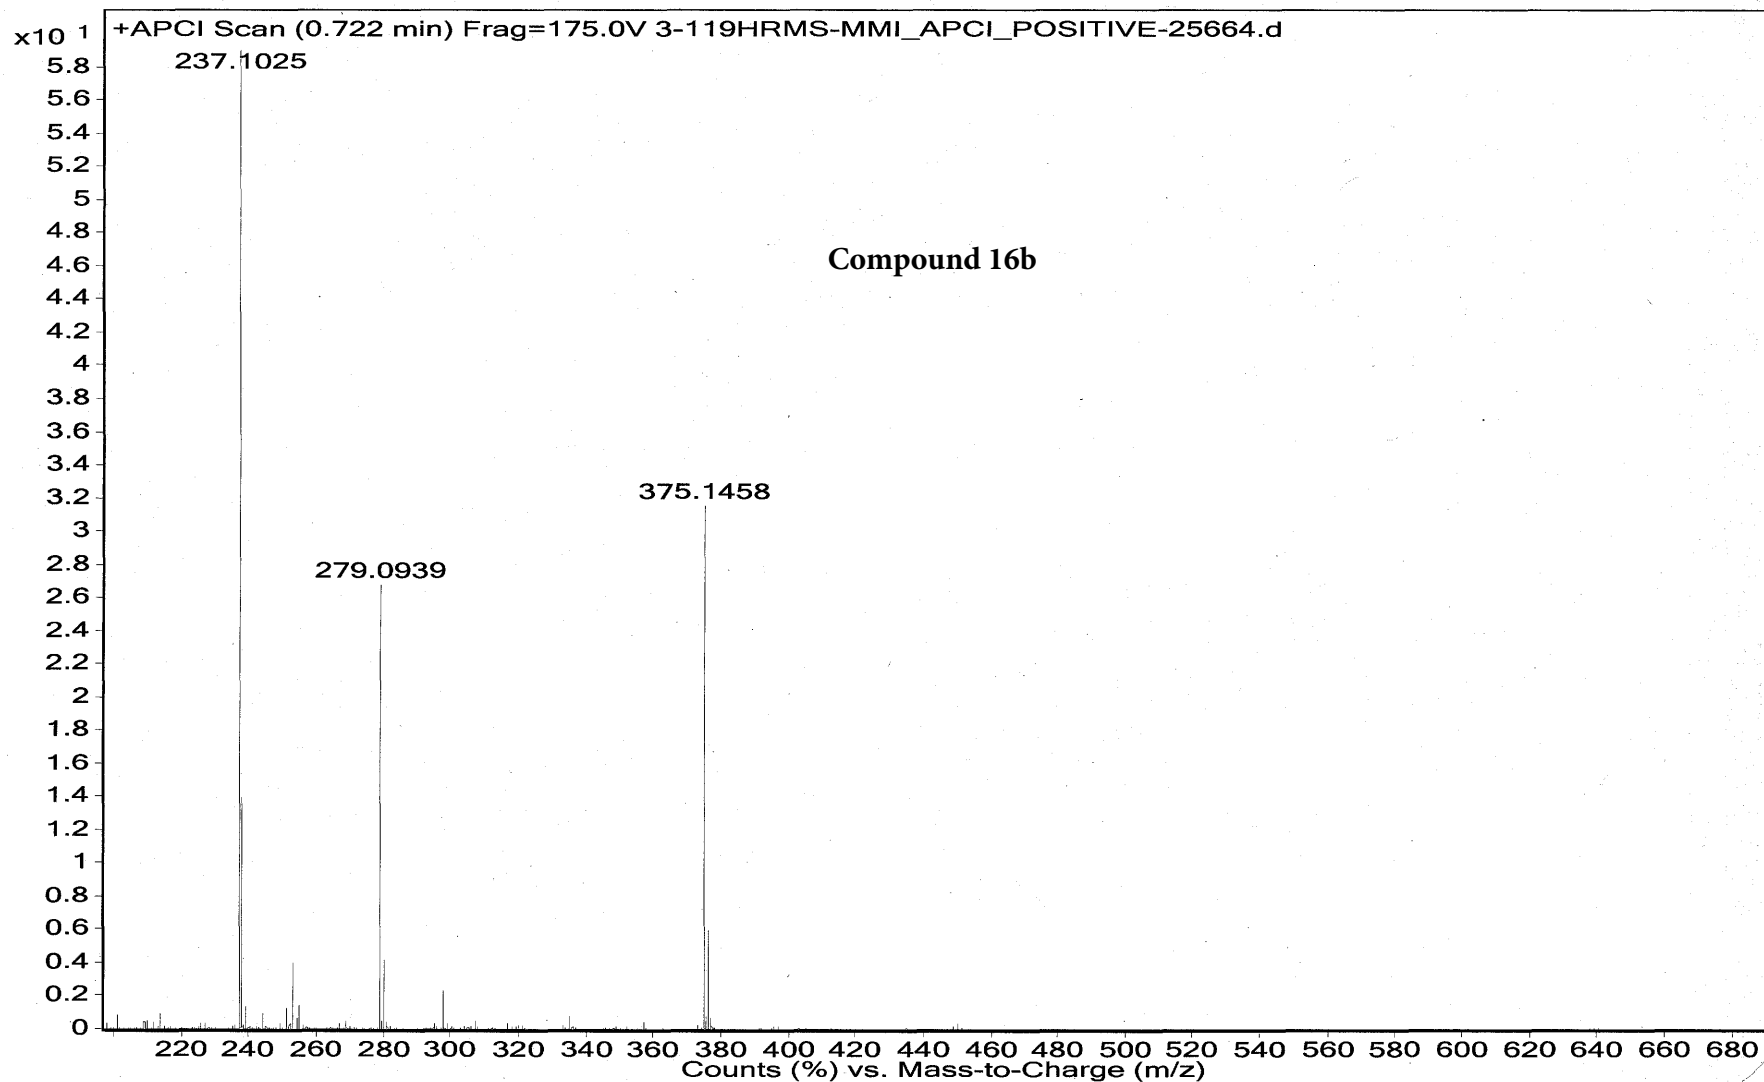

|               |                      |             |                     |                 |                                            |                        |                        |
|---------------|----------------------|-------------|---------------------|-----------------|--------------------------------------------|------------------------|------------------------|
| Sample Name   | 3-42                 | Position    | 44                  | Instrument Name | Instrument 1                               | User Name              | Teng Ai                |
| Inj Vol       | 10                   | InjPosition |                     | SampleType      | Unknown                                    | IRM Calibration Status | Success                |
| Data Filename | 3-42-MMI_APCI_POSITI | ACQ Method  | MMI_APCI_POSITIVE.M | Comment         | Easy-Access Method:<br>'MMI_APCI_POSITIVE' | Acquired Time          | 10/28/2011 12:06:44 PM |

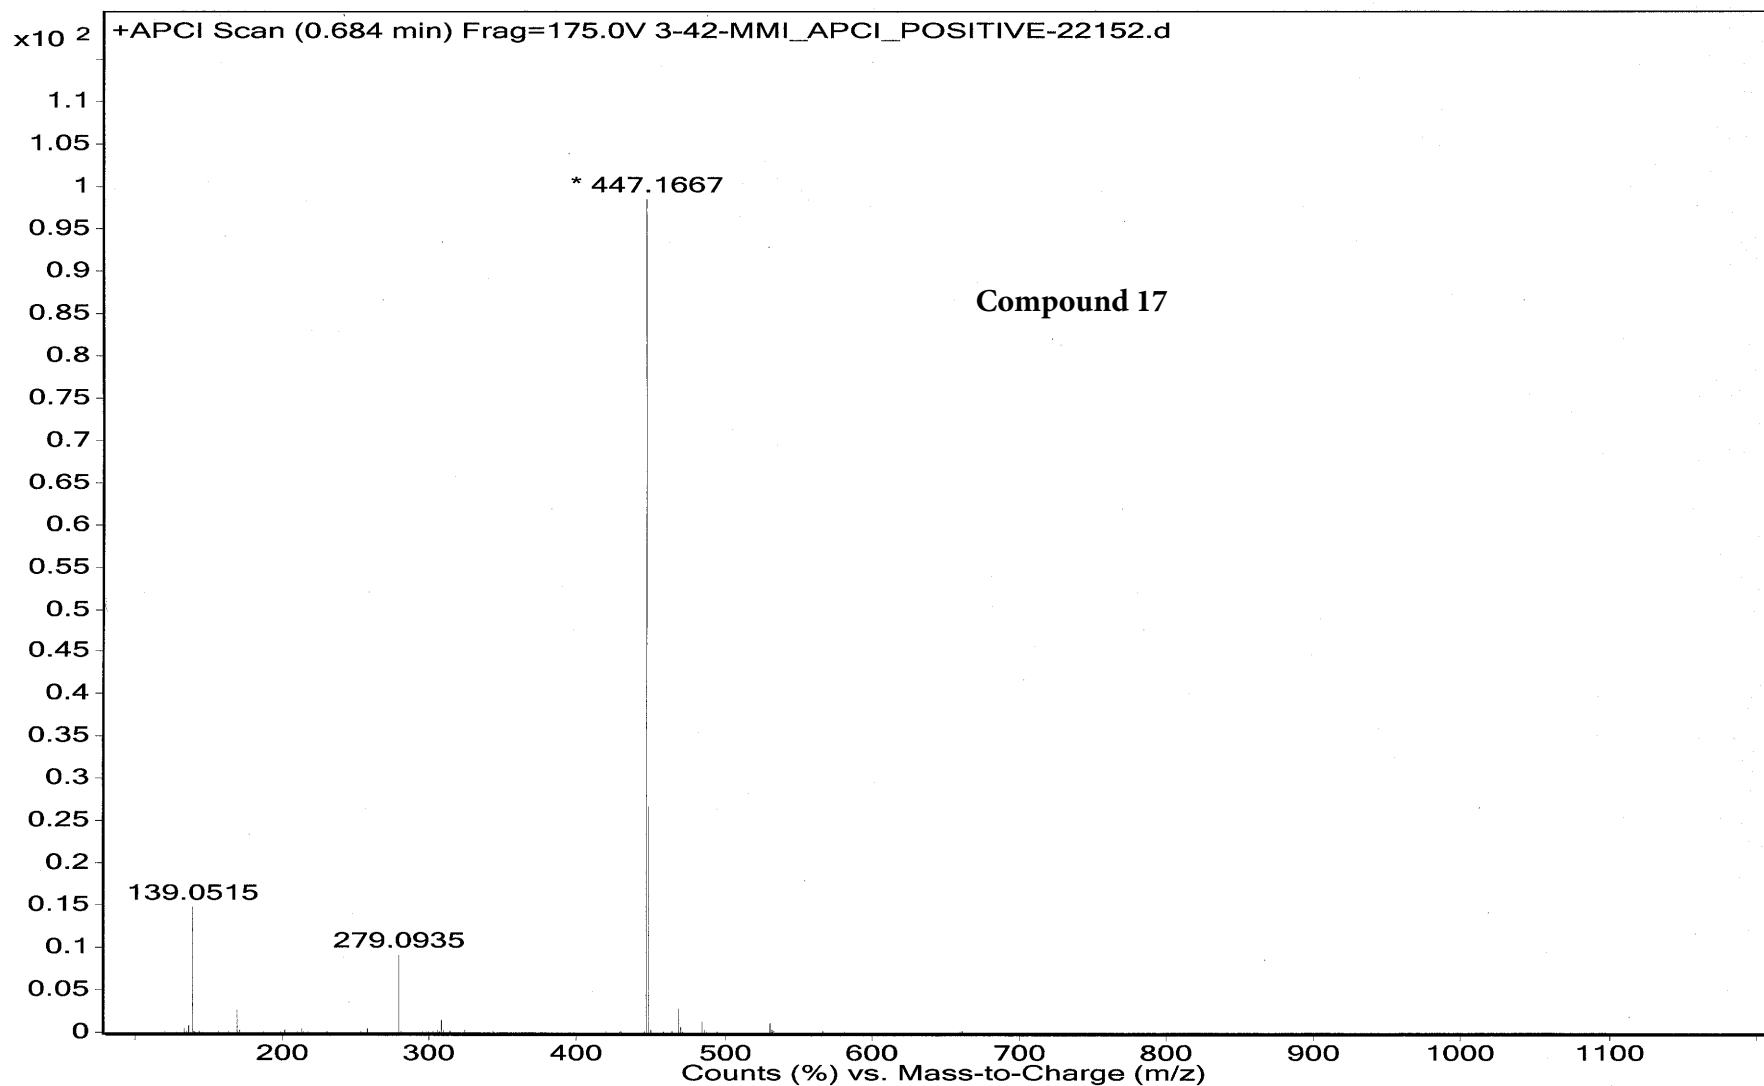

|                      |                          |                    |                     |                        |                                            |                               |                       |
|----------------------|--------------------------|--------------------|---------------------|------------------------|--------------------------------------------|-------------------------------|-----------------------|
| <b>Sample Name</b>   | 3-37hrms                 | <b>Position</b>    | 57                  | <b>Instrument Name</b> | Instrument 1                               | <b>User Name</b>              | Teng Ai               |
| <b>Inj Vol</b>       | 5                        | <b>InjPosition</b> |                     | <b>SampleType</b>      | Unknown                                    | <b>IRM Calibration Status</b> | Success               |
| <b>Data Filename</b> | 3-37HRMS-<br>MMI_APCI_PO | <b>ACQ Method</b>  | MMI_APCI_POSITIVE.M | <b>Comment</b>         | Easy-Access Method:<br>'MMI_APCI_POSITIVE' | <b>Acquired Time</b>          | 10/11/2011 5:14:19 PM |

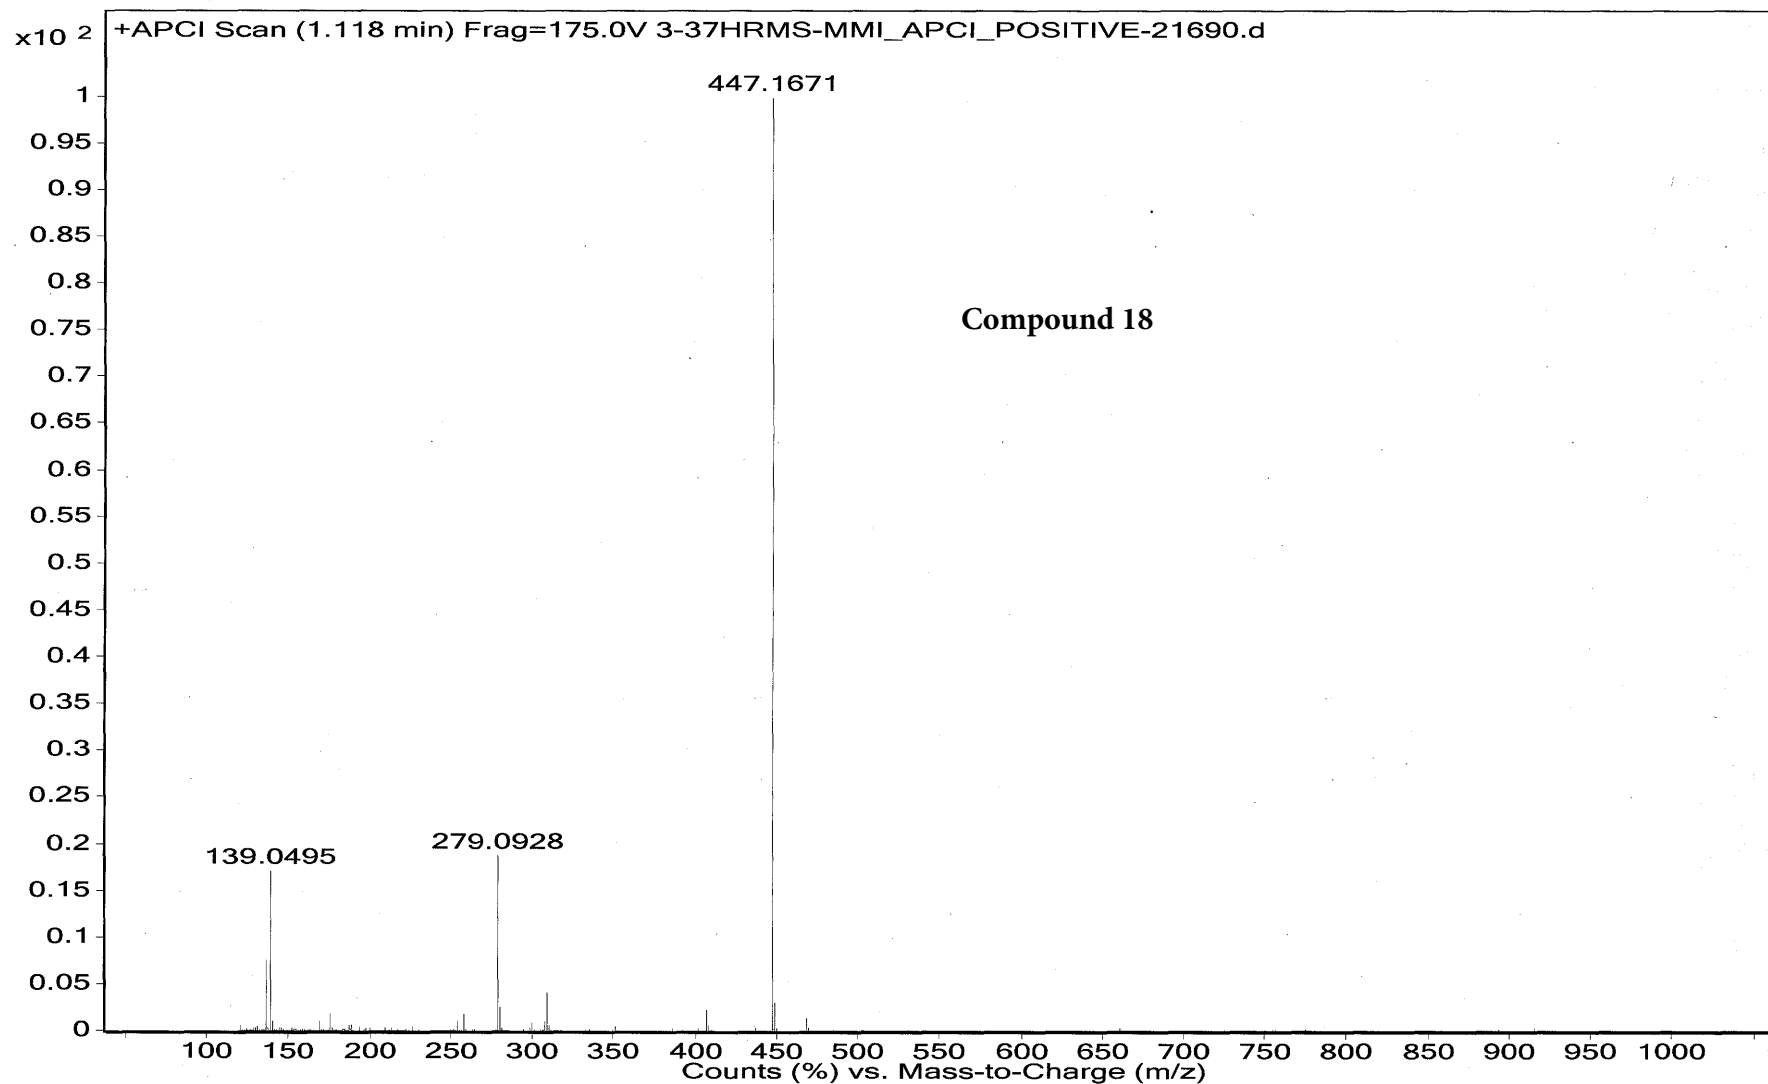

|               |                          |             |                     |                 |                                            |                        |                       |
|---------------|--------------------------|-------------|---------------------|-----------------|--------------------------------------------|------------------------|-----------------------|
| Sample Name   | 3-150hrms                | Position    | 12                  | Instrument Name | Instrument 1                               | User Name              | Teng Ai               |
| Inj Vol       | 5                        | InjPosition |                     | SampleType      | Unknown                                    | IRM Calibration Status | Success               |
| Data Filename | 3-150HRMS-<br>MMI_APCI_P | ACQ Method  | MMI_APCI_POSITIVE.M | Comment         | Easy-Access Method:<br>'MMI_APCI_POSITIVE' | Acquired Time          | 4/25/2012 12:51:11 PM |

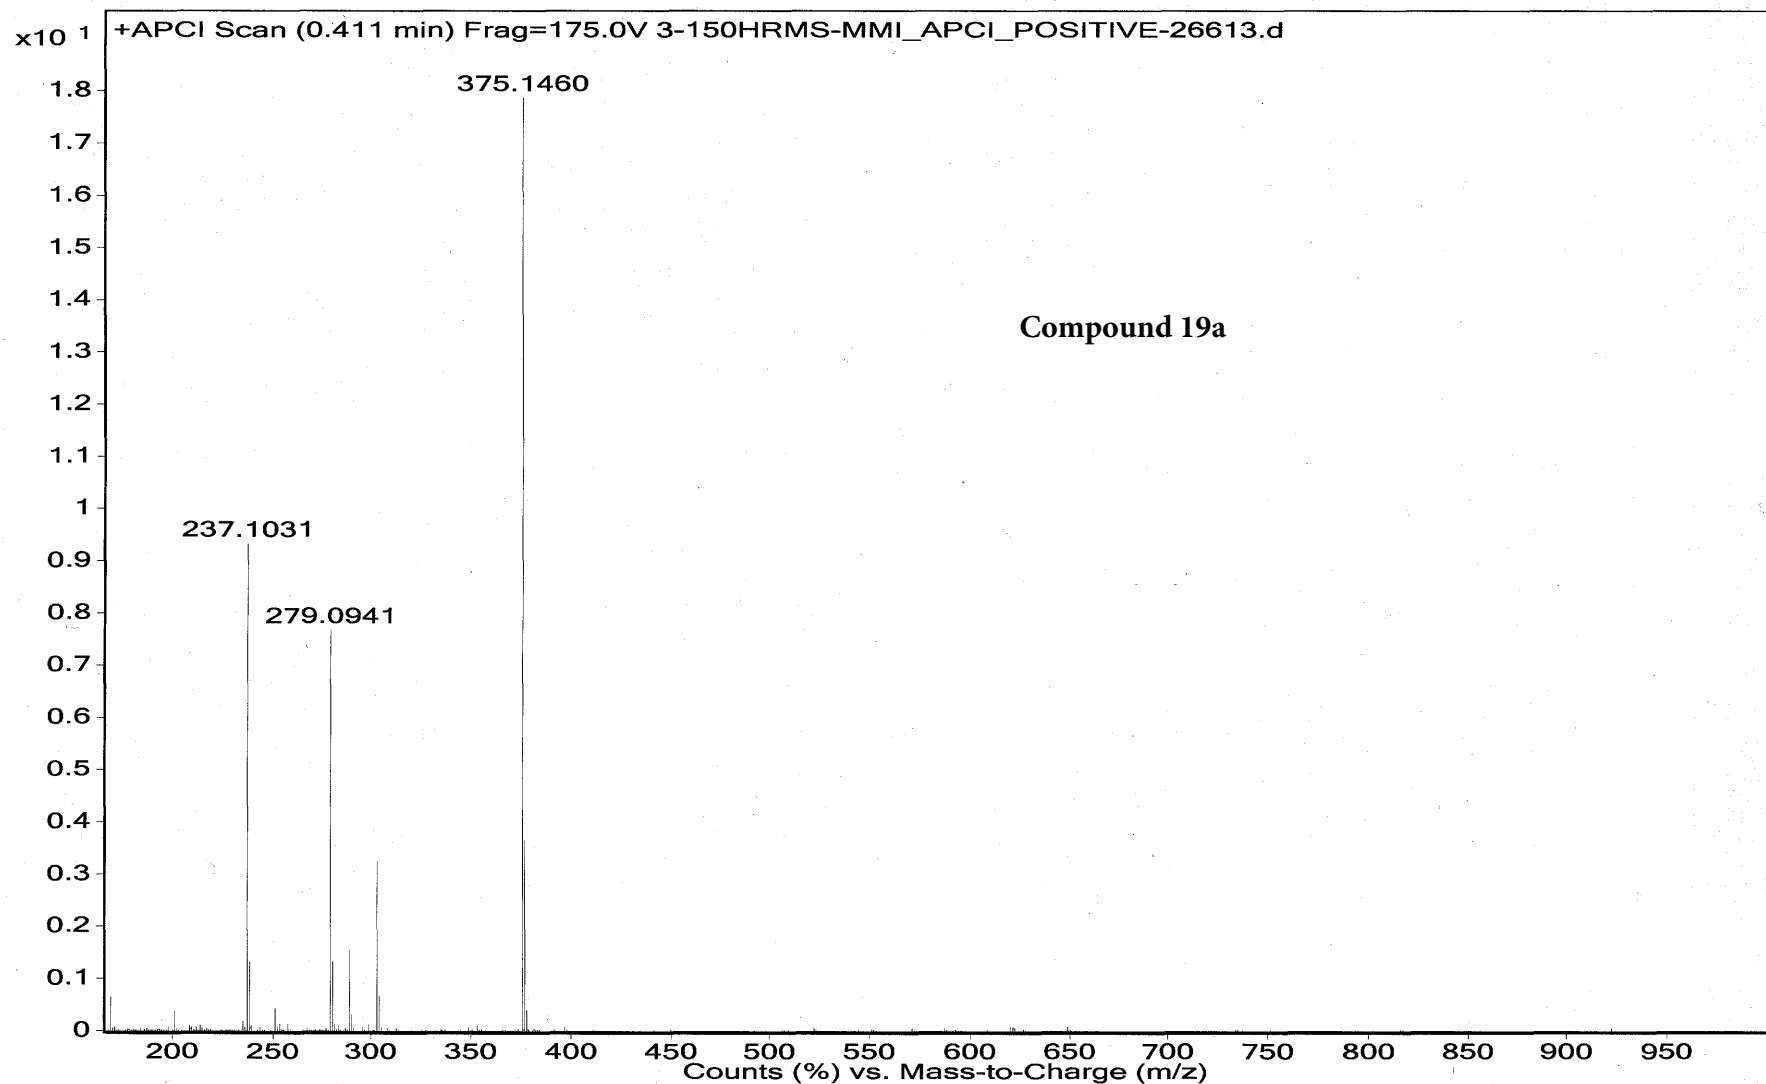

|                      |                          |                    |                     |                        |                                            |                               |                     |
|----------------------|--------------------------|--------------------|---------------------|------------------------|--------------------------------------------|-------------------------------|---------------------|
| <b>Sample Name</b>   | 3-151hrms                | <b>Position</b>    | 28                  | <b>Instrument Name</b> | Instrument 1                               | <b>User Name</b>              | Teng Ai             |
| <b>Inj Vol</b>       | 5                        | <b>InjPosition</b> |                     | <b>SampleType</b>      | Unknown                                    | <b>IRM Calibration Status</b> | Success             |
| <b>Data Filename</b> | 3-151HRMS-<br>MMI_APCI_P | <b>ACQ Method</b>  | MMI_APCI_POSITIVE.M | <b>Comment</b>         | Easy-Access Method:<br>'MMI_APCI_POSITIVE' | <b>Acquired Time</b>          | 5/9/2012 2:34:49 PM |

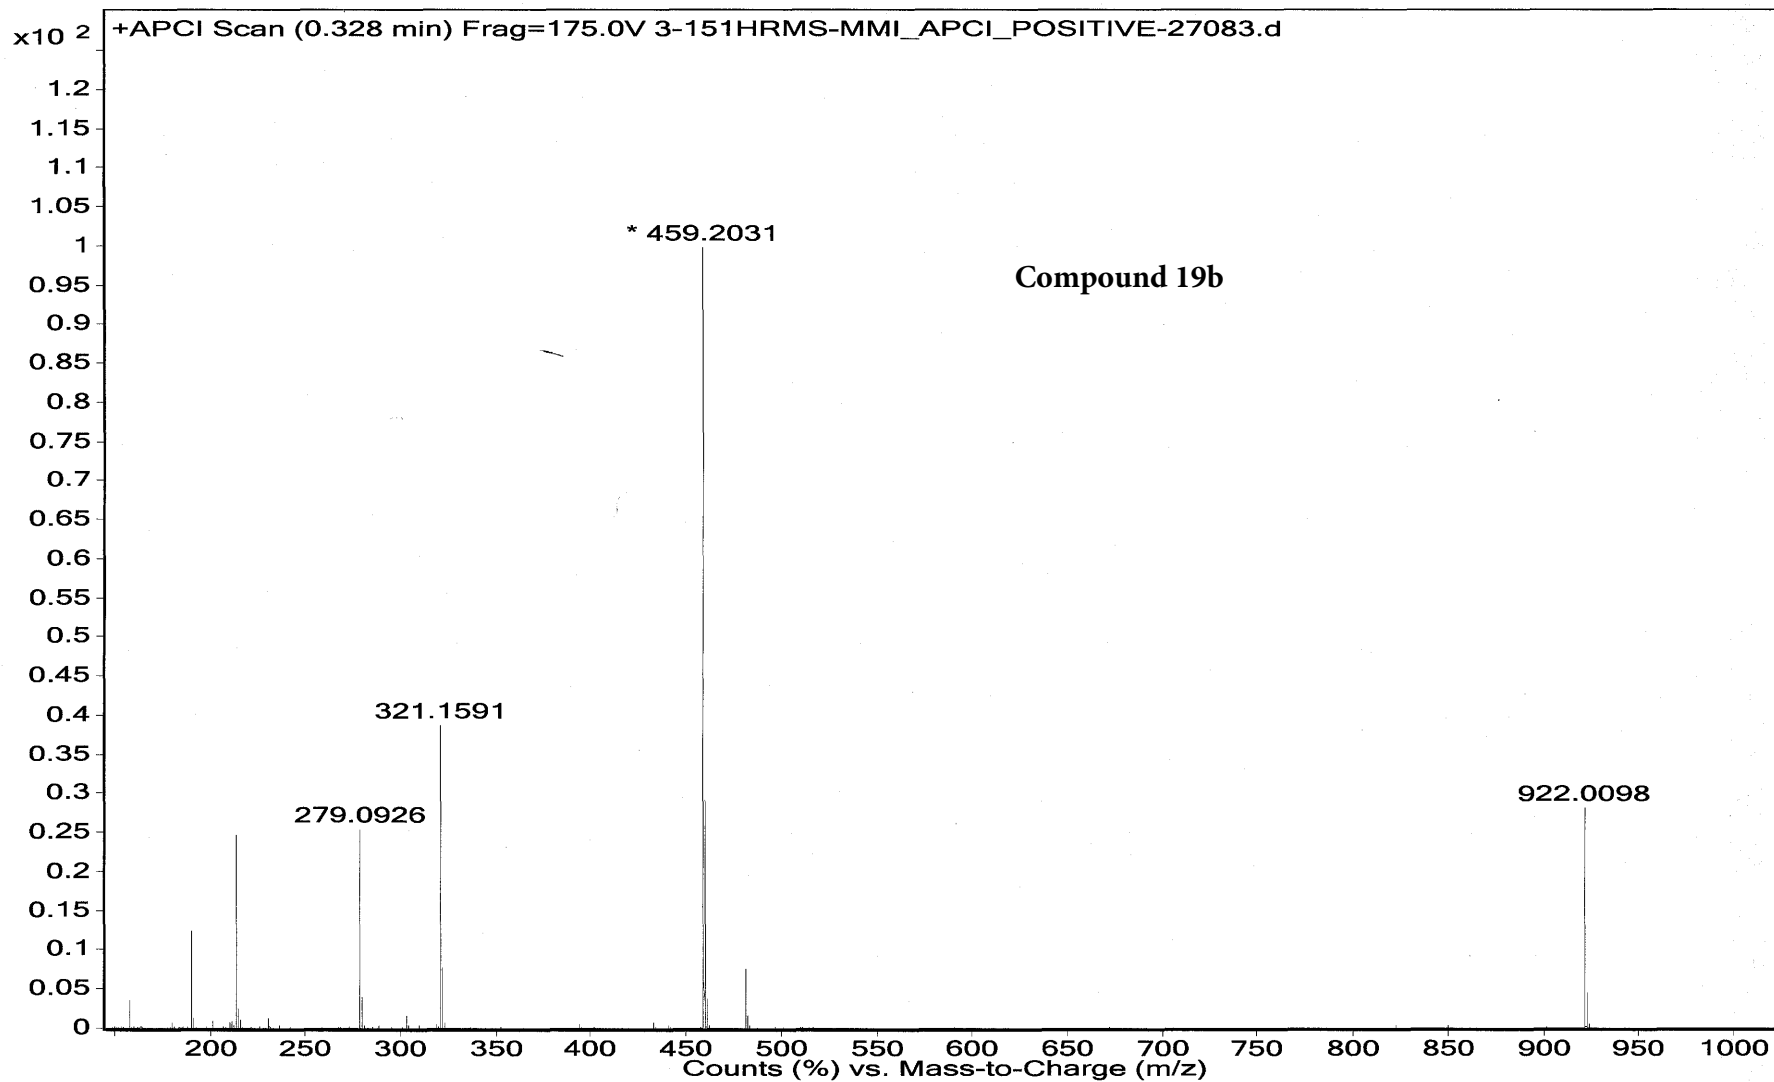

|               |                      |             |                     |                 |                                         |                        |                      |
|---------------|----------------------|-------------|---------------------|-----------------|-----------------------------------------|------------------------|----------------------|
| Sample Name   | 3-163hrms            | Position    | 14                  | Instrument Name | Instrument 1                            | User Name              | Teng Ai              |
| Inj Vol       | 5                    | InjPosition |                     | SampleType      | Unknown                                 | IRM Calibration Status | Success              |
| Data Filename | 3-163HRMS-MMI_APCI_P | ACQ Method  | MMI_APCI_POSITIVE.M | Comment         | Easy-Access Method: 'MMI_APCI_POSITIVE' | Acquired Time          | 4/25/2012 1:01:45 PM |

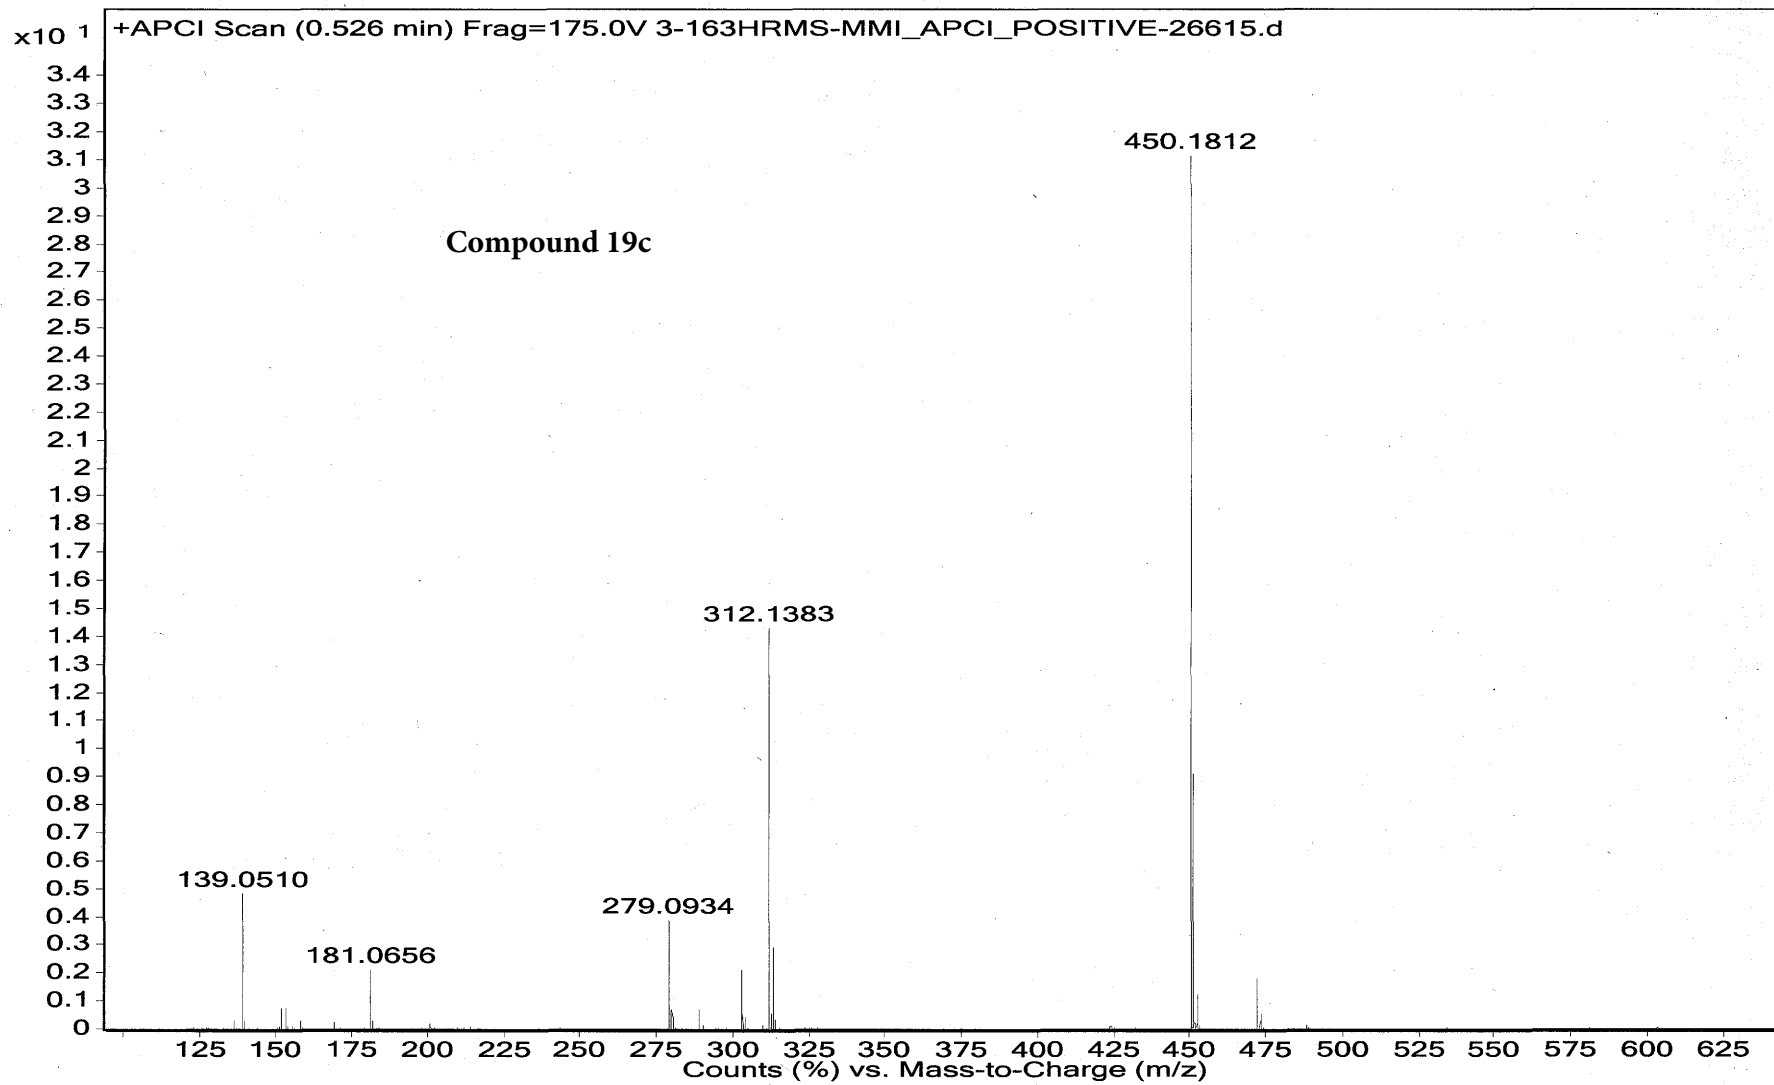

|                      |                          |                    |                     |                        |                                            |                               |                     |
|----------------------|--------------------------|--------------------|---------------------|------------------------|--------------------------------------------|-------------------------------|---------------------|
| <b>Sample Name</b>   | 3-152hrms                | <b>Position</b>    | 57                  | <b>Instrument Name</b> | Instrument 1                               | <b>User Name</b>              | Teng Ai             |
| <b>Inj Vol</b>       | 5                        | <b>InjPosition</b> |                     | <b>SampleType</b>      | Unknown                                    | <b>IRM Calibration Status</b> | Success             |
| <b>Data Filename</b> | 3-152HRMS-<br>MMI_APCI_P | <b>ACQ Method</b>  | MMI_APCI_POSITIVE.M | <b>Comment</b>         | Easy-Access Method:<br>'MMI_APCI_POSITIVE' | <b>Acquired Time</b>          | 5/2/2012 6:04:15 PM |

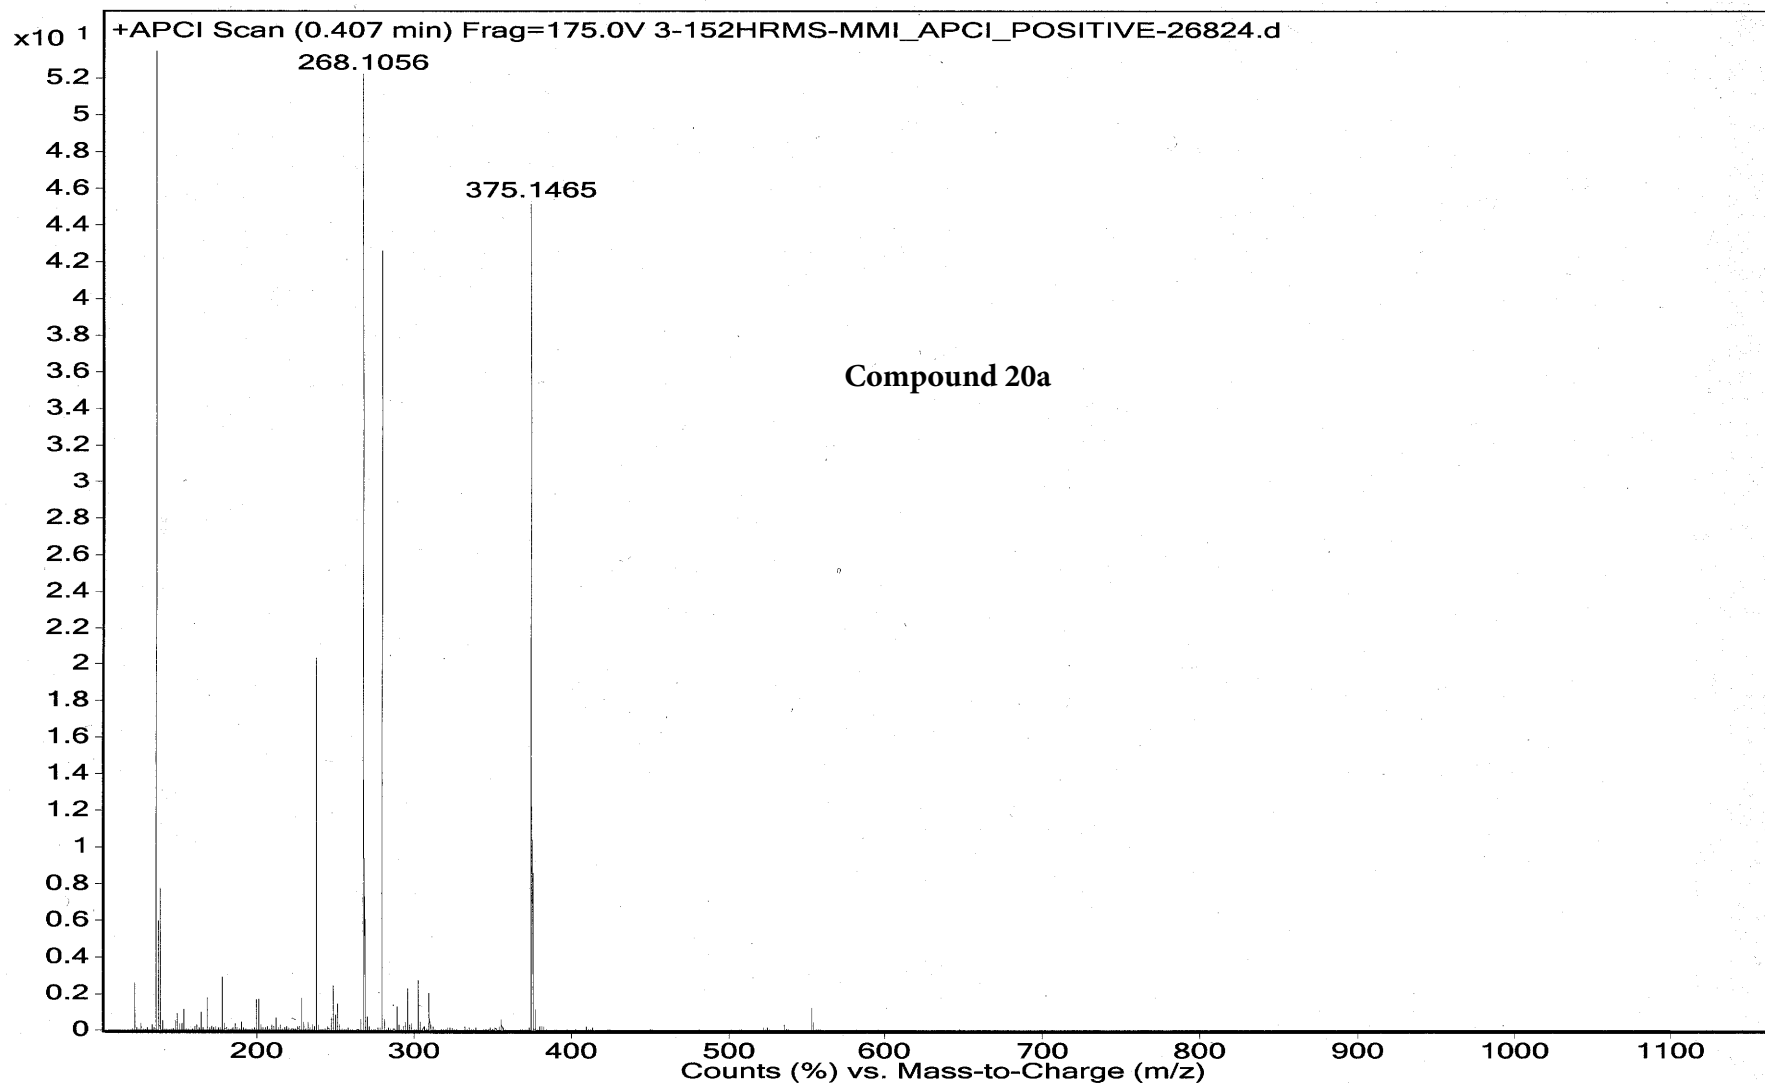

|                      |                          |                    |                     |                        |                                            |                               |                      |
|----------------------|--------------------------|--------------------|---------------------|------------------------|--------------------------------------------|-------------------------------|----------------------|
| <b>Sample Name</b>   | 3-153hrms                | <b>Position</b>    | 52                  | <b>Instrument Name</b> | Instrument 1                               | <b>User Name</b>              | Teng Ai              |
| <b>Inj Vol</b>       | 5                        | <b>InjPosition</b> |                     | <b>SampleType</b>      | Unknown                                    | <b>IRM Calibration Status</b> | Success              |
| <b>Data Filename</b> | 3-153HRMS-<br>MMI_APCI_P | <b>ACQ Method</b>  | MMI_APCI_POSITIVE.M | <b>Comment</b>         | Easy-Access Method:<br>'MMI_APCI_POSITIVE' | <b>Acquired Time</b>          | 5/30/2012 4:14:13 PM |

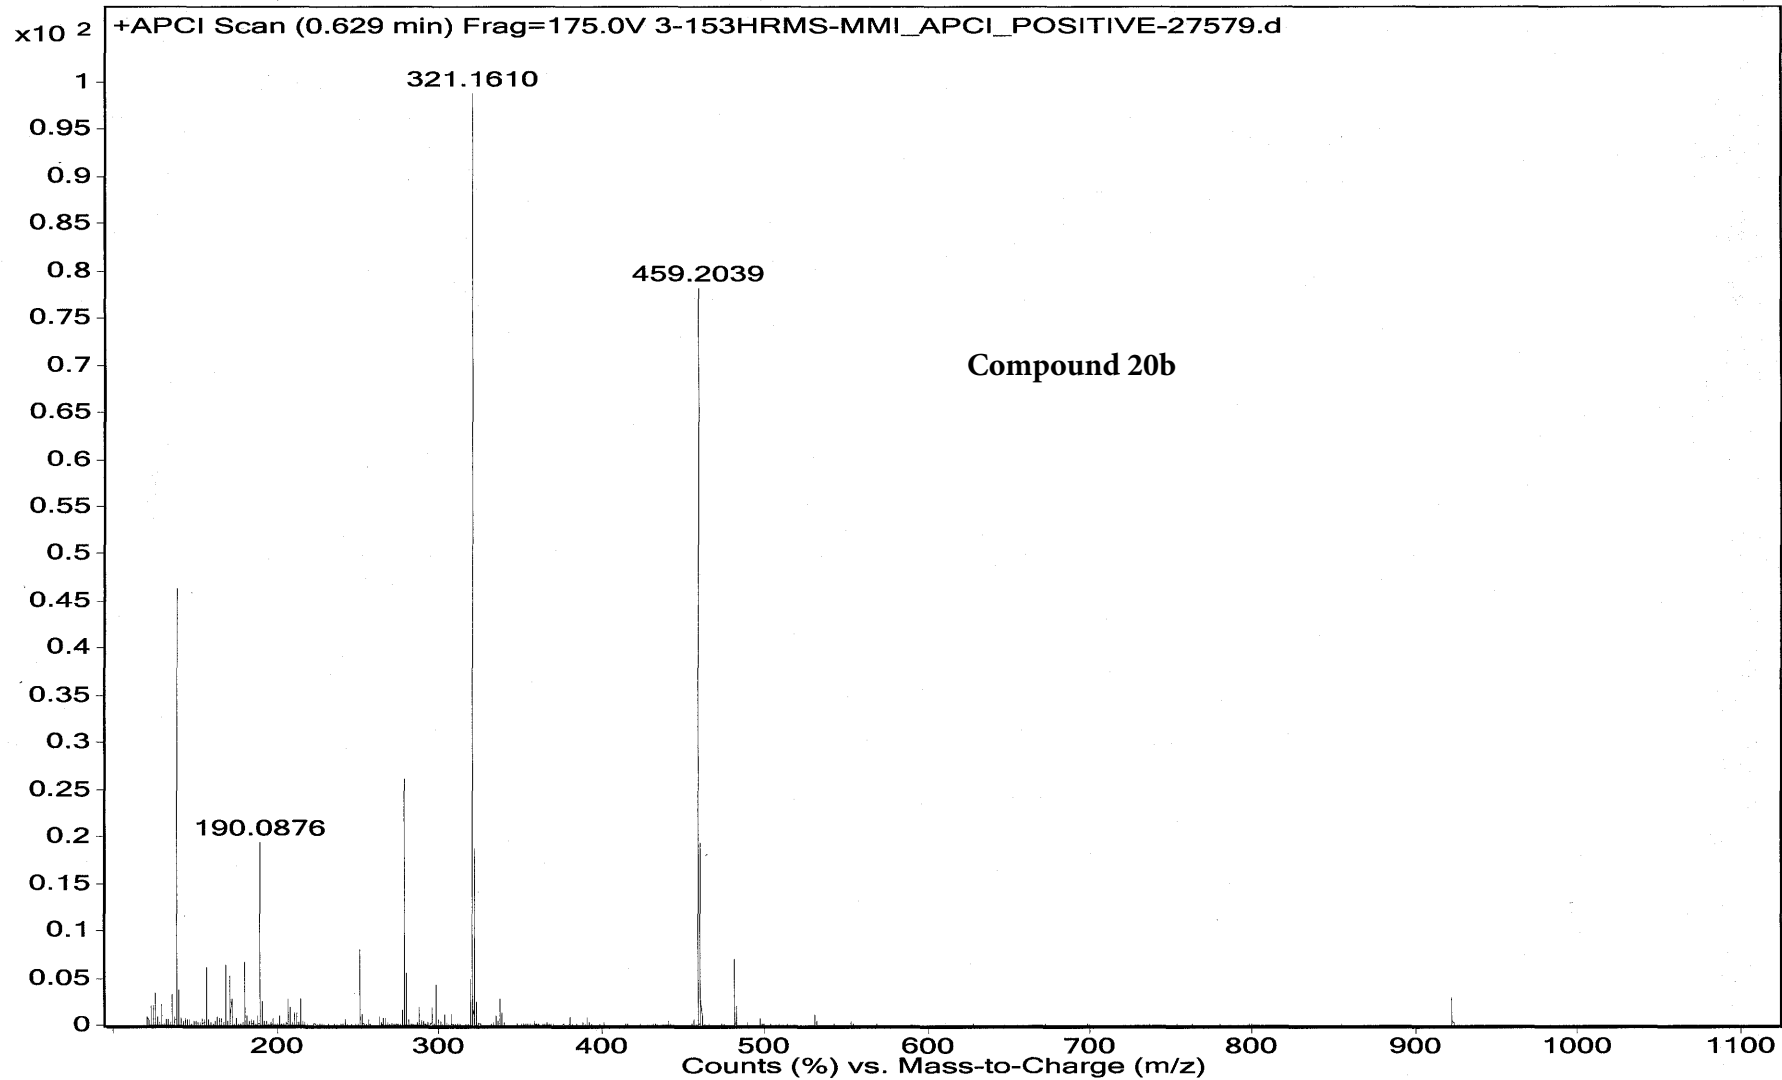



|               |                      |             |                     |                 |                                            |                        |                      |
|---------------|----------------------|-------------|---------------------|-----------------|--------------------------------------------|------------------------|----------------------|
| Sample Name   | 3-194                | Position    | 55                  | Instrument Name | Instrument 1                               | User Name              | Teng Ai              |
| Inj Vol       | 10                   | InjPosition |                     | SampleType      | Unknown                                    | IRM Calibration Status | Success              |
| Data Filename | 3-194-MMI_APCI_POSIT | ACQ Method  | MMI_APCI_POSITIVE.M | Comment         | Easy-Access Method:<br>'MMI_APCI_POSITIVE' | Acquired Time          | 9/30/2013 3:38:46 PM |

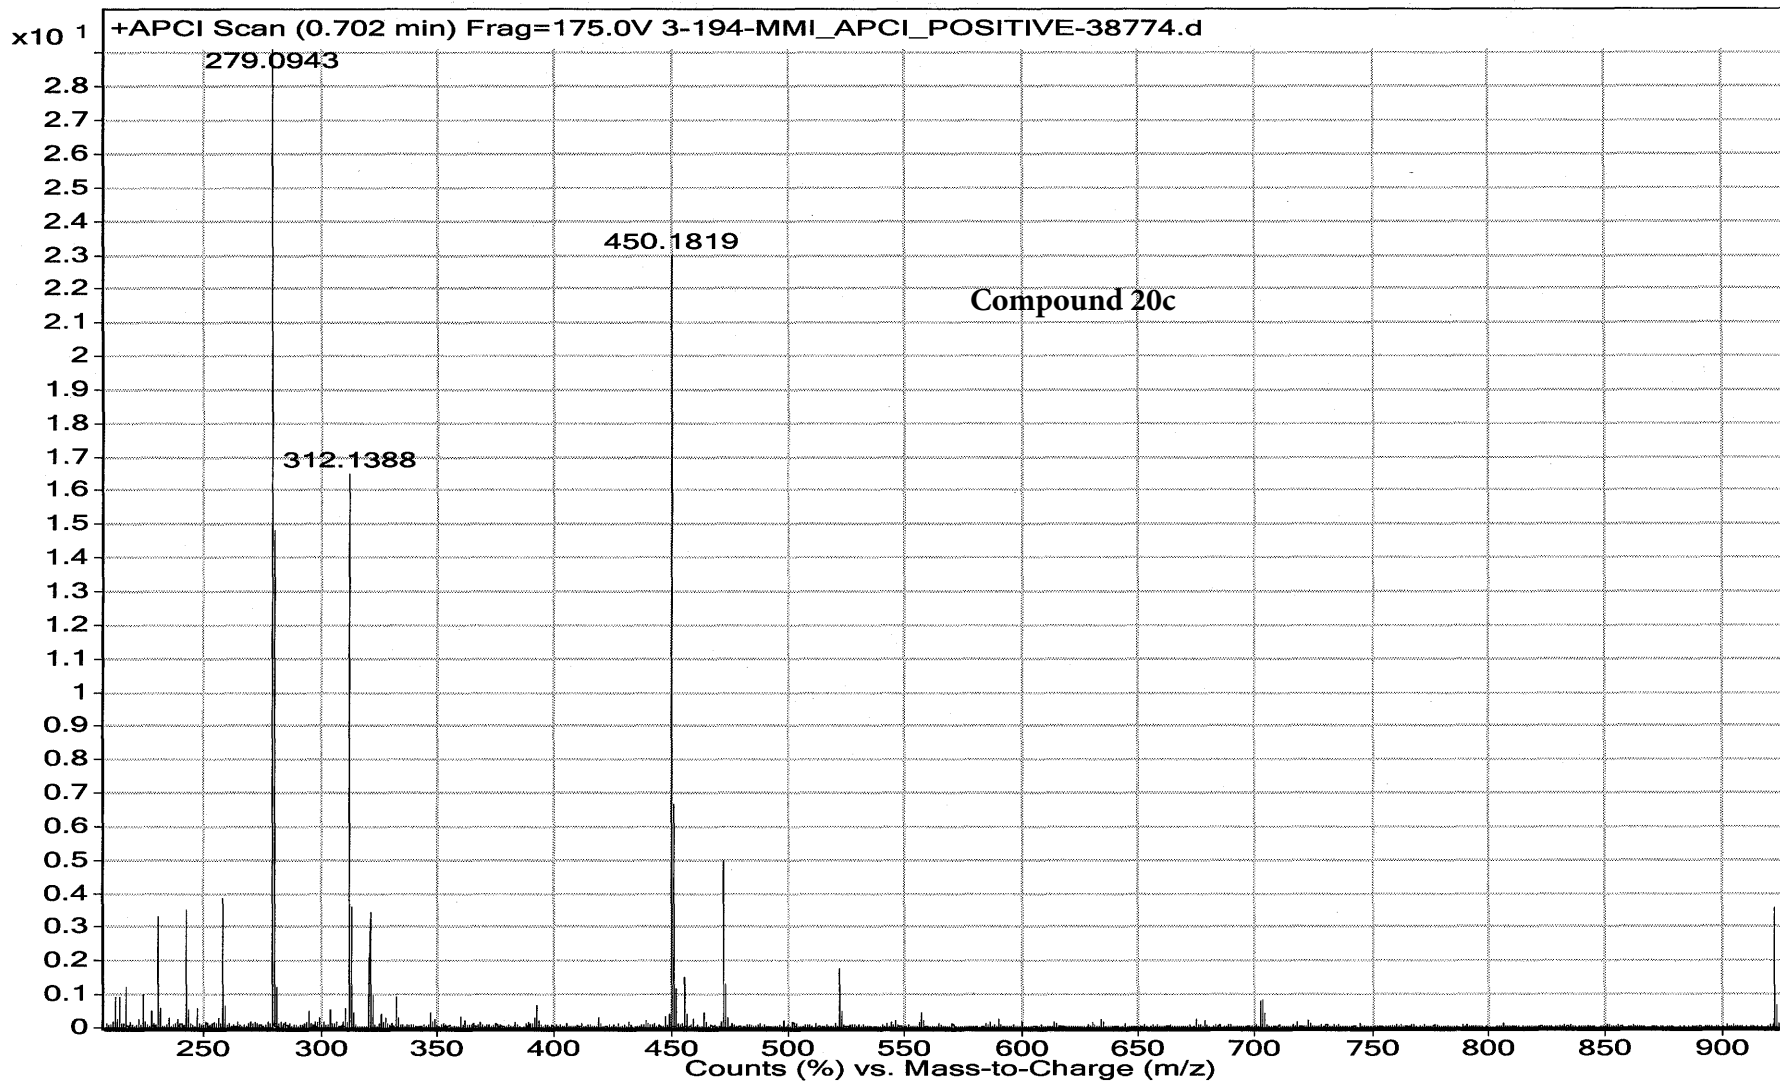

|                      |                          |                    |                     |                        |                                            |                               |                      |
|----------------------|--------------------------|--------------------|---------------------|------------------------|--------------------------------------------|-------------------------------|----------------------|
| <b>Sample Name</b>   | 3-165hrms                | <b>Position</b>    | 42                  | <b>Instrument Name</b> | Instrument 1                               | <b>User Name</b>              | Teng Ai              |
| <b>Inj Vol</b>       | 5                        | <b>InjPosition</b> |                     | <b>SampleType</b>      | Unknown                                    | <b>IRM Calibration Status</b> | Success              |
| <b>Data Filename</b> | 3-165HRMS-<br>MMI_APCI_P | <b>ACQ Method</b>  | MMI_APCI_POSITIVE.M | <b>Comment</b>         | Easy-Access Method:<br>'MMI_APCI_POSITIVE' | <b>Acquired Time</b>          | 5/8/2012 11:34:24 AM |

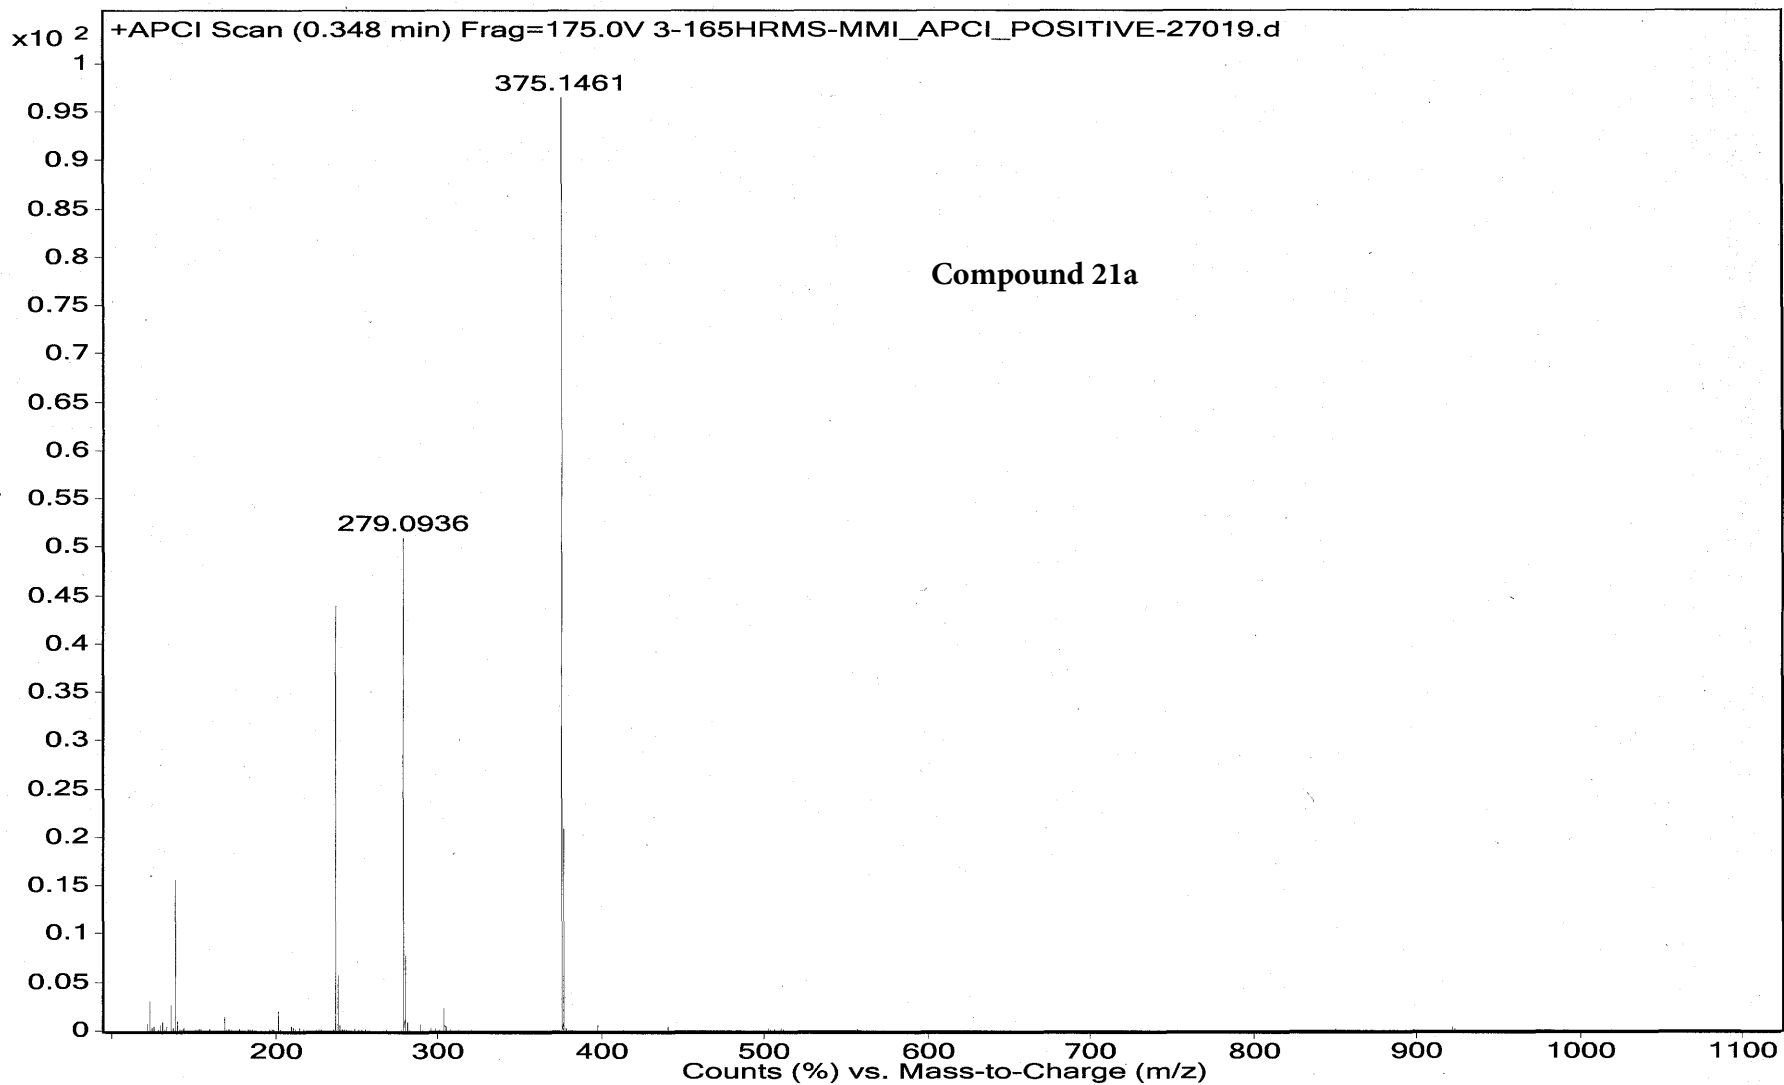

|                      |                          |                    |                     |                        |                                            |                               |                     |
|----------------------|--------------------------|--------------------|---------------------|------------------------|--------------------------------------------|-------------------------------|---------------------|
| <b>Sample Name</b>   | 3-166hrms                | <b>Position</b>    | 25                  | <b>Instrument Name</b> | Instrument 1                               | <b>User Name</b>              | Teng Ai             |
| <b>Inj Vol</b>       | 5                        | <b>InjPosition</b> |                     | <b>SampleType</b>      | Unknown                                    | <b>IRM Calibration Status</b> | Success             |
| <b>Data Filename</b> | 3-166HRMS-<br>MMI_APCI_P | <b>ACQ Method</b>  | MMI_APCI_POSITIVE.M | <b>Comment</b>         | Easy-Access Method:<br>'MMI_APCI_POSITIVE' | <b>Acquired Time</b>          | 5/1/2012 6:00:28 PM |

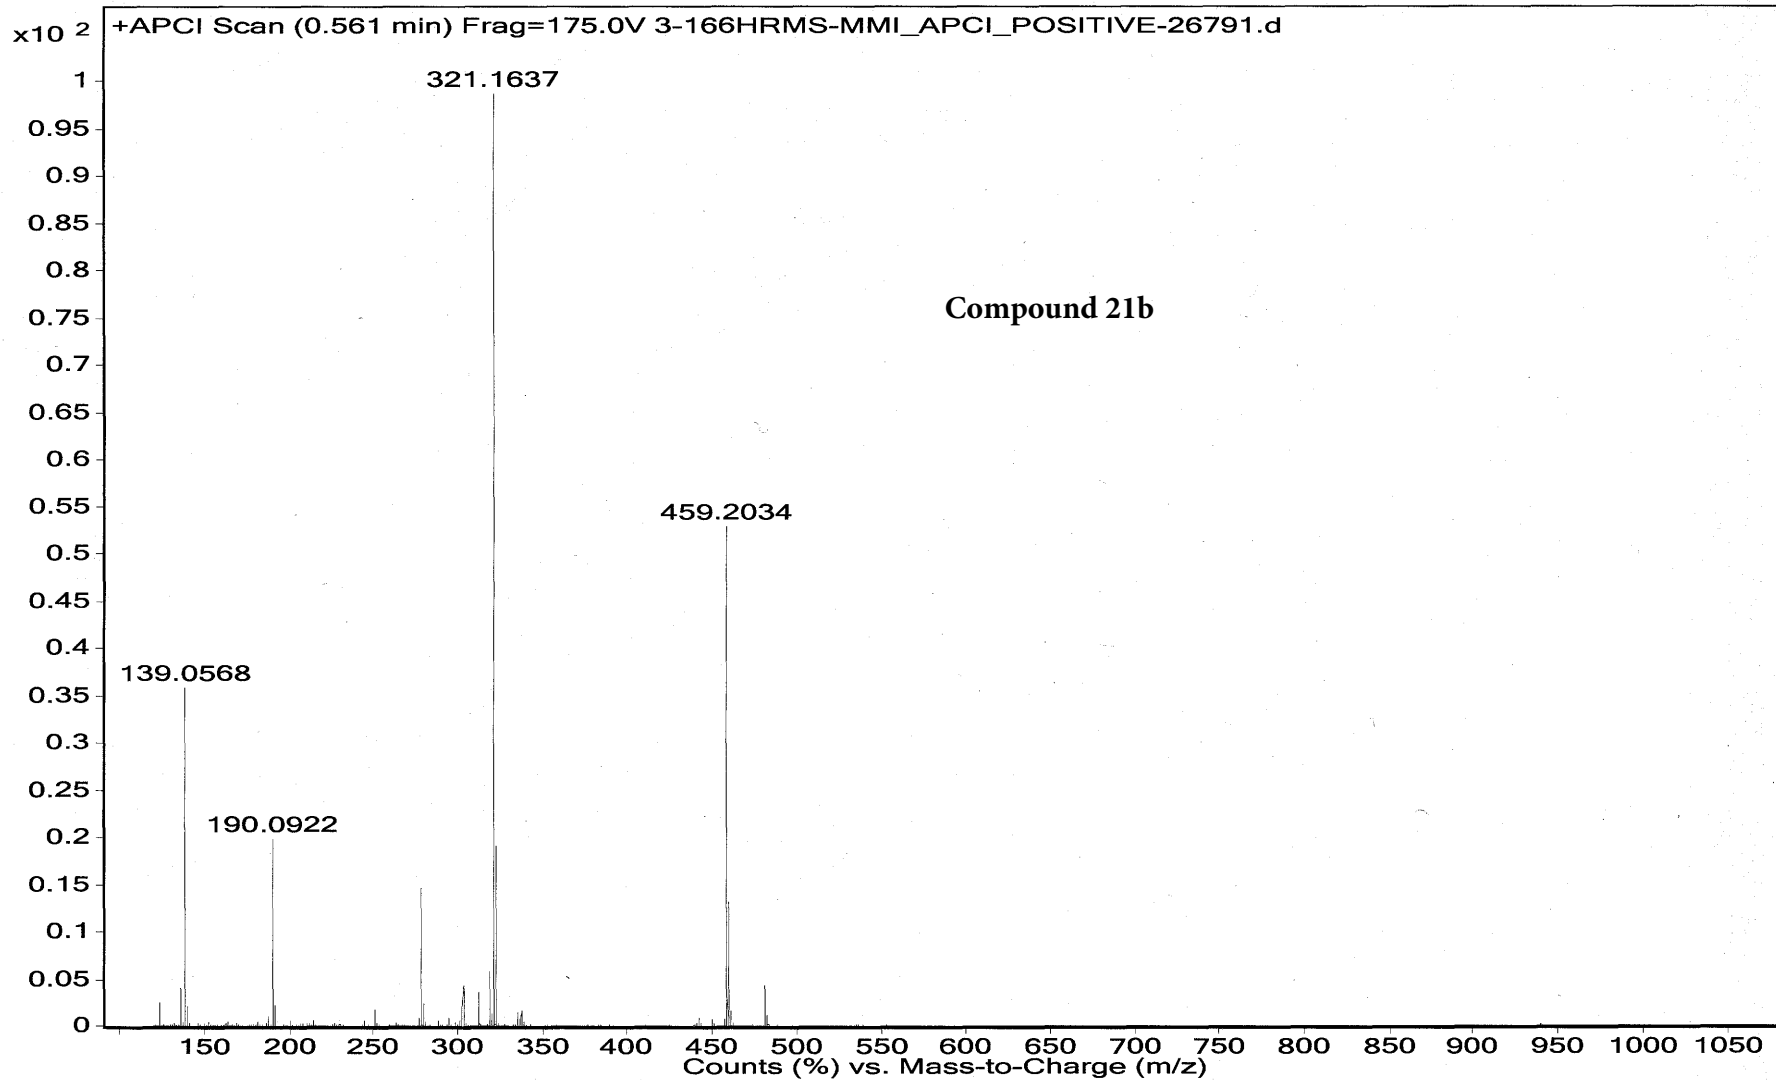

|               |                      |             |                     |                 |                                         |                        |                     |
|---------------|----------------------|-------------|---------------------|-----------------|-----------------------------------------|------------------------|---------------------|
| Sample Name   | 3-164hrms            | Position    | 24                  | Instrument Name | Instrument 1                            | User Name              | Teng Ai             |
| Inj Vol       | 5                    | InjPosition |                     | SampleType      | Unknown                                 | IRM Calibration Status | Success             |
| Data Filename | 3-164HRMS-MMI_APCI_P | ACQ Method  | MMI_APCI_POSITIVE.M | Comment         | Easy-Access Method: 'MMI_APCI_POSITIVE' | Acquired Time          | 5/1/2012 5:55:13 PM |

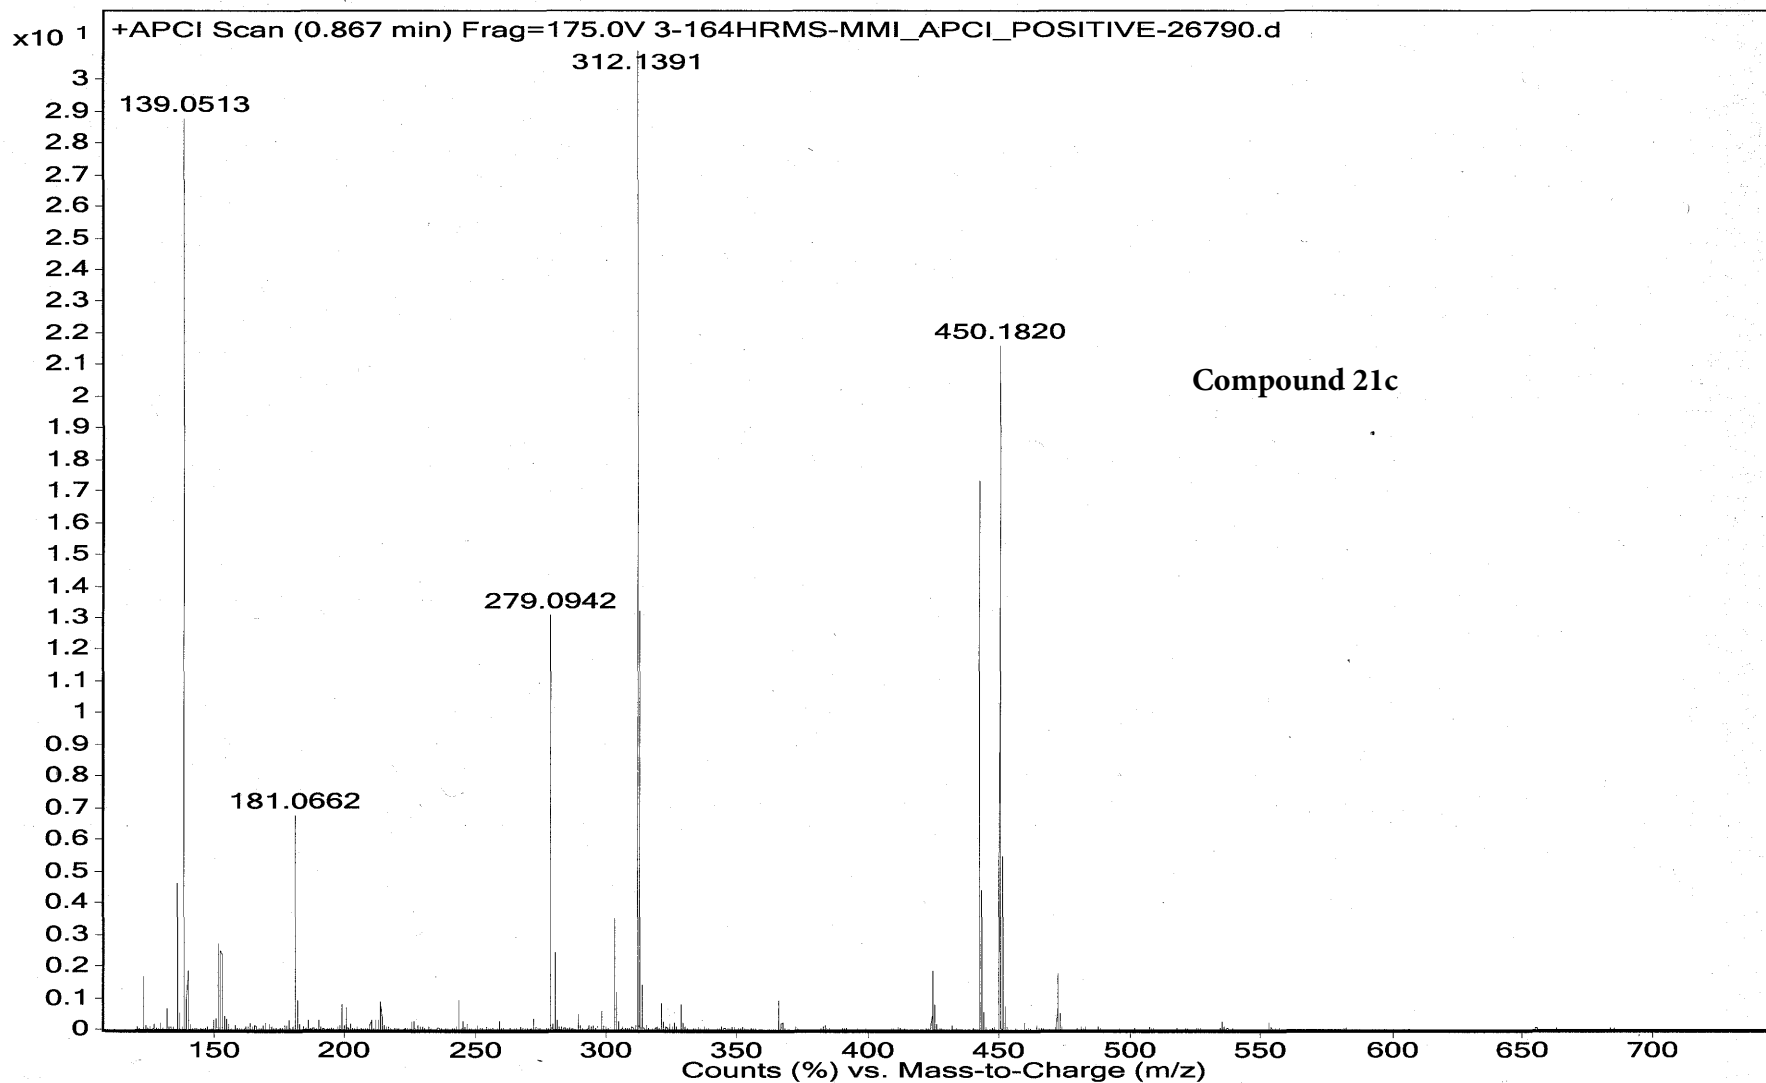

|               |                      |             |                     |                 |                                         |                        |                      |
|---------------|----------------------|-------------|---------------------|-----------------|-----------------------------------------|------------------------|----------------------|
| Sample Name   | 3-160hrms            | Position    | 53                  | Instrument Name | Instrument 1                            | User Name              | Teng Ai              |
| Inj Vol       | 5                    | InjPosition |                     | SampleType      | Unknown                                 | IRM Calibration Status | Success              |
| Data Filename | 3-160HRMS-MMI_APCI_P | ACQ Method  | MMI_APCI_POSITIVE.M | Comment         | Easy-Access Method: 'MMI_APCI_POSITIVE' | Acquired Time          | 5/30/2012 4:19:30 PM |

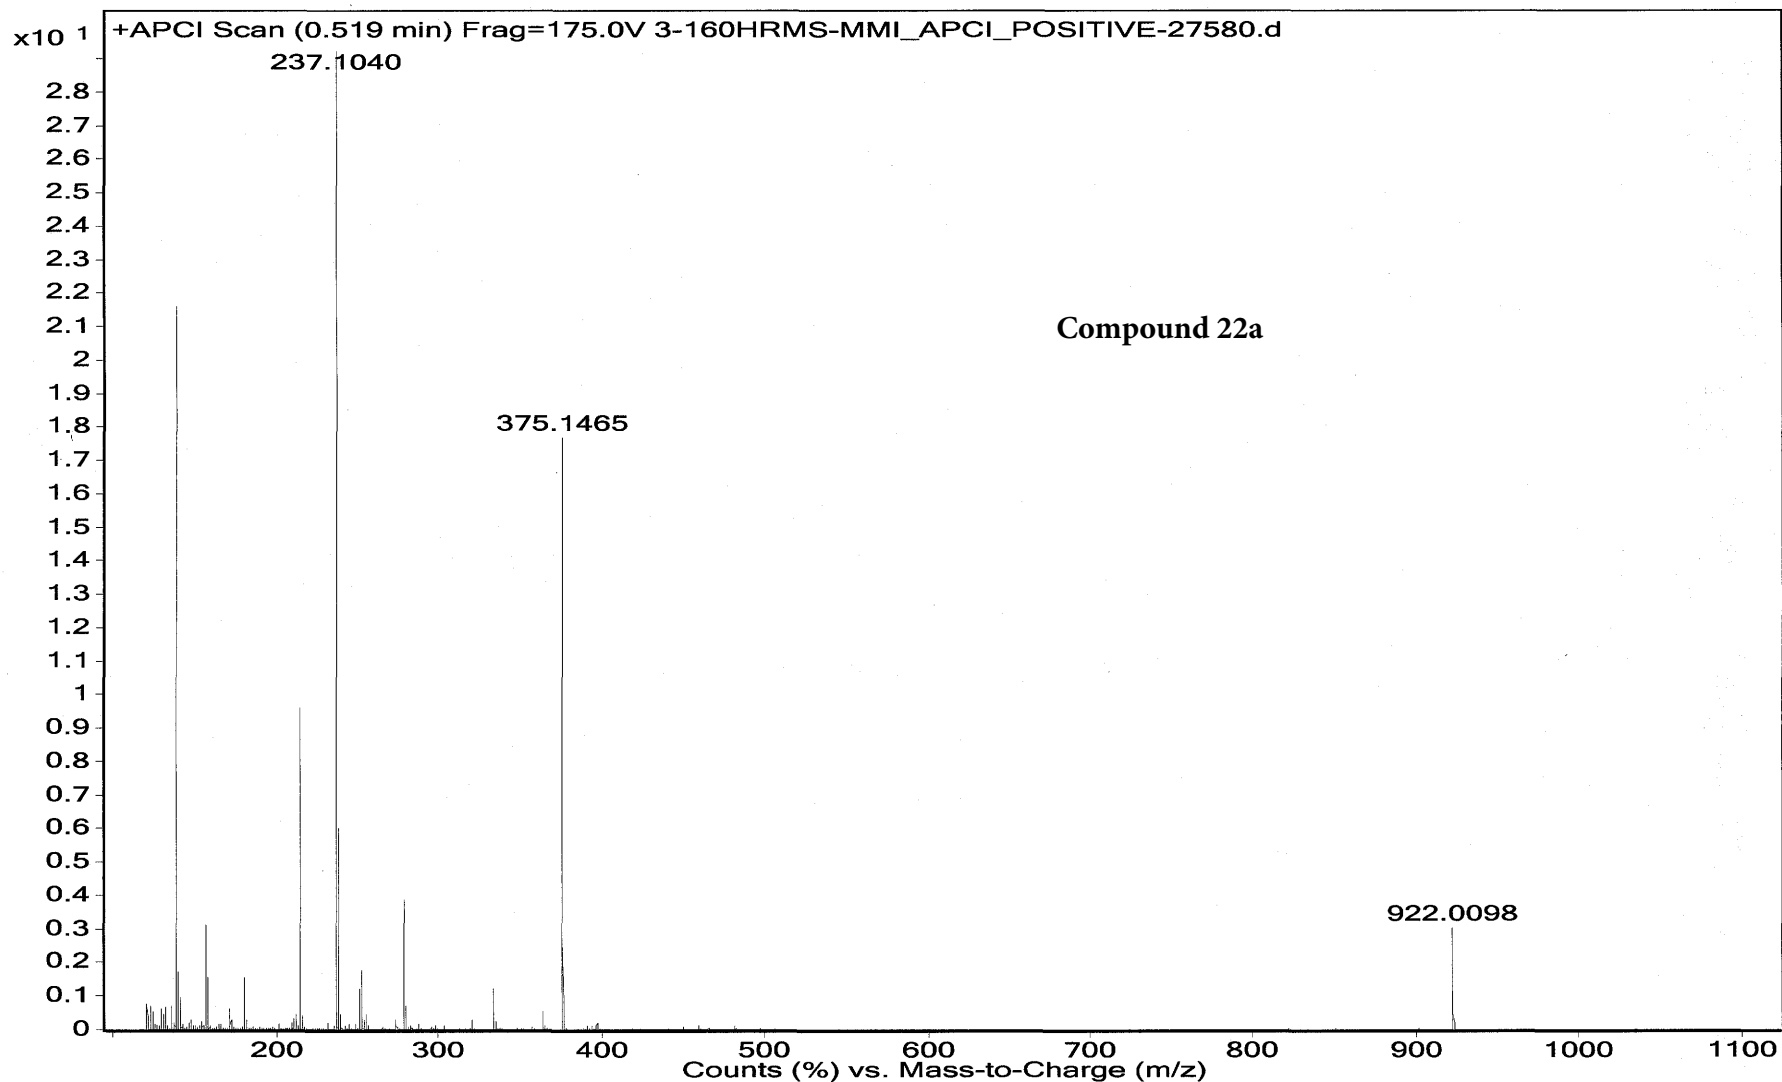

|                      |                      |                    |                     |                        |                                         |                               |                     |
|----------------------|----------------------|--------------------|---------------------|------------------------|-----------------------------------------|-------------------------------|---------------------|
| <b>Sample Name</b>   | 3-161hrms            | <b>Position</b>    | 23                  | <b>Instrument Name</b> | Instrument 1                            | <b>User Name</b>              | Teng Ai             |
| <b>Inj Vol</b>       | 5                    | <b>InjPosition</b> |                     | <b>SampleType</b>      | Unknown                                 | <b>IRM Calibration Status</b> | Success             |
| <b>Data Filename</b> | 3-161HRMS-MMI_APCI_P | <b>ACQ Method</b>  | MMI_APCI_POSITIVE.M | <b>Comment</b>         | Easy-Access Method: 'MMI_APCI_POSITIVE' | <b>Acquired Time</b>          | 5/1/2012 5:49:56 PM |

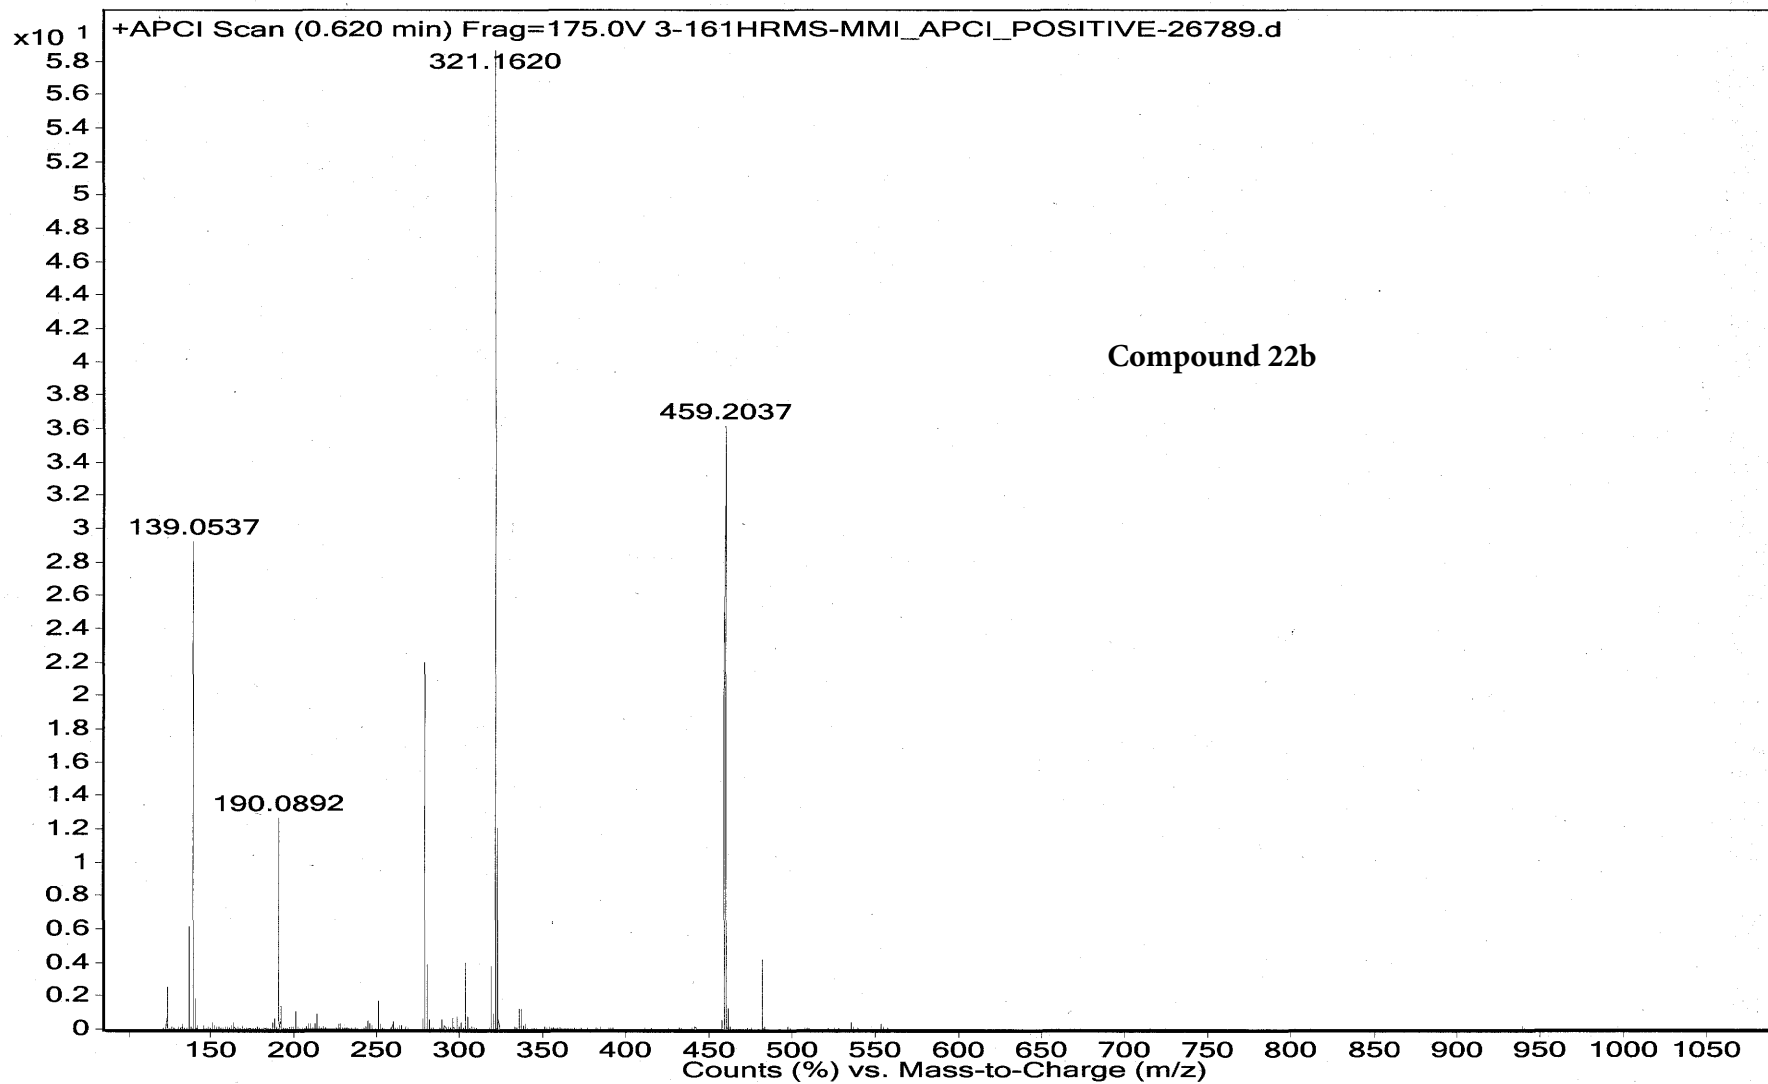

|               |                      |             |                     |                 |                                         |                        |                       |
|---------------|----------------------|-------------|---------------------|-----------------|-----------------------------------------|------------------------|-----------------------|
| Sample Name   | 3-162hrms            | Position    | 13                  | Instrument Name | Instrument 1                            | User Name              | Teng Ai               |
| Inj Vol       | 5                    | InjPosition |                     | SampleType      | Unknown                                 | IRM Calibration Status | Success               |
| Data Filename | 3-162HRMS-MMI_APCI_P | ACQ Method  | MMI_APCI_POSITIVE.M | Comment         | Easy-Access Method: 'MMI_APCI_POSITIVE' | Acquired Time          | 4/25/2012 12:56:24 PM |

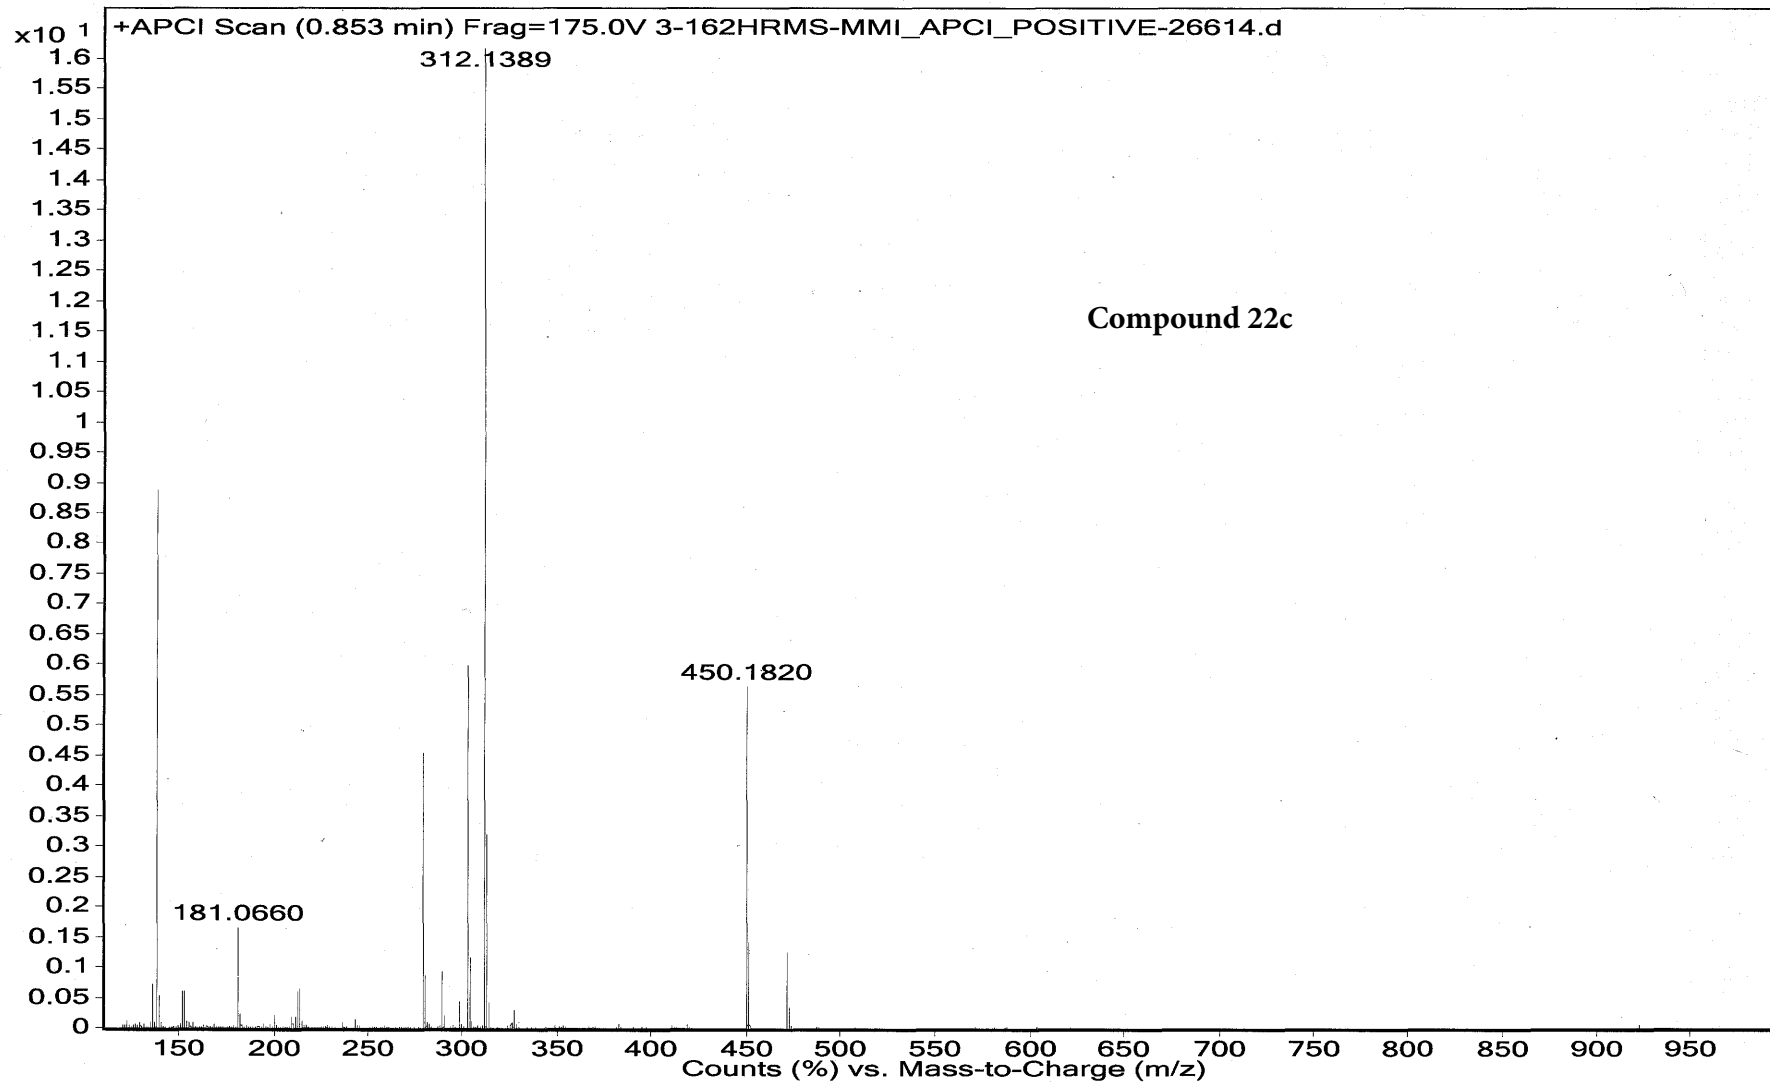

Supplement: s1 [file s1]
